# Supplementary material for: Non-tuberculous mycobacteria enhance the tryptophan-kynurenine pathway to induce immunosuppression and facilitate pulmonary colonization
Source: Front Cell Infect Microbiol. 2024 Oct 21;14:1455605. doi: 10.3389/fcimb.2024.1455605 (PMC11532197; doi:10.3389/fcimb.2024.1455605)
Supplement: Supplementary file 5 [file Table5.xlsx]

## Sheet: Sheet1
Supplementary Table6 | Metabolite Tracing in BALF of NTM/TB and Control Groups
HMDBID	KEGGID	Name	Origin	Links	Diff
NA	NA	Ziyuglycoside I	Unknown	NA	0
HMDB0259989	NA	Zardaverine	Drug related	Drug related(DrugBank:DB02918)	1
NA	NA	Yohimbinic Acid Monohydrate	Unknown	NA	0
HMDB0000098	C00181	Xyloside	Host; Microbiota; Food related; Drug related; Environment	Microbiota(BIGG:xyl__D ChEBI:15936,53455 KEGG:C00181,D06346); Food related(FooDB:FDB005944 HMDB:HMDB0000098 T3DB:T3D4926); Drug related(DrugBank:DB09419 KEGG:C00181,D06346); Environment(HMDB:HMDB0000098)	0
HMDB0000098	C01394	Xylose	Microbiota; Food related; Drug related; Environment	Microbiota(BIGG:xyl__D ChEBI:15936,53455 KEGG:C00181,D06346); Food related(FooDB:FDB005944 HMDB:HMDB0000098 T3DB:T3D4926); Drug related(DrugBank:DB09419 KEGG:C00181,D06346); Environment(HMDB:HMDB0000098)	0
HMDB0040329	NA	Xi-5-Hydroxydecanoic Acid	Food related	Food related(FooDB:FDB020054 HMDB:HMDB0040329)	0
HMDB0001554	C00655	Xanthylic Acid	Host; Microbiota; Food related	Microbiota(BIGG:xmp ChEBI:15652 KEGG:C00655); Food related(FooDB:FDB031254 HMDB:HMDB0001554)	0
HMDB0000299	C01762	Xanthosine	Host; Microbiota; Food related	Microbiota(BIGG:xtsn ChEBI:18107 KEGG:C01762); Food related(FooDB:FDB001604 HMDB:HMDB0000299)	0
HMDB0000292	C00385	Xanthine	Host; Microbiota; Food related; Drug related	Microbiota(BIGG:xan ChEBI:17712,48517 KEGG:C00385); Food related(FooDB:FDB001977 HMDB:HMDB0000292 T3DB:T3D4409); Drug related(DrugBank:DB02134)	0
HMDB0036818	NA	Vitispirane	Food related	Food related(FooDB:FDB015765 HMDB:HMDB0036818)	0
HMDB0003555	C02059	Vitamin K1	Host; Microbiota; Food related; Drug related; Environment	Microbiota(BIGG:phllqne); Food related(FooDB:FDB023333 HMDB:HMDB0003555); Drug related(DrugBank:DB01022); Environment(HMDB:HMDB0003555)	0
HMDB0243512	D01371	Vinpocetine	Drug related	Drug related(DrugBank:DB12131 KEGG:D01371)	1
HMDB0259814	C01626	Vindoline	Unknown	NA	1
HMDB0259784	C08252	Verbascose	Food related	Food related(FooDB:FDB005665)	0
NA	NA	Veratroylzygadenine	Unknown	NA	1
HMDB0001850	C07188	Verapamil	Food related; Drug related; Environment	Food related(FooDB:FDB022708 T3DB:T3D3544); Drug related(DrugBank:DB00661 KEGG:C07188,D02356 T3DB:T3D3544); Environment(HMDB:HMDB0001850 T3DB:T3D3544)	1
HMDB0000291	C05584	Vanilmandelic Acid	Host; Microbiota; Food related	Microbiota(KEGG:C05584); Food related(FooDB:FDB021931)	0
HMDB0060026	NA	Vanilloylglycine	Food related	Food related(FooDB:FDB030006)	0
HMDB0029140	NA	Valylvaline	Microbiota; Food related	Microbiota(ChEBI:73704); Food related(FooDB:FDB112141)	1
HMDB0304792	NA	Valylarginine	Food related	Food related(FooDB:FDB098233)	1
HMDB0001877	C07185	Valproic Acid	Host; Food related; Drug related; Environment	Food related(FooDB:FDB022722 HMDB:HMDB0001877 T3DB:T3D2558); Drug related(DrugBank:DB00313 KEGG:C07185,D00399 T3DB:T3D2558); Environment(T3DB:T3D2558)	0
HMDB0029134	NA	Val-Phe	Food related	Food related(FooDB:FDB112136)	1
HMDB0029130	NA	Val-Ile	Food related	Food related(FooDB:FDB112132)	1
NA	NA	Val-Gly-Val	Unknown	NA	1
HMDB0006351	NA	Vaccenyl Carnitine	Food related	Food related(FooDB:FDB023900 HMDB:HMDB0006351)	0
NA	C09249	Usambarensine	Unknown	NA	1
HMDB0000946	C07880	Ursodiol	Food related; Drug related	Food related(FooDB:FDB022332 HMDB:HMDB0000946); Drug related(DrugBank:DB01586 KEGG:C07880,D00734)	1
HMDB0000301	C00785	Urocanic Acid	Host; Microbiota; Food related; Drug related	Microbiota(BIGG:urcan KEGG:C00785); Food related(FooDB:FDB007506 HMDB:HMDB0000301); Drug related(DrugBank:DB01971)	0
HMDB0000296	C00299	Uridine	Host; Microbiota; Food related; Drug related	Microbiota(BIGG:uri ChEBI:16704 KEGG:C00299); Food related(FooDB:FDB007411 HMDB:HMDB0000296); Drug related(DrugBank:DB02745)	0
HMDB0000289	C00366	Uric Acid	Host; Microbiota; Food related; Drug related	Microbiota(BIGG:urate ChEBI:17775 KEGG:C00366); Food related(FooDB:FDB015350 HMDB:HMDB0000289); Drug related(DrugBank:DB08844)	0
HMDB0000300	C00106	Uracil	Host; Microbiota; Food related; Drug related	Microbiota(BIGG:ura ChEBI:17568 KEGG:C00106,D00027); Food related(FooDB:FDB006426 HMDB:HMDB0000300); Drug related(DrugBank:DB03419 KEGG:C00106,D00027)	0
HMDB0000888	NA	Undecanedioic Acid	Food related	Food related(FooDB:FDB022300 HMDB:HMDB0000888)	0
HMDB0000288	C00105	UMP	Host; Microbiota; Food related; Drug related	Microbiota(BIGG:ump ChEBI:16695 KEGG:C00105); Food related(FooDB:FDB031248 HMDB:HMDB0000288); Drug related(DrugBank:DB03685)	1
HMDB0000286	C00029	UDP-Glucose	Host; Microbiota; Food related; Drug related	Microbiota(BIGG:udpg ChEBI:167608,18066,46229 KEGG:C00029,G10608); Food related(FooDB:FDB005660 HMDB:HMDB0000286); Drug related(DrugBank:DB01861)	1
HMDB0000290	C00043	UDP-Glcnac	Host; Microbiota; Food related; Drug related	Microbiota(BIGG:uacgam ChEBI:16264 KEGG:C00043,G10610); Food related(FooDB:FDB021930); Drug related(DrugBank:DB03397)	1
HMDB0029118	NA	Tyr-Val	Food related	Food related(FooDB:FDB098232)	1
HMDB0029113	NA	Tyr-Pro	Food related	Food related(FooDB:FDB112116)	1
HMDB0029109	NA	Tyrosylleucine	Food related	Food related(FooDB:FDB098231)	1
HMDB0029108	NA	Tyrosylisoleucine	Food related	Food related(FooDB:FDB112112)	1
HMDB0029103	NA	Tyrosylglutamine	Food related	Food related(FooDB:FDB112107)	1
HMDB0000158	C00082	Tyrosine	Host; Microbiota; Food related; Drug related; Environment	Microbiota(BIGG:tyr__L ChEBI:17895 KEGG:C00082,D00022); Food related(FooDB:FDB000446 HMDB:HMDB0000158); Drug related(DrugBank:DB00135 KEGG:C00082,D00022); Environment(HMDB:HMDB0000158)	0
HMDB0029098	NA	Tyr-Ala	Food related	Food related(FooDB:FDB112102)	1
NA	NA	Tschimganidin	Unknown	NA	0
HMDB0000929	C00078	Tryptophan	Host; Microbiota; Food related; Drug related; Environment	Microbiota(BIGG:trp__L ChEBI:16828 KEGG:C00078,D00020); Food related(FooDB:FDB002250 HMDB:HMDB0000929 T3DB:T3D4369); Drug related(DrugBank:DB00150 KEGG:C00078,D00020 T3DB:T3D4369); Environment(HMDB:HMDB0000929)	1
HMDB0029082	NA	Trp-Glu	Food related	Food related(FooDB:FDB112087)	0
HMDB0001965	C14811	Troxilin B3	Food related	Food related(FooDB:FDB022768 HMDB:HMDB0001965)	0
HMDB0062590	C01456	Tropic Acid	Food related	Food related(FooDB:FDB098134)	1
NA	NA	Tris-(2-Chloroisopropyl)Phosphate	Unknown	NA	0
NA	NA	Triptophenolide	Unknown	NA	0
HMDB0014571	D08648	Triprolidine	Drug related	Drug related(DrugBank:DB00427 KEGG:D08648)	1
HMDB0000925	C01104	Trimethyloxamine	Microbiota; Food related; Environment	Microbiota(BIGG:tmao ChEBI:15724 HMDB:HMDB0000925 KEGG:C01104); Food related(FooDB:FDB010413 T3DB:T3D4164); Environment(T3DB:T3D4164)	0
HMDB0000043	C00719	Trimethyl Glycine	Host; Microbiota; Food related; Drug related	Microbiota(BIGG:glyb); Food related(HMDB:HMDB0000043); Drug related(DrugBank:DB04455)	0
HMDB0000875	C01004	Trigonelline	Food related	Food related(FooDB:FDB002237 HMDB:HMDB0000875)	0
NA	NA	Trifluoromethanesulfonic Acid	Food related	Food related(FooDB:FDB015485 T3DB:T3D1620)	0
HMDB0014118	NA	Trifluoroacetic Acid	Unknown	NA	0
HMDB0259191	NA	Triethyl Phosphate	Drug related	Drug related(DrugBank:DB03347)	0
HMDB0013317	NA	Tridecanoylglycine	Food related	Food related(FooDB:FDB029379)	0
HMDB0002327	NA	Tridecanedioic Acid	Food related	Food related(FooDB:FDB022963 HMDB:HMDB0002327)	0
NA	NA	Trichophycin B	Unknown	NA	0
HMDB0031193	C19806	Tricarballylic Acid	Microbiota; Food related; Drug related	Microbiota(BIGG:tcb HMDB:HMDB0031193); Food related(FooDB:FDB003213 HMDB:HMDB0031193); Drug related(DrugBank:DB04562)	0
HMDB0259164	C14439	Tributyl Phosphate	Unknown	NA	0
NA	NA	Triacetylfusarinine C	Unknown	NA	0
HMDB0000933	C16308	Traumatic Acid	Food related	Food related(FooDB:FDB022323 HMDB:HMDB0000933)	0
HMDB0013312	NA	Trans-3-Octenedioic Acid	Food related	Food related(FooDB:FDB029376 HMDB:HMDB0013312)	0
HMDB0031087	NA	Trans-2-Hexyl-1-Cyclopropaneacetic Acid	Food related	Food related(HMDB:HMDB0031087)	0
HMDB0000262	C00178	Thymine	Host; Microbiota; Food related; Drug related	Microbiota(BIGG:thym ChEBI:17821 KEGG:C00178); Food related(FooDB:FDB021922 HMDB:HMDB0000262); Drug related(DrugBank:DB03462)	1
HMDB0000273	C00214	Thymidine	Host; Microbiota; Food related; Drug related	Microbiota(BIGG:thymd ChEBI:17748 KEGG:C00214,D12466); Food related(FooDB:FDB031201 HMDB:HMDB0000273); Drug related(DrugBank:DB04485 KEGG:C00214,D12466)	1
NA	NA	Thr-Val-Leu	Unknown	NA	0
HMDB0029069	NA	Thr-Pro	Food related	Food related(FooDB:FDB112075)	1
HMDB0003252	C05963	Thromboxane B2	Food related	Food related(FooDB:FDB023130 HMDB:HMDB0003252)	0
HMDB0029065	NA	Thr-Leu	Food related	Food related(FooDB:FDB112071)	1
HMDB0029072	NA	Threonyltryptophan	Food related	Food related(FooDB:FDB112078)	1
HMDB0029068	NA	Threonylphenylalanine	Food related	Food related(FooDB:FDB112074)	1
HMDB0000167	C00188	Threonine	Host; Microbiota; Food related; Drug related; Environment	Microbiota(BIGG:thr__L ChEBI:16857 KEGG:C00188,D00041); Food related(FooDB:FDB011999 HMDB:HMDB0000167 T3DB:T3D4368); Drug related(DrugBank:DB00156 KEGG:C00188,D00041 T3DB:T3D4368); Environment(HMDB:HMDB0000167 T3DB:T3D4368)	0
NA	C18652	Thiofanox	Unknown	NA	1
HMDB0251530	C00725	Thioctic Acid	Microbiota; Food related; Drug related	Microbiota(BIGG:lipoate); Food related(FooDB:FDB004339); Drug related(DrugBank:DB00166 KEGG:C00725,D00086)	0
HMDB0000235	C00378	Thiamine	Host; Microbiota; Food related; Drug related; Environment	Microbiota(BIGG:thm ChEBI:18385 KEGG:C00378,D08580); Food related(FooDB:FDB008424 HMDB:HMDB0000235 T3DB:T3D2696); Drug related(DrugBank:DB00152 KEGG:C00378,D08580 T3DB:T3D2696); Environment(HMDB:HMDB0000235)	1
HMDB0002825	C07480	Theobromine	Host; Microbiota; Food related; Drug related	Microbiota(ChEBI:28946 KEGG:C07480); Food related(FooDB:FDB000455 HMDB:HMDB0002825); Drug related(DrugBank:DB01412)	0
NA	NA	Theaflavin Monogallate A	Unknown	NA	0
HMDB0062701	NA	TG(17:0/18:1/18:1)	Food related	Food related(HMDB:HMDB0062701)	0
HMDB0047909	NA	TG(14:1(9Z)/16:1(9Z)/16:1(9Z))	Food related	Food related(HMDB:HMDB0047909)	0
NA	NA	Teucroxide	Unknown	NA	1
NA	NA	Tetrasaccharides	Unknown	NA	0
HMDB0244121	NA	Tetrahydropyridine	Unknown	NA	1
HMDB0029835	NA	Tetrahydroharmol	Food related	Food related(HMDB:HMDB0029835)	0
HMDB0094708	NA	Tetraethylene Glycol	Unknown	NA	0
NA	NA	Tetradecyldiethanolamine	Unknown	NA	0
HMDB0000872	C11002	Tetradecanedioic Acid	Food related	Food related(FooDB:FDB022293 HMDB:HMDB0000872)	0
NA	NA	Tert-Butyl 1-(2-Furylmethyl)-5-Hydroxy-2-Methylbenzo[GIndole-3-Carboxylate	Unknown	NA	0
NA	C01410	Tert-Butoxycarbonylasparagine	Unknown	NA	1
NA	NA	Teraspiridole C	Unknown	NA	1
HMDB0303943	C01617	Taxifolin	Microbiota; Food related; Drug related	Microbiota(ChEBI:17948 KEGG:C01617); Food related(FooDB:FDB030075); Drug related(DrugBank:DB02224)	1
HMDB0002580	C03642	Taurolithocholate Sulfate	Food related	Food related(FooDB:FDB023028 HMDB:HMDB0002580)	1
HMDB0000251	C00245	Taurine	Host; Microbiota; Food related; Drug related	Microbiota(BIGG:taur ChEBI:15891 KEGG:C00245,D00047); Food related(FooDB:FDB003191 HMDB:HMDB0000251); Drug related(DrugBank:DB01956 KEGG:C00245,D00047)	0
HMDB0258632	C12043	Surfactin	Unknown	NA	0
HMDB0000907	NA	Sulfolithocholic Acid	Food related	Food related(FooDB:FDB022312 HMDB:HMDB0000907)	1
HMDB0015621	D01142	Sulfadimethoxine	Food related; Drug related	Food related(FooDB:FDB010661); Drug related(DrugBank:DB06150 KEGG:D01142)	1
HMDB0000258	C00089	Sucrose	Host; Microbiota; Food related; Drug related	Microbiota(BIGG:sucr ChEBI:17992 KEGG:C00089,D00025,G00370); Food related(FooDB:FDB003715 HMDB:HMDB0000258); Drug related(DrugBank:DB02772 KEGG:C00089,D00025,G00370)	0
HMDB0061717	NA	Succinylcarnitine	Food related	Food related(HMDB:HMDB0061717)	0
HMDB0032523	C19524	Succinic Anhydride	Food related	Food related(HMDB:HMDB0032523)	0
HMDB0000254	C00042	Succinic Acid	Host; Microbiota; Food related; Drug related	Microbiota(BIGG:succ ChEBI:15741 HMDB:HMDB0000254 KEGG:C00042); Food related(FooDB:FDB001931 HMDB:HMDB0000254 T3DB:T3D4453); Drug related(DrugBank:DB00139 T3DB:T3D4453)	1
NA	NA	Subsessiline	Unknown	NA	0
HMDB0000953	NA	Suberylglycine	Food related	Food related(FooDB:FDB022336)	0
HMDB0000893	C08278	Suberic Acid	Food related	Food related(FooDB:FDB003340 HMDB:HMDB0000893)	0
HMDB0251975	C06522	Strychnine	Food related; Drug related	Food related(T3DB:T3D3086); Drug related(DrugBank:DB15954)	0
HMDB0034146	C13846	Stearic Acid Amide	Food related	Food related(FooDB:FDB012421 HMDB:HMDB0034146)	0
HMDB0003553	C01613	Stachyose	Host; Microbiota; Food related	Microbiota(BIGG:stys KEGG:C01613,G00278); Food related(FooDB:FDB012320 HMDB:HMDB0003553)	0
NA	NA	Spiculisporic Acid	Unknown	NA	1
HMDB0000252	C00319	Sphingosine	Host; Microbiota; Food related; Drug related	Microbiota(KEGG:C00319); Food related(FooDB:FDB005463 HMDB:HMDB0000252); Drug related(DrugBank:DB03203)	0
HMDB0001256	C00750	Spermine	Host; Microbiota; Food related; Drug related	Microbiota(BIGG:sprm KEGG:C00750); Food related(FooDB:FDB003225 HMDB:HMDB0001256 T3DB:T3D4166); Drug related(DrugBank:DB00127 T3DB:T3D4166)	0
HMDB0001257	C00315	Spermidine	Host; Microbiota; Food related; Drug related	Microbiota(BIGG:spmd ChEBI:16610 KEGG:C00315); Food related(FooDB:FDB012039 HMDB:HMDB0001257 T3DB:T3D4167); Drug related(DrugBank:DB03566)	0
NA	NA	Sparteine-15-Carboxylic Acid	Unknown	NA	0
NA	NA	Smenospongine	Unknown	NA	0
HMDB0010169	C00550	SM(d18:1/16:0)	Host; Food related	Food related(FooDB:FDB027352 HMDB:HMDB0010169)	1
HMDB0258305	C09643	Sinomenine	Drug related	Drug related(DrugBank:DB16892)	1
HMDB0003070	C00493	Shikimic Acid	Microbiota; Food related	Microbiota(BIGG:skm ChEBI:16119 HMDB:HMDB0003070 KEGG:C00493); Food related(FooDB:FDB031172 HMDB:HMDB0003070)	0
HMDB0029032	NA	Serylalanine	Food related	Food related(FooDB:FDB112040)	1
HMDB0029052	NA	Ser-Val	Food related	Food related(FooDB:FDB112058)	1
HMDB0029046	NA	Ser-Phe	Food related	Food related(FooDB:FDB112053)	1
HMDB0029043	NA	Ser-Leu	Food related	Food related(FooDB:FDB112051)	1
HMDB0003219	C02076	Sedoheptulose	Host; Food related	Food related(HMDB:HMDB0003219)	0
HMDB0000792	C08277	Sebacic Acid	Microbiota; Food related; Drug related; Environment	Microbiota(ChEBI:41865); Food related(FooDB:FDB022247 HMDB:HMDB0000792 T3DB:T3D4883); Drug related(DrugBank:DB07645); Environment(HMDB:HMDB0000792 T3DB:T3D4883)	0
HMDB0006088	C06153	Scyllo-Inositol	Microbiota; Food related; Drug related	Microbiota(KEGG:C06153); Food related(FooDB:FDB023828); Drug related(DrugBank:DB03106)	0
NA	NA	Scutellarin	Unknown	NA	0
NA	NA	Sayaendoside	Unknown	NA	1
HMDB0302836	NA	Sativic Acid	Food related	Food related(FooDB:FDB006421)	0
HMDB0000271	C00213	Sarcosine	Host; Microbiota; Food related; Drug related	Microbiota(BIGG:sarcs ChEBI:15611 KEGG:C00213); Food related(FooDB:FDB004048 T3DB:T3D4458); Drug related(DrugBank:DB12519)	0
NA	NA	Sarcinaxanthin Monoglucoside	Unknown	NA	0
NA	D00154	Santonin	Drug related	Drug related(KEGG:C02206,D00154)	0
HMDB0033705	NA	Salviaflaside	Food related	Food related(FooDB:FDB011820 HMDB:HMDB0033705)	1
HMDB0029723	C12283	Saccharin	Food related; Drug related	Food related(FooDB:FDB010214 HMDB:HMDB0029723); Drug related(DrugBank:DB12418 KEGG:C12283,D01085)	0
HMDB0003572	C01850	Rosmarinic Acid	Food related; Drug related	Food related(FooDB:FDB002427 HMDB:HMDB0003572); Drug related(DrugBank:DB16865)	1
HMDB0014621	C07236	Rimantadine	Drug related	Drug related(DrugBank:DB00478 KEGG:C07236,D08483)	0
NA	NA	Rhodojaponin II	Unknown	NA	0
HMDB0014351	C06539	Reserpine	Microbiota; Food related; Drug related	Microbiota(ChEBI:28487); Food related(T3DB:T3D2713); Drug related(DrugBank:DB00206 KEGG:C06539,D00197 T3DB:T3D2713)	0
NA	NA	R-Deprenyl N-Oxide	Unknown	NA	0
HMDB0003213	C00492	Raffinose	Host; Microbiota; Food related; Drug related	Microbiota(BIGG:raffin ChEBI:16634,181444 KEGG:C00492,G00249); Food related(FooDB:FDB000661 HMDB:HMDB0003213); Drug related(DrugBank:DB16839)	0
NA	NA	Radiclonic Acid	Unknown	NA	0
HMDB0015017	C12599	Racivir	Drug related	Drug related(DrugBank:DB00879 KEGG:C12599,D01199)	1
NA	NA	Quinovin	Unknown	NA	1
NA	C06338	Quinolinol	Drug related	Drug related(DrugBank:DB04745)	0
HMDB0015044	C06527	Quinidine	Drug related	Drug related(DrugBank:DB00908 KEGG:C06527,D08458)	0
NA	NA	Quinelorane Dihydrochloride	Unknown	NA	0
HMDB0042004	C00296	Quinaldine	Food related	Food related(HMDB:HMDB0042004)	0
HMDB0000243	C00022	Pyruvate	Host; Microbiota; Food related; Drug related	Microbiota(BIGG:pyr ChEBI:15361,32816 HMDB:HMDB0000243 KEGG:C00022); Food related(FooDB:FDB031141 HMDB:HMDB0000243 T3DB:T3D4325); Drug related(DrugBank:DB00119 T3DB:T3D4325)	0
NA	NA	Pyroglu-Val	Unknown	NA	1
NA	NA	Pyroglu-Tyr	Unknown	NA	1
NA	NA	Pyroglutamylisoleucine	Unknown	NA	1
HMDB0039229	NA	Pyroglutaminylglutamine	Food related	Food related(FooDB:FDB018762 HMDB:HMDB0039229)	1
NA	NA	Pyroglu-Pro	Unknown	NA	0
NA	NA	Pyroglu-Ile-Arg	Unknown	NA	1
HMDB0001431	C00534	Pyridoxamine Dihydrochloride	Host; Microbiota; Food related; Drug related	Microbiota(BIGG:pydam ChEBI:16410 KEGG:C00534); Food related(FooDB:FDB021819 HMDB:HMDB0001431); Drug related(DrugBank:DB11673)	1
HMDB0001491	C00018	Pyridoxal Phosphate	Host; Microbiota; Food related; Drug related	Microbiota(BIGG:pydx5p ChEBI:18405 KEGG:C00018,D00006); Food related(FooDB:FDB021820 HMDB:HMDB0001491); Drug related(DrugBank:DB00114 KEGG:C00018,D00006)	0
HMDB0000926	C00747	Pyridine	Food related	Food related(FooDB:FDB014733 HMDB:HMDB0000926)	0
HMDB0013139	C14519	Pyrenol	Food related; Environment	Food related(FooDB:FDB029309); Environment(HMDB:HMDB0013139)	0
HMDB0014483	C01956	Pyrazinamide	Drug related	Drug related(DrugBank:DB00339 KEGG:C01956,D00144)	0
NA	NA	Psicose	Drug related	Drug related(DrugBank:DB15087)	0
HMDB0001271	C01168	Pseudouridine 5-Phosphate	Microbiota; Food related; Drug related	Microbiota(KEGG:C01168); Food related(FooDB:FDB022525 HMDB:HMDB0001271); Drug related(DrugBank:DB03829)	0
HMDB0000767	C02067	Pseudouridine	Microbiota; Food related	Microbiota(KEGG:C02067); Food related(FooDB:FDB031139 HMDB:HMDB0000767)	0
HMDB0001943	C02765	Pseudoephedrine	Food related; Drug related; Environment	Food related(FooDB:FDB022758 T3DB:T3D4555); Drug related(DrugBank:DB00852 KEGG:C02765,D08449 T3DB:T3D4555); Environment(T3DB:T3D4555)	0
HMDB0060503	C07090	Protoanemonin	Microbiota	Microbiota(KEGG:C07090)	0
HMDB0256846	D01380	Propyphenazone	Drug related	Drug related(DrugBank:DB13524 KEGG:D01380)	0
NA	NA	Propylene Glycol Phenyl Ether	Unknown	NA	0
NA	C18885	Propamocarb	Unknown	NA	0
HMDB0029135	NA	Prolylvaline	Food related	Food related(FooDB:FDB098235)	1
HMDB0011180	NA	Prolylproline	Microbiota; Food related	Microbiota(ChEBI:73646); Food related(FooDB:FDB027952)	1
HMDB0006695	NA	Prolylhydroxyproline	Food related	Food related(FooDB:FDB024028)	0
HMDB0029011	NA	Prolylarginine	Food related	Food related(FooDB:FDB112027)	1
HMDB0029010	NA	Prolylalanine	Food related	Food related(FooDB:FDB112026)	0
HMDB0003411	C00763	Proline	Host; Microbiota; Food related; Drug related	Microbiota(HMDB:HMDB0003411 KEGG:C00763); Food related(FooDB:FDB023166); Drug related(DrugBank:DB02853)	1
HMDB0029015	NA	Pro-Gln	Food related	Food related(FooDB:FDB112030)	1
HMDB0256790	C10986	Procymidone	Unknown	NA	0
HMDB0014888	C07531	Prilocaine	Drug related	Drug related(DrugBank:DB00750 KEGG:C07531,D00553)	0
HMDB0030124	C01390	Prenol	Microbiota; Food related	Microbiota(KEGG:C01390); Food related(FooDB:FDB001927 HMDB:HMDB0030124)	0
HMDB0000245	C00931	Porphobilinogen	Host; Microbiota; Food related; Drug related	Microbiota(BIGG:ppbng ChEBI:17381 KEGG:C00931); Food related(FooDB:FDB021916 HMDB:HMDB0000245 T3DB:T3D4274); Drug related(DrugBank:DB02272)	1
HMDB0257686	NA	Polyinosinic Acid	Food related	Food related(FooDB:FDB019972)	1
HMDB0245678	NA	P-Nitrophenyl-Alpha-Galactopyranoside	Unknown	NA	1
HMDB0033482	NA	Plantagonine	Food related	Food related(FooDB:FDB011526 HMDB:HMDB0033482)	0
HMDB0041993	NA	Pivaloylcarnitine	Food related	Food related(FooDB:FDB098028 HMDB:HMDB0041993)	0
HMDB0014730	C07973	Piperazine	Food related; Drug related	Food related(FooDB:FDB012189); Drug related(DrugBank:DB00592 KEGG:C07973,D00807)	0
HMDB0000070	C00408	Pipecolic Acid	Host; Microbiota; Food related	Microbiota(BIGG:Lpipecol HMDB:HMDB0000070 KEGG:C00408); Food related(FooDB:FDB000545 HMDB:HMDB0000070)	1
HMDB0015095	C07445	Pindolol	Drug related	Drug related(DrugBank:DB00960 KEGG:C07445,D00513)	0
HMDB0000857	C02656	Pimelic Acid	Microbiota; Food related; Drug related	Microbiota(BIGG:pime ChEBI:30531 KEGG:C02656); Food related(FooDB:FDB022283 HMDB:HMDB0000857); Drug related(DrugBank:DB01856)	0
HMDB0000267	C01879	Pidolic Acid	Host; Microbiota; Food related; Drug related	Microbiota(BIGG:5oxpro KEGG:C01879); Food related(FooDB:FDB014506 HMDB:HMDB0000267 T3DB:T3D4270); Drug related(DrugBank:DB03088)	0
HMDB0004610	C12144	Phytosphingosine	Host; Microbiota; Food related; Drug related	Microbiota(BIGG:psphings ChEBI:191244,46961 KEGG:C12144); Food related(FooDB:FDB023381 HMDB:HMDB0004610); Drug related(DrugBank:DB14119)	0
HMDB0256511	C10746	Phyllanthin	Unknown	NA	0
HMDB0256502	NA	Phthalimide	Unknown	NA	0
HMDB0256501	NA	Phthalic Anhydride	Unknown	NA	0
HMDB0000224	C00346	Phosphorylethanolamine	Host; Microbiota; Food related; Drug related	Microbiota(BIGG:ethamp KEGG:C00346); Food related(FooDB:FDB031115 HMDB:HMDB0000224); Drug related(DrugBank:DB01738)	1
HMDB0001429	C00009	Phosphoric Acid	Microbiota; Food related; Drug related	Microbiota(BIGG:pi); Food related(FooDB:FDB013380 HMDB:HMDB0001429 T3DB:T3D4896); Drug related(DrugBank:DB09394 KEGG:C00009,D05467)	0
HMDB0001565	C00588	Phosphocholine	Host; Microbiota; Food related; Drug related	Microbiota(BIGG:cholp KEGG:C00588); Food related(FooDB:FDB031111 HMDB:HMDB0001565); Drug related(DrugBank:DB03945)	0
HMDB0029007	NA	Phe-Tyr	Food related	Food related(FooDB:FDB112023)	1
HMDB0029005	NA	Phe-Thr	Food related	Food related(FooDB:FDB112021)	1
HMDB0011177	NA	Phe-Pro	Food related	Food related(FooDB:FDB111640)	0
HMDB0060015	C00850	Phenylsulfate	Drug related	Drug related(DrugBank:DB14667)	0
HMDB0033251	NA	Phenylmethyl Benzeneacetate	Food related	Food related(FooDB:FDB011272 HMDB:HMDB0033251)	0
HMDB0245113	C07499	Phenylethylmalonamide	Unknown	NA	0
HMDB0013302	NA	Phenylalanylphenylalanine	Microbiota; Food related	Microbiota(ChEBI:72723); Food related(FooDB:FDB029369)	1
HMDB0253025	NA	Phenylalanylleucine	Unknown	NA	1
HMDB0028997	NA	Phenylalanylhistidine	Food related	Food related(FooDB:FDB112016)	1
HMDB0304788	NA	Phenylalanyl-Glycine	Food related	Food related(FooDB:FDB098221)	1
HMDB0028995	NA	Phenylalanylglycine	Food related	Food related(FooDB:FDB112015)	1
HMDB0028994	NA	Phenylalanylglutamate	Food related	Food related(FooDB:FDB112014)	1
HMDB0029009	NA	Phenylalanyl-Gamma-Glutamate	Food related	Food related(FooDB:FDB112025)	1
HMDB0028989	NA	Phenylalanylarginine	Food related	Food related(FooDB:FDB112009)	1
HMDB0304787	NA	Phenylalanylalanine	Food related	Food related(FooDB:FDB098220)	1
HMDB0000159	C00079	Phenylalanine	Host; Microbiota; Food related; Drug related; Environment	Microbiota(BIGG:phe__L ChEBI:17295 KEGG:C00079,D00021); Food related(FooDB:FDB004940 HMDB:HMDB0000159 T3DB:T3D4366); Drug related(DrugBank:DB00120 KEGG:C00079,D00021 T3DB:T3D4366); Environment(HMDB:HMDB0000159 T3DB:T3D4366)	0
HMDB0006344	C04148	Phenylacetylglutamine	Microbiota; Food related	Microbiota(HMDB:HMDB0006344); Food related(FooDB:FDB023896)	0
HMDB0000209	C07086	Phenylacetic Acid	Host; Microbiota; Food related; Drug related; Environment	Microbiota(BIGG:pac ChEBI:30745 HMDB:HMDB0000209 KEGG:C07086); Food related(FooDB:FDB031100 HMDB:HMDB0000209 T3DB:T3D4153); Drug related(DrugBank:DB09269); Environment(T3DB:T3D4153)	0
NA	NA	Phenyl Hexopyranoside	Unknown	NA	0
HMDB0040733	C00548	Phenyl Acetate	Microbiota; Food related	Microbiota(BIGG:pac); Food related(FooDB:FDB020542 HMDB:HMDB0040733)	0
HMDB0000228	C00146	Phenol	Microbiota; Food related; Drug related; Environment	Microbiota(BIGG:phenol HMDB:HMDB0000228 KEGG:C00146,C15584,D00033); Food related(FooDB:FDB000893 HMDB:HMDB0000228 T3DB:T3D0182); Drug related(DrugBank:DB03255 KEGG:C00146,C15584,D00033 T3DB:T3D0182); Environment(HMDB:HMDB0000228 T3DB:T3D0182)	1
HMDB0029001	NA	Phe-Met	Food related	Food related(FooDB:FDB112019)	1
HMDB0028993	NA	Phe-Gln	Food related	Food related(FooDB:FDB112013)	1
NA	NA	PG 16:0_20:5;O	Unknown	NA	0
NA	NA	PFSM-perfluoroalkyl_sulfonamide	Unknown	NA	0
NA	NA	PFSM-ammonio_N_CMAmP_FT_FOSA	Unknown	NA	1
NA	NA	PFSM-ammonio	Unknown	NA	1
NA	NA	PFSA-Cl	Unknown	NA	0
NA	NA	PFCA-unsaturated	Unknown	NA	0
NA	NA	PFCA-H	Unknown	NA	0
NA	NA	PFAP-PAP	Unknown	NA	0
NA	NA	PFAP-diPAP	Unknown	NA	0
NA	NA	Peucenin	Unknown	NA	1
HMDB0256329	NA	Perfluorooctanoic Acid	Unknown	NA	0
HMDB0031608	D03467	Peracetic Acid	Food related; Drug related	Food related(HMDB:HMDB0031608); Drug related(DrugBank:DB14556 KEGG:D03467)	0
HMDB0041974	C02575	Pentachlorophenol	Microbiota; Environment	Microbiota(KEGG:C02575); Environment(HMDB:HMDB0041974 T3DB:T3D0045)	0
HMDB0256221	C11019	Pendimethalin	Unknown	NA	1
NA	NA	Peloruside B	Unknown	NA	1
HMDB0001858	C01468	P-Cresol	Microbiota; Food related; Drug related; Environment	Microbiota(BIGG:4crsol ChEBI:17847 HMDB:HMDB0001858 KEGG:C01468); Food related(FooDB:FDB008789 HMDB:HMDB0001858 T3DB:T3D0170); Drug related(DrugBank:DB01688); Environment(HMDB:HMDB0001858 T3DB:T3D0170)	0
NA	NA	PC(17:1/18:2)	Unknown	NA	1
NA	NA	PC(17:0/20:4(4Z,7Z,10Z,13Z))	Unknown	NA	1
NA	NA	PC(17:0/18:2(4Z,7Z))	Unknown	NA	0
HMDB0007949	C00157	PC(15:0/20:4(5Z,8Z,11Z,14Z))	Host; Microbiota; Food related	Microbiota(KEGG:C00157); Food related(FooDB:FDB025141 HMDB:HMDB0007949)	0
HMDB0304820	C05944	Pantothenol	Food related; Drug related	Food related(FooDB:FDB008430 HMDB:HMDB0004231); Drug related(DrugBank:DB09357 KEGG:C05944,D00193)	0
HMDB0000210	C00864	Pantothenic Acid	Host; Microbiota; Food related; Drug related	Microbiota(BIGG:pnto__R ChEBI:46905,7916 KEGG:C00864,D07413); Food related(FooDB:FDB030151 HMDB:HMDB0000210); Drug related(DrugBank:DB01783 KEGG:C00864,D07413)	0
HMDB0256083	C01742	Palatinose	Microbiota	Microbiota(BIGG:pala ChEBI:18394)	0
HMDB0000208	C00026	Oxoglutaric Acid	Host; Microbiota; Food related; Drug related	Microbiota(BIGG:akg ChEBI:16810,30915 HMDB:HMDB0000208 KEGG:C00026); Food related(FooDB:FDB003361 HMDB:HMDB0000208); Drug related(DrugBank:DB08845)	0
HMDB0002329	C00209	Oxalic Acid	Microbiota; Food related; Drug related	Microbiota(BIGG:oxa HMDB:HMDB0002329 KEGG:C00209); Food related(FooDB:FDB031074 HMDB:HMDB0002329 T3DB:T3D0856); Drug related(DrugBank:DB03902)	0
HMDB0015224	C01443	Ouabain	Microbiota; Food related; Drug related; Environment	Microbiota(ChEBI:472805); Food related(FooDB:FDB005482 HMDB:HMDB0015224); Drug related(DrugBank:DB01092 KEGG:C01443,D00112 T3DB:T3D4018); Environment(T3DB:T3D4018)	1
NA	NA	O-Trimethoxy-3,4,5-Benzoyl-Oh-Vincamajine	Unknown	NA	1
HMDB0035141	NA	Oseltamivir Acid	Food related; Drug related	Food related(FooDB:FDB013777 HMDB:HMDB0035141); Drug related(DrugBank:DB02600)	0
HMDB0000214	C00077	Ornithine	Host; Microbiota; Food related; Drug related	Microbiota(BIGG:orn KEGG:C00077,D08302); Food related(FooDB:FDB030969 HMDB:HMDB0000214); Drug related(DrugBank:DB00129 KEGG:C00077,D08302)	0
HMDB0240784	NA	O-Propanoyl-D-Carnitine	Unknown	NA	0
HMDB0005765	C21016	Ophthalmic Acid	Host; Food related	Food related(FooDB:FDB023755)	0
NA	NA	Okaramine R	Unknown	NA	0
HMDB0031031	NA	O-Dodecylbenzenesulfonic Acid	Food related	Food related(HMDB:HMDB0031031)	0
HMDB0060997	NA	O-Desmethyl Tramadol	Unknown	NA	0
HMDB0004825	C04227	Octopamine	Food related; Drug related	Food related(FooDB:FDB010584 HMDB:HMDB0004825); Drug related(DrugBank:DB13251)	1
HMDB0000482	C06423	Octanoic Acid	Host; Microbiota; Food related; Drug related	Microbiota(BIGG:octa ChEBI:28837 KEGG:C06423,D05220); Food related(FooDB:FDB003336 HMDB:HMDB0000482 T3DB:T3D4594); Drug related(DrugBank:DB04519 KEGG:C06423,D05220)	0
HMDB0304442	NA	Octadecenedioic Acid	Food related	Food related(FooDB:FDB031068)	0
HMDB0240655	NA	O-Cresol Sulfate	Unknown	NA	0
HMDB0240777	NA	O-(17-Carboxyheptadecanoyl)Carnitine	Unknown	NA	0
HMDB0013286	NA	N-Undecanoylglycine	Food related	Food related(FooDB:FDB029363)	0
NA	NA	N-Phenyl[(9,11,13-Trimethyl-8,15-Dioxatetracyclo[10.2.2.0<2,7.0<9,14Hexadec A-2(7),3,5-Trien-12-Yl)MethoxyCarboxamide	Unknown	NA	1
HMDB0034737	NA	Notoginsenoside Fe	Food related	Food related(FooDB:FDB013279 HMDB:HMDB0034737)	0
HMDB0013716	C01826	Norvaline	Microbiota; Food related; Drug related	Microbiota(ChEBI:18314); Food related(FooDB:FDB005441); Drug related(DrugBank:DB04185)	0
HMDB0001645	C01933	Norleucine	Food related; Drug related	Food related(FooDB:FDB022699); Drug related(DrugBank:DB15458)	0
HMDB0061006	NA	Norfentanyl	Unknown	NA	0
HMDB0013279	NA	N-Nonanoylglycine	Food related	Food related(FooDB:FDB029362)	0
HMDB0002141	NA	N-Methyl-A-Aminoisobutyric Acid	Food related	Food related(FooDB:FDB022865)	0
HMDB0255165	NA	N-Lauroylsarcosine	Food related	Food related(T3DB:T3D3622)	0
HMDB0062181	NA	N-Lactoylvaline	Unknown	NA	0
HMDB0062178	NA	N-Lactoyl-Tryptophan	Unknown	NA	0
HMDB0062176	NA	N-Lactoylleucine	Unknown	NA	0
HMDB0062183	NA	N-Lactoyl-Glycine	Unknown	NA	0
HMDB0014545	C07699	Nisoldipine	Drug related	Drug related(DrugBank:DB00401 KEGG:C07699,D00618)	1
HMDB0255025	C05324	Nicotianamine	Food related	Food related(FooDB:FDB004236)	1
HMDB0001488	C00253	Niacin	Host; Microbiota; Food related; Drug related; Environment	Microbiota(BIGG:nac ChEBI:15940 KEGG:C00253,D00049); Food related(FooDB:FDB001014 HMDB:HMDB0001488 T3DB:T3D2841); Drug related(DrugBank:DB00627 KEGG:C00253,D00049 T3DB:T3D2841); Environment(HMDB:HMDB0001488 T3DB:T3D2841)	0
HMDB0062503	C14789	N-Hydroxy-1-Aminonaphthalene	Unknown	NA	0
NA	NA	N-Fructosyl Pyroglutamate	Unknown	NA	0
NA	NA	N-Fructosyl Isoleucylglutamate	Unknown	NA	0
NA	NA	N-Fructosyl Isoleucine	Unknown	NA	1
HMDB0032805	NA	N-Feruloyloctopamine	Food related	Food related(FooDB:FDB010779 HMDB:HMDB0032805)	0
NA	NA	N-Ethyl-N-(4-Ethylphenyl)-2-[(4-Hydroxyquinazolin-2-Yl)ThioAcetamide	Unknown	NA	1
NA	NA	N-Epsilon-Formyl-L-Lysine	Unknown	NA	1
HMDB0255504	D08258	Nefopam	Drug related	Drug related(DrugBank:DB12293)	0
HMDB0013267	NA	N-Decanoylglycine	Food related	Food related(FooDB:FDB029360)	0
NA	NA	N-Cyclopentyl-2-{4-[(6-Ethoxy-2-Oxochromen-4-Yl)MethylPiperazinyl}Acetamide	Unknown	NA	1
NA	NA	N-Cyclohexyl-2-[1-(4-Methoxyphenyl)(1,2,3,4-Tetrahydrobeta-Carbolin-2-Yl)Acet Amide	Unknown	NA	1
NA	NA	N-Butylbenzenesulfonamide	Microbiota; Drug related	Microbiota(ChEBI:44237); Drug related(DrugBank:DB02055)	0
HMDB0002927	C09789	Naringin	Microbiota; Food related; Drug related	Microbiota(KEGG:C09789); Food related(FooDB:FDB011866 HMDB:HMDB0002927); Drug related(DrugBank:DB16859)	1
NA	C10954	Naproanilide	Unknown	NA	1
HMDB0000446	C12989	N-Alpha-Acetyl-L-Lysine	Food related	Food related(FooDB:FDB022051)	0
NA	NA	Nafadotride	Unknown	NA	1
HMDB0011757	NA	N-Acetylvaline	Food related	Food related(FooDB:FDB028427)	0
HMDB0240253	C19478	N-Acetyltaurine	Unknown	NA	0
HMDB0001186	C02567	N-Acetylspermine	Microbiota; Food related	Microbiota(BIGG:N1sprm); Food related(FooDB:FDB022474 HMDB:HMDB0001186)	0
HMDB0002064	C02714	N-Acetylputrescine	Host; Microbiota; Food related	Microbiota(BIGG:aprut HMDB:HMDB0002064 KEGG:C02714); Food related(FooDB:FDB022827)	1
HMDB0000512	C03519	N-Acetylphenylalanine	Microbiota; Food related	Microbiota(KEGG:C03519); Food related(FooDB:FDB022084)	0
HMDB0003357	C00437	N-Acetylornithine	Host; Microbiota; Food related	Microbiota(BIGG:acorn ChEBI:16543,181895 KEGG:C00437); Food related(FooDB:FDB031020 HMDB:HMDB0003357)	0
HMDB0000230	C00270	N-Acetylneuraminic Acid	Host; Microbiota; Food related; Drug related	Microbiota(BIGG:acnam); Food related(HMDB:HMDB0000230); Drug related(DrugBank:DB04265)	0
HMDB0011745	C02712	N-Acetylmethionine	Food related; Drug related	Food related(FooDB:FDB001089); Drug related(DrugBank:DB01646)	0
HMDB0011756	C02710	N-Acetylleucine	Food related; Drug related	Food related(FooDB:FDB028426); Drug related(DrugBank:DB16956)	0
HMDB0004620	NA	N-Acetyl-L-Arginine	Food related; Drug related	Food related(FooDB:FDB023383 HMDB:HMDB0004620); Drug related(DrugBank:DB01985)	0
HMDB0061684	NA	N-Acetylisoleucine	Unknown	NA	0
HMDB0013253	C05135	N-Acetylhistamine	Food related; Drug related	Food related(FooDB:FDB012595 HMDB:HMDB0013253); Drug related(DrugBank:DB04622)	0
HMDB0000803	C03878	N-Acetylglucosamine	Food related	Food related(FooDB:FDB031025)	0
HMDB0000781	C16265	N-Acetylgalactosamine 4-Sulfate	Food related; Drug related	Food related(FooDB:FDB022238); Drug related(DrugBank:DB01872)	0
HMDB0041943	C12271	N-Acetyldopamine	Food related	Food related(FooDB:FDB111680)	0
HMDB0000812	C01042	N-Acetylaspartic Acid	Host; Microbiota; Food related	Microbiota(KEGG:C01042); Food related(FooDB:FDB022260 T3DB:T3D4310)	0
HMDB0000766	NA	N-Acetylalanine	Microbiota; Food related; Drug related	Microbiota(ChEBI:40992); Food related(FooDB:FDB022231); Drug related(DrugBank:DB02518)	1
HMDB0000912	NA	N6-Succinyladenosine	Food related	Food related(FooDB:FDB022314)	0
NA	NA	N6-Benzyl-9H-Purine-2,6-Diamine	Unknown	NA	1
HMDB0000206	C02727	N6-Acetyl-L-Lysine	Microbiota; Food related	Microbiota(KEGG:C02727); Food related(FooDB:FDB000476 HMDB:HMDB0000206)	1
HMDB0240345	NA	N2,N5-Diacetylornithine	Unknown	NA	1
HMDB0001276	C00612	N1-Acetylspermidine	Microbiota; Food related	Microbiota(BIGG:N1aspmd ChEBI:17927); Food related(FooDB:FDB022530 HMDB:HMDB0001276)	0
HMDB0041947	NA	N1,N8-Diacetylspermidine	Food related	Food related(FooDB:FDB111683)	1
NA	NA	N-{4-[N-BenzylcarbamoylPhenyl}(3,4,5-Trimethoxyphenyl)Carboxamide	Unknown	NA	1
NA	NA	N-{4-[(3,5-Dimethoxyphenyl)CarbonylaminoPhenyl}Acetamide	Unknown	NA	1
NA	NA	N-{(1E)-2-[4-(Dimethylamino)Phenyl-1-Azavinyl}-2-[(3,5-Dioxo(2H,4H-1,2,4-Tria Zin-6-Yl))AminoAcetamide	Unknown	NA	1
NA	NA	N-[4-(Methylethyl)Phenyl-2-(9-Methyl-6-Oxohydropurin-8-Ylthio)Butanamide	Unknown	NA	1
NA	NA	N-[3,5-Dimethyl-4-(2-Morpholin-4-Yl-2-Oxoethoxy)Phenyl(3,4,5-Trimethoxyphenyl )Carboxamide	Unknown	NA	1
NA	NA	N-[3,5-Bis(Trifluoromethyl)Phenyl-2-(2-1,2,3,4-Tetrahydroisoquinolyl)Acetamid E	Unknown	NA	1
NA	NA	N-[2-(3,4-Dimethoxyphenyl)Ethyl-2-(4-Methylphenoxy)Acetamide	Unknown	NA	0
NA	NA	N-[(1E)-2-(3,4,5-Trimethoxyphenyl)-1-Azavinyl-N-(3,4-Dimethylphenyl)Butane-1 ,4-Diamide	Unknown	NA	1
NA	NA	N-[(1E)-2-(3,4,5-Trimethoxyphenyl)-1-Azavinyl-N-(2-Methylphenyl)Butane-1,4-D Iamide	Unknown	NA	0
HMDB0032562	C11016	N,N-Diphenylamine	Food related; Environment	Food related(FooDB:FDB010494 HMDB:HMDB0032562 T3DB:T3D4497); Environment(HMDB:HMDB0032562 T3DB:T3D4497)	0
HMDB0001539	C03626	N,N-Dimethylarginine	Food related; Drug related; Environment	Food related(FooDB:FDB000508 HMDB:HMDB0001539 T3DB:T3D4171); Drug related(DrugBank:DB01686); Environment(T3DB:T3D4171)	0
HMDB0240365	NA	N,N,N-Trimethyl-L-Alanyl-L-Proline Betaine	Unknown	NA	1
NA	NA	N-(Benzimidazol-2-Ylethyl)-2-(4-Hydroxyquinazolin-2-Ylthio)Acetamide	Unknown	NA	1
NA	NA	N-(9-Oxodecyl)Acetamide	Unknown	NA	0
NA	NA	N-(5-Chloro-2-Methoxyphenyl)-2-[9-(4-Methylphenyl)-6-Oxohydropurin-8-YlthioAc Etamide	Unknown	NA	0
NA	NA	N-(4-Methylphenyl)-2-(1-Methyl-3-Phenylthioindol-2-Yl)Acetamide	Unknown	NA	1
NA	NA	N-(4-Fluorophenyl)-2-(4-Hydroxyquinazolin-2-Ylthio)Acetamide	Unknown	NA	0
NA	NA	N-(4-Butylphenyl)(3,4,5-Trimethoxyphenyl)Carboxamide	Unknown	NA	1
HMDB0244280	NA	N(4)-Acetylsulfamethazine	Unknown	NA	0
NA	NA	N-(3-Methylthiophenyl)-2-[2-Oxo-4-(Pyrrolidinylcarbonyl)HydroquinolylAcetamid E	Unknown	NA	1
NA	NA	N-(3-Hydroxypropyl)-N-(3-Hydroxypropyl)Ethane-1,2-Diamide	Unknown	NA	1
HMDB0243607	NA	N-(3-Hydroxybutanoyl)Homoserine Lactone	Unknown	NA	0
NA	NA	N-(3-Cyanophenyl)-2-(4-Hydroxyquinazolin-2-Ylthio)Acetamide	Unknown	NA	1
NA	NA	N-(3-Chloro-4-Fluorophenyl)-2-{2-Oxo-4-[N-BenzylcarbamoylHydroquinolyl}Acetam Ide	Unknown	NA	1
HMDB0061384	NA	N-(3-Acetamidopropyl)Pyrrolidin-2-One	Unknown	NA	0
NA	NA	N-(2-Ethylphenyl)-2-(9-Methyl-6-Oxohydropurin-8-Ylthio)Acetamide	Unknown	NA	0
NA	NA	N-(2,6-Dimethylphenyl)-2-[2-Oxo-4-(N-Propylcarbamoyl)HydroquinolylAcetamide	Unknown	NA	1
NA	NA	N-(2,4-Dimethylphenyl)Formamide	Unknown	NA	0
NA	NA	N-(2,4-Dimethylphenyl)Acetamide	Unknown	NA	0
NA	NA	N-(((1S,9Ar)-Octahydro-1H-Quinolizin-1-Yl)Methyl)-5-(Pyridin-3-Yl)-1H-Pyrazole-3-Carboxamide	Unknown	NA	1
HMDB0040646	NA	Myrsinone	Food related	Food related(FooDB:FDB020439 HMDB:HMDB0040646)	0
NA	NA	Myristamine Oxide	Unknown	NA	0
HMDB0030386	C10160	Myosmine	Food related	Food related(FooDB:FDB002238 HMDB:HMDB0030386)	0
HMDB0258416	NA	Mycotoxin F2;Toxin F2	Unknown	NA	0
HMDB0015159	C20380	Mycophenolic Acid	Drug related; Environment	Drug related(DrugBank:DB01024 KEGG:C20380,D05096 T3DB:T3D2960); Environment(T3DB:T3D2960)	0
NA	NA	Mundulone	Unknown	NA	0
HMDB0245928	NA	M-Toluamide	Unknown	NA	1
HMDB0014363	C07663	Moxifloxacin	Drug related	Drug related(DrugBank:DB00218 KEGG:C07663,D08237)	0
HMDB0031581	C14452	Morpholine	Food related; Drug related	Food related(FooDB:FDB008207 HMDB:HMDB0031581); Drug related(DrugBank:DB13669)	0
HMDB0254871	NA	Monopropionylcadaverine	Unknown	NA	1
HMDB0060656	C16561	Monoethylglycinexylidide	Host; Microbiota	Microbiota(BIGG:meglyxyl)	0
HMDB0031232	NA	Monoethyl Carbonate	Food related	Food related(HMDB:HMDB0031232)	0
HMDB0002284	NA	Monoacetylcadaverine	Microbiota; Food related	Microbiota(HMDB:HMDB0002284); Food related(FooDB:FDB022947)	1
HMDB0013248	C03343	Mono-(2-Ethylhexyl)Phthalate	Food related	Food related(FooDB:FDB029358 T3DB:T3D3973)	0
HMDB0000227	C00418	Mevalonic Acid	Host; Microbiota; Food related; Drug related	Microbiota(BIGG:mev__R ChEBI:17710,36464 KEGG:C00418); Food related(FooDB:FDB005126 HMDB:HMDB0000227); Drug related(DrugBank:DB03518)	1
HMDB0028986	NA	Met-Val	Food related	Food related(FooDB:FDB112006)	0
HMDB0001932	C07202	Metoprolol	Food related; Drug related	Food related(FooDB:FDB022749); Drug related(DrugBank:DB00264 KEGG:C07202,D02358)	0
HMDB0014550	D01046	Methylrosanilinium Chloride	Drug related; Environment	Drug related(DrugBank:DB00406 KEGG:D01046 T3DB:T3D4821); Environment(T3DB:T3D4821)	0
HMDB0033112	NA	Methylpyrazine	Food related	Food related(FooDB:FDB011112 HMDB:HMDB0033112)	1
HMDB0000202	C02170	Methylmalonic Acid	Host; Microbiota; Food related; Drug related	Microbiota(KEGG:C02170); Food related(FooDB:FDB021905 T3DB:T3D4404); Drug related(DrugBank:DB04183)	0
HMDB0031864	C10454	Methyleugenol	Food related; Environment	Food related(FooDB:FDB008548 HMDB:HMDB0031864 T3DB:T3D4876); Environment(HMDB:HMDB0031864 T3DB:T3D4876)	1
NA	NA	Methylethyl 6-(3-Bromo-4-Hydroxy-5-Methoxyphenyl)-3-Ethyl-4-Methyl-2-Oxo-1,3,6 -Trihydropyrimidine-5-Carboxylate	Unknown	NA	0
HMDB0254636	NA	Methylene-Imidazole	Unknown	NA	0
HMDB0254615	NA	Methyl Syringate	Drug related	Drug related(DrugBank:DB08589)	0
NA	NA	Methyl 7-Deshydroxypyrogallin-4-Carboxylate	Unknown	NA	0
NA	NA	Methyl 4,5,6-Trihydroxy-3-(3-Methoxy-3-Oxoprop-1-En-2-Yl)Oxycyclohexene-1-Carboxylate	Unknown	NA	0
NA	NA	Methyl 4,10-Diacetyloxy-5,9-Dihydroxy-1,4A-Dimethyl-7-Propan-2-Yl-2,3,4,9,10,10A-Hexahydrophenanthrene-1-Carboxylate	Unknown	NA	1
NA	NA	Methyl 3-Phenyl-2-(Phenylformamido)Propanoate	Unknown	NA	1
NA	NA	Methyl 3-Oxo-2-[(3,4,5-Trimethoxyphenyl)MethyleneBenzo[BFuran-5-Carboxylate	Unknown	NA	0
HMDB0029750	NA	Methyl 2-Furoate	Food related	Food related(FooDB:FDB000952 HMDB:HMDB0029750)	0
NA	NA	Methyl 2-Ethyl-4-[(3R,4R,5S)-5-Hydroxy-4,5-Dimethyl-2-Oxooxolan-3-Yl-2-Methyl-3-Oxobutanoate	Unknown	NA	0
NA	NA	Methyl 2-Amino-4-(2-Bromophenyl)-5-Oxo-4H-Pyrano[3,2-CChromene-3-Carboxylate	Unknown	NA	0
NA	NA	Methyl 2-{[4-(Acetylamino)PhenylCarbonylamino}Acetate	Unknown	NA	0
NA	NA	Methyl 2-[(3-Formamido-2-Hydroxybenzoyl)Amino-3-Hydroxybutanoate	Unknown	NA	0
NA	NA	Methyl 19-Hydroxy-14,18-Dimethyl-12-Azahexacyclo[10.6.1.1,.0,.0,.0,Icosa-3,7(20)-Diene-3-Carboxylate	Unknown	NA	1
HMDB0301734	NA	Methoxyphenylacetic Acid	Food related	Food related(FooDB:FDB000318)	0
HMDB0041929	NA	Methoxyacetic Acid	Food related	Food related(FooDB:FDB111678)	0
HMDB0028977	NA	Methionyl-Leucine	Food related	Food related(FooDB:FDB111998)	1
HMDB0002005	C02989	Methionine Sulfoxide	Microbiota; Food related	Microbiota(BIGG:metsox_S__L ChEBI:17016 KEGG:C02989); Food related(FooDB:FDB022789 HMDB:HMDB0002005)	1
HMDB0000696	C00073	Methionine	Host; Microbiota; Food related; Drug related	Microbiota(BIGG:met__L ChEBI:16643 KEGG:C00073,D00019); Food related(FooDB:FDB012683 HMDB:HMDB0000696); Drug related(DrugBank:DB00134 KEGG:C00073,D00019)	0
HMDB0014798	C07934	Metaxalone	Drug related	Drug related(DrugBank:DB00660 KEGG:C07934,D00773)	1
HMDB0242427	NA	Mesaconine	Microbiota	Microbiota(ChEBI:132645)	1
HMDB0033752	C01198	Melilotic Acid	Food related	Food related(FooDB:FDB011887 HMDB:HMDB0033752)	0
HMDB0011730	C08243	Melezitose	Food related	Food related(FooDB:FDB001203)	0
HMDB0041922	C08737	Melamine	Food related	Food related(T3DB:T3D3520)	0
HMDB0000355	C03761	Meglutol	Food related; Drug related	Food related(FooDB:FDB004207 HMDB:HMDB0000355 T3DB:T3D4262); Drug related(DrugBank:DB04377 KEGG:C03761,D04897)	0
HMDB0243621	C10774	Matrine	Food related	Food related(T3DB:T3D4081)	0
HMDB0000169	C00159	Mannose	Host; Microbiota; Food related	Microbiota(BIGG:man); Food related(FooDB:FDB001202 HMDB:HMDB0000169)	0
HMDB0302955	NA	Manghaslin	Food related	Food related(FooDB:FDB007045)	0
NA	C08716	Malvidin	Food related	Food related(FooDB:FDB002713)	0
HMDB0001262	C01835	Maltotriose	Microbiota; Food related	Microbiota(BIGG:malttr); Food related(FooDB:FDB001196 HMDB:HMDB0001262)	0
HMDB0001296	C02052	Maltotetraose	Microbiota; Food related; Drug related	Microbiota(BIGG:maltttr ChEBI:143180,28460); Food related(FooDB:FDB001195 HMDB:HMDB0001296); Drug related(DrugBank:DB02237)	0
HMDB0011111	C00222	Malonic Semialdehyde	Host; Microbiota; Food related	Microbiota(BIGG:msa KEGG:C00222); Food related(FooDB:FDB027893 HMDB:HMDB0011111)	0
NA	NA	Maloformin B4	Unknown	NA	1
HMDB0000156	C00149	Malic Acid	Host; Microbiota; Food related	Microbiota(BIGG:mal__L ChEBI:15589,30797 HMDB:HMDB0000156 KEGG:C00149); Food related(FooDB:FDB012047 HMDB:HMDB0000156)	0
HMDB0304413	C09581	Magnoflorine	Food related	Food related(FooDB:FDB030988)	1
NA	NA	Macrosphelide D	Unknown	NA	0
HMDB0028964	NA	Lysylvaline	Food related	Food related(FooDB:FDB111987)	1
HMDB0028950	NA	Lysylglutamic Acid	Food related	Food related(FooDB:FDB111973)	1
HMDB0028955	NA	Lys-Leu	Food related	Food related(FooDB:FDB111978)	1
HMDB0000182	C00047	Lysine	Host; Microbiota; Food related; Drug related; Environment	Microbiota(BIGG:lys__L ChEBI:18019 KEGG:C00047,D02304); Food related(FooDB:FDB000474 HMDB:HMDB0000182 T3DB:T3D4248); Drug related(DrugBank:DB00123 KEGG:C00047,D02304 T3DB:T3D4248); Environment(HMDB:HMDB0000182 T3DB:T3D4248)	0
HMDB0253658	NA	Lysergol	Food related	Food related(T3DB:T3D3695)	0
NA	NA	L-Pyroglutamyl-L-Phenylalanine	Unknown	NA	1
NA	NA	LPS(19:0)	Unknown	NA	1
NA	NA	LPI(19:0)	Unknown	NA	0
HMDB0240261	NA	LPI(18:0)	Food related	Food related(HMDB:HMDB0240261)	1
HMDB0011152	NA	LPE(P-16:0)	Food related	Food related(FooDB:FDB027927 HMDB:HMDB0011152)	0
HMDB0011129	NA	LPE(18:0)	Microbiota; Food related	Microbiota(BIGG:2agpe180); Food related(FooDB:FDB027908 HMDB:HMDB0011129)	0
HMDB0011473	NA	LPE(16:0)	Microbiota; Food related	Microbiota(BIGG:2agpe160 ChEBI:131743); Food related(FooDB:FDB028189 HMDB:HMDB0011473)	0
HMDB0010385	C04230	LPC(18:1)	Host; Microbiota; Food related	Microbiota(KEGG:C04230); Food related(FooDB:FDB027536 HMDB:HMDB0010385)	0
HMDB0010384	C04230	LPC(18:0)	Host; Microbiota; Food related	Microbiota(KEGG:C04230); Food related(FooDB:FDB027535 HMDB:HMDB0010384)	0
HMDB0240262	NA	LPC(16:0)	Food related	Food related(HMDB:HMDB0240262)	0
HMDB0014372	C07074	Lovastatin	Drug related; Environment	Drug related(DrugBank:DB00227 KEGG:C07074,D00359 T3DB:T3D4787); Environment(T3DB:T3D4787)	0
HMDB0033675	C04020	L-Lysopine	Food related	Food related(FooDB:FDB011778 HMDB:HMDB0033675)	1
HMDB0000761	C03990	Lithocholic Acid	Food related	Food related(FooDB:FDB022230 HMDB:HMDB0000761 T3DB:T3D4963)	0
HMDB0033923	C16434	L-Isoleucinel-Isoleucine	Food related	Food related(FooDB:FDB012397 HMDB:HMDB0033923)	0
HMDB0000172	C00407	L-Isoleucine	Host; Microbiota; Food related; Drug related; Environment	Microbiota(BIGG:ile__L ChEBI:17191 KEGG:C00407,D00065); Food related(FooDB:FDB012397 HMDB:HMDB0000172 T3DB:T3D4364); Drug related(DrugBank:DB00167 KEGG:C00407,D00065 T3DB:T3D4364); Environment(HMDB:HMDB0000172 T3DB:T3D4364)	0
HMDB0253897	NA	L-Isoleucinamide	Unknown	NA	0
NA	NA	Lignocaine N-Oxide	Unknown	NA	0
HMDB0014426	C07073	Lidocaine	Host; Microbiota; Drug related; Environment	Microbiota(BIGG:lido); Drug related(DrugBank:DB00281 KEGG:C07073,D00358 T3DB:T3D2735); Environment(HMDB:HMDB0014426 T3DB:T3D2735)	0
HMDB0033319	C10650	Licarin A	Food related	Food related(FooDB:FDB011346 HMDB:HMDB0033319)	0
HMDB0003466	C01040	L-Gulonolactone	Host; Microbiota; Food related	Microbiota(KEGG:C01040); Food related(FooDB:FDB023179)	0
HMDB0006372	NA	L-Glyceric Acid	Food related	Food related(FooDB:FDB023907)	0
HMDB0000641	C00064	L-Glutamine	Host; Microbiota; Food related; Drug related; Environment	Microbiota(BIGG:gln__L ChEBI:18050 KEGG:C00064,D00015); Food related(FooDB:FDB030965 HMDB:HMDB0000641 T3DB:T3D4319); Drug related(DrugBank:DB00130 KEGG:C00064,D00015 T3DB:T3D4319); Environment(HMDB:HMDB0000641 T3DB:T3D4319)	0
HMDB0000181	C00355	Levodopa	Host; Microbiota; Food related; Drug related; Environment	Microbiota(KEGG:C00355,D00059); Food related(FooDB:FDB000567 HMDB:HMDB0000181 T3DB:T3D3028); Drug related(DrugBank:DB01235 KEGG:C00355,D00059 T3DB:T3D3028); Environment(HMDB:HMDB0000181)	0
HMDB0028942	NA	Leu-Val	Food related	Food related(FooDB:FDB111965)	1
HMDB0028940	NA	Leu-Trp	Food related	Food related(FooDB:FDB098213)	1
HMDB0028939	NA	Leu-Thr	Food related	Food related(FooDB:FDB111963)	1
HMDB0028931	NA	Leu-His	Food related	Food related(FooDB:FDB111958)	1
HMDB0028928	NA	Leu-Glu	Food related	Food related(FooDB:FDB111955)	1
HMDB0028941	NA	Leucyl-Tyrosine	Food related	Food related(FooDB:FDB111964)	1
HMDB0028934	NA	Leucyl-Lysine	Food related	Food related(FooDB:FDB111961)	1
HMDB0028932	NA	Leucyl-Isoleucine	Food related	Food related(FooDB:FDB111959)	1
HMDB0028927	NA	Leucyl-Glutamine	Food related	Food related(FooDB:FDB111954)	1
HMDB0028928	NA	Leucyl-Glutamate	Food related	Food related(FooDB:FDB111955)	1
HMDB0028924	NA	Leucyl-Asparagine	Food related	Food related(FooDB:FDB111952)	1
HMDB0028922	NA	Leucyl-Alanine	Food related	Food related(FooDB:FDB111950)	1
HMDB0000687	C16439	Leucine	Microbiota; Food related; Drug related; Environment	Microbiota(BIGG:leu__L ChEBI:15603 KEGG:C00123,D00030); Food related(FooDB:FDB000899 HMDB:HMDB0000687 T3DB:T3D4365); Drug related(DrugBank:DB00149 KEGG:C00123,D00030 T3DB:T3D4365); Environment(HMDB:HMDB0000687)	1
HMDB0014623	D04687	Lenalidomide	Drug related	Drug related(DrugBank:DB00480 KEGG:D04687)	1
NA	NA	Lauryldiethanolamine	Unknown	NA	0
NA	NA	Lauramine Oxide	Microbiota; Drug related	Microbiota(ChEBI:131762); Drug related(DrugBank:DB04147)	0
HMDB0000168	C00152	L-Asparagine	Host; Microbiota; Food related; Drug related; Environment	Microbiota(BIGG:asn__L ChEBI:17196 KEGG:C00152); Food related(FooDB:FDB000787 HMDB:HMDB0000168 T3DB:T3D4362); Drug related(DrugBank:DB00174 T3DB:T3D4362); Environment(HMDB:HMDB0000168)	0
HMDB0000510	C00956	L-Alpha-Aminoadipate	Host; Microbiota; Food related	Microbiota(BIGG:L2aadp KEGG:C00956); Food related(FooDB:FDB021812 HMDB:HMDB0000510 T3DB:T3D4259)	0
HMDB0000190	C00186	Lactic Acid	Host; Microbiota; Food related; Drug related	Microbiota(BIGG:lac__L ChEBI:16651,422 HMDB:HMDB0000190 KEGG:C00186); Food related(FooDB:FDB003294 HMDB:HMDB0000190 T3DB:T3D4253); Drug related(DrugBank:DB14475)	0
NA	NA	Lactarorufin B	Unknown	NA	0
NA	NA	L-3-Hydroxy-N-Methylmorphinan Bitartrate	Unknown	NA	1
HMDB0005768	C02993	Kyotorphin	Food related	Food related(FooDB:FDB023758)	1
HMDB0000684	C00328	Kynurenine	Host; Microbiota; Food related; Drug related	Microbiota(BIGG:Lkynr ChEBI:16946 KEGG:C00328); Food related(FooDB:FDB022181 HMDB:HMDB0000684); Drug related(DrugBank:DB02070)	1
NA	NA	Koninginin E	Unknown	NA	1
HMDB0032923	C14516	Kojic Acid	Microbiota; Food related; Drug related; Environment	Microbiota(ChEBI:43572 HMDB:HMDB0032923 T3DB:T3D3769); Food related(FooDB:FDB010906 HMDB:HMDB0032923 T3DB:T3D3769); Drug related(DrugBank:DB01759); Environment(HMDB:HMDB0032923 T3DB:T3D3769)	0
HMDB0036790	C16983	Kobusone	Food related	Food related(FooDB:FDB015734 HMDB:HMDB0036790)	0
HMDB0253801	NA	Kinetin Riboside	Unknown	NA	0
HMDB0015418	C12662	Josamycin	Drug related	Drug related(DrugBank:DB01321 KEGG:C12662,D01235)	1
HMDB0253690	C05334	Isosakuranetin	Food related	Food related(FooDB:FDB000610)	1
NA	NA	Isoprenylhydroquinone Glucoside	Unknown	NA	0
HMDB0033854	C21402	Isoprenyl Alcohol	Microbiota; Food related	Microbiota(ChEBI:132752); Food related(FooDB:FDB012034 HMDB:HMDB0033854)	0
HMDB0031195	C14743	Isophorone	Food related	Food related(FooDB:FDB003216 HMDB:HMDB0031195)	0
HMDB0015086	C07054	Isoniazid	Host; Microbiota; Food related; Drug related; Environment	Microbiota(KEGG:C07054,D00346); Food related(FooDB:FDB029229 T3DB:T3D4777); Drug related(DrugBank:DB00951 KEGG:C07054,D00346 T3DB:T3D4777); Environment(T3DB:T3D4777)	0
HMDB0028916	NA	Isoleucylserine	Food related	Food related(FooDB:FDB111944)	1
HMDB0011174	NA	Isoleucylproline	Food related	Food related(FooDB:FDB027946)	1
HMDB0028914	NA	Isoleucyl-Phenylalanine	Food related	Food related(FooDB:FDB111943)	1
HMDB0028913	NA	Isoleucylmethionine	Food related	Food related(FooDB:FDB111942)	0
HMDB0028911	NA	Isoleucylleucine	Food related	Food related(FooDB:FDB111940)	1
NA	NA	Isoleucyl-Isoleucyl-Lysine	Unknown	NA	1
NA	NA	Isoleucyl-Glycyl-Isoleucine	Unknown	NA	0
HMDB0028903	NA	Isoleucylaspartate	Food related	Food related(FooDB:FDB111932)	1
HMDB0028901	NA	Isoleucyl-Arginine	Food related	Food related(FooDB:FDB111930)	1
HMDB0028901	NA	Isoleucylarginine	Food related	Food related(FooDB:FDB111930)	1
HMDB0028900	NA	Isoleucyl-Alanine	Food related	Food related(FooDB:FDB111929)	0
HMDB0253648	NA	Isoindoline	Unknown	NA	0
HMDB0000333	NA	Isohomovanillic Acid	Food related	Food related(FooDB:FDB021958)	0
NA	C08432	Isoguanosine	Unknown	NA	0
NA	NA	Isofraxoside	Unknown	NA	1
NA	NA	Isoevernic Acid	Unknown	NA	0
HMDB0000193	C00311	Isocitric Acid	Host; Microbiota; Food related; Drug related	Microbiota(BIGG:icit ChEBI:16087,30887 KEGG:C00311); Food related(FooDB:FDB003281 HMDB:HMDB0000193); Drug related(DrugBank:DB01727)	0
HMDB0015163	C07469	Irbesartan	Drug related	Drug related(DrugBank:DB01029 KEGG:C07469,D00523)	0
HMDB0000195	C00294	Inosine	Host; Microbiota; Food related; Drug related	Microbiota(BIGG:ins ChEBI:17596 KEGG:C00294,D00054); Food related(FooDB:FDB011802 HMDB:HMDB0000195); Drug related(DrugBank:DB04335 KEGG:C00294,D00054)	1
HMDB0000671	C02043	Indole-3-Lactic Acid	Microbiota; Food related; Drug related	Microbiota(HMDB:HMDB0000671); Food related(FooDB:FDB022174); Drug related(DrugBank:DB07060)	0
HMDB0029737	C08493	Indole-3-Carbaldehyde	Microbiota; Food related	Microbiota(ChEBI:28238 HMDB:HMDB0029737); Food related(FooDB:FDB000934 HMDB:HMDB0029737)	1
HMDB0000734	C21283	Indole-3-Acrylic Acid	Microbiota; Food related	Microbiota(HMDB:HMDB0000734); Food related(FooDB:FDB000938 HMDB:HMDB0000734)	0
HMDB0000197	C00954	Indole-3-Acetic Acid	Host; Microbiota; Food related; Drug related; Environment	Microbiota(BIGG:ind3ac HMDB:HMDB0000197 KEGG:C00954); Food related(FooDB:FDB030920 HMDB:HMDB0000197 T3DB:T3D4152); Drug related(DrugBank:DB07950); Environment(T3DB:T3D4152)	0
HMDB0001190	C00637	Indole-3-Acetaldehyde	Host; Microbiota; Food related	Microbiota(BIGG:id3acald ChEBI:18086 KEGG:C00637); Food related(FooDB:FDB013950 HMDB:HMDB0001190)	1
HMDB0000738	C00463	Indole	Microbiota; Food related; Drug related	Microbiota(BIGG:indole ChEBI:16881 HMDB:HMDB0000738 KEGG:C00463); Food related(FooDB:FDB012008 HMDB:HMDB0000738); Drug related(DrugBank:DB04532)	1
HMDB0059837	NA	Indane	Unknown	NA	0
NA	NA	Inaequalisine_A	Unknown	NA	0
HMDB0000175	C00130	IMP	Host; Microbiota; Food related; Drug related	Microbiota(BIGG:imp ChEBI:17202 KEGG:C00130); Food related(FooDB:FDB021901 HMDB:HMDB0000175); Drug related(DrugBank:DB04566)	0
HMDB0253423	NA	Imidazooxazole	Unknown	NA	0
HMDB0004363	C06195	Imidazolone	Food related	Food related(FooDB:FDB023367)	0
HMDB0002271	C20522	Imidazolepropionic Acid	Microbiota; Food related	Microbiota(KEGG:C20522); Food related(FooDB:FDB012461)	1
HMDB0003905	C05130	Imidazole-4-Acetaldehyde	Host; Microbiota; Food related	Microbiota(BIGG:im4act KEGG:C05130); Food related(FooDB:FDB030915 HMDB:HMDB0003905)	0
NA	NA	Imazapic	Unknown	NA	1
HMDB0253404	C18598	Imazamox	Unknown	NA	1
HMDB0303758	NA	Icariside D1	Food related	Food related(FooDB:FDB020703)	1
HMDB0000157	C00262	Hypoxanthine	Host; Microbiota; Food related; Drug related	Microbiota(BIGG:hxan ChEBI:17368 KEGG:C00262); Food related(FooDB:FDB003949 HMDB:HMDB0000157 T3DB:T3D4150); Drug related(DrugBank:DB04076)	0
NA	NA	Hypothallin	Unknown	NA	0
HMDB0061115	C09213	Hypaphorine	Microbiota	Microbiota(ChEBI:5832)	0
HMDB0059622	C03081	Hymecromone	Drug related	Drug related(DrugBank:DB07118 KEGG:C03081,D00170)	0
NA	NA	Hydroxysuberic Acid	Unknown	NA	0
HMDB0000763	C05635	Hydroxyindoleacetic Acid	Host; Microbiota; Food related	Microbiota(HMDB:HMDB0000763 KEGG:C05635); Food related(FooDB:FDB001403 HMDB:HMDB0000763)	0
HMDB0006961	C05235	Hydroxyacetone	Microbiota; Food related	Microbiota(BIGG:acetol ChEBI:27957 KEGG:C05235); Food related(FooDB:FDB012041 HMDB:HMDB0006961)	1
HMDB0242615	C10696	Hydroquinidine	Drug related	Drug related(KEGG:C10696,D08048)	1
NA	NA	Hwesasxx	Unknown	NA	1
HMDB0253233	C09866	Huperzine B	Drug related	Drug related(DrugBank:DB03348)	0
NA	NA	Homopterocarpin	Unknown	NA	0
HMDB0028898	NA	Histidylvaline	Food related	Food related(FooDB:FDB111927)	1
HMDB0028897	NA	Histidyltyrosine	Food related	Food related(FooDB:FDB111926)	1
HMDB0028893	NA	Histidylproline	Food related	Food related(FooDB:FDB111922)	1
HMDB0028888	NA	Histidylisoleucine	Food related	Food related(FooDB:FDB111917)	1
HMDB0253179	C05010	Histidiylleucine	Food related	Food related(FooDB:FDB111918)	0
HMDB0000177	C00135	Histidine	Host; Microbiota; Food related; Drug related; Environment	Microbiota(BIGG:his__L ChEBI:15971 KEGG:C00135,D00032); Food related(FooDB:FDB011856 HMDB:HMDB0000177 T3DB:T3D4363); Drug related(DrugBank:DB00117 KEGG:C00135,D00032 T3DB:T3D4363); Environment(HMDB:HMDB0000177 T3DB:T3D4363)	0
HMDB0000714	C01586	Hippuric Acid	Microbiota; Food related; Drug related; Environment	Microbiota(BIGG:bgly HMDB:HMDB0000714); Food related(FooDB:FDB001819 HMDB:HMDB0000714 T3DB:T3D4159); Drug related(DrugBank:DB16842); Environment(T3DB:T3D4159)	0
NA	C02886	Hexylglutathione	Drug related	Drug related(DrugBank:DB04132)	1
NA	NA	Hexyl 2-[(4-Hydroxy-2-Oxo-3-Hydroquinolyl)CarbonylaminoBenzoate	Unknown	NA	1
NA	NA	Hex-Naringenin (Put)	Unknown	NA	1
HMDB0061822	NA	Hexaethylene Glycol	Unknown	NA	0
HMDB0000672	C19615	Hexadecanedioic Acid	Food related	Food related(FooDB:FDB003049 HMDB:HMDB0000672)	0
HMDB0012273	NA	Hexadecanamide	Food related	Food related(FooDB:FDB011671 HMDB:HMDB0012273)	0
NA	NA	Herbasterol	Unknown	NA	0
HMDB0062295	NA	Hepes	Drug related	Drug related(DrugBank:DB16872)	1
HMDB0030311	C06538	Harmine	Microbiota; Food related; Drug related	Microbiota(ChEBI:28121); Food related(HMDB:HMDB0030311); Drug related(DrugBank:DB07919)	0
HMDB0029838	C06537	Harmalol	Food related	Food related(FooDB:FDB001053 HMDB:HMDB0029838)	0
HMDB0030310	C06536	Harmaline	Food related; Drug related	Food related(HMDB:HMDB0030310); Drug related(DrugBank:DB13875)	0
HMDB0029488	NA	Gummosin	Food related	Food related(FooDB:FDB000620 HMDB:HMDB0029488)	1
HMDB0000133	C00387	Guanosine	Host; Microbiota; Food related; Drug related	Microbiota(BIGG:gsn ChEBI:16750 KEGG:C00387); Food related(FooDB:FDB003632 HMDB:HMDB0000133); Drug related(DrugBank:DB02857)	0
HMDB0000132	C00242	Guanine	Host; Microbiota; Food related; Drug related	Microbiota(BIGG:gua ChEBI:16235 KEGG:C00242); Food related(FooDB:FDB004222 HMDB:HMDB0000132); Drug related(DrugBank:DB02377)	0
NA	C09103	Grayanotoxin I	Food related	Food related(T3DB:T3D3090)	1
NA	NA	Graveolide	Unknown	NA	0
HMDB0252931	C08901	Gracillin	Unknown	NA	1
HMDB0252911	C17816	Gomisin D	Food related	Food related(FooDB:FDB029991)	0
HMDB0001397	C00144	GMP	Host; Microbiota; Food related; Drug related	Microbiota(BIGG:gmp ChEBI:17345 KEGG:C00144); Food related(FooDB:FDB030896); Drug related(DrugBank:DB01972)	0
HMDB0028853	NA	Gly-Tyr	Food related; Drug related	Food related(FooDB:FDB111885); Drug related(DrugBank:DB15991)	1
HMDB0028854	NA	Glycylvaline	Food related	Food related(FooDB:FDB111886)	1
HMDB0000721	NA	Glycylproline	Food related	Food related(FooDB:FDB022202)	1
HMDB0028847	NA	Glycylmethionine	Food related	Food related(FooDB:FDB111882)	1
HMDB0028848	NA	Glycyl-L-Phenylalanine	Microbiota; Food related	Microbiota(BIGG:gly_phe__L); Food related(FooDB:FDB098201)	1
HMDB0000759	C02155	Glycylleucine	Food related	Food related(FooDB:FDB022228)	1
HMDB0000128	C00581	Glycocyamine	Host; Microbiota; Food related; Drug related	Microbiota(ChEBI:16344 KEGG:C00581); Food related(FooDB:FDB005417 T3DB:T3D4149); Drug related(DrugBank:DB02751)	0
HMDB0242115	NA	Glyceryl Monolinoleate	Unknown	NA	0
HMDB0000086	C00670	Glycerol-3-Phosphocholine	Host; Microbiota; Food related; Drug related	Microbiota(BIGG:g3pc ChEBI:16870 KEGG:C00670,D07349); Food related(FooDB:FDB030952 HMDB:HMDB0000086); Drug related(DrugBank:DB04660 KEGG:C00670,D07349)	0
HMDB0000131	C00116	Glycerol	Host; Microbiota; Food related; Drug related; Environment	Microbiota(BIGG:glyc ChEBI:17754 KEGG:C00116,D00028); Food related(FooDB:FDB000756 HMDB:HMDB0000131 T3DB:T3D4360); Drug related(DrugBank:DB09462 KEGG:C00116,D00028); Environment(HMDB:HMDB0000131 T3DB:T3D4360)	1
NA	NA	Glu-Val-Phe	Unknown	NA	0
HMDB0028829	NA	Glu-Thr	Food related	Food related(FooDB:FDB111871)	1
HMDB0000125	C00051	Glutathione (Reduced)	Host; Microbiota; Food related; Drug related; Environment	Microbiota(BIGG:gthrd ChEBI:16856 KEGG:C00051,C02471,D00014); Food related(FooDB:FDB001498 HMDB:HMDB0000125 T3DB:T3D4352); Drug related(DrugBank:DB00143 KEGG:C00051,C02471,D00014 T3DB:T3D4352); Environment(HMDB:HMDB0000125)	0
HMDB0003337	C00127	Glutathione (Oxidized)	Host; Microbiota; Food related; Drug related	Microbiota(BIGG:gthox ChEBI:167606,17858 KEGG:C00127,D00031); Food related(FooDB:FDB023147 HMDB:HMDB0003337); Drug related(DrugBank:DB03310 KEGG:C00127,D00031)	1
HMDB0000661	C00489	Glutaric Acid	Microbiota; Food related; Drug related	Microbiota(BIGG:glutar HMDB:HMDB0000661 KEGG:C00489); Food related(FooDB:FDB001477 HMDB:HMDB0000661 T3DB:T3D4359); Drug related(DrugBank:DB03553)	1
HMDB0028832	NA	Glutamylvaline	Food related	Food related(FooDB:FDB111873)	1
HMDB0028831	NA	Glutamyltyrosine	Food related	Food related(FooDB:FDB005571)	1
HMDB0028830	NA	Glutamyltryptophan	Food related; Drug related	Food related(FooDB:FDB111872); Drug related(DrugBank:DB05779)	1
HMDB0028828	NA	Glutamylserine	Food related	Food related(FooDB:FDB111870)	1
HMDB0029156	NA	Glutamylphenylalanine	Unknown	NA	1
HMDB0004207	C04700	Glutamyllysine	Microbiota; Food related	Microbiota(BIGG:uAgl); Food related(FooDB:FDB023334)	1
HMDB0028801	NA	Glutaminylleucine	Food related	Food related(FooDB:FDB111849)	1
HMDB0003423	C00303	Glutamine	Microbiota; Food related; Drug related	Microbiota(KEGG:C00819); Food related(FooDB:FDB023171); Drug related(DrugBank:DB02174)	1
HMDB0000148	C00025	Glutamic Acid	Host; Microbiota; Food related; Drug related	Microbiota(BIGG:glu__L ChEBI:16015 KEGG:C00025,D00007); Food related(FooDB:FDB012535 HMDB:HMDB0000148 T3DB:T3D4296); Drug related(DrugBank:DB00142 KEGG:C00025,D00007)	0
HMDB0006355	C02670	Glucurolactone	Host; Microbiota; Food related; Drug related	Microbiota(BIGG:glcurn KEGG:C02670,D01800); Food related(FooDB:FDB023903); Drug related(KEGG:C02670,D01800)	0
HMDB0038341	NA	Glucosylisomaltol	Food related	Food related(FooDB:FDB017676 HMDB:HMDB0038341)	1
HMDB0000592	C04132	Glucosamine 6-O-Sulfate	Food related	Food related(FooDB:FDB022132)	0
HMDB0000625	C00257	Gluconic Acid	Host; Microbiota; Food related; Drug related	Microbiota(BIGG:glcn ChEBI:18391,33198 HMDB:HMDB0000625 KEGG:C00257); Food related(FooDB:FDB001980 T3DB:T3D1157); Drug related(DrugBank:DB13180)	0
HMDB0035749	C08944	Ginsenoside Re	Food related	Food related(FooDB:FDB014479 HMDB:HMDB0035749)	0
HMDB0062745	C21203	Geranyl Phosphate	Food related	Food related(HMDB:HMDB0062745)	0
HMDB0036103	C16461	Geranic Acid	Microbiota; Food related	Microbiota(KEGG:C16461); Food related(FooDB:FDB021853 HMDB:HMDB0036103)	0
HMDB0014936	C11334	Gentamicin Sulfate	Drug related	Drug related(DrugBank:DB00798)	0
HMDB0003464	C01035	Gamma-Guanidinobutyric Acid	Host; Microbiota; Food related	Microbiota(BIGG:4gudbutn ChEBI:15728 KEGG:C01035); Food related(FooDB:FDB005408 HMDB:HMDB0003464)	0
HMDB0011741	NA	Gamma-Glutamyltyrosine	Food related	Food related(FooDB:FDB000717 HMDB:HMDB0011741)	1
HMDB0034367	NA	Gamma-Glutamylmethionine	Food related	Food related(FooDB:FDB012741 HMDB:HMDB0034367)	1
HMDB0011171	NA	Gamma-Glutamylleucine	Food related	Food related(FooDB:FDB003617 HMDB:HMDB0011171)	0
HMDB0011170	NA	Gamma-Glutamylisoleucine	Food related	Food related(FooDB:FDB000482 HMDB:HMDB0011170)	1
HMDB0000212	C01074	Galnac	Food related; Drug related	Food related(FooDB:FDB031022 HMDB:HMDB0000212); Drug related(DrugBank:DB03567)	0
HMDB0254590	NA	Gallic Acid Methyl Ester	Food related	Food related(FooDB:FDB000663)	0
HMDB0005807	C01424	Gallic Acid	Microbiota; Food related	Microbiota(BIGG:ga HMDB:HMDB0005807 KEGG:C01424); Food related(FooDB:FDB000662 HMDB:HMDB0005807)	0
HMDB0029521	C10044	Galangin	Food related	Food related(FooDB:FDB000657 HMDB:HMDB0029521)	1
HMDB0000645	C00446	Galactose 1-Phosphate	Host; Microbiota; Food related; Drug related	Microbiota(BIGG:gal1p ChEBI:17973 KEGG:C00446); Food related(FooDB:FDB001159 HMDB:HMDB0000645); Drug related(DrugBank:DB02317)	0
HMDB0000112	C00334	GABA	Host; Microbiota; Food related; Drug related; Environment	Microbiota(BIGG:4abut ChEBI:16865,30566 HMDB:HMDB0000112 KEGG:C00334,D00058); Food related(FooDB:FDB030489 HMDB:HMDB0000112 T3DB:T3D4250); Drug related(DrugBank:DB02530 KEGG:C00334,D00058); Environment(HMDB:HMDB0000112)	0
HMDB0000439	NA	Furoylglycine	Microbiota; Food related	Microbiota(HMDB:HMDB0000439); Food related(FooDB:FDB022046)	0
HMDB0094691	C17602	Furanone A	Unknown	NA	0
NA	NA	Fumonisin Py2	Unknown	NA	1
HMDB0015082	D01161	Fulvestrant	Food related; Drug related; Environment	Food related(HMDB:HMDB0015082); Drug related(DrugBank:DB00947 KEGG:D01161 T3DB:T3D4757); Environment(T3DB:T3D4757)	0
HMDB0252461	NA	Forsythoside B	Unknown	NA	1
HMDB0004089	C05653	Formylanthranilic Acid	Host; Microbiota; Food related	Microbiota(KEGG:C05653); Food related(FooDB:FDB023309)	1
HMDB0015118	C07805	Formoterol	Drug related	Drug related(DrugBank:DB00983 KEGG:C07805,D07990)	1
HMDB0252436	C18604	Forchlorfenuron	Environment	Environment(T3DB:T3D4513)	0
HMDB0252399	C10967	Fluperlapine	Unknown	NA	1
HMDB0005030	C06999	Fexofenadine	Food related; Drug related; Environment	Food related(FooDB:FDB023597 T3DB:T3D2938); Drug related(DrugBank:DB00950 KEGG:C06999,D07958 T3DB:T3D2938); Environment(T3DB:T3D2938)	0
HMDB0029365	C02717	Feruloyltyramine	Microbiota; Food related	Microbiota(ChEBI:17818); Food related(FooDB:FDB000432 HMDB:HMDB0029365)	1
HMDB0252200	C06996	Fenfluramine	Drug related	Drug related(DrugBank:DB00574 KEGG:C06996,D07945)	1
HMDB0036438	NA	Fasciculic Acid B	Food related	Food related(FooDB:FDB015325 HMDB:HMDB0036438)	1
NA	NA	Ethyl 4-[2-(9-Methyl-6-Oxohydropurin-8-Ylthio)AcetylaminoBenzoate	Unknown	NA	1
NA	NA	Ethyl 3-{N-[2-(N-Phenylcarbamoyl)PhenylCarbamoyl}Propanoate	Unknown	NA	0
HMDB0038017	NA	Ethyl 2-Phenyl-3-Furancarboxylate	Food related	Food related(FooDB:FDB017225 HMDB:HMDB0038017)	1
NA	NA	Ethyl 2-Amino-6-(Hydroxymethyl)-8-Oxo-4-(3-Pyridyl)-4H-Pyrano[3,2-BPyran-3-Ca Rboxylate	Unknown	NA	1
NA	NA	Ethyl 2-Amino-4-(2,6-Dichlorophenyl)-6-(Hydroxymethyl)-8-Oxo-4H-Pyrano[3,2-BP Yran-3-Carboxylate	Unknown	NA	0
NA	NA	Ethyl 2-{3-Methyl-7-[(3-Methylphenyl)Methyl-2,6-Dioxo-1,3,7-Trihydropurin-8-Y Lthio}Acetate	Unknown	NA	0
HMDB0014474	C06984	Ethambutol	Drug related	Drug related(DrugBank:DB00330 KEGG:C06984,D07925)	0
HMDB0000145	C00468	Estrone	Host; Microbiota; Food related; Drug related	Microbiota(KEGG:C00468,D00067); Food related(FooDB:FDB012798 HMDB:HMDB0000145 T3DB:T3D4746); Drug related(DrugBank:DB00655 KEGG:C00468,D00067 T3DB:T3D4746)	0
HMDB0014344	C01912	Erythromycin	Microbiota; Food related; Drug related; Environment	Microbiota(KEGG:C01912,D00140); Food related(FooDB:FDB015812); Drug related(DrugBank:DB00199 KEGG:C01912,D00140 T3DB:T3D4764); Environment(HMDB:HMDB0014344 T3DB:T3D4764)	1
HMDB0244507	NA	Erucamide	Unknown	NA	0
HMDB0005810	C05631	Eriodictyol	Microbiota; Food related	Microbiota(KEGG:C05631); Food related(FooDB:FDB011936 HMDB:HMDB0005810)	0
HMDB0003045	C05570	Ergothioneine	Microbiota; Food related	Microbiota(ChEBI:4828 KEGG:C05570); Food related(FooDB:FDB004217 HMDB:HMDB0003045)	0
HMDB0030604	C10289	Epsilon-Viniferin	Food related	Food related(FooDB:FDB014122 HMDB:HMDB0030604)	0
HMDB0000068	C00788	Epinephrine	Host; Microbiota; Food related; Drug related	Microbiota(HMDB:HMDB0000068 KEGG:C00788,D00095); Food related(FooDB:FDB021889); Drug related(DrugBank:DB00668 KEGG:C00788,D00095)	0
NA	NA	Epiequisetin	Unknown	NA	1
HMDB0002899	C10788	Ellagic Acid	Food related; Drug related	Food related(FooDB:FDB012575 HMDB:HMDB0002899); Drug related(DrugBank:DB08846)	1
HMDB0006548	C10858	Ecgonine	Food related; Drug related	Food related(FooDB:FDB023968); Drug related(DrugBank:DB01525)	0
HMDB0001227	C00364	dTMP	Host; Microbiota; Food related; Drug related	Microbiota(BIGG:dtmp ChEBI:17013 KEGG:C00364); Food related(FooDB:FDB030840 HMDB:HMDB0001227); Drug related(DrugBank:DB01643)	1
HMDB0005960	NA	D-Pipecolic acid	Food related	Food related(FooDB:FDB023791)	0
HMDB0000609	C00355	DOPA	Host; Microbiota; Food related; Drug related	Microbiota(KEGG:C00355); Food related(FooDB:FDB022140); Drug related(KEGG:C00355)	0
NA	NA	Dodecyl sulfate	Drug related	Drug related(DrugBank:DB03967)	0
HMDB0000623	C02678	Dodecanedioic acid	Food related	Food related(FooDB:FDB022148 HMDB:HMDB0000623)	0
HMDB0251566	C13831	Dodecanamide	Unknown	NA	0
HMDB0245221	C18653	DNOC	Unknown	NA	0
HMDB0000163	C00208	D-Maltose	Host; Microbiota; Food related; Drug related	Microbiota(BIGG:malt KEGG:C00208); Food related(FooDB:FDB001193 HMDB:HMDB0000163); Drug related(KEGG:C00208)	0
HMDB0013773	C01570	D-Leucine	Microbiota; Food related; Drug related	Microbiota(ChEBI:28225); Food related(FooDB:FDB111645); Drug related(DrugBank:DB01746)	0
HMDB0004814	NA	Dipropyl Ketone	Food related	Food related(FooDB:FDB008059)	0
HMDB0251427	C14227	Dioctyl Phthalate	Food related	Food related(FooDB:FDB004316 T3DB:T3D3641)	0
HMDB0302261	NA	Di-N-Propylamine	Food related	Food related(FooDB:FDB003929)	0
NA	C18785	Dinitramine	Unknown	NA	1
HMDB0002151	C11143	Dimethyl Sulfoxide	Microbiota; Food related; Drug related; Environment	Microbiota(BIGG:dmso ChEBI:28262 KEGG:C11143,D01043); Food related(FooDB:FDB000764 HMDB:HMDB0002151 T3DB:T3D2982); Drug related(DrugBank:DB01093 KEGG:C11143,D01043 T3DB:T3D2982); Environment(T3DB:T3D2982)	0
HMDB0004983	C11142	Dimethyl Sulfone	Microbiota; Food related; Drug related	Microbiota(HMDB:HMDB0004983 KEGG:C11142); Food related(FooDB:FDB006725 HMDB:HMDB0004983); Drug related(DrugBank:DB14090)	0
HMDB0251388	C11233	Dimethyl Phthalate	Food related; Drug related	Food related(T3DB:T3D3652); Drug related(DrugBank:DB13336)	0
NA	NA	Dimethyl Myristamine	Unknown	NA	0
NA	NA	Dimethenamide Esa	Unknown	NA	0
HMDB0000397	C00196	Dihydroxy-Benzoic Acid	Microbiota; Food related; Drug related	Microbiota(BIGG:23dhb KEGG:C00196); Food related(FooDB:FDB012200 HMDB:HMDB0000397); Drug related(DrugBank:DB01672)	1
HMDB0000076	C00429	Dihydrouracil	Host; Microbiota; Food related; Drug related	Microbiota(BIGG:56dura ChEBI:15901 KEGG:C00429); Food related(FooDB:FDB030556 HMDB:HMDB0000076); Drug related(DrugBank:DB01849)	0
HMDB0038457	C16952	Dihydrocapsaicin	Food related	Food related(FooDB:FDB017816 HMDB:HMDB0038457)	0
HMDB0033840	NA	Dihydro-5-Methyl-2(3H)-Furanone	Food related	Food related(FooDB:FDB012014 HMDB:HMDB0033840)	1
HMDB0039721	C02273	Digalacturonate	Microbiota; Food related	Microbiota(HMDB:HMDB0039721 KEGG:C02273,G02614); Food related(FooDB:FDB019359 HMDB:HMDB0039721)	0
NA	NA	Difluoro(Perfluoromethoxy)Acetic Acid	Unknown	NA	0
HMDB0250930	C10935	Diethyltoluamide	Drug related	Drug related(DrugBank:DB11282 KEGG:C10935,D02379)	0
HMDB0094660	C14175	Diethyl Phthalate	Food related; Drug related	Food related(T3DB:T3D3638); Drug related(KEGG:C14175,D03804)	0
NA	NA	Diethyl Azelate	Unknown	NA	0
HMDB0251214	C14686	Dicyclohexylamine	Unknown	NA	0
HMDB0251174	NA	Dibutylamine	Unknown	NA	0
HMDB0033244	C14214	Dibutyl Phthalate	Food related; Drug related; Environment	Food related(FooDB:FDB011261 HMDB:HMDB0033244 T3DB:T3D0052); Drug related(DrugBank:DB13716); Environment(HMDB:HMDB0033244 T3DB:T3D0052)	0
HMDB0251169	NA	Dibenzylamine	Unknown	NA	0
HMDB0251144	D03771	Diaveridine	Drug related	Drug related(KEGG:D03771)	0
HMDB0036491	C08370	Diallyl Sulfide	Food related	Food related(FooDB:FDB003585 HMDB:HMDB0036491)	0
HMDB0003407	C00741	Diacetyl	Microbiota; Food related; Environment	Microbiota(BIGG:diact KEGG:C00741); Food related(FooDB:FDB011930 HMDB:HMDB0003407 T3DB:T3D3241); Environment(HMDB:HMDB0003407 T3DB:T3D3241)	0
HMDB0002545	C00333	D-Galacturonic Acid	Food related	Food related(FooDB:FDB001160 HMDB:HMDB0002545)	0
HMDB0116368	NA	DG(8:0/8:0/0:0)	Food related	Food related(HMDB:HMDB0116368)	0
HMDB0003581	C01909	Desthiobiotin	Microbiota; Food related; Drug related	Microbiota(BIGG:dtbt KEGG:C01909); Food related(FooDB:FDB023201 HMDB:HMDB0003581); Drug related(DrugBank:DB03775)	1
HMDB0037115	NA	Desmeninol	Food related	Food related(FooDB:FDB016108 HMDB:HMDB0037115)	0
NA	NA	Descladinose Azithromycin	Unknown	NA	1
NA	NA	Dereplicator Identification - Heptaibin	Unknown	NA	0
HMDB0001409	C00365	Deoxyuridine Monophosphate	Host; Microbiota; Food related; Drug related	Microbiota(BIGG:dump ChEBI:17622 KEGG:C00365); Food related(FooDB:FDB022604 HMDB:HMDB0001409); Drug related(DrugBank:DB03800)	0
HMDB0000012	C00526	Deoxyuridine	Host; Microbiota; Food related; Drug related	Microbiota(BIGG:duri ChEBI:16450 KEGG:C00526); Food related(FooDB:FDB021870 HMDB:HMDB0000012); Drug related(DrugBank:DB02256)	0
HMDB0006555	C06196	Deoxyinosine Monophosphate	Host; Microbiota; Food related	Microbiota(BIGG:dimp ChEBI:28806 KEGG:C06196); Food related(FooDB:FDB023969)	1
HMDB0000071	C05512	Deoxyinosine	Host; Microbiota; Food related; Drug related	Microbiota(BIGG:din ChEBI:28997 KEGG:C05512); Food related(FooDB:FDB012323 HMDB:HMDB0000071); Drug related(DrugBank:DB02380)	0
HMDB0000085	C00330	Deoxyguanosine	Host; Microbiota; Food related	Microbiota(BIGG:dgsn ChEBI:17172 KEGG:C00330); Food related(FooDB:FDB012064 HMDB:HMDB0000085)	0
HMDB0000014	C00881	Deoxycytidine	Host; Microbiota; Food related; Drug related	Microbiota(BIGG:dcyt ChEBI:15698 KEGG:C00881,D12465); Food related(FooDB:FDB021871 HMDB:HMDB0000014); Drug related(DrugBank:DB02594 KEGG:C00881,D12465)	1
HMDB0242414	C05464	Deoxycholylglycine	Microbiota; Food related	Microbiota(HMDB:HMDB0000631); Food related(FooDB:FDB022152 HMDB:HMDB0000631)	0
NA	C09943	Dendrobine	Unknown	NA	1
NA	NA	Delta9-Eremophilansaeure	Unknown	NA	0
NA	NA	Dehydroxynocardamine	Unknown	NA	1
NA	NA	Deacetylgedunin	Unknown	NA	1
NA	NA	Deacetoxy-7-Oxogedunin	Unknown	NA	0
HMDB0001202	C00239	dCMP	Host; Microbiota; Food related; Drug related	Microbiota(BIGG:dcmp ChEBI:15918 KEGG:C00239); Food related(FooDB:FDB022488 HMDB:HMDB0001202); Drug related(DrugBank:DB03798)	1
HMDB0003459	C00993	D-Alanyl-D-Alanine	Microbiota; Food related	Microbiota(BIGG:alaala ChEBI:16576 HMDB:HMDB0003459 KEGG:C00993); Food related(FooDB:FDB003740 HMDB:HMDB0003459)	1
HMDB0003312	C10208	Daidzein	Host; Microbiota; Food related; Drug related	Microbiota(ChEBI:28197 KEGG:C10208); Food related(FooDB:FDB002608 HMDB:HMDB0003312 T3DB:T3D3964); Drug related(DrugBank:DB13182)	1
HMDB0014989	C06936	Dacarbazine	Drug related; Environment	Drug related(DrugBank:DB00851 KEGG:C06936,D00288 T3DB:T3D4689); Environment(T3DB:T3D4689)	0
HMDB0001016	C03492	D-4-Phosphopantothenate	Host; Microbiota; Food related; Drug related	Microbiota(BIGG:4ppan ChEBI:15905 KEGG:C03492); Food related(FooDB:FDB022373 HMDB:HMDB0001016); Drug related(DrugBank:DB16966)	0
HMDB0000630	C00380	Cytosine	Microbiota; Food related	Microbiota(BIGG:csn ChEBI:16040 KEGG:C00380); Food related(FooDB:FDB022151 HMDB:HMDB0000630)	0
HMDB0000089	C00475	Cytidine	Host; Microbiota; Food related; Drug related	Microbiota(BIGG:cytd ChEBI:17562 KEGG:C00475,D07769); Food related(FooDB:FDB021809 HMDB:HMDB0000089); Drug related(DrugBank:DB02097 KEGG:C00475,D07769)	0
HMDB0000656	C05526	Cysteineglutathione Disulfide	Food related	Food related(FooDB:FDB022166)	1
HMDB0000574	C00097	Cysteine	Host; Microbiota; Food related; Drug related; Environment	Microbiota(BIGG:cys__L ChEBI:17561 KEGG:C00097,D00026); Food related(FooDB:FDB012678 HMDB:HMDB0000574 T3DB:T3D4156); Drug related(DrugBank:DB00151 KEGG:C00097,D00026 T3DB:T3D4156); Environment(HMDB:HMDB0000574 T3DB:T3D4156)	1
NA	NA	Cypridinid Etioluciferin	Unknown	NA	1
HMDB0014405	C08057	Cycloserine	Food related; Drug related	Food related(FooDB:FDB098104); Drug related(DrugBank:DB00260 KEGG:C08057,D00877)	0
HMDB0250671	NA	Cyclopentylamine	Unknown	NA	1
HMDB0031407	C00557	Cyclopentanone	Food related	Food related(FooDB:FDB003481 HMDB:HMDB0031407)	0
HMDB0014447	C12535	Cyclohexanecarboxylic Acid, 4-(Aminomethyl)-	Drug related	Drug related(DrugBank:DB00302 KEGG:C12535,D01136)	0
HMDB0031342	C09822	Cyclohexanecarboxylic Acid	Microbiota; Food related	Microbiota(KEGG:C09822); Food related(FooDB:FDB003406 HMDB:HMDB0031342)	0
NA	NA	Cyclododecalactam	Unknown	NA	0
NA	NA	Cyclo(Glycyltryptophylprolylglycylvalylglycyl-Beta-Hydroxytyrosyl)	Unknown	NA	0
HMDB0001314	C00942	Cyclic Gmp	Host; Microbiota; Food related; Drug related	Microbiota(BIGG:35cgmp ChEBI:16356 KEGG:C00942); Food related(FooDB:FDB030764 HMDB:HMDB0001314); Drug related(DrugBank:DB02315)	0
HMDB0001570	C00364	Cyclic 3,5-Dtmp	Host; Microbiota; Food related; Drug related	Microbiota(BIGG:dtmp ChEBI:17013 KEGG:C00364); Food related(FooDB:FDB022695); Drug related(DrugBank:DB01643)	1
HMDB0031340	C02824	Cyclamic Acid	Food related; Drug related	Food related(HMDB:HMDB0031340); Drug related(KEGG:C02824,D02442)	0
NA	C18573	Cyazofamid	Unknown	NA	0
NA	C15742	Cyanopeptolin A	Unknown	NA	0
NA	C10034	Cupressuflavone	Microbiota	Microbiota(ChEBI:3960)	1
HMDB0250581	C08797	Cucurbitacin E	Food related	Food related(FooDB:FDB014623)	1
NA	NA	Crocacin C	Unknown	NA	1
HMDB0250535	NA	Cresyl Saligenin	Unknown	NA	0
HMDB0000562	C00791	Creatinine	Microbiota; Food related; Drug related; Environment	Microbiota(BIGG:creat KEGG:C00791,D03600); Food related(FooDB:FDB021814 HMDB:HMDB0000562); Drug related(DrugBank:DB11846 KEGG:C00791,D03600); Environment(HMDB:HMDB0000562)	0
HMDB0000064	C00300	Creatine	Host; Microbiota; Food related; Drug related; Environment	Microbiota(KEGG:C00300); Food related(FooDB:FDB005403 HMDB:HMDB0000064 T3DB:T3D4290); Drug related(DrugBank:DB00148 T3DB:T3D4290); Environment(HMDB:HMDB0000064 T3DB:T3D4290)	0
NA	NA	Cotoin	Unknown	NA	0
HMDB0001046	NA	Cotinine	Food related; Environment	Food related(FooDB:FDB004716 HMDB:HMDB0001046 T3DB:T3D3956); Environment(HMDB:HMDB0001046 T3DB:T3D3956)	0
NA	NA	Corynoxine	Unknown	NA	1
HMDB0004701	C14825	Coronaric Acid	Host; Microbiota; Food related	Microbiota(KEGG:C14825); Food related(FooDB:FDB003107 HMDB:HMDB0004701)	0
HMDB0001261	C05770	Coproporphyrin III	Host; Microbiota; Food related; Drug related	Microbiota(BIGG:cpppg3 ChEBI:15439 KEGG:C03263); Food related(FooDB:FDB022518 HMDB:HMDB0001261 T3DB:T3D4438); Drug related(DrugBank:DB04461)	0
HMDB0034362	C08858	Convallatoxin	Food related	Food related(FooDB:FDB012731 HMDB:HMDB0034362)	1
HMDB0000564	C00157	Colfosceril Palmitate	Host; Microbiota; Food related; Drug related	Microbiota(KEGG:C00157); Food related(FooDB:FDB022121 HMDB:HMDB0000564); Drug related(DrugBank:DB09114)	0
HMDB0000904	C00327	Citrulline	Host; Microbiota; Food related; Drug related	Microbiota(BIGG:citr__L ChEBI:16349 KEGG:C00327,D07706); Food related(FooDB:FDB011841 HMDB:HMDB0000904 T3DB:T3D4295); Drug related(DrugBank:DB00155 KEGG:C00327,D07706 T3DB:T3D4295)	0
HMDB0000094	C00158	Citric Acid	Host; Microbiota; Food related; Drug related; Environment	Microbiota(BIGG:cit ChEBI:16947,30769 KEGG:C00158,D00037); Food related(FooDB:FDB030735 HMDB:HMDB0000094); Drug related(DrugBank:DB04272 KEGG:C00158,D00037); Environment(HMDB:HMDB0000094)	0
HMDB0000426	C02612	Citramalic Acid	Microbiota; Food related	Microbiota(BIGG:citm ChEBI:15584 HMDB:HMDB0000426); Food related(FooDB:FDB002815 HMDB:HMDB0000426)	0
HMDB0000634	C02226	Citraconic Acid	Microbiota; Food related; Drug related	Microbiota(BIGG:citac KEGG:C02226); Food related(FooDB:FDB022155 HMDB:HMDB0000634); Drug related(DrugBank:DB04734)	0
HMDB0005038	C07572	Citalopram	Host; Food related; Drug related; Environment	Food related(FooDB:FDB023605 T3DB:T3D2715); Drug related(DrugBank:DB00215 KEGG:C07572,D07704 T3DB:T3D2715); Environment(HMDB:HMDB0005038 T3DB:T3D2715)	0
HMDB0030677	C00811	Cis-P-Coumaric Acid	Food related	Food related(FooDB:FDB002592 HMDB:HMDB0030677)	0
HMDB0036213	NA	Cis-3-Hexenyl Lactate	Food related	Food related(FooDB:FDB015071 HMDB:HMDB0036213)	0
HMDB0000930	C10438	Cinnamic Acid	Microbiota; Food related	Microbiota(BIGG:cinnm ChEBI:35697 HMDB:HMDB0000930); Food related(FooDB:FDB012052 HMDB:HMDB0000930)	0
HMDB0000097	C00114	Choline	Host; Microbiota; Food related; Drug related	Microbiota(BIGG:chol ChEBI:15354 KEGG:C00114,D07690); Food related(FooDB:FDB000710 HMDB:HMDB0000097); Drug related(DrugBank:DB00122 KEGG:C00114,D07690)	0
HMDB0000619	C00695	Cholic Acid	Host; Microbiota; Food related; Drug related	Microbiota(BIGG:cholate KEGG:C00695,D10699); Food related(FooDB:FDB012810 HMDB:HMDB0000619 T3DB:T3D4343); Drug related(DrugBank:DB02659 KEGG:C00695,D10699)	1
HMDB0000067	C00187	Cholesterol	Host; Microbiota; Food related; Drug related; Environment	Microbiota(BIGG:chsterol KEGG:C00187,D00040); Food related(FooDB:FDB013269 HMDB:HMDB0000067 T3DB:T3D4314); Drug related(DrugBank:DB04540 KEGG:C00187,D00040); Environment(HMDB:HMDB0000067 T3DB:T3D4314)	0
HMDB0015373	D03472	Chloroxine	Drug related	Drug related(DrugBank:DB01243 KEGG:D03472)	0
NA	C18817	Chlorotoluron	Unknown	NA	0
HMDB0249836	C01564	Cetraxate	Drug related	Drug related(KEGG:C01564,D07663)	0
HMDB0246552	C00185	Cellobiose	Host; Food related	Food related(FooDB:FDB001182)	0
HMDB0000957	C00090	Catechol	Microbiota; Food related; Drug related; Environment	Microbiota(BIGG:catechol HMDB:HMDB0000957); Food related(FooDB:FDB001512 HMDB:HMDB0000957); Drug related(DrugBank:DB02232); Environment(HMDB:HMDB0000957)	0
NA	NA	Carpachromene	Unknown	NA	0
HMDB0000062	C00487	Carnitine	Host; Microbiota; Food related; Drug related; Environment	Microbiota(BIGG:crn ChEBI:16347); Food related(FooDB:FDB000571 HMDB:HMDB0000062); Drug related(DrugBank:DB00583 KEGG:C00318,D02176); Environment(HMDB:HMDB0000062)	0
HMDB0029415	C03727	Carbocysteine	Food related; Drug related	Food related(HMDB:HMDB0029415); Drug related(DrugBank:DB04339 KEGG:C03727,D00175)	0
NA	NA	Capric Dimethyl Amine Oxide	Drug related	Drug related(DrugBank:DB02613)	0
HMDB0059839	C06076	Camphene	Food related; Drug related	Food related(FooDB:FDB009065 HMDB:HMDB0059839); Drug related(DrugBank:DB15917)	0
HMDB0038631	C21721	Camalexin	Food related	Food related(FooDB:FDB018026 HMDB:HMDB0038631)	0
HMDB0031345	NA	Calystegine A6	Food related	Food related(HMDB:HMDB0031345)	0
HMDB0249565	NA	Calycin	Unknown	NA	1
HMDB0002322	C01672	Cadaverine	Host; Microbiota; Food related; Drug related	Microbiota(BIGG:15dap ChEBI:18127 HMDB:HMDB0002322 KEGG:C01672); Food related(FooDB:FDB001493 HMDB:HMDB0002322); Drug related(DrugBank:DB03854)	0
HMDB0037559	NA	Cadabicilone	Food related	Food related(FooDB:FDB016641 HMDB:HMDB0037559)	0
NA	NA	C17-Sphinganine	Unknown	NA	0
HMDB0002013	C02862	Butyrylcarnitine	Food related	Food related(FooDB:FDB022795 HMDB:HMDB0002013)	0
NA	NA	Butyl 4-[(3,4-Dimethoxyphenyl)CarbonylaminoBenzoate	Unknown	NA	1
HMDB0014382	C07827	Butabarbital	Drug related; Environment	Drug related(DrugBank:DB00237 KEGG:C07827,D03180 T3DB:T3D2721); Environment(T3DB:T3D2721)	1
NA	C10649	Bucharaine	Unknown	NA	1
HMDB0249370	C09920	Brazilin	Microbiota	Microbiota(ChEBI:3170)	0
NA	NA	Bovoside A	Unknown	NA	1
HMDB0249241	NA	Bistris	Unknown	NA	0
HMDB0240712	C14216	Bisphenol S	Unknown	NA	0
HMDB0249276	C14350	Bisphenol AF	Unknown	NA	0
NA	NA	Bis(2-Ethylhexyl) Sebacate	Unknown	NA	0
NA	NA	Biotin Methyl Ester	Unknown	NA	0
HMDB0015465	D01366	Bezafibrate	Drug related	Drug related(DrugBank:DB01393 KEGG:D01366)	0
HMDB0001252	C00576	Betaine Aldehyde	Host; Microbiota; Food related; Drug related	Microbiota(BIGG:betald ChEBI:15710 KEGG:C00576); Food related(FooDB:FDB022513 HMDB:HMDB0001252); Drug related(DrugBank:DB04401)	0
HMDB0000043	C00719	Betaine	Host; Microbiota; Food related; Drug related	Microbiota(BIGG:glyb); Food related(HMDB:HMDB0000043); Drug related(DrugBank:DB04455)	0
HMDB0248216	NA	Beta-Gentiobiose	Unknown	NA	0
NA	NA	Beta-D-Glucopyranoside, 4-Hydroxy-3-(3-Methyl-2-Buten-1-Yl)Phenyl 6-O-[(2R,3R,4R)-Tetrahydro-3,4-Dihydroxy-4-(Hydroxymethyl)-2-Furanyl-	Unknown	NA	0
NA	NA	Beta-D-Glucopyranose, 6-O-Beta-D-Glucopyranosyl-1-O-[(2,6,6-Trimethyl-1-Cyclohexen-1-Yl)Carbonyl-	Unknown	NA	1
NA	NA	Beta-D-Glucopyranose, 1-O-[(2Alpha,3Beta,5Xi,9Xi,18Xi)-2,3,19-Trihydroxy-28-Oxours-12-En-28-Yl-	Unknown	NA	1
HMDB0060441	C05340	Beta-Alanyl-L-Arginine	Host	NA	1
NA	NA	Beta- Belladonnine Dichloroethylate	Unknown	NA	0
NA	NA	Benzoylcholine	Unknown	NA	0
NA	NA	Benzothiazole-2-Sulfonic Acid	Unknown	NA	0
HMDB0032930	NA	Benzothiazole	Food related; Drug related	Food related(FooDB:FDB010915 HMDB:HMDB0032930); Drug related(DrugBank:DB08624)	0
HMDB0032049	C06354	Benzophenone	Food related; Drug related; Environment	Food related(HMDB:HMDB0032049 T3DB:T3D3976); Drug related(DrugBank:DB01878); Environment(HMDB:HMDB0032049 T3DB:T3D3976)	0
HMDB0001870	C00180	Benzoic Acid	Microbiota; Food related; Drug related; Environment	Microbiota(BIGG:bz ChEBI:16150,30746 HMDB:HMDB0001870 KEGG:C00180,C00539,D00038); Food related(FooDB:FDB008739 HMDB:HMDB0001870 T3DB:T3D4785); Drug related(DrugBank:DB03793 KEGG:C00180,C00539,D00038); Environment(HMDB:HMDB0001870 T3DB:T3D4785)	0
HMDB0032929	C14512	Benzofuran	Food related; Drug related	Food related(FooDB:FDB010914 HMDB:HMDB0032929); Drug related(DrugBank:DB04179)	0
NA	NA	Benzododecinium	Drug related	Drug related(DrugBank:DB13282)	0
HMDB0034171	C16074	Benzeneacetonitrile	Microbiota; Food related; Drug related	Microbiota(KEGG:C16074); Food related(FooDB:FDB012457 HMDB:HMDB0034171 T3DB:T3D1692); Drug related(DrugBank:DB04817)	1
NA	C18415	Benthiavalicarb Isopropyl	Unknown	NA	1
HMDB0248860	NA	Baohuoside I	Unknown	NA	1
HMDB0302856	C08268	Baikiain	Food related	Food related(FooDB:FDB006553)	1
HMDB0041832	C10025	Baicalin	Microbiota	Microbiota(ChEBI:2981)	0
HMDB0014352	C06838	Azithromycin	Food related; Drug related	Food related(FooDB:FDB022735); Drug related(DrugBank:DB00207 KEGG:C06838,D07486)	1
HMDB0000784	C08261	Azelaic Acid	Microbiota; Food related; Drug related; Environment	Microbiota(ChEBI:48131); Food related(FooDB:FDB012192 HMDB:HMDB0000784 T3DB:T3D4799); Drug related(DrugBank:DB00548 KEGG:C08261,D03034 T3DB:T3D4799); Environment(HMDB:HMDB0000784)	0
HMDB0030005	NA	Austalide A	Food related	Food related(FooDB:FDB001295 HMDB:HMDB0030005)	1
NA	NA	Auranticin A	Unknown	NA	1
HMDB0003573	C01479	Atropine	Food related; Drug related	Food related(FooDB:FDB023199 T3DB:T3D2877); Drug related(DrugBank:DB00747 KEGG:C01851,D00138 T3DB:T3D2877)	1
NA	C10645	Atalaphylline	Unknown	NA	0
HMDB0248668	NA	Asperulosidic Acid	Unknown	NA	1
HMDB0002335	NA	Aspartyl-Proline	Food related	Food related(FooDB:FDB022967)	1
HMDB0000706	NA	Aspartyl-Phenylalanine	Food related	Food related(FooDB:FDB002275 HMDB:HMDB0000706)	0
HMDB0028757	NA	Aspartylleucine	Food related	Food related(FooDB:FDB111811)	1
HMDB0000191	C00049	Aspartic Acid	Host; Microbiota; Food related; Drug related	Microbiota(BIGG:asp__L ChEBI:17053 KEGG:C00049,D00013); Food related(FooDB:FDB012567 HMDB:HMDB0000191); Drug related(DrugBank:DB00128 KEGG:C00049,D00013)	0
HMDB0000044	C00072	Ascorbic Acid	Microbiota; Food related; Drug related	Microbiota(BIGG:ascb__L ChEBI:29073 HMDB:HMDB0000044 KEGG:C01041); Food related(FooDB:FDB001224 HMDB:HMDB0000044); Drug related(DrugBank:DB00126)	0
HMDB0028721	NA	Arginyltyrosine	Food related	Food related(FooDB:FDB111778)	1
HMDB0028716	NA	Arginylphenylalanine	Food related	Food related(FooDB:FDB111773)	1
HMDB0000517	C00062	Arginine	Host; Microbiota; Food related; Drug related; Environment	Microbiota(BIGG:arg__L ChEBI:16467 KEGG:C00062,D02982); Food related(FooDB:FDB002257 HMDB:HMDB0000517 T3DB:T3D4289); Drug related(DrugBank:DB00125 KEGG:C00062,D02982 T3DB:T3D4289); Environment(HMDB:HMDB0000517 T3DB:T3D4289)	1
HMDB0248559	NA	Arachidoyl Ethanolamide	Unknown	NA	0
NA	NA	Apiopaeonoside	Unknown	NA	0
NA	NA	Apiopaenoside	Unknown	NA	1
HMDB0001123	C00108	Anthranilic Acid	Host; Microbiota; Food related; Drug related	Microbiota(BIGG:anth ChEBI:16567,30754 KEGG:C00108); Food related(FooDB:FDB000896 HMDB:HMDB0001123 T3DB:T3D4165); Drug related(DrugBank:DB04166)	1
HMDB0249891	NA	Antcin K	Unknown	NA	0
HMDB0015348	C08159	Anastrozole	Drug related; Environment	Drug related(DrugBank:DB01217 KEGG:C08159,D00960 T3DB:T3D4796); Environment(HMDB:HMDB0015348 T3DB:T3D4796)	0
NA	NA	Anabasamine	Unknown	NA	0
HMDB0014328	C07514	Amphetamine	Drug related; Environment	Drug related(DrugBank:DB00182 KEGG:C07514,D07445 T3DB:T3D2706); Environment(T3DB:T3D2706)	0
HMDB0000045	C00020	Amp	Host; Microbiota; Food related; Drug related	Microbiota(BIGG:amp ChEBI:16027 KEGG:C00020,D02769); Food related(FooDB:FDB030677); Drug related(DrugBank:DB00131 KEGG:C00020,D02769)	0
HMDB0011747	C03557	Aminoethylphosphonic Acid	Host; Microbiota; Food related	Microbiota(BIGG:2ameph KEGG:C03557); Food related(FooDB:FDB028420)	0
NA	C10933	Amidosulfuron	Unknown	NA	0
HMDB0015554	D07440	Alverine	Drug related	Drug related(DrugBank:DB01616 KEGG:D07440)	0
HMDB0243703	NA	Alpha-Methyl-4-Carboxyphenylglycine	Unknown	NA	0
NA	NA	Alpha-Maltotriose	Unknown	NA	0
HMDB0000019	C00141	Alpha-Ketoisovalerate	Host; Microbiota; Food related; Drug related	Microbiota(BIGG:3mob ChEBI:11851,16530 KEGG:C00141); Food related(FooDB:FDB012250 HMDB:HMDB0000019 T3DB:T3D4425); Drug related(DrugBank:DB04074)	0
NA	NA	Alpha-D-Glucopyranoside, Alpha-D-Glucopyranosyl, 3-(2-Methylbutanoate)	Unknown	NA	1
HMDB0001263	C04076	Allysine	Host; Microbiota; Food related; Drug related	Microbiota(BIGG:L2aadp6sa ChEBI:17917 KEGG:C04076); Food related(FooDB:FDB010644); Drug related(DrugBank:DB02571)	0
HMDB0001151	C01487	Allose	Microbiota; Food related	Microbiota(BIGG:all__D KEGG:C01487); Food related(FooDB:FDB022453)	0
HMDB0000462	C01551	Allantoin	Microbiota; Food related; Drug related; Environment	Microbiota(BIGG:alltn ChEBI:15676 HMDB:HMDB0000462); Food related(FooDB:FDB001613 HMDB:HMDB0000462 T3DB:T3D4936); Drug related(DrugBank:DB11100 KEGG:C01551,D00121); Environment(HMDB:HMDB0000462 T3DB:T3D4936)	0
HMDB0028700	NA	Alanylvaline	Food related	Food related(FooDB:FDB111757)	1
HMDB0028694	NA	Alanylphenylalanine	Microbiota; Food related	Microbiota(BIGG:ala_L_phe__L); Food related(FooDB:FDB111753)	1
NA	NA	Alanylnorvaline	Unknown	NA	1
HMDB0028686	C20958	Alanylglutamic Acid	Food related	Food related(FooDB:FDB111746)	0
HMDB0001310	C01401	Alanine	Microbiota; Food related; Drug related	Microbiota(BIGG:ala__D ChEBI:15570 HMDB:HMDB0001310 KEGG:C00133); Food related(FooDB:FDB022546); Drug related(DrugBank:DB01786)	0
HMDB0028690	NA	Ala-Ile	Food related	Food related(FooDB:FDB111749)	1
NA	NA	Aeruginosamide B	Unknown	NA	0
HMDB0001178	C00301	ADP-ribose	Host; Microbiota; Food related	Microbiota(BIGG:adprib ChEBI:16960 KEGG:C00301); Food related(FooDB:FDB022468)	0
HMDB0000448	C06104	Adipic Acid	Microbiota; Food related; Drug related; Environment	Microbiota(HMDB:HMDB0000448 KEGG:C06104,D08839); Food related(FooDB:FDB008309 HMDB:HMDB0000448); Drug related(KEGG:C06104,D08839); Environment(HMDB:HMDB0000448)	0
HMDB0000034	C00147	Adenine	Host; Microbiota; Food related; Drug related	Microbiota(BIGG:ade ChEBI:16708 KEGG:C00147,D00034); Food related(FooDB:FDB012266 HMDB:HMDB0000034 T3DB:T3D4279); Drug related(DrugBank:DB00173 KEGG:C00147,D00034 T3DB:T3D4279)	0
HMDB0247988	D02763	Actodigin	Drug related	Drug related(KEGG:D02763)	0
NA	C06691	Actinorhodin	Microbiota	Microbiota(ChEBI:2448)	1
HMDB0000072	C00417	Aconitic Acid	Host; Microbiota; Food related	Microbiota(BIGG:acon_C ChEBI:16383,32805 KEGG:C00417); Food related(FooDB:FDB008306 HMDB:HMDB0000072)	0
HMDB0255052	C03137	Acetyltryptophan	Unknown	NA	0
HMDB0034159	NA	Acetyltributyl Citrate	Food related; Environment	Food related(FooDB:FDB012444 HMDB:HMDB0034159 T3DB:T3D4871); Environment(HMDB:HMDB0034159 T3DB:T3D4871)	0
HMDB0000201	C02571	Acetyl-L-Carnitine	Microbiota; Food related; Drug related	Microbiota(BIGG:acrn ChEBI:15960,57589); Food related(FooDB:FDB093666 HMDB:HMDB0000201); Drug related(DrugBank:DB08842)	0
HMDB0000212	C01074	Acetylgalactosamine	Food related; Drug related	Food related(FooDB:FDB031022 HMDB:HMDB0000212); Drug related(DrugBank:DB03567)	1
HMDB0001890	C06809	Acetylcysteine	Food related; Drug related	Food related(FooDB:FDB002281 HMDB:HMDB0001890); Drug related(DrugBank:DB06151 KEGG:C06809,D00221)	0
HMDB0001138	C00624	Acetyl Glutamic Acid	Host; Microbiota; Food related; Drug related	Microbiota(BIGG:acglu ChEBI:172431,17533,44337 KEGG:C00624); Food related(FooDB:FDB031019); Drug related(DrugBank:DB04075)	0
HMDB0060427	C02659	Acetone Cyanohydrin	Host; Microbiota; Food related; Drug related	Microbiota(KEGG:C02659); Food related(FooDB:FDB030647); Drug related(DrugBank:DB02203)	0
HMDB0247909	NA	Acetoacetaldehyde	Unknown	NA	0
HMDB0001250	C07565	Acetanilide	Food related	Food related(FooDB:FDB022512)	1
HMDB0033585	NA	Acesulfame	Food related; Drug related	Food related(FooDB:FDB011661 HMDB:HMDB0033585); Drug related(DrugBank:DB16868)	0
NA	NA	Abamectin Component B1A	Unknown	NA	0
HMDB0247607	C19670	9-Octadecenamide	Microbiota; Food related; Drug related	Microbiota(ChEBI:116314); Food related(FooDB:FDB012436 HMDB:HMDB0002117); Drug related(DrugBank:DB03784)	0
NA	NA	9-Methoxy-4,4-Dimethyl-13-Phenyl-6,14-Dioxatetracyclo[8.4.0.02,7.03,5Tetradeca-1,7,9-Trien-11-One	Unknown	NA	0
NA	NA	9,13-Epoxy-3,18-Dihydroxy-15,16-Labdanolide	Unknown	NA	0
NA	NA	9,12,13-Trihydroxyoctadeca-10,15-Dienoic Acid	Unknown	NA	0
HMDB0004708	C14833	9,12,13-Trihome	Food related	Food related(FooDB:FDB023418 HMDB:HMDB0004708)	0
HMDB0302107	C19620	9,10-Epoxy-18-Hydroxy-Octadecanoic Acid	Microbiota; Food related	Microbiota(ChEBI:133381 KEGG:C19620); Food related(FooDB:FDB001865)	0
HMDB0302281	C08314	9,10-Dihydroxystearic Acid	Food related	Food related(FooDB:FDB004012)	0
HMDB0010221	NA	9,10-Dihode	Food related	Food related(FooDB:FDB027374 HMDB:HMDB0010221)	0
HMDB0004710	C14835	9,10,13-Trihome	Food related	Food related(FooDB:FDB023419 HMDB:HMDB0004710)	0
HMDB0247457	NA	8-Oxo-7,8-Dihydrodeoxyguanine	Unknown	NA	0
HMDB0247450	NA	8-Methylquinoline	Unknown	NA	0
NA	NA	8-Methoxycanthin-6-One	Unknown	NA	0
NA	NA	8-Hydroxy-9,10-Epoxystearic Acid	Unknown	NA	0
NA	NA	8-Hydroxy-13,14,15,16-Tetranor-12-Labdanoic Acid	Unknown	NA	0
NA	NA	8-Bromo-6-Chloro-3-(4-Hydroxyphenyl)-4-Methylchromen-2-One	Unknown	NA	0
HMDB0240687	C01092	8-Amino-7-Oxononanoic Acid	Microbiota; Drug related	Microbiota(BIGG:8aonn KEGG:C01092); Drug related(DrugBank:DB02274)	0
NA	NA	8-[2-(3,4-Dihydroxy-2,5-Dimethoxyoxolan-3-Yl)Ethyl-4A,7,8-Trimethylspiro[2,3,5,6,7,8A-Hexahydro-1H-Naphthalene-4,2-Oxirane-2,3-Diol	Unknown	NA	1
NA	NA	8-[(2-Chlorophenyl)Methylthio-3-Methyl-7-[(3-Methylphenyl)Methyl-1,3,7-Trihy Dropurine-2,6-Dione	Unknown	NA	0
HMDB0004679	C14776	8(S)-Hete	Food related	Food related(FooDB:FDB023400 HMDB:HMDB0004679)	0
NA	NA	8-(Diethylamino)Octyl-3,4,5-Trimethoxybenzoate Hydrochloride53464-72-5	Unknown	NA	0
NA	NA	7-Hydroxy-N-Geranyl-L-Glutamic Acid	Unknown	NA	0
NA	NA	7-Hydroxy-3-Phenyl-8-(Piperidylmethyl)Chromen-4-One	Unknown	NA	1
HMDB0040408	NA	7-Hydroxy-2-Methyl-4-Oxo-4H-1-Benzopyran-5-Acetic Acid	Food related	Food related(FooDB:FDB020140 HMDB:HMDB0040408)	0
NA	NA	7-Hydroxy-1-({2-O-[(2E,6E)-8-Hydroxy-2,6-Dimethyl-2,6-Octadienoyl-Beta-D-Glucopyranosyl}Oxy)-7-Methyl-1,4A,5,6,7,7A-Hexahydrocyclopenta[CPyran-4-Carboxylic Acid	Unknown	NA	1
HMDB0039664	NA	7-Ethyl-2,3,6,7-Tetrahydrocyclopent[BAzepin-8(1H)-One	Food related	Food related(FooDB:FDB019293 HMDB:HMDB0039664)	0
NA	NA	7-Chloro-4,8-Dihydroxy-6-Methoxy-3-Methyl-3,4-Dihydroisochromen-1-One	Unknown	NA	1
NA	NA	7-Benzyloxytryptamine	Unknown	NA	1
HMDB0035918	NA	7(14)-Bisabolene-2,3,10,11-Tetrol	Food related	Food related(FooDB:FDB014711 HMDB:HMDB0035918)	0
HMDB0252077	NA	6-Oxo-Butanal	Unknown	NA	1
HMDB0248216	C05402	6-O-(Alpha-D-Galactopyranosyl)-D-Glucopyranose	Host; Microbiota; Food related	Microbiota(BIGG:6dg ChEBI:28053 HMDB:HMDB0000048 KEGG:C05402,G01275); Food related(FooDB:FDB001204 HMDB:HMDB0000048)	0
NA	NA	6-O-(4-Hydroxycinnamoyl)-Beta-D-Glucopyranose 1,2-Bis(3,4,5-Trihydroxybenzoate)	Unknown	NA	0
HMDB0247095	NA	6-N-Propyluracil	Unknown	NA	1
HMDB0060412	C16614	6-Methylthiopurine	Host; Microbiota	Microbiota(KEGG:C16614)	1
HMDB0030030	C07288	6-Methyl-5-Hepten-2-Ol	Food related	Food related(FooDB:FDB001328 HMDB:HMDB0030030)	0
HMDB0038692	NA	6-Methyl-2-Methylene-6-Octene-1,3,8-Triol	Food related	Food related(FooDB:FDB018096 HMDB:HMDB0038692)	0
HMDB0240264	C01297	6-Hydroxypseudooxynicotine	Microbiota	Microbiota(KEGG:C01297)	1
NA	NA	6-Hydroxymethyl-2,2-Dimethyl-Dihydro-Furo(3,4-D)(1,3)Dioxol-4-One	Unknown	NA	0
HMDB0004081	C05643	6-Hydroxymelatonin	Host; Microbiota; Food related	Microbiota(KEGG:C05643); Food related(FooDB:FDB023304 HMDB:HMDB0004081)	1
NA	NA	6-Ethoxy-4-Hydroxy-3-Benzylhydroquinolin-2-One	Unknown	NA	1
NA	NA	6-Ethoxy-4-({4-[(4-Methoxyphenyl)MethylPiperazinyl}Methyl)Chromen-2-One	Unknown	NA	0
NA	NA	6-Chloro-3-[4-(2-Hydroxyethyl)Piperazinyl-4-Phenylhydroquinolin-2-One	Unknown	NA	1
NA	NA	6-Chloro-2-(Trichloromethyl)Chromen-4-One	Unknown	NA	0
NA	NA	6-Amino-4-(4-Hydroxyphenyl)-3-Propyl-4H-Pyrano[3,2-DPyrazole-5-Carbonitrile	Unknown	NA	0
NA	NA	6-Amino-4-(4-Hydroxy-5-Methoxy-3-Nitrophenyl)-3-Methyl-1-Phenyl-4H-Pyrano[3,2- DPyrazole-5-Carbonitrile	Unknown	NA	0
NA	NA	6-Acetyloxy-7-Ethenyl-1,4A,7-Trimethyl-3,4,4B,5,6,8,10,10A-Octahydro-2H-Phenanthrene-1-Carboxylic Acid	Unknown	NA	0
NA	NA	6,8-Bis(Morpholino-4-Iummethyl)-4-Oxo-3-(4-(((2S,3R,4S,5S,6R)-3,4,5-Trihydroxy-6-(Hydroxymethyl)Tetrahydro-2H-Pyran-2-Yl)Oxy)Phenyl)-4H-Chromene-5,7-Bis(Olate)	Unknown	NA	0
HMDB0259359	NA	6,7-Dimethoxy-3-Phenylquinoxaline	Unknown	NA	0
NA	NA	6-(N-{2-[2-Methyl-5-(Trifluoromethoxy)Indol-3-YlEthyl}Carbamoyl)Cyclohex-3-En Ecarboxylic Acid	Unknown	NA	1
HMDB0257214	NA	6-(Gamma,Gamma-Dimethylallylamino)Purine Riboside	Unknown	NA	1
NA	NA	6-(Diaminomethylideneamino)-2-[[(4E,6E,12E,14E)-3-Hydroxy-2-(Hydroxymethyl)-8,10,16-Trimethyloctadeca-4,6,12,14-TetraenoylAminoHexanoic Acid	Unknown	NA	0
NA	NA	6-(2,4-Dihydroxy-3,5-Dimethylhexyl)-4-Hydroxy-3-Methylpyran-2-One	Unknown	NA	1
HMDB0034074	NA	5-Oxooctadecanoic Acid	Food related	Food related(FooDB:FDB012332 HMDB:HMDB0034074)	0
HMDB0246885	NA	5-O-Methylthymidine	Unknown	NA	1
HMDB0240845	NA	5-Methylpentadecanoylcarnitine	Unknown	NA	0
HMDB0002894	C02376	5-Methylcytosine	Microbiota; Food related	Microbiota(BIGG:5mcsn KEGG:C02376); Food related(FooDB:FDB004432 HMDB:HMDB0002894)	0
HMDB0000472	C01017	5-Hydroxytryptophan	Microbiota; Food related; Drug related	Microbiota(KEGG:C00643,D07339); Food related(FooDB:FDB006231 HMDB:HMDB0000472 T3DB:T3D4298); Drug related(DrugBank:DB02959 KEGG:C00643,D07339 T3DB:T3D4298)	1
NA	NA	5-Hydroxymethyluridine	Unknown	NA	0
NA	NA	5-Hydroxymethylcytidine	Unknown	NA	0
HMDB0032988	NA	5-Hydroxymaltol	Food related	Food related(FooDB:FDB010977 HMDB:HMDB0032988)	0
HMDB0303912	C09938	5-Hydroxycalamenene	Food related	Food related(FooDB:FDB029770)	0
HMDB0030994	NA	5-Heptyltetrahydro-2-Oxo-3-Furancarboxylic Acid	Food related	Food related(HMDB:HMDB0030994)	0
HMDB0246781	NA	5-Dihydroxyhept-6-Enoic Acid	Unknown	NA	0
HMDB0000095	C00055	5-CMP	Host; Microbiota; Food related; Drug related	Microbiota(BIGG:cmp ChEBI:17361,181630 KEGG:C00055,G10621); Food related(FooDB:FDB030736 HMDB:HMDB0000095); Drug related(DrugBank:DB03403)	0
HMDB0247018	C19642	5Beta-Cholanic Acid	Unknown	NA	0
HMDB0003355	C00431	5-Aminovaleric Acid	Microbiota; Food related	Microbiota(BIGG:5aptn HMDB:HMDB0003355 KEGG:C00431); Food related(FooDB:FDB023151)	1
NA	NA	5-[(E)-3-Hydroxybut-1-Enyl-4-[4-[(E)-3-Oxobut-1-EnylAnilinoOxolan-2-One	Unknown	NA	1
HMDB0037776	NA	5,9:6,9-Diepoxy-3-Megastigmene	Food related	Food related(FooDB:FDB018427 HMDB:HMDB0037776)	0
NA	NA	5,7-Dimethyl-4-(2-1,2,3,4-Tetrahydroisoquinolylmethyl)Chromen-2-One	Unknown	NA	1
HMDB0030746	NA	5,7-Dihydroxy-2-(3-Hydroxy-4-Methoxyphenyl)-3,4-Dihydro-2H-1-Benzopyran-4-One	Food related	Food related(HMDB:HMDB0030746)	1
HMDB0246643	NA	5,6-Dimethyl-2,3-Pyrazinedicarbonitrile	Unknown	NA	0
HMDB0246248	NA	5,6-Dihydroxy-2-Methylaminotetralin	Unknown	NA	0
HMDB0304210	C00906	5,6-Dihydrothymine	Microbiota; Food related	Microbiota(BIGG:56dthm); Food related(FooDB:FDB030555)	1
NA	NA	5,6-Dibenzoyloxy-7-Methyl-1-[3,4,5-Trihydroxy-6-(Hydroxymethyl)Oxan-2-YlOxy-1,4A,5,6,7,7A-Hexahydrocyclopenta[CPyran-4-Carboxylic Acid	Unknown	NA	0
HMDB0029709	NA	5,6,7,8-Tetrahydro-4-Methylquinoline	Food related	Food related(HMDB:HMDB0029709)	0
NA	NA	5-(4-Carboxy-3-Methylbutyl)-5,6,8A-Trimethyl-3-Oxo-4A,6,7,8-Tetrahydro-4H-Naphthalene-1-Carboxylic Acid	Unknown	NA	1
HMDB0001161	C01181	4-Trimethylammoniobutanoate	Host; Microbiota; Food related	Microbiota(BIGG:gbbtn ChEBI:16244 KEGG:C01181); Food related(FooDB:FDB024107 HMDB:HMDB0001161)	0
HMDB0246588	NA	4-Thiouridine	Unknown	NA	0
HMDB0246561	C01877	4-Oxo-L-Proline	Unknown	NA	1
HMDB0029646	C10680	4-O-Methylphloroacetophenone	Food related	Food related(FooDB:FDB000817 HMDB:HMDB0029646)	0
HMDB0001232	C00870	4-Nitrophenol	Microbiota; Food related; Drug related; Environment	Microbiota(KEGG:C00870); Food related(FooDB:FDB022503 T3DB:T3D0257); Drug related(DrugBank:DB04417); Environment(HMDB:HMDB0001232 T3DB:T3D0257)	0
NA	NA	4-Methyoxybenzoyl-N-Glycine	Unknown	NA	0
NA	NA	4-Methylphthalic Anhydride	Unknown	NA	0
HMDB0246511	C19262	4-Methylimidazole	Drug related	Drug related(DrugBank:DB03385)	0
HMDB0249518	NA	4-Methylene-2-Octyl-5-Oxotetrahydrofuran-3-Carboxylic Acid	Unknown	NA	0
NA	NA	4-Methyl-11-(4-Sulfophenyl)Tridecanoic Acid	Unknown	NA	0
HMDB0060768	NA	4-Hydroxymethylpyrazole	Unknown	NA	0
HMDB0246635	NA	4-Hydroxymethohexital	Unknown	NA	1
HMDB0029559	NA	4-Hydroxybenzoylcholine	Food related	Food related(HMDB:HMDB0029559)	0
NA	NA	4-Hydroxybenzotriazole	Unknown	NA	0
HMDB0000500	C00156	4-Hydroxybenzoic Acid	Host; Microbiota; Food related; Drug related	Microbiota(BIGG:4hbz ChEBI:17879,30763 HMDB:HMDB0000500 KEGG:C00156); Food related(FooDB:FDB010508 HMDB:HMDB0000500); Drug related(DrugBank:DB04242)	0
HMDB0000500	C00156	4-Hydroxybenzoate	Host; Microbiota; Food related; Drug related	Microbiota(BIGG:4hbz ChEBI:17879,30763 HMDB:HMDB0000500 KEGG:C00156); Food related(FooDB:FDB010508 HMDB:HMDB0000500); Drug related(DrugBank:DB04242)	0
HMDB0011718	C00633	4-Hydroxybenzaldehyde	Microbiota; Food related; Drug related	Microbiota(BIGG:4hbald ChEBI:17597 KEGG:C00633); Food related(FooDB:FDB010504 HMDB:HMDB0011718); Drug related(DrugBank:DB03560)	0
NA	NA	4-Hydroxy-3-[(4-Hydroxy-2-Oxo-8-Phenyl(3-Hydroquinolyl))(4-Methylthiophenyl)Me Thyl-1-Phenylhydroquinolin-2-One	Unknown	NA	1
HMDB0030770	C10702	4-Hydroxy-3-(3-Methyl-2-Butenyl)Acetophenone	Food related	Food related(HMDB:HMDB0030770)	0
HMDB0031256	NA	4-Hydroxy-2H-Pyran-3-Carboxaldehyde	Food related	Food related(HMDB:HMDB0031256)	1
NA	NA	4H-Phenanthro[10,1-BcFuran-4-One, Tetradecahydro-1,2,6,9,10-Pentahydroxy-3,10A,10C-Trimethyl-7-Methylene-, (1S,2R,3R,5As,6R,9S,10S,10As,10Cr)-	Unknown	NA	0
HMDB0062551	NA	4-Ethylphenylsulfate	Food related	Food related(FooDB:FDB034845)	0
HMDB0246419	NA	4-Ethylaniline	Unknown	NA	0
NA	NA	4-[3-Methyl-5-(5,6,7-Trihydroxy-1,2,4A,5-Tetramethyl-3,4,6,7,8,8A-Hexahydro-2H-Naphthalen-1-Yl)Pentoxy-4-Oxobutanoic Acid	Unknown	NA	0
NA	NA	4-[(E)-3-[(2R,3R,4S,5S,6R)-3-[(2S,3R,4R)-3,4-Dihydroxy-4-(Hydroxymethyl)Oxolan-2-YlOxy-4,5-Dihydroxy-6-(Hydroxymethyl)Oxan-2-YlOxybut-1-Enyl-3,5,5-Trimethylcyclohex-2-En-1-One	Unknown	NA	1
NA	NA	4,5-Dihydroxy-4,5,6-Trimethyl-2,8-Dioxa-13-Azatricyclo[8.5.1.013,16Hexadec-10-Ene-3,7-Dione	Unknown	NA	0
NA	NA	4-(Decan-4-Yl)Benzenesulfonic Acid	Unknown	NA	0
NA	NA	4-(3-(((2R,4S,5S,6R)-4,5-Dihydroxy-6-Methyltetrahydro-2H-Pyran-2-Yl)Oxy)-10-((E)-((4-Fluorophenethyl)Imino)Methyl)-5,14-Dihydroxy-13-Methylhexadecahydro-1H-Cyclopenta[APhenanthren-17-Yl)Furan-2(5H)-One	Unknown	NA	0
NA	NA	4-((3S,10R,13R,14S,17R)-3-(((2R,3R,4S,5R,6R)-3,4-Dihydroxy-6-Methyl-5-(((2S,3R,4S,5S,6R)-3,4,5-Trihydroxy-6-(Hydroxymethyl)Tetrahydro-2H-Pyran-2-Yl)Oxy)Tetrahydro-2H-Pyran-2-Yl)Oxy)-14-Hydroxy-10-(Hydroxymethyl)-13-Methylhexadecahydro-1H-Cyclopenta[APhenanthren-17-Yl)Furan-2(5H)-One	Unknown	NA	1
HMDB0000807	C00597	3-Phosphoglyceric Acid	Food related; Drug related	Food related(FooDB:FDB022255); Drug related(DrugBank:DB04510)	0
HMDB0000779	C01479	3-Phenyllactic Acid	Microbiota; Food related; Drug related	Microbiota(HMDB:HMDB0000779); Food related(FooDB:FDB022236); Drug related(KEGG:C01479)	0
HMDB0245972	NA	3-Phenylacetylamino-2,6-Piperidinedione	Unknown	NA	1
NA	NA	3-Phenyl-2-(Pyrrolidin-2-Ylformamido)Propanoic Acid	Unknown	NA	1
NA	NA	3-O-Acetylpadmatin	Unknown	NA	0
HMDB0034259	C05669	3-Nitropropionic Acid	Food related	Food related(FooDB:FDB012579 HMDB:HMDB0034259 T3DB:T3D3724)	0
HMDB0011664	NA	3-Methylene-Indolenine	Food related	Food related(FooDB:FDB028355)	0
HMDB0011600	C00913	3-Methyladenine	Food related; Drug related	Food related(FooDB:FDB028311 HMDB:HMDB0011600); Drug related(DrugBank:DB04104)	0
NA	NA	3-Methyl-7-[(3-Methylphenyl)Methyl-8-Nonylthio-1,3,7-Trihydropurine-2,6-Dione	Unknown	NA	1
HMDB0112086	NA	3-Methyl-5-Pentyl-2-Furanpentanoic Acid	Unknown	NA	0
HMDB0000021	C02515	3-Iodotyrosine	Host; Microbiota; Food related; Drug related	Microbiota(KEGG:C02515); Food related(FooDB:FDB021875); Drug related(DrugBank:DB01758)	1
NA	NA	3-Indol-3-Yl-2-{[(7-Methyl-3-Oxo(2H,4H-Benzo[3,4-E1,4-Oxazaperhydroin-6-Yl))S UlfonylAmino}Propanoic Acid	Unknown	NA	0
NA	NA	3-Indol-3-Yl-2-[(4-Methoxyphenyl)CarbonylaminoPropanoic Acid	Unknown	NA	0
HMDB0061654	NA	3-Hydroxyundecanoic Acid	Unknown	NA	0
HMDB0061655	NA	3-Hydroxytridecanoic Acid	Food related	Food related(HMDB:HMDB0061655)	0
HMDB0061656	NA	3-Hydroxytetradecanoic Acid	Food related	Food related(HMDB:HMDB0061656)	0
HMDB0000350	NA	3-Hydroxysebacic Acid	Food related	Food related(FooDB:FDB021973)	0
HMDB0061657	NA	3-Hydroxypentadecanoic Acid	Food related	Food related(HMDB:HMDB0061657)	0
NA	NA	3-Hydroxy-N-(1-Hydroxy-4-Methylpentan-2-Yl)-5-Oxo-6-Phenylhexanamide	Unknown	NA	1
HMDB0060655	C16560	3-Hydroxylidocaine	Host; Microbiota	Microbiota(BIGG:3hlido)	0
HMDB0061189	NA	3-Hydroxyisovalerylcarnitine	Food related	Food related(HMDB:HMDB0061189)	0
HMDB0061658	NA	3-Hydroxyhexadecanoic Acid	Food related	Food related(HMDB:HMDB0061658)	0
HMDB0013127	NA	3-Hydroxybutyrylcarnitine	Food related	Food related(FooDB:FDB029300 HMDB:HMDB0013127)	0
HMDB0029171	NA	3-Hydroxyadipic Acid 3,6-Lactone	Food related	Food related(FooDB:FDB111656)	0
NA	NA	3-Hydroxy-6-[[(E)-3-Hydroxy-2,4-Dimethylhept-4-EnoylAmino-2,4-Dimethyl-5-Oxohexanoic Acid	Unknown	NA	1
HMDB0040756	NA	3-Hydroxy-6,8-Dimethoxy-7(11)-Eremophilen-12,8-Olide	Food related	Food related(FooDB:FDB020570 HMDB:HMDB0040756)	0
NA	NA	3-Hydroxy-6,6-Dimethyl-2-(3,4,5-Trimethoxyphenyl)-3,5,6,7-Tetrahydrobenzimidaz Ol-4-One	Unknown	NA	1
HMDB0029170	NA	3-Hydroxy-4-Methoxymandelate	Unknown	NA	0
NA	NA	3-Hydroxy-4-Methoxy-2,3-Dihydropyran-6-One	Unknown	NA	0
NA	NA	3-Hydroxy-4-(Succin-2-Yl)-Caryolane Delta-Lactone	Unknown	NA	0
HMDB0006955	C04604	3-Hydroxy-2-Methylpyridine-4,5-Dicarboxylate	Microbiota; Food related	Microbiota(KEGG:C04604); Food related(FooDB:FDB024161)	0
HMDB0032994	NA	3-Hydroxy-2H-Pyran-2-One	Food related	Food related(FooDB:FDB010983 HMDB:HMDB0032994)	0
NA	NA	3-Hydroxy-1,5-Diphenyl-1-Pentanone	Unknown	NA	1
HMDB0060371	C02514	3-Fumarylpyruvate	Host; Microbiota	Microbiota(KEGG:C02514)	0
HMDB0246093	NA	3-Deoxyinosine	Unknown	NA	1
HMDB0240312	C05822	3-Cytidylic Acid	Microbiota; Drug related	Microbiota(BIGG:3cmp ChEBI:53013 KEGG:C05822); Drug related(DrugBank:DB01961)	0
HMDB0061112	NA	3-Carboxy-4-Methyl-5-Propyl-2-Furanpropionic Acid	Food related; Drug related	Food related(FooDB:FDB093609 HMDB:HMDB0061112 T3DB:T3D4197); Drug related(DrugBank:DB07517)	0
HMDB0061643	NA	3-Carboxy-4-Methyl-5-Pentyl-2-Furanpropanoic Acid	Food related	Food related(HMDB:HMDB0061643)	0
HMDB0038949	NA	3Beta,6Beta-Dihydroxynortropane	Food related	Food related(FooDB:FDB018428 HMDB:HMDB0038949)	0
HMDB0245820	NA	3-Aminopicolinaldehyde	Unknown	NA	0
HMDB0245805	NA	3-Amino-2,2-Dimethylpropanoic Acid	Unknown	NA	1
HMDB0034889	NA	3Alpha,4,7,7Alpha-Tetrahydro-4-Hydroxy-1H-Isoindole-1,3(2H)-Dione	Food related	Food related(FooDB:FDB013465 HMDB:HMDB0034889)	0
HMDB0003540	C01367	3-Adenylic Acid	Microbiota; Food related	Microbiota(BIGG:3amp ChEBI:28931 KEGG:C01367); Food related(FooDB:FDB023193)	0
HMDB0000331	C01921	3A,7B,12A-Trihydroxyoxocholanyl-Glycine	Host; Food related	Food related(FooDB:FDB021956 HMDB:HMDB0000331)	0
HMDB0240587	C06193	3-GMP	Microbiota; Drug related	Microbiota(BIGG:3gmp ChEBI:28072 KEGG:C06193); Drug related(DrugBank:DB03315)	0
NA	NA	3-[4-({2-[(2E)-2-Buten-2-Yl-6,8-Dimethyl-1,2,4A,5,6,7,8,8A-Octahydro-1-Naphthalenyl}Carbonyl)-3-Hydroxy-5-Oxo-2,5-Dihydro-1H-Pyrrol-2-Yl-2-Hydroxy-2-Methylpropanoic Acid	Unknown	NA	0
HMDB0041277	NA	3-[3-Carboxy-2,3-Dihydro-2-(4-Hydroxy-3-Methoxyphenyl)-7-Methoxy-5-Benzofuranyl-2-Propenoic Acid	Food related	Food related(FooDB:FDB021189 HMDB:HMDB0041277)	0
NA	NA	3-[2-(2,3-Dihydroxy-5,6,8A-Trimethyloctahydro-2H-Spiro[Naphthalene-1,2-Oxiran-5-Yl)Ethyl-5-Hydroxyfuran-2(5H)-One	Unknown	NA	0
HMDB0251665	C01341	3-[[1-[4-(Diaminomethylideneamino)Butylamino-4-Methyl-1-Oxopentan-2-YlCarbamoylOxirane-2-Carboxylic Acid	Drug related	Drug related(DrugBank:DB04276)	1
NA	NA	3-[(4-Hydroxyphenyl)Methyl-2,3,6,7,8,8A-Hexahydropyrrolo[1,2-APyrazine-1,4-Dione	Unknown	NA	0
NA	NA	3-[(2S,3R,4S,5S,6R)-4,5-Dihydroxy-3-[(2S,3R,4R,5R,6S)-3,4,5-Trihydroxy-6-Methyloxan-2-YlOxy-6-[[(2S,3R,4R,5R,6S)-3,4,5-Trihydroxy-6-Methyloxan-2-YlOxymethylOxan-2-YlOxy-5-Hydroxy-2-(4-Hydroxyphenyl)-6-Methoxy-7-[(2S,3R,4R,5R,6S)-3,4,5-Trihydroxy-6-Methyloxan-2-YlOxychromen-4-One	Unknown	NA	1
NA	NA	3-[(2S,3R,4S,5R,6R)-4-[(2S,3R,4S,5S,6R)-4,5-Dihydroxy-6-(Hydroxymethyl)-3-[(2S,3R,4S,5R)-3,4,5-Trihydroxyoxan-2-YlOxyoxan-2-YlOxy-3,5-Dihydroxy-6-(Hydroxymethyl)Oxan-2-YlOxy-2-(3,4-Dihydroxyphenyl)-5,7-Dihydroxychromen-4-One	Unknown	NA	1
NA	NA	3-[(2R,3S)-5-Hydroxy-2,3,8,8-Tetramethyl-4-Oxo-2,3-Dihydropyrano[2,3-HChromen-6-YlHexanoic Acid	Unknown	NA	1
HMDB0252169	NA	3,7,11-Trimethyldodeca-2,6,10-Trienoic Acid	Unknown	NA	0
HMDB0256256	NA	3,6,9,12-Tetraoxatetradecane-1,14-Diol	Unknown	NA	0
HMDB0244908	NA	3,5-Dihydroxyphenylglycine	Unknown	NA	0
NA	NA	3,5-Dihydroxydecanoic Acid	Unknown	NA	0
NA	NA	3,5-Dihydroxy-4-[3,4,5-Trihydroxy-6-[[4-(2-Hydroxypropan-2-Yl)Cyclohexene-1-CarbonylOxymethylOxan-2-YlOxybenzoic Acid	Unknown	NA	1
HMDB0246113	NA	3,5-Dideoxythymidine	Unknown	NA	0
NA	NA	3,5,7,10,15-O-Pentacetyl-14-O-Benzoyl-10,18-Dihydromyrsinol	Unknown	NA	0
HMDB0059729	NA	3,4-Methylenesebacic Acid	Food related	Food related(HMDB:HMDB0059729)	0
HMDB0001866	C05580	3,4-Dihydroxymandelic Acid	Host; Microbiota; Food related	Microbiota(KEGG:C05580); Food related(FooDB:FDB030383 HMDB:HMDB0001866)	0
HMDB0246030	NA	3,4-Dihydropyridine	Unknown	NA	0
HMDB0246022	NA	3,4-Diaminopyridine	Drug related	Drug related(DrugBank:DB11640)	0
NA	NA	3,3,4,4,5,5,6,6,7,7,8,8,9,9,9-Pentadecafluorononan-1-Ol	Unknown	NA	0
NA	NA	3,3,3-Trifluoro-1-Propanol	Unknown	NA	0
HMDB0002302	NA	3-(Indol-3-Yl)Propionic Acid	Microbiota; Food related; Drug related	Microbiota(HMDB:HMDB0002302); Food related(FooDB:FDB000941 HMDB:HMDB0002302); Drug related(DrugBank:DB02758)	1
NA	NA	3-(Dodecanoylamino)Propyl(Carboxymethyl)Dimethylammonium	Unknown	NA	0
NA	NA	3-(6,7-Dimethoxy-1,2,3,4-Tetrahydroisoquinolin-1-Yl)Propan-1-Ol	Unknown	NA	0
NA	NA	3-(5,9-Dimethyl-4-Oxo-8-Oxatetracyclo[7.2.1.1~7,10~.0~1,6~Tridec-2-En-5-Yl)Propanoic Acid	Unknown	NA	0
NA	NA	3-(5,7-Dimethoxy-4-Oxochromen-2-Yl)Propanoic Acid	Unknown	NA	1
NA	NA	3-(4-Hydroxyphenyl)Propanoic Acid 3-(4-Hydroxy-3-Methoxyphenyl)Propyl Ester	Unknown	NA	1
NA	NA	3-(2-Hydroxyethyl)-1H,3H-Quinazoline-2,4-Dione	Unknown	NA	1
NA	NA	3-(2-Hydroxy-3-Methoxyphenyl)-1,5-Dimethyl-4,6-Dioxo-1,2,3,5,3A,6A-Hexahydro-2 ,5-Diazapentalenecarboxylic Acid	Unknown	NA	1
HMDB0246116	NA	3(2H)-Pyridazinone	Unknown	NA	0
HMDB0032918	NA	3-(2-Furanyl)-2-Propenal	Food related	Food related(FooDB:FDB010901 HMDB:HMDB0032918)	0
NA	NA	3-(2,6-Dihydroxyphenyl)-4-Hydroxy-6-Methyl-3H-2-Benzofuran-1-One	Unknown	NA	0
NA	NA	3-(12-Hydroxy-5,9-Dimethyl-4-Oxo-8-Oxatetracyclo[7.2.1.1~7,10~.0~1,6~Tridec-2-En-5-Yl)Propanoic Acid	Unknown	NA	0
HMDB0245325	NA	2-Vinylpyridine	Unknown	NA	0
HMDB0247125	NA	2-Pyrazinoylguanidine	Unknown	NA	0
HMDB0002035	C00811	2-Propenoic Acid, 3-(4-Hydroxyphenyl)-, (2Z)-	Microbiota; Food related; Drug related	Microbiota(BIGG:T4hcinnm HMDB:HMDB0002035 KEGG:C00811); Food related(FooDB:FDB002593 HMDB:HMDB0002035); Drug related(DrugBank:DB04066)	0
HMDB0258301	C05610	2-Propenal, 3-(4-Hydroxy-3,5-Dimethoxyphenyl)-	Food related	Food related(FooDB:FDB001515)	0
HMDB0000362	NA	2-Phosphoglycerate	Microbiota; Food related; Drug related	Microbiota(BIGG:2pg); Food related(FooDB:FDB023161); Drug related(DrugBank:DB01709)	0
HMDB0303058	NA	2-Phenylethyl 6-O-(6-Deoxy-Alpha-L-Mannopyranosyl)-Beta-D-Glucopyranoside	Food related	Food related(FooDB:FDB007546)	1
NA	NA	2-Phenylethyl 4-(3-Ethoxy-4-Hydroxyphenyl)-7-(4-Methoxyphenyl)-2-Methyl-5-Oxo- 1,4,6,7,8-Pentahydroquinoline-3-Carboxylate	Unknown	NA	1
NA	NA	2-Oxo-1H-Quinoline-4-Carboxylic Acid	Unknown	NA	1
HMDB0061918	C12312	2-Oxindole	Unknown	NA	0
HMDB0240328	NA	2-O-Methyluridine	Unknown	NA	0
NA	NA	2-O-Methylinosine	Unknown	NA	0
NA	NA	2-O-Methylguanosine	Unknown	NA	0
NA	NA	2-O-Methyl-5-Methyluridine	Unknown	NA	1
NA	NA	2-O-Methyl-5-Methylcytidine	Unknown	NA	1
HMDB0255446	C16202	2-Naphthalenesulfonic Acid	Drug related	Drug related(DrugBank:DB08254)	0
NA	NA	2-Methylpyrrolidine	Unknown	NA	1
HMDB0061888	C14447	2-Methylpyridine	Food related	Food related(FooDB:FDB004399)	0
HMDB0001873	C02632	2-Methylpropanoic Acid	Microbiota; Food related; Drug related	Microbiota(BIGG:ibt ChEBI:16135 HMDB:HMDB0001873 KEGG:C02632); Food related(FooDB:FDB003277 HMDB:HMDB0001873); Drug related(DrugBank:DB02531)	0
HMDB0000379	NA	2-Methylcitric Acid	Microbiota; Food related	Microbiota(BIGG:2mcit); Food related(FooDB:FDB021997)	0
HMDB0033001	NA	2-Methylbenzothiazole	Food related	Food related(FooDB:FDB010990 HMDB:HMDB0033001)	0
HMDB0029636	C07214	2-Methylbenzaldehyde	Microbiota; Food related	Microbiota(KEGG:C07214); Food related(FooDB:FDB000806 HMDB:HMDB0029636)	0
HMDB0003771	NA	2-Methylacetoacetic Acid	Food related	Food related(FooDB:FDB023226 HMDB:HMDB0003771)	0
HMDB0031158	NA	2-Methyl-4-Pentenoic Acid	Food related	Food related(FooDB:FDB003172 HMDB:HMDB0031158)	0
HMDB0001172	C00349	2-Methyl-3-Oxopropanoic Acid	Host; Microbiota; Food related	Microbiota(BIGG:2mop KEGG:C00349); Food related(FooDB:FDB022464)	0
NA	NA	2-Methoxyethyl 5-Hydroxy-2-Methyl-1-{3-[(4-Nitrophenyl)AminoPropyl}Benzo[GIn Dole-3-Carboxylate	Unknown	NA	1
NA	NA	2-Methoxy-6-[(Triphenylmethoxy)Methyl-2H-3,4,5,6-Tetrahydropyran-3,4,5-Triol	Unknown	NA	0
HMDB0245199	NA	2-Methoxy-3,4-Dimethylphenyl Acetate	Unknown	NA	0
HMDB0000402	C02504	2-Isopropylmalic Acid, (S)-(+)-	Microbiota; Food related	Microbiota(BIGG:3c3hmp HMDB:HMDB0000402 KEGG:C02504); Food related(FooDB:FDB030115 HMDB:HMDB0000402)	1
HMDB0000402	C02504	2-Isopropylmalic Acid	Microbiota; Food related	Microbiota(BIGG:3c3hmp HMDB:HMDB0000402 KEGG:C02504); Food related(FooDB:FDB030115 HMDB:HMDB0000402)	1
HMDB0013751	C02502	2-Hydroxypyridine	Microbiota	Microbiota(ChEBI:16540)	0
HMDB0000729	C21297	2-Hydroxyisobutyric Acid	Food related	Food related(FooDB:FDB022207)	0
HMDB0031057	NA	2-Hydroxyhexadecanoic Acid	Food related	Food related(HMDB:HMDB0031057)	0
HMDB0000694	C03196	2-Hydroxyglutaric Acid, (S)-	Microbiota; Food related	Microbiota(BIGG:S2hglut KEGG:C03196); Food related(FooDB:FDB022185 HMDB:HMDB0000694 T3DB:T3D4247)	1
HMDB0059594	C19970	2-Hydroxy-Damp	Unknown	NA	0
HMDB0062676	NA	2-Hydroxyacrylic Acid	Unknown	NA	0
HMDB0245149	NA	2-Hydroxyacetamide	Unknown	NA	0
HMDB0038055	NA	2-Hydroxy-7-Methoxy-2H-1,4-Benzoxazin-3(4H)-One	Food related	Food related(FooDB:FDB017266 HMDB:HMDB0038055)	1
HMDB0031713	NA	2-Hydroxy-4-Imino-2,5-Cyclohexadienone	Food related	Food related(HMDB:HMDB0031713)	0
HMDB0254881	NA	2-Hydroxy-3-Morpholinopropanesulfonic Acid	Unknown	NA	0
HMDB0033624	NA	2-Hydroxy-3-(2-Hydroxyphenyl)Propanoic Acid	Food related	Food related(FooDB:FDB011712 HMDB:HMDB0033624)	0
HMDB0001987	NA	2-Hydroxy-2-Methylbutyric Acid	Food related	Food related(FooDB:FDB022784 HMDB:HMDB0001987)	0
HMDB0059758	C02488	2-Hydroxy-2-Ethylsuccinic Acid	Food related	Food related(HMDB:HMDB0059758)	0
NA	NA	2-Hydroxy-2-[2-Oxo-2-[(4,7,7-Trimethyl-3-Bicyclo[2.2.1Heptanyl)OxyEthylButanedioic Acid	Unknown	NA	1
NA	NA	2H-Pyrido[1,2-A[1,4,7,10Tetraazacyclododecine-1,4,7,10(3H,12H)-Tetrone, 3-(7,8-Dihydroxy-6-Oxooctyl)Octahydro-9-(1-Methylpropyl)-6-(Phenylmethyl)-	Unknown	NA	1
NA	NA	2H-Furo[3,2-BNaphtho[2,3-G[1,5Dioxonin-5,12-Dione, 2-[[6-O-[(2E)-3-[4-[(6-Deoxyhexopyranosyl)OxyPhenyl-1-Oxo-2-Propen-1-YlHexopyranosylOxy-3,3A,5A,6,14,14A-Hexahydro-3,8-Dihydroxy-2-(Hydroxymethyl)-6-(4-Hydroxyphenyl)-7,9-Dimethoxy-	Unknown	NA	0
HMDB0244873	NA	2H-Benzotriazole	Unknown	NA	1
HMDB0245134	NA	2-Furancarboximidamide	Unknown	NA	1
NA	NA	2-Furanacetic Acid, Tetrahydro-Alpha-Methyl-5-(2-Oxopropyl)-, 2,3-Dihydroxypropyl Ester	Unknown	NA	0
HMDB0245117	NA	2-Ethylaniline	Unknown	NA	0
HMDB0245114	NA	2-Ethyl-3-Hydroxy-2,4,4-Trimethyloxazolidine	Unknown	NA	0
HMDB0001975	NA	2-Ethyl-2-Hydroxybutyric Acid	Food related	Food related(FooDB:FDB022773 HMDB:HMDB0001975)	0
HMDB0245528	NA	2-Desoxyuridine	Unknown	NA	1
HMDB0001044	C00362	2-Deoxyguanosine 5-Phosphate	Host; Microbiota; Food related; Drug related	Microbiota(BIGG:dgmp ChEBI:16192 KEGG:C00362); Food related(FooDB:FDB022388); Drug related(DrugBank:DB04457)	0
HMDB0001031	C00673	2-Deoxy-D-Ribose 5-Phosphate	Host; Microbiota; Food related	Microbiota(BIGG:2dr5p KEGG:C00673); Food related(FooDB:FDB022380)	0
HMDB0245534	NA	2-Deoxyadenosine 3-Monophosphate	Unknown	NA	1
HMDB0000905	C00360	2-Deoxy-5-Adenosine Monophosphate	Host; Microbiota; Food related	Microbiota(BIGG:damp ChEBI:17713 KEGG:C00360); Food related(FooDB:FDB022311)	1
NA	NA	2-Decyl-3-Hydroxypentanedioic Acid	Unknown	NA	0
HMDB0245092	NA	2-Cyclopenten-1-One	Unknown	NA	0
HMDB0245084	NA	2-Cyanoacetamide	Unknown	NA	1
HMDB0011692	C03104	2-CMP	Food related; Drug related	Food related(FooDB:FDB028379); Drug related(DrugBank:DB03765)	0
NA	NA	2-Butanone, 4-[3-(Beta-D-Glucopyranosyloxy)-4-Hydroxy-2,6,6-Trimethyl-1-Cyclohexen-1-Yl-	Unknown	NA	0
HMDB0004666	C13856	2-Arachidonoylglycerol	Food related	Food related(FooDB:FDB023394 HMDB:HMDB0004666)	0
HMDB0245025	NA	2-Aminopurine	Unknown	NA	0
HMDB0001906	C03665	2-Aminoisobutyric Acid	Food related; Drug related	Food related(FooDB:FDB022732); Drug related(DrugBank:DB02952)	0
HMDB0247150	NA	2-Amino-6-Nitrobenzothiazole	Unknown	NA	0
HMDB0244994	NA	2-Amino-5-(Amino-Dimethylamino-Methylidene)Amino-Pentanoic Acid	Unknown	NA	0
HMDB0000252	C00319	2-Amino-4-Octadecene-1,3-Diol	Host; Microbiota; Food related; Drug related	Microbiota(KEGG:C00319); Food related(FooDB:FDB005463 HMDB:HMDB0000252); Drug related(DrugBank:DB03203)	0
NA	NA	26-Deoxycimicifugoside	Unknown	NA	1
NA	NA	20Beta-Hydroxyecdysone	Unknown	NA	0
NA	NA	2-{4-[4-{3,5-Dihydroxy-4-[3,4,5-Trihydroxy-6-(Hydroxymethyl)Oxan-2-YlPhenyl}-2,5-Bis(4-Hydroxyphenyl)Oxolan-3-Yl-2,6-Dihydroxyphenyl}-6-(Hydroxymethyl)Oxane-3,4,5-Triol	Unknown	NA	0
NA	NA	2-{1-[(4-Chlorophenyl)Carbonyl-5-Methoxy-2-Methylindol-3-Yl}-N-(5-Ethyl(1,3,4 -Thiadiazol-2-Yl))Acetamide	Unknown	NA	0
NA	NA	2-{1-[(4-Chlorophenyl)Carbonyl-5-Methoxy-2-Methylindol-3-Yl}-N-(2-Pyridylmeth Yl)Acetamide	Unknown	NA	1
NA	NA	2-{[(4-Methylphenyl)SulfonylAmino}-4-Methylthiobutanoic Acid	Unknown	NA	0
NA	NA	2-[Bisbenzylamino-1-(4-Hydroxy-3-Methoxyphenyl)Ethan-1-One, Chloride	Unknown	NA	1
NA	NA	2-[6-Hydroxy-2-(4-Hydroxy-3-Methoxyphenyl)-3-Azabicyclo[4.4.0Dec-3-Yl-N-(4-M Ethylphenyl)Acetamide	Unknown	NA	1
NA	NA	2-[6-Hydroxy-2-(3,4,5-Trimethoxyphenyl)-3-Azabicyclo[4.4.0Dec-3-Yl-N-(4-Meth Oxyphenyl)Acetamide	Unknown	NA	1
NA	NA	2-[5-[2-[2-[5-[2-[2-[5-[2-[2-[5-(2-Hydroxybutyl)Oxolan-2-YlPropanoyloxyPropylOxolan-2-YlPropanoyloxyPropylOxolan-2-YlPropanoyloxyPropylOxolan-2-YlPropanoic Acid	Unknown	NA	0
NA	NA	2-[5-[2-[2-[5-(2-Hydroxybutyl)Oxolan-2-YlPropanoyloxyButylOxolan-2-YlPropanoic Acid	Unknown	NA	1
NA	NA	2-[4-Hydroxy-2,5-Bis(Hydroxymethyl)-2-[3,4,5-Trihydroxy-6-(Hydroxymethyl)Oxan-2-YlOxyoxolan-3-YlOxy-6-(Hydroxymethyl)Oxane-3,4,5-Triol	Unknown	NA	1
NA	NA	2-[3-Oxo-2-[5-[3,4,5-Trihydroxy-6-(Hydroxymethyl)Oxan-2-YlOxypent-2-EnylCyclopentylAcetic Acid	Unknown	NA	1
NA	NA	2-[3-[4-[1,3-Dihydroxy-1-(4-Hydroxy-3-Methoxyphenyl)Propan-2-YlOxy-3-MethoxyphenylPropoxy-6-(Hydroxymethyl)Oxane-3,4,5-Triol	Unknown	NA	1
NA	NA	2-[2-Oxo-4-(Piperidylcarbonyl)Hydroquinolyl-N-(2,4,6-Trimethylphenyl)Acetamid E	Unknown	NA	1
HMDB0029083	NA	2-[2-Amino-3-(1H-Indol-3-Yl)PropanamidoAcetic Acid	Food related	Food related(FooDB:FDB112088)	1
NA	NA	2-[2-[(Z)-Pent-2-Enyl-3-[3,4,5-Trihydroxy-6-(Hydroxymethyl)Oxan-2-YlOxycyclopentylAcetic Acid	Unknown	NA	1
NA	NA	2-[1-[4,5-Dihydroxy-3-[(2S,3R,4S,5S,6R)-3,4,5-Trihydroxy-6-(Hydroxymethyl)Oxan-2-YlOxyoxan-2-YlIndol-3-YlAcetic Acid	Unknown	NA	0
NA	NA	2-[1-(4-Methoxyphenyl)(1,2,3,4-Tetrahydrobeta-Carbolin-2-Yl)-N-Naphthylacetam Ide	Unknown	NA	0
NA	NA	2-[(2E,5E,7E,11E)-10-Hydroxy-3,7,9,11-Tetramethyl-2,5,7,11-Tridecatetraen-1-Yl-5,6-Dimethoxy-3-Methyl-4-Pyridinyl 6-Deoxy-Alpha-L-Mannopyranoside	Unknown	NA	1
NA	NA	2-[(2E)-3,7-Dimethylocta-2,6-Dienyl-3-Methoxy-5-(2-Phenylethyl)Phenol	Unknown	NA	0
NA	NA	2,7-Octadienoic Acid, 6-Hydroxy-2,6-Dimethyl-, (1Ar,1Bs,2S,5As,6R,6As)-2-(Beta-D-Glucopyranosyloxy)-1A,1B,2,5A,6,6A-Hexahydro-5A-Hydroxy-1A-Methyloxireno[4,5Cyclopenta[1,2-CPyran-6-Yl Ester, (2E,6S)-	Unknown	NA	0
NA	NA	2,7-Naphthalenedisulfonic Acid	Unknown	NA	0
HMDB0060677	C11004	2,6-Xylidine	Microbiota; Environment	Microbiota(BIGG:26dmani); Environment(HMDB:HMDB0060677 T3DB:T3D4218)	0
NA	NA	2,6-Di-Tert-Butyl-4-Nitrophenol	Unknown	NA	0
HMDB0246998	NA	2,6-Diamino-9-(2-Hydroxyethoxymethyl)Purine	Unknown	NA	0
HMDB0245496	NA	2,5-Dihydro-1H-Pyrrole-2-Carboxylic Acid	Unknown	NA	0
NA	NA	2,4-Di-O-Methylolivetonide	Unknown	NA	0
NA	NA	2,4-Dimethylbenzenesulfonic Acid	Unknown	NA	0
NA	NA	2,4-Dihydroxy-5-Methoxy-2A,5A,7-Trimethyldodecahydrodispiro[Furan-3,2-Furan-5,6-Naphtho[1,8-BcFuran-2(2AH)-One	Unknown	NA	0
NA	NA	2,4-Dihydroxy-4-[(1E)-3-Hydroxy-1-Buten-1-Yl-3,5,5-Trimethylcyclohexyl Beta-D-Glucopyranoside	Unknown	NA	1
NA	C06670	2,4-Dichlorobenzoic Acid	Microbiota	Microbiota(ChEBI:30748)	0
NA	NA	2,4A,6-Trihydroxy-8-Isopropyl-1,1-Dimethyl-2,3,4,4A,5,10,11,11A-Octahydro-1H-Dibenzo[A,D[7Annulen-7-Yl Beta-D-Glucopyranoside	Unknown	NA	0
NA	NA	2,3-Dihydroxypropyl 9,12,15-Octadecatrienoate	Unknown	NA	0
NA	NA	2,3-Dihydro-1H-Carbazol-4(9H)-One	Unknown	NA	0
NA	NA	2,3-Dideoxyuridine	Unknown	NA	0
HMDB0245544	NA	2,3-Dideoxyadenosine	Unknown	NA	1
NA	NA	2,3,4-Tris[[(E)-3-(3,4-Dihydroxyphenyl)Prop-2-EnoylOxy-5-(2-Methylpropanoyloxy)Hexanedioic Acid	Unknown	NA	0
NA	NA	2,3,4,6-Tetrahydroxy-5-Oxo-5H-Benzo[7Annulene-8-Carboxylic Acid	Unknown	NA	0
HMDB0246655	NA	2,3,3-Trimethylbenzoindolenine	Unknown	NA	1
NA	NA	2,3,3,4,4,4-Hexafluorobutanoic Acid	Unknown	NA	0
HMDB0245570	C16500	2,3,14-Trihydroxy-10,13-Dimethyl-17-(2,3,6,7-Tetrahydroxy-6-Methylheptan-2-Yl)-2,3,4,5,9,11,12,15,16,17-Decahydro-1H-Cyclopenta[APhenanthren-6-One	Unknown	NA	1
HMDB0011691	C00127	2,3 Cyclic-Cmp	Host; Microbiota; Food related; Drug related	Microbiota(BIGG:gthox ChEBI:17858 KEGG:C00127,D00031); Food related(FooDB:FDB023147); Drug related(DrugBank:DB03310 KEGG:C00127,D00031)	0
HMDB0002074	NA	2,2-Dimethylsuccinic Acid	Food related	Food related(FooDB:FDB022833 HMDB:HMDB0002074)	1
HMDB0245345	NA	2,2,6,6-Tetramethylpiperidin-1-Ol	Unknown	NA	0
NA	NA	2,2,6,6-Tetramethyl-5-Hydroxy-4-(Alpha-Isopropyl-2,4,6-Trihydroxy-3-Isobutyrylbenzyl)-4-Cyclohexene-1,3-Dione	Unknown	NA	0
NA	NA	2,2,4,4,6,6-Hexamethoxy-1,1-Biphenyl	Unknown	NA	0
HMDB0303335	C10910	2-(Methylthio)Benzothiazole	Food related	Food related(FooDB:FDB011171)	0
NA	NA	2-(Methylethylidene)Butanedioic Acid	Unknown	NA	0
NA	NA	2-(Carbamimidoylsulfanyl)Ethanesulfonic Acid	Unknown	NA	0
NA	NA	2-(Benzimidazol-2-Ylmethylthio)-5,6-Dimethoxybenzimidazole	Unknown	NA	0
NA	NA	2-(Acetylamino)-N-Cyclopropyl-3-Indol-3-Ylpropanamide	Unknown	NA	1
NA	NA	2-(7-Hydroxy-6-Methyloctyl)-2H-Furan-5-One	Unknown	NA	0
HMDB0039332	NA	2-(6-P-Coumaroylglucosyl)Quercitrin	Food related	Food related(FooDB:FDB018885 HMDB:HMDB0039332)	0
HMDB0247583	NA	2-(6-Aminopurin-9-Yl)-5-(Hydroxymethyl)Oxolane-3,4-Diol	Unknown	NA	0
NA	NA	2-(4-Amino-4-Carboxybutanamido)-4-Methylpentanoic Acid	Unknown	NA	1
NA	NA	2-(4,5-Dibromo-6-Hydroxy-3-Oxoxanthen-9-Yl)Benzoic Acid	Unknown	NA	0
HMDB0000860	NA	2-(3-Phenylpropanamido)Acetic Acid	Food related	Food related(FooDB:FDB022286)	1
HMDB0002287	NA	2(3H)-Thiophenone, 3-Aminodihydro-, (S)-	Food related	Food related(FooDB:FDB022949)	0
HMDB0029886	NA	2-(3,4-Dihydroxyoxolan-2-Yl)-2-Hydroxyethyl (9E)-Octadec-9-Enoate	Food related; Environment	Food related(FooDB:FDB001121 HMDB:HMDB0029886 T3DB:T3D4854); Environment(HMDB:HMDB0029886 T3DB:T3D4854)	0
HMDB0251509	NA	2-(2-Aminopropanamido)-4-Methylpentanoic Acid	Unknown	NA	1
HMDB0028844	NA	2-(2-Aminoacetamido)-3-Methylpentanoic Acid	Food related	Food related(FooDB:FDB098410)	1
NA	NA	2-(2-Amino-3-Phenylpropanamido)-3-Methylbutanoic Acid	Unknown	NA	1
HMDB0028917	NA	2-(2-Amino-3-Methylpentanamido)-3-Hydroxybutanoic Acid	Food related	Food related(FooDB:FDB111945)	1
HMDB0028902	NA	2-(2-Amino-3-Methylpentanamido)-3-Carbamoylpropanoic Acid	Food related	Food related(FooDB:FDB111931)	1
HMDB0028738	NA	2-(2-Amino-3-Carbamoylpropanamido)-3-Phenylpropanoic Acid	Food related	Food related(FooDB:FDB111794)	1
NA	NA	2-(2,4-Difluorophenoxy)-N-{2-[2-Methyl-5-(Phenylmethoxy)Indol-3-YlEthyl}Aceta Mide	Unknown	NA	1
NA	NA	2-(2,3-Dimethyl-Phenylamino)-Nicotinic Acid	Unknown	NA	0
NA	NA	2(1H)-Azulenone, 6-(Beta-D-Glucopyranosyloxy)-4,5,6,7,8,8A-Hexahydro-5-Hydroxy-5-(1-Hydroxy-1-Methylethyl)-3,8-Dimethyl-	Unknown	NA	1
NA	NA	2-((7-Acetamido-1,2,3-Trimethoxy-9-Oxo-5,6,7,9-Tetrahydrobenzo[AHeptalen-10-Yl)Amino)-N-(Furan-2-Ylmethyl)-3-Methylbutanamide	Unknown	NA	0
NA	NA	2-((7-Acetamido-1,2,3-Trimethoxy-9-Oxo-5,6,7,9-Tetrahydrobenzo[AHeptalen-10-Yl)Amino)-N-(3-(3,4-Dimethoxyphenethyl)-1H-1,2,4-Triazol-5-Yl)-4-(Methylthio)Butanamide	Unknown	NA	0
NA	NA	2-((4-Ethyl-8,8-Dimethyl-2-Oxo-2,8,9,10-Tetrahydropyrano[2,3-FChromen-5-Yl)Oxy)-N-Isopropylacetamide	Unknown	NA	1
NA	NA	2-((2H-Pyrazolo[3,4-DPyrimidin-4-Yl)Amino)Ethanol	Unknown	NA	1
HMDB0014607	NA	1-Tetradecanol Hydrogen Sulfate	Drug related; Environment	Drug related(DrugBank:DB00464 T3DB:T3D4742); Environment(T3DB:T3D4742)	0
HMDB0034587	NA	1-Pyrrolidinecarboxaldehyde	Food related	Food related(FooDB:FDB013103 HMDB:HMDB0034587)	1
HMDB0031702	NA	1-Piperidinecarboxaldehyde	Food related; Drug related	Food related(FooDB:FDB008365 HMDB:HMDB0031702); Drug related(DrugBank:DB04113)	0
HMDB0032619	C07112	1-Phenylethanol	Food related	Food related(FooDB:FDB010561 HMDB:HMDB0032619)	0
HMDB0243989	NA	1-Pentyl-3-(1-Naphthoyl) Indole	Unknown	NA	0
HMDB0010382	C04102	1-Palmitoyl-Sn-Glycero-3-Phosphocholine	Microbiota; Food related	Microbiota(KEGG:C04230); Food related(FooDB:FDB027533 HMDB:HMDB0010382)	0
HMDB0007973	C00157	1-Palmitoyl-2-Linoleoyl-Sn-Glycero-3-Phosphocholine	Host; Food related; Drug related	Food related(FooDB:FDB030253 HMDB:HMDB0007973); Drug related(DrugBank:DB02306)	0
HMDB0243890	C13903	1-O-Hexadecyl-Sn-Glycero-3-Phosphocholine	Unknown	NA	0
HMDB0011130	C21484	1-Octadecanoyl-Sn-Glycero-3-Phosphoethanolamine	Microbiota; Food related	Microbiota(BIGG:1agpe180); Food related(FooDB:FDB027909 HMDB:HMDB0011130)	0
HMDB0243972	NA	1-Nonadecanoyl-Glycero-3-Phosphoserine	Unknown	NA	0
NA	NA	1-Naphthalenecarboxylic Acid, 3-(Acetyloxy)-5-[2-(3-Furanyl)Ethyl-3,4,4A,5,6,7,8,8A-Octahydro-8A-(Hydroxymethyl)-5,6-Dimethyl-	Unknown	NA	1
HMDB0003331	C02494	1-Methyladenosine	Food related	Food related(FooDB:FDB021791)	0
NA	NA	1-Methyl-3,4-Dihydro-2H-Pyrido[3,4-BIndole	Unknown	NA	0
HMDB0011729	C03661	1-Kestose	Food related	Food related(FooDB:FDB030249 HMDB:HMDB0011729)	0
NA	NA	1-Isopropyl-1,2,3,4,-Tetrahydro-Beta-Carboline-3-Carboxylic Acid	Unknown	NA	0
HMDB0031507	NA	1-Hydroxy-2-Butanone	Food related	Food related(FooDB:FDB008098 HMDB:HMDB0031507)	0
HMDB0036057	NA	1H-Pyrrole-2-Carboxaldehyde	Food related	Food related(FooDB:FDB014879 HMDB:HMDB0036057)	1
HMDB0244733	NA	1H-Indene-1,2(3H)-Dione	Unknown	NA	1
HMDB0003431	C00860	1H-Imidazole-4-Propanol, Beta-Amino-, (S)-	Microbiota; Food related; Drug related	Microbiota(BIGG:histd ChEBI:16255 KEGG:C00860); Food related(FooDB:FDB023173 HMDB:HMDB0003431); Drug related(DrugBank:DB03811)	0
HMDB0244880	NA	1H-Imidazole-4-Carboxamide	Unknown	NA	1
HMDB0062195	C04598	1-Hexadecyl-2-Acetyl-Glycero-3-Phosphocholine	Host; Food related; Drug related	Food related(HMDB:HMDB0062195); Drug related(DrugBank:DB02261)	0
HMDB0243876	NA	1-Ethylpiperazine	Unknown	NA	0
HMDB0240628	NA	1-Carboxyethylphenylalanine	Unknown	NA	0
HMDB0240707	C11033	1-Aminomethylphosphonic Acid	Drug related	Drug related(DrugBank:DB02057)	0
NA	NA	1-Allyl-2-Hydroxy-7,8,9,10-Tetrahydroazepino[2,1-BQuinazolin-12(6H)-One	Unknown	NA	0
HMDB0041287	NA	16-Hydroxy-10-Oxohexadecanoic Acid	Food related	Food related(FooDB:FDB021204 HMDB:HMDB0041287)	0
NA	NA	16-Butan-2-Yl-10,11,14-Trimethyl-13-Propan-2-Yl-3-Prop-2-Enyl-4-Oxa-1,8,11,14,17-Pentazabicyclo[17.3.0Docosane-2,5,9,12,15,18-Hexone	Unknown	NA	0
HMDB0252730	NA	16Beta-Hydroxydigitoxigenin	Unknown	NA	0
NA	NA	15,16-Dimethoxytricyclo[12.3.1.12,6Nonadeca-1(17),2,4,6(19),14(18),15-Hexaene-3,9,17-Triol	Unknown	NA	1
HMDB0249243	C03690	14C -Dehp	Food related	Food related(T3DB:T3D0076)	0
NA	NA	14-(Hydroxyethyl)-2,15-Dimethyltetracyclo[8.7.0.0<2,7.0<11,15Heptadec-7-En- 5-Yl Acetate	Unknown	NA	1
HMDB0004668	C14765	13-OxoODE	Microbiota; Food related	Microbiota(BIGG:13oocdcy1829Z11Ea ChEBI:68947); Food related(FooDB:FDB023396 HMDB:HMDB0004668)	0
NA	NA	13-O-P-Coumaroylplumieride	Unknown	NA	0
HMDB0244510	NA	13-Hydroxyoctadeca-9,12-Dienoic Acid	Unknown	NA	0
NA	C16316	13(S)-hot	Unknown	NA	1
NA	NA	12-Hydroxy-13-(Hydroxymethyl)-3,5,7-Trimethyl-2,4-Tetradecadienedioic Acid	Unknown	NA	0
HMDB0060101	NA	12 Hydroxy Arachidonic Acid	Food related	Food related(HMDB:HMDB0060101)	0
HMDB0030767	NA	11,12-Dimethoxydihydrokawain	Food related	Food related(HMDB:HMDB0030767)	0
NA	NA	10-Norparvulenone	Unknown	NA	0
NA	NA	10-Ethyl-14-Methyl-12-Oxa-4-Azatetracyclo[7.6.1.0,.0,Hexadecan-13-One	Unknown	NA	0
NA	NA	10,11-Dimethoxy-4A,5,5A,7,8,13A,15,15A,15B,16-Decahydro-2H-4,6-Methanoindolo[3,2,1-IjOxepino[2,3,4-DePyrrolo[2,3-HQuinoline-14-One	Unknown	NA	1
NA	NA	1-{2-[(2-Chlorophenyl)Methyl(1,2,3,4-Tetrahydrobeta-Carbolinyl)}-4-Methoxyben Zene	Unknown	NA	0
NA	NA	1-[4,5-Bis(Hydroxymethyl)-3-Methoxy-2-Methylphenoxy-3-Methylbutane-2,3-Diol	Unknown	NA	0
NA	NA	1-[4-(3,4-Dichlorophenyl)-6-(Trifluoromethyl)Pyrimidin-2-YlPyrrolidine-2-Carb Oxylic Acid	Unknown	NA	0
NA	NA	1,7-Dideacetoxy-1,7-Dioxo-3-Deacetylkhivorin	Unknown	NA	1
HMDB0244231	C19463	1,5-Naphthalenediamine	Unknown	NA	1
NA	NA	1,5-Dibutyl-3,6-Dihydro-2H-Pyridine	Unknown	NA	0
HMDB0040930	NA	1,5-Bis(4-Hydroxy-3-Methoxyphenyl)-1,4-Pentadien-3-One	Food related	Food related(FooDB:FDB020771 HMDB:HMDB0040930)	1
HMDB0244228	C16538	1,5-Anhydrosorbitol	Food related	Food related(FooDB:FDB030193)	0
NA	NA	1,4-Ethanonaphthalene-5,10-Dicarboxylic Acid, 1,4,4A,5,6,8A-Hexahydro-5,10-Dihydroxy-6,9-Dioxo-, Bis[[2-(Beta-D-Glucopyranosyloxy)-3-HydroxyphenylMethyl Ester	Unknown	NA	0
NA	NA	1,4-Cyclohexanedicarboxylic Acid	Unknown	NA	0
NA	NA	1,3-Dichloro-6,7,8,9,10,12-Hexahydroazepino[2,1-BQuinazoline	Unknown	NA	0
HMDB0244157	NA	1,3-Benzodioxole-5,6-Diamine	Unknown	NA	0
HMDB0002123	C16361	1,3,7-Trimethyluric Acid	Microbiota; Food related	Microbiota(KEGG:C16361); Food related(FooDB:FDB030187 HMDB:HMDB0002123)	0
NA	NA	1,3,7-Trimethyl-9-Hydroxy-9H-Purine-2,6,8(1H,3H,7H)-Trione	Unknown	NA	0
HMDB0251502	NA	1,3,5-Hexatriene	Unknown	NA	0
HMDB0254327	C08236	1,3,4,5,6,7-Hexahydroxyheptan-2-One	Food related	Food related(FooDB:FDB001201 HMDB:HMDB0029935)	0
HMDB0244082	NA	1,2-Dimethylimidazole	Unknown	NA	1
HMDB0244077	NA	1,2-Dihydroquinoline	Unknown	NA	0
HMDB0244075	NA	1,2-Dihydroisoquinoline	Unknown	NA	1
NA	NA	1,2-Dihexanoyl-Sn-Glycerol	Unknown	NA	0
HMDB0012133	C02351	1,2-Benzoquinone	Food related	Food related(FooDB:FDB004549 HMDB:HMDB0012133)	1
HMDB0059696	NA	1,2,3,4,Tetrahydro-1,5,7-Trimethylnapthalene	Unknown	NA	0
NA	NA	1,1-Dimethyl-4-Phenylpiperazinium	Unknown	NA	0
NA	NA	1-(Aminocarbonyl)-L-Proline	Unknown	NA	0
HMDB0002815	C03916	1-(9Z-Octadecenoyl)-Sn-Glycero-3-Phosphocholine	Food related	Food related(FooDB:FDB005287 HMDB:HMDB0002815)	0
HMDB0010386	C04100	1-(9Z,12Z-Octadecadienoyl)-Sn-Glycero-3-Phosphocholine	Food related	Food related(FooDB:FDB030316 HMDB:HMDB0010386)	0
NA	NA	1-(4-Acetamidobenzene-1-Sulfonyl)Proline	Unknown	NA	0
HMDB0243498	NA	1-(3-Carboxypropyl)-3,7-Dimethylxanthine	Unknown	NA	1
NA	NA	1-(2-Hydroxyethyl)-2,2,6,6-Tetramethyl-4-Hydroxypiperidine	Unknown	NA	0
NA	NA	1-(2,3-Dibenzimidazol-2-Ylpropyl)-2-Methoxybenzene	Unknown	NA	0
NA	NA	1-(2-(2H,3H-Benzo[3,4-E1,4-Dioxin-6-Yl)-2-Oxoethyl)Benzimidazole-2-Carbonitri Le	Unknown	NA	1
NA	NA	{6-[(2S)-5-Acetyloxy-2-(4-Acetyloxyphenyl)-4-Oxochroman-7-Yloxy-3,4,5-Triacet Yloxy-2H-3,4,5,6-Tetrahydropyran-2-Yl}Methyl (2E)-3-(4-Acetyloxyphenyl)Prop-2- Enoate	Unknown	NA	0
NA	NA	{4-[(4-Hydroxy-6-Propylpyrimidin-2-Ylthio)MethylPhenyl}-N-(3-Methylphenyl)Car Boxamide	Unknown	NA	1
NA	NA	{4,5-Dimethoxy-3-[(3,4,5-Trimethoxyphenyl)CarbonylaminoPhenyl}-N,N-Diethylcar Boxamide	Unknown	NA	1
NA	NA	[6-[6-[6-[4,5-Dihydroxy-6-[(2E,6E)-10-Hydroxy-2,6,10-Trimethyldodeca-2,6,11-Trienoxy-2-Methyloxan-3-YlOxy-4,5-Dihydroxy-2-Methyloxan-3-YlOxy-4,5-Dihydroxy-2-Methyloxan-3-YlOxy-4,5-Dihydroxy-2-Methyloxan-3-Yl Acetate	Unknown	NA	0
NA	NA	[5-Acetyloxy-3-(Hydroxymethyl)-2-Oxo-6-Propan-2-Ylcyclohex-3-En-1-Yl 3-Methylbutanoate	Unknown	NA	0
NA	NA	[4-[(3,5-Dimethylphenyl)CarbamoylaminoPhenyl Sulfamate	Unknown	NA	1
NA	NA	[4-(Phenylcarbonyl)Phenyl-N-[(3,4,5-Trimethoxyphenyl)MethylCarboxamide	Unknown	NA	0
NA	NA	[4-(2-1,2,3,4-Tetrahydroisoquinolylmethyl)Phenyl-N-(2-{[4-(2-1,2,3,4-Tetrahyd Roisoquinolylmethyl)PhenylCarbonylamino}Ethyl)Carboxamide	Unknown	NA	1
NA	NA	[3-Hydroxy-1-[3-Hydroxy-1-Oxo-1-(2,3,4,5,6-Pentahydroxyhexoxy)Decan-5-YlOxy-1-Oxodecan-5-Yl 3,5-Dihydroxydecanoate	Unknown	NA	1
NA	NA	[3,4-Dihydroxy-6-[5-Hydroxy-2-(4-Hydroxyphenyl)-4-Oxo-7-[3,4,5-Trihydroxy-6-(Hydroxymethyl)Oxan-2-YlOxychromen-3-YlOxy-5-[(2S,3R,4R,5R,6S)-3,4,5-Trihydroxy-6-Methyloxan-2-YlOxyoxan-2-YlMethyl Acetate	Unknown	NA	1
NA	NA	[2-[(Z)-Heptadec-9-EnoylOxy-3-Hexadecanoyloxypropyl 2-(Trimethylazaniumyl)Ethyl Phosphate	Unknown	NA	1
NA	NA	[1,3,12-Triacetyloxy-17-(Furan-3-Yl)-4,4,8,10,13-Pentamethyl-2,3,5,6,7,9,11,12,16,17-Decahydro-1H-Cyclopenta[APhenanthren-7-Yl 2-Hydroxy-3-Methylpentanoate	Unknown	NA	0
NA	NA	[(6Z,10Z)-6-(Acetyloxymethyl)-10-(Hydroperoxymethyl)-3-Methylidene-2-Oxo-3A,4,5,8,9,11A-Hexahydrocyclodeca[BFuran-4-Yl 2-Methylbutanoate	Unknown	NA	0
NA	NA	[(3As,6Z,10Z,11Ar)-6-(Hydroxymethyl)-3-Methylidene-2-Oxo-3A,4,5,8,9,11A-Hexahydrocyclodeca[BFuran-10-YlMethyl Acetate	Unknown	NA	0
NA	NA	[(3Ar,4R,5R,6Z,9Z,11Ar)-4-Hydroxy-6,10-Dimethyl-3-Methylidene-2,8-Dioxo-4,5,11,11A-Tetrahydro-3Ah-Cyclodeca[BFuran-5-Yl (Z)-2-Methylbut-2-Enoate	Unknown	NA	1
NA	NA	[(2S,3S,4R,5R,6R)-5-Acetyloxy-3-Hydroxy-2-Methyl-6-[[(2R,3S,4S,5R,6S)-3,4,5-Trihydroxy-6-[5-Hydroxy-6-Methoxy-2-(4-Methoxyphenyl)-4-Oxochromen-7-YlOxyoxan-2-YlMethoxyOxan-4-Yl Acetate	Unknown	NA	0
NA	NA	[(2R,3S,4S,5R,6S)-6-(3,4-Dihydroxybenzoyl)Oxy-3,4,5-Trihydroxyoxan-2-YlMethyl 3,4-Dihydroxybenzoate	Unknown	NA	1
NA	NA	[(2R,3S,4S,5R,6S)-3,4-Dihydroxy-6-[3,7,8-Trihydroxy-2-(4-Hydroxy-3-Methoxyphenyl)-4-Oxochromen-5-YlOxy-5-[(2S,3R,4R,5R,6S)-3,4,5-Trihydroxy-6-Methyloxan-2-YlOxyoxan-2-YlMethyl Acetate	Unknown	NA	0
NA	NA	[(2R,3S,4S,5R,6S)-3,4,5-Trihydroxy-6-[(2S,3R,4S,5S,6R)-3,4,5-Trihydroxy-6-(Hydroxymethyl)Oxan-2-YlOxyoxan-2-YlMethyl 8-Methylnonanoate	Unknown	NA	0
NA	NA	[(2R,3S,4S,5R,6R)-6-[1,7-Bis(4-Hydroxyphenyl)-5-Oxoheptan-3-YlOxy-3,4,5-Trihydroxyoxan-2-YlMethyl (E)-3-(4-Hydroxyphenyl)Prop-2-Enoate	Unknown	NA	1
NA	NA	[(2R,3S,4S,5R,6R)-6-[1,7-Bis(3,4-Dihydroxyphenyl)-5-Oxoheptan-3-YlOxy-3,4,5-Trihydroxyoxan-2-YlMethyl (E)-3-(3,4-Dimethoxyphenyl)Prop-2-Enoate	Unknown	NA	0
NA	NA	[(2R,3S,4S,5R,6R)-3,4,5-Trihydroxy-6-[(2R,3R,4S,5S,6R)-3,4,5-Trihydroxy-6-(Hydroxymethyl)Oxan-2-YlOxyoxan-2-YlMethyl 7-Methyloctanoate	Unknown	NA	1
NA	NA	[(2R,3R,4S,5S,6R)-3-Acetyloxy-2-(Acetyloxymethyl)-5-Hexanoyloxy-6-[(2S,3R)-2,3,4-TrihydroxybutoxyOxan-4-Yl 14-Hydroxytetradecanoate	Unknown	NA	1
NA	NA	[(2R)-1,1,2,3,3-Pentadeuterio-3-Heptadecanoyloxy-2-[(Z)-Tetradec-9-EnoylOxypropyl 2-(Trimethylazaniumyl)Ethyl Phosphate	Unknown	NA	1
NA	NA	[(1R,2S,4R,5S,6S,11R,12R,14S,16R)-5,6,11-Trihydroxy-4-(Hydroxymethyl)-8,12,15,15-Tetramethyl-7-Oxo-3-Oxapentacyclo[9.5.0.02,4.06,10.014,16Hexadec-8-En-14-Yl Dodecanoate	Unknown	NA	1
NA	NA	[(10Z)-6,10-Bis(Hydroxymethyl)-3-Methylidene-2-Oxo-3A,4,5,6,7,8,9,11A-Octahydrocyclodeca[BFuran-4-Yl 2-Methylprop-2-Enoate	Unknown	NA	0
NA	NA	(Z)-9,12,13-Trihydroxyoctadec-15-Enoic Acid	Unknown	NA	0
NA	NA	(Z)-3-(4-Hydroxyphenyl)-N-[4-[[(E)-3-(4-Hydroxyphenyl)Prop-2-EnoylAminoButylProp-2-Enamide	Unknown	NA	1
HMDB0036998	NA	(S)-Oleuropeic Acid	Food related	Food related(FooDB:FDB015972 HMDB:HMDB0036998)	0
NA	NA	(S)-Methyl 2-(3-(6,7-Dimethoxy-4-Oxoquinazolin-3(4H)-Yl)Propanamido)-3-Methylbutanoate	Unknown	NA	1
NA	NA	(S)-Curvularin	Unknown	NA	0
HMDB0030346	C09910	(S)-Actinidine	Microbiota; Food related	Microbiota(ChEBI:2443); Food related(FooDB:FDB002190 HMDB:HMDB0030346)	0
NA	NA	(R)-N-Acetyl-4-Naphthylalanine	Unknown	NA	1
HMDB0010737	NA	(R)-3-Hydroxy-Octadecanoic Acid	Food related	Food related(FooDB:FDB027884 HMDB:HMDB0010737)	0
HMDB0010728	NA	(R)-3-Hydroxydodecanoic Acid	Food related; Drug related	Food related(FooDB:FDB027875 HMDB:HMDB0010728); Drug related(DrugBank:DB07930)	0
HMDB0002264	NA	(R)-2-Hydroxycaprylic Acid	Food related	Food related(FooDB:FDB022934 HMDB:HMDB0002264)	0
NA	NA	(E)-5-Hydroxy-N-[3-[5-[3-[[(E)-5-Hydroxy-3-Methylpent-2-EnoylAminoPropyl-3,6-Dioxopiperazin-2-YlPropyl-3-Methylpent-2-Enamide	Unknown	NA	1
HMDB0033560	NA	(E)-5-(3,4,5,6-Tetrahydro-3-Pyridylidenemethyl)-2-Furanmethanol	Food related	Food related(FooDB:FDB011628 HMDB:HMDB0033560)	0
NA	NA	(E)-3-(Acetyloxymethyl)-5-(2-Formyl-4-Hydroxy-5,5,8A-Trimethyl-1,4,4A,6,7,8-Hexahydronaphthalen-1-Yl)Pent-2-Enoic Acid	Unknown	NA	0
HMDB0003033	D03363	(9S,14S)-10,13-Dimethylspiro[2,8,9,11,12,14,15,16-Octahydro-1H-Cyclopenta[APhenanthrene-17,5-Oxolane-2,3-Dione	Food related; Drug related	Food related(FooDB:FDB023096 HMDB:HMDB0003033); Drug related(DrugBank:DB12221 KEGG:D03363)	0
HMDB0040611	NA	(9R,10S,12Z)-9,10-Dihydroxy-8-Oxo-12-Octadecenoic Acid	Food related	Food related(FooDB:FDB020402 HMDB:HMDB0040611)	0
NA	NA	(7S,9E,11S,12R,13S,14S,15S,16R,17S,18S,19E,21Z)-13-(Acetyloxy)-15,17-Dihydroxy-11-Methoxy-3,7,12,14,16,18,22-Heptamethyl-6,23,27,29-Tetraoxo-8,30-Dioxa-24-Azatetracyclo[23.3.1.1^{4,7}.0^{5,28}Triaconta-1,3,5(28),9,19,21,25-Heptaen-2-Yl 4-Chlorobenzoa...	Unknown	NA	1
NA	NA	(6-Bromo-2-Oxochromen-3-Yl)-N-[(2-Iodophenyl)CarbonylaminoCarboxamide	Unknown	NA	1
NA	NA	(5S)-17-Hydroxy-10,13-Dimethyltetradecahydro-1H-Cyclopenta[APhenanthren-3(2H)-One	Unknown	NA	0
NA	NA	(5R)-5-Hydroxy-1-(4-Hydroxy-3-Methoxyphenyl)Decan-3-One	Unknown	NA	0
NA	NA	(5-Nitro(2-Pyridyl))[(3,4,5-Trimethoxyphenyl)MethylAmine	Unknown	NA	1
NA	NA	(5E)-10-Heptyl-3,4,5,8,9,10-Hexahydro-5,8,9-Trihydroxy-2H-Oxecin-2-One	Unknown	NA	1
NA	NA	(4S,5Z,6S)-4-(2-Methoxy-2-Oxoethyl)-5-[2-[(E)-3-Phenylprop-2-EnoylOxyethylidene-6-[(2S,3R,4S,5S,6R)-3,4,5-Trihydroxy-6-(Hydroxymethyl)Oxan-2-YlOxy-4H-Pyran-3-Carboxylic Acid	Unknown	NA	0
NA	NA	(4E)-1,7-Bis(4-Hydroxyphenyl)Hept-4-En-3-One	Unknown	NA	0
NA	NA	(4Beta,6Alpha)-8-Daucene-4,6-Diol	Unknown	NA	0
HMDB0062585	C04281	(3R,5S)-1-Pyrroline-3-Hydroxy-5-Carboxylic Acid	Host; Microbiota	Microbiota(BIGG:1p3h5c KEGG:C04281)	0
NA	NA	(3R,4R,6S,6As,8R,9R,10S,11S,11Ar,12R,13R)-11A-Acetoxy-4-(2-Chloroacetoxy)-1-Ethyl-9,11-Dihydroxy-6,10,13-Trimethoxy-3-(Methoxymethyl)Tetradecahydro-1H-3,6A,12-(Epiethane[1,1,2Triyl)-7,9-Methanonaphtho[2,3-BAzocin-8-Yl Benzoate	Unknown	NA	1
HMDB0061889	NA	(3E,5Z)-1,3,5-Heptatriene	Unknown	NA	0
NA	NA	(3E)-7-Hydroxy-3,7-Dimethyl-3-Octen-1-Yl 6-O-(6-Deoxy-Alpha-L-Mannopyranosyl)-Beta-D-Glucopyranoside	Unknown	NA	0
NA	NA	(3E)-3-Benzylidene-4-Methyl-1H-1,4-Benzodiazepine-2,5-Dione	Unknown	NA	1
NA	NA	(3Beta,5Xi,9Xi,13Xi,16Beta,17Xi,22R,23R,24R)-3-{[Alpha-L-Arabinofuranosyl-(1-2)-[Beta-D-Glucopyranosyl-(1-3)-Alpha-L-ArabinopyranosylOxy}-20-Hydroxy-24-Methyl-16,23:16,30-Diepoxydammar-25-En-22-Yl Acetate	Unknown	NA	0
NA	NA	(3Beta,5Alpha,9Xi)-3-{[Beta-D-Glucopyranosyl-(1-6)-Beta-D-Glucopyranosyl-(1-4)-6-Deoxy-3-O-Methyl-Beta-L-IdopyranosylOxy}-14-Hydroxy-19-Oxocard-20(22)-Enolide	Unknown	NA	0
NA	NA	(3,4-Dimethoxyphenyl)-N-[4-(Cyanomethyl)PhenylCarboxamide	Unknown	NA	1
NA	NA	(3,4-Dimethoxyphenyl)-N-[(4-Phenylpiperazinyl)MethylCarboxamide	Unknown	NA	1
NA	NA	(2S,4R,9Beta,16Alpha,17Xi,23E)-2-(Beta-D-Glucopyranosyloxy)-16,20-Dihydroxy-9,10,14-Trimethyl-1,11,22-Trioxo-4,9-Cyclo-9,10-Secocholesta-5,23-Dien-25-Yl Acetate	Unknown	NA	0
NA	NA	(2S,3S,4S,5R,6R)-6-[[(3S,6Ar,6Bs,8As,12As,14Br)-4,4,6A,6B,11,11,14B-Heptamethyl-8A-[(2S,3R,4S,5S,6R)-3,4,5-Trihydroxy-6-(Hydroxymethyl)Oxan-2-YlOxycarbonyl-1,2,3,4A,5,6,7,8,9,10,12,12A,14,14A-Tetradecahydropicen-3-YlOxy-3,5-Dihydroxy-4-[(2S,3R,4R,5R,6S)-3,4,5-Trihydroxy-6-Methyloxan-2-YlOxyoxane-2-Carboxylic Acid	Unknown	NA	0
NA	NA	(2S,3S)-3-Decyl-2-Hydroxy-2-(3-Methoxy-3-Oxopropyl)Butanedioic Acid	Unknown	NA	0
NA	NA	(2S)-2-[(Tert-Butoxy)Carbonylamino-3-[BenzyloxycarbonylPropanoic Acid	Unknown	NA	0
NA	NA	(2R,4S,5R)-4-[(2S,4S,5R)-4-[(2S,4S,5R)-4-[(2S,4S,5R)-3,5-Dihydroxy-6-(Hydroxymethyl)-4-[(2S,4R,5S)-3,4,5-Trihydroxy-6-(Hydroxymethyl)Oxan-2-YlOxyoxan-2-YlOxy-3,5-Dihydroxy-6-(Hydroxymethyl)Oxan-2-YlOxy-3,5-Dihydroxy-6-(Hydroxymethyl)Oxan-2-YlOxy-6-(Hydroxymethyl)Oxane-2,3,5-Triol	Unknown	NA	0
NA	NA	(2R,3S,4S,5S,6S)-2-(((2R,3R,4S,5S,6R)-2-Hydroxy-5-(((2R,3R,4R,5S,6R)-5-Hydroxy-4-(((2R,3R,4R,5S,6R)-3,4,5-Trihydroxy-6-(Hydroxymethyl)Tetrahydro-2H-Pyran-2-Yl)Oxy)-3-(((2R,3R,4R,5S)-3,4,5-Trihydroxytetrahydro-2H-Pyran-2-Yl)Oxy)-6-((((2R,3R,4S,5S)-3,4,...	Unknown	NA	0
NA	NA	(2R,3R,4S,5S,6R)-2-Octoxy-6-[[(2S,3R,4S,5R)-3,4,5-Trihydroxyoxan-2-YlOxymethylOxane-3,4,5-Triol	Unknown	NA	1
NA	NA	(2R,3R,11Bs)-2-[(6,7-Dimethoxy-3,4-Dihydroisoquinolin-1-Yl)Methyl-3-Ethyl-9,10-Dimethoxy-2,3,4,6,7,11B-Hexahydro-1H-Pyrido[2,1-AIsoquinoline	Unknown	NA	1
NA	NA	(2R)-2-[(2R,5S)-5-[(2S)-2-HydroxybutylOxolan-2-YlPropanoic Acid	Unknown	NA	0
NA	NA	(2R)-2-((2S,3R)-3-Methyl-2-((7S)-5-Oxo-7,8,13,13B-Tetrahydro-5H-Benzo[1,2Indolizino[8,7-BIndole-7-Carboxamido)Pentanamido)Propanoic Acid	Unknown	NA	0
NA	NA	(2-Isobutyrylamino-Acetylamino)-Acetic Acid	Unknown	NA	1
NA	NA	(2E,6E)-3,7,11,15,19,23,27,31,35-Nonamethylhexatriaconta-2,6,34-Triene-1,10,11,15,19,23,27,31-Octol	Unknown	NA	0
NA	NA	(2E,4E,14E)-13-Hydroperoxy-N-(2-Methylpropyl)Icosa-2,4,14-Trienamide	Unknown	NA	0
NA	NA	(2E,4E,14E)-13-Hydroperoxy-1-Piperidin-1-Ylicosa-2,4,14-Trien-1-One	Unknown	NA	0
NA	NA	(2E,4E)-N-[2-(4-Hydroxyphenyl)EthylDodeca-2,4-Dienamide	Unknown	NA	1
NA	NA	(2E)-3-[5-(3,4-Dichlorophenyl)(2-Furyl)-2-(2-1,2,3,4-Tetrahydroisoquinolylcar Bonyl)Prop-2-Enenitrile	Unknown	NA	0
NA	NA	(2E)-3-(2H-Benzo[3,4-D1,3-Dioxolen-5-Yl)-2-(Acetylamino)-N-Benzylprop-2-Enami De	Unknown	NA	0
HMDB0011503	NA	(2-Aminoethoxy)[(2R)-3-(Hexadecanoyloxy)-2-HydroxypropoxyPhosphinic Acid	Microbiota; Food related	Microbiota(BIGG:1agpe160); Food related(FooDB:FDB028219 HMDB:HMDB0011503)	0
HMDB0011506	NA	(2-Aminoethoxy)[(2R)-2-Hydroxy-3-[(9Z)-Octadec-9-EnoyloxyPropoxyPhosphinic Acid	Food related	Food related(FooDB:FDB028222 HMDB:HMDB0011506)	0
HMDB0010407	C04230	(2-{[(2R)-3-[(1Z)-Hexadec-1-En-1-Yloxy-2-Hydroxypropyl PhosphonatoOxy}Ethyl)Trimethylazanium	Host; Microbiota; Food related	Microbiota(KEGG:C04230); Food related(FooDB:FDB027558 HMDB:HMDB0010407)	0
HMDB0013122	C04230	(2-{[(2R)-2-Hydroxy-3-[(1Z)-Octadec-1-En-1-YloxyPropyl PhosphonatoOxy}Ethyl)Trimethylazanium	Host; Microbiota; Food related	Microbiota(KEGG:C04230); Food related(FooDB:FDB029295 HMDB:HMDB0013122)	0
HMDB0010379	C04230	(2-{[(2R)-2-Hydroxy-3-(Tetradecanoyloxy)Propyl PhosphonatoOxy}Ethyl)Trimethylazanium	Host; Microbiota; Food related	Microbiota(KEGG:C04230); Food related(FooDB:FDB027530 HMDB:HMDB0010379)	0
NA	NA	(1S,4S,8R,14S)-11-Ethyl-12-Oxo-7,9,13-Trioxatetracyclo[6.5.1.0(1),(1).0,(1)Tetradeca-2,5-Diene-5-Carboxylic Acid	Unknown	NA	0
NA	NA	(1R,4S,7S,8S,9R,12E,20R,21R,22S,23S)-7,8,21,22,23-Pentahydroxy-12,16-Dimethyl-3,5,10,19,24-Pentaoxatricyclo[18.3.1.04,9Tetracos-12-En-11-One	Unknown	NA	1
HMDB0242328	NA	(1R,3R)-1-Aminocyclopentane-1,3-Dicarboxylic Acid	Unknown	NA	0
NA	NA	(1R,3As,3Br,6Ar,7As,9R,11R,11As,12Ar,13Ar,15Ar)-3A,11,11A-Trihydroxy-9,15A-Dimethyl-1-(5-Oxo-2,5-Dihydro-3-Furanyl)Icosahydro-7Ah,13Ah-Cyclopenta[7,8Phenanthro[2,3-BPyrano[3,2-E[1,4Dioxine-13A-Carbaldehyde	Unknown	NA	0
NA	NA	(1As,2Z,4E,14R,15As)-8-Chloro-9,11-Dihydroxy-14-Methyl-1A,14,15,15A-Tetrahydro-6H-Oxireno[E[2Benzoxacyclotetradecine-6,12(7H)-Dione	Unknown	NA	0
NA	NA	(11S)-14-Ethyl-12-Ethylidene-8,14-Diazapentacyclo[9.5.2.0<1,9.0<2,7.0<14,17 Octadeca-2,4,6,9-Tetraene-10-Carbaldehyde, Iodide	Unknown	NA	0
NA	NA	(10R,13S)-17-((Z)-5,5-Diphenylpenta-2,4-Dien-2-Yl)-10,13-Dimethyl-2,3,4,7,8,9,10,11,12,13,14,15,16,17-Tetradecahydro-1H-Cyclopenta[APhenanthren-3-Ol	Unknown	NA	0
HMDB0037605	NA	(10Betah,11Xi)-11-Hydroxy-13-Nor-6-Eremophilen-8-One	Food related	Food related(FooDB:FDB016718 HMDB:HMDB0037605)	0
NA	NA	(+)-Aspermytin A	Unknown	NA	0
NA	NA	(+)-Aerugine	Unknown	NA	0
NA	NA	(+)-12-Hydroxyamorphigenin	Unknown	NA	1
