# Supplementary material for: Non-tuberculous mycobacteria enhance the tryptophan-kynurenine pathway to induce immunosuppression and facilitate pulmonary colonization
Source: Front Cell Infect Microbiol. 2024 Oct 21;14:1455605. doi: 10.3389/fcimb.2024.1455605 (PMC11532197; doi:10.3389/fcimb.2024.1455605)
Supplement: Supplementary file 6 [file Table6.xlsx]

## Sheet: NTM Vs Control
Supplementary Table7 | Lung Metabolite Changes in NTM/TB and Control Groups
HMDBID	KEGGID	Name	FC	Pvalue	FDR
HMDB0000235	C00378	Thiamine	Inf	0.00389049	0.0382791
NA	NA	N-[3,5-Bis(Trifluoromethyl)Phenyl-2-(2-1,2,3,4-Tetrahydroisoquinolyl)Acetamid E	Inf	0.00389049	0.0382791
HMDB0034367	NA	Gamma-Glutamylmethionine	Inf	0.00389049	0.0382791
NA	NA	Fumonisin Py2	Inf	0.00389049	0.0382791
NA	NA	8-[2-(3,4-Dihydroxy-2,5-Dimethoxyoxolan-3-Yl)Ethyl-4A,7,8-Trimethylspiro[2,3,5,6,7,8A-Hexahydro-1H-Naphthalene-4,2-Oxirane-2,3-Diol	Inf	0.00389049	0.0382791
HMDB0040930	NA	1,5-Bis(4-Hydroxy-3-Methoxyphenyl)-1,4-Pentadien-3-One	Inf	0.00389049	0.0382791
HMDB0259814	C01626	Vindoline	26.8581	0.004329	0.0382791
HMDB0029134	NA	Val-Phe	22.7397	0.004329	0.0382791
HMDB0029130	NA	Val-Ile	13.554	0.004329	0.0382791
NA	C09249	Usambarensine	4.21866	0.004329	0.0382791
HMDB0000288	C00105	UMP	5.35236	0.004329	0.0382791
HMDB0029113	NA	Tyr-Pro	10.8254	0.004329	0.0382791
HMDB0029109	NA	Tyrosylleucine	22.9847	0.004329	0.0382791
HMDB0029108	NA	Tyrosylisoleucine	8.23772	0.004329	0.0382791
HMDB0000929	C00078	Tryptophan	15.0735	0.004329	0.0382791
HMDB0000262	C00178	Thymine	4.21129	0.004329	0.0382791
HMDB0000273	C00214	Thymidine	8.68248	0.004329	0.0382791
HMDB0029069	NA	Thr-Pro	13.1425	0.004329	0.0382791
NA	NA	Teucroxide	3.08268	0.004329	0.0382791
HMDB0258305	C09643	Sinomenine	21.7874	0.004329	0.0382791
HMDB0029046	NA	Ser-Phe	11.795	0.004329	0.0382791
HMDB0029043	NA	Ser-Leu	15.0509	0.004329	0.0382791
HMDB0033705	NA	Salviaflaside	10.6942	0.004329	0.0382791
NA	NA	Pyroglu-Tyr	9.62757	0.004329	0.0382791
HMDB0039229	NA	Pyroglutaminylglutamine	7.78039	0.004329	0.0382791
HMDB0029135	NA	Prolylvaline	12.3392	0.004329	0.0382791
HMDB0029011	NA	Prolylarginine	80.0735	0.004329	0.0382791
HMDB0003411	C00763	Proline	2.52851	0.004329	0.0382791
HMDB0257686	NA	Polyinosinic Acid	4.36648	0.004329	0.0382791
HMDB0029005	NA	Phe-Thr	10.8237	0.004329	0.0382791
HMDB0253025	NA	Phenylalanylleucine	50.5956	0.004329	0.0382791
HMDB0304788	NA	Phenylalanyl-Glycine	4.72936	0.004329	0.0382791
HMDB0028994	NA	Phenylalanylglutamate	4.15964	0.004329	0.0382791
HMDB0029009	NA	Phenylalanyl-Gamma-Glutamate	8.39506	0.004329	0.0382791
HMDB0304787	NA	Phenylalanylalanine	26.7816	0.004329	0.0382791
HMDB0028993	NA	Phe-Gln	10.5267	0.004329	0.0382791
NA	NA	Peucenin	9.09226	0.004329	0.0382791
NA	NA	Peloruside B	12.1496	0.004329	0.0382791
NA	NA	PC(17:1/18:2)	0.35187	0.004329	0.0382791
HMDB0004825	C04227	Octopamine	3.62027	0.004329	0.0382791
NA	NA	N-Ethyl-N-(4-Ethylphenyl)-2-[(4-Hydroxyquinazolin-2-Yl)ThioAcetamide	16.3113	0.004329	0.0382791
HMDB0002064	C02714	N-Acetylputrescine	3.27381	0.004329	0.0382791
HMDB0041947	NA	N1,N8-Diacetylspermidine	4.29191	0.004329	0.0382791
NA	NA	N-{4-[N-BenzylcarbamoylPhenyl}(3,4,5-Trimethoxyphenyl)Carboxamide	6.14022	0.004329	0.0382791
HMDB0240365	NA	N,N,N-Trimethyl-L-Alanyl-L-Proline Betaine	14.8166	0.004329	0.0382791
NA	NA	N-(3-Hydroxypropyl)-N-(3-Hydroxypropyl)Ethane-1,2-Diamide	18.6505	0.004329	0.0382791
NA	NA	N-(3-Cyanophenyl)-2-(4-Hydroxyquinazolin-2-Ylthio)Acetamide	0.0901546	0.004329	0.0382791
HMDB0254871	NA	Monopropionylcadaverine	8.56225	0.004329	0.0382791
HMDB0000227	C00418	Mevalonic Acid	0.0350561	0.004329	0.0382791
NA	NA	Methyl 3-Phenyl-2-(Phenylformamido)Propanoate	9.08752	0.004329	0.0382791
HMDB0242427	NA	Mesaconine	15.1462	0.004329	0.0382791
HMDB0028955	NA	Lys-Leu	14.4606	0.004329	0.0382791
HMDB0028939	NA	Leu-Thr	16.5193	0.004329	0.0382791
HMDB0028928	NA	Leu-Glu	25.9493	0.004329	0.0382791
HMDB0028934	NA	Leucyl-Lysine	46.2018	0.004329	0.0382791
HMDB0028932	NA	Leucyl-Isoleucine	11.9502	0.004329	0.0382791
HMDB0028927	NA	Leucyl-Glutamine	10.3718	0.004329	0.0382791
HMDB0005768	C02993	Kyotorphin	27.303	0.004329	0.0382791
HMDB0000684	C00328	Kynurenine	3.58702	0.004329	0.0382791
NA	NA	Koninginin E	16.2193	0.004329	0.0382791
HMDB0028916	NA	Isoleucylserine	18.8928	0.004329	0.0382791
HMDB0011174	NA	Isoleucylproline	9.0281	0.004329	0.0382791
HMDB0028914	NA	Isoleucyl-Phenylalanine	10.9873	0.004329	0.0382791
HMDB0028903	NA	Isoleucylaspartate	11.0728	0.004329	0.0382791
HMDB0028901	NA	Isoleucylarginine	19.5788	0.004329	0.0382791
HMDB0001190	C00637	Indole-3-Acetaldehyde	4.68027	0.004329	0.0382791
HMDB0000738	C00463	Indole	2.076	0.004329	0.0382791
HMDB0002271	C20522	Imidazolepropionic Acid	3.98114	0.004329	0.0382791
NA	NA	Imazapic	11.9911	0.004329	0.0382791
HMDB0253404	C18598	Imazamox	4.17679	0.004329	0.0382791
HMDB0028898	NA	Histidylvaline	8.30149	0.004329	0.0382791
HMDB0028897	NA	Histidyltyrosine	9.76305	0.004329	0.0382791
HMDB0028893	NA	Histidylproline	23.9359	0.004329	0.0382791
HMDB0028888	NA	Histidylisoleucine	4.19604	0.004329	0.0382791
HMDB0062295	NA	Hepes	5.3301	0.004329	0.0382791
HMDB0029488	NA	Gummosin	18.5398	0.004329	0.0382791
HMDB0028853	NA	Gly-Tyr	8.18621	0.004329	0.0382791
HMDB0000721	NA	Glycylproline	8.98798	0.004329	0.0382791
HMDB0028848	NA	Glycyl-L-Phenylalanine	11.3072	0.004329	0.0382791
HMDB0000759	C02155	Glycylleucine	9.06938	0.004329	0.0382791
HMDB0000131	C00116	Glycerol	0.0105179	0.004329	0.0382791
HMDB0029156	NA	Glutamylphenylalanine	21.5522	0.004329	0.0382791
HMDB0011170	NA	Gamma-Glutamylisoleucine	7.42179	0.004329	0.0382791
HMDB0004089	C05653	Formylanthranilic Acid	1.65296	0.004329	0.0382791
HMDB0252399	C10967	Fluperlapine	17.0378	0.004329	0.0382791
HMDB0038017	NA	Ethyl 2-Phenyl-3-Furancarboxylate	5.05813	0.004329	0.0382791
NA	NA	Epiequisetin	14.1233	0.004329	0.0382791
HMDB0001227	C00364	dTMP	32.6864	0.004329	0.0382791
HMDB0003581	C01909	Desthiobiotin	42.3491	0.004329	0.0382791
NA	NA	Descladinose Azithromycin	19.9985	0.004329	0.0382791
HMDB0006555	C06196	Deoxyinosine Monophosphate	34.7661	0.004329	0.0382791
NA	C09943	Dendrobine	16.5262	0.004329	0.0382791
HMDB0001202	C00239	dCMP	6.41784	0.004329	0.0382791
NA	NA	Crocacin C	14.6101	0.004329	0.0382791
NA	NA	Butyl 4-[(3,4-Dimethoxyphenyl)CarbonylaminoBenzoate	10.365	0.004329	0.0382791
HMDB0014382	C07827	Butabarbital	18.6733	0.004329	0.0382791
NA	NA	Bovoside A	19.9264	0.004329	0.0382791
NA	C18415	Benthiavalicarb Isopropyl	7.20826	0.004329	0.0382791
HMDB0302856	C08268	Baikiain	3.07337	0.004329	0.0382791
HMDB0014352	C06838	Azithromycin	8.62919	0.004329	0.0382791
HMDB0028716	NA	Arginylphenylalanine	15.2418	0.004329	0.0382791
HMDB0000517	C00062	Arginine	0.478819	0.004329	0.0382791
HMDB0028694	NA	Alanylphenylalanine	32.3697	0.004329	0.0382791
NA	NA	Alanylnorvaline	14.9803	0.004329	0.0382791
HMDB0028690	NA	Ala-Ile	8.9595	0.004329	0.0382791
NA	NA	7-Benzyloxytryptamine	7.35374	0.004329	0.0382791
HMDB0252077	NA	6-Oxo-Butanal	3.02631	0.004329	0.0382791
NA	NA	6-Ethoxy-4-Hydroxy-3-Benzylhydroquinolin-2-One	9.01521	0.004329	0.0382791
NA	NA	6-Chloro-3-[4-(2-Hydroxyethyl)Piperazinyl-4-Phenylhydroquinolin-2-One	4.42167	0.004329	0.0382791
HMDB0257214	NA	6-(Gamma,Gamma-Dimethylallylamino)Purine Riboside	2.87114	0.004329	0.0382791
NA	NA	5,7-Dimethyl-4-(2-1,2,3,4-Tetrahydroisoquinolylmethyl)Chromen-2-One	24.8945	0.004329	0.0382791
HMDB0304210	C00906	5,6-Dihydrothymine	2.17553	0.004329	0.0382791
HMDB0031256	NA	4-Hydroxy-2H-Pyran-3-Carboxaldehyde	9.55733	0.004329	0.0382791
HMDB0245972	NA	3-Phenylacetylamino-2,6-Piperidinedione	45.4814	0.004329	0.0382791
NA	NA	3-Methyl-7-[(3-Methylphenyl)Methyl-8-Nonylthio-1,3,7-Trihydropurine-2,6-Dione	16.1699	0.004329	0.0382791
NA	NA	3-Hydroxy-6,6-Dimethyl-2-(3,4,5-Trimethoxyphenyl)-3,5,6,7-Tetrahydrobenzimidaz Ol-4-One	10.3303	0.004329	0.0382791
HMDB0246093	NA	3-Deoxyinosine	5.32807	0.004329	0.0382791
NA	NA	3-[(2S,3R,4S,5R,6R)-4-[(2S,3R,4S,5S,6R)-4,5-Dihydroxy-6-(Hydroxymethyl)-3-[(2S,3R,4S,5R)-3,4,5-Trihydroxyoxan-2-YlOxyoxan-2-YlOxy-3,5-Dihydroxy-6-(Hydroxymethyl)Oxan-2-YlOxy-2-(3,4-Dihydroxyphenyl)-5,7-Dihydroxychromen-4-One	0.319467	0.004329	0.0382791
NA	NA	3-(5,7-Dimethoxy-4-Oxochromen-2-Yl)Propanoic Acid	6.47339	0.004329	0.0382791
NA	NA	3-(2-Hydroxyethyl)-1H,3H-Quinazoline-2,4-Dione	11.9366	0.004329	0.0382791
HMDB0303058	NA	2-Phenylethyl 6-O-(6-Deoxy-Alpha-L-Mannopyranosyl)-Beta-D-Glucopyranoside	8.2281	0.004329	0.0382791
NA	NA	2-Oxo-1H-Quinoline-4-Carboxylic Acid	31.2688	0.004329	0.0382791
HMDB0000402	C02504	2-Isopropylmalic Acid, (S)-(+)-	2.75558	0.004329	0.0382791
HMDB0038055	NA	2-Hydroxy-7-Methoxy-2H-1,4-Benzoxazin-3(4H)-One	6.11864	0.004329	0.0382791
NA	NA	2-Hydroxy-2-[2-Oxo-2-[(4,7,7-Trimethyl-3-Bicyclo[2.2.1Heptanyl)OxyEthylButanedioic Acid	8.1804	0.004329	0.0382791
HMDB0244873	NA	2H-Benzotriazole	0.028729	0.004329	0.0382791
HMDB0245534	NA	2-Deoxyadenosine 3-Monophosphate	9.35167	0.004329	0.0382791
NA	NA	26-Deoxycimicifugoside	0.0327609	0.004329	0.0382791
NA	NA	2-[(2E,5E,7E,11E)-10-Hydroxy-3,7,9,11-Tetramethyl-2,5,7,11-Tridecatetraen-1-Yl-5,6-Dimethoxy-3-Methyl-4-Pyridinyl 6-Deoxy-Alpha-L-Mannopyranoside	30.0579	0.004329	0.0382791
NA	NA	2,4-Dihydroxy-4-[(1E)-3-Hydroxy-1-Buten-1-Yl-3,5,5-Trimethylcyclohexyl Beta-D-Glucopyranoside	10.4637	0.004329	0.0382791
HMDB0246655	NA	2,3,3-Trimethylbenzoindolenine	11.5788	0.004329	0.0382791
HMDB0028917	NA	2-(2-Amino-3-Methylpentanamido)-3-Hydroxybutanoic Acid	24.2836	0.004329	0.0382791
HMDB0028902	NA	2-(2-Amino-3-Methylpentanamido)-3-Carbamoylpropanoic Acid	18.2837	0.004329	0.0382791
HMDB0028738	NA	2-(2-Amino-3-Carbamoylpropanamido)-3-Phenylpropanoic Acid	16.4243	0.004329	0.0382791
NA	NA	2-((4-Ethyl-8,8-Dimethyl-2-Oxo-2,8,9,10-Tetrahydropyrano[2,3-FChromen-5-Yl)Oxy)-N-Isopropylacetamide	59.6154	0.004329	0.0382791
HMDB0034587	NA	1-Pyrrolidinecarboxaldehyde	2.87897	0.004329	0.0382791
NA	NA	10,11-Dimethoxy-4A,5,5A,7,8,13A,15,15A,15B,16-Decahydro-2H-4,6-Methanoindolo[3,2,1-IjOxepino[2,3,4-DePyrrolo[2,3-HQuinoline-14-One	20.5779	0.004329	0.0382791
HMDB0244082	NA	1,2-Dimethylimidazole	10.0503	0.004329	0.0382791
NA	NA	{4-[(4-Hydroxy-6-Propylpyrimidin-2-Ylthio)MethylPhenyl}-N-(3-Methylphenyl)Car Boxamide	5.64138	0.004329	0.0382791
NA	NA	[4-[(3,5-Dimethylphenyl)CarbamoylaminoPhenyl Sulfamate	5.16218	0.004329	0.0382791
NA	NA	[3-Hydroxy-1-[3-Hydroxy-1-Oxo-1-(2,3,4,5,6-Pentahydroxyhexoxy)Decan-5-YlOxy-1-Oxodecan-5-Yl 3,5-Dihydroxydecanoate	15.2677	0.004329	0.0382791
NA	NA	[2-[(Z)-Heptadec-9-EnoylOxy-3-Hexadecanoyloxypropyl 2-(Trimethylazaniumyl)Ethyl Phosphate	0.260389	0.004329	0.0382791
NA	NA	(Z)-3-(4-Hydroxyphenyl)-N-[4-[[(E)-3-(4-Hydroxyphenyl)Prop-2-EnoylAminoButylProp-2-Enamide	8.4238	0.004329	0.0382791
NA	NA	(R)-N-Acetyl-4-Naphthylalanine	9.30411	0.004329	0.0382791
NA	NA	(3,4-Dimethoxyphenyl)-N-[(4-Phenylpiperazinyl)MethylCarboxamide	25.4813	0.004329	0.0382791
NA	NA	(2R,3R,4S,5S,6R)-2-Octoxy-6-[[(2S,3R,4S,5R)-3,4,5-Trihydroxyoxan-2-YlOxymethylOxane-3,4,5-Triol	20.6012	0.004329	0.0382791
HMDB0002927	C09789	Naringin	0	0.00549411	0.0421792
NA	NA	N-[(1E)-2-(3,4,5-Trimethoxyphenyl)-1-Azavinyl-N-(3,4-Dimethylphenyl)Butane-1 ,4-Diamide	Inf	0.00549411	0.0421792
NA	NA	N-(4-Methylphenyl)-2-(1-Methyl-3-Phenylthioindol-2-Yl)Acetamide	Inf	0.00549411	0.0421792
NA	NA	Methyl 19-Hydroxy-14,18-Dimethyl-12-Azahexacyclo[10.6.1.1,.0,.0,.0,Icosa-3,7(20)-Diene-3-Carboxylate	Inf	0.00549411	0.0421792
HMDB0304413	C09581	Magnoflorine	Inf	0.00549411	0.0421792
HMDB0014623	D04687	Lenalidomide	Inf	0.00549411	0.0421792
NA	NA	Hwesasxx	Inf	0.00549411	0.0421792
NA	C10034	Cupressuflavone	Inf	0.00549411	0.0421792
NA	NA	Beta-D-Glucopyranose, 6-O-Beta-D-Glucopyranosyl-1-O-[(2,6,6-Trimethyl-1-Cyclohexen-1-Yl)Carbonyl-	Inf	0.00549411	0.0421792
NA	NA	3,5-Dihydroxy-4-[3,4,5-Trihydroxy-6-[[4-(2-Hydroxypropan-2-Yl)Cyclohexene-1-CarbonylOxymethylOxan-2-YlOxybenzoic Acid	Inf	0.00549411	0.0421792
NA	NA	2-Phenylethyl 4-(3-Ethoxy-4-Hydroxyphenyl)-7-(4-Methoxyphenyl)-2-Methyl-5-Oxo- 1,4,6,7,8-Pentahydroquinoline-3-Carboxylate	Inf	0.00549411	0.0421792
HMDB0000286	C00029	UDP-Glucose	Inf	0.00673595	0.0421792
HMDB0029072	NA	Threonyltryptophan	Inf	0.00673595	0.0421792
NA	NA	Spiculisporic Acid	Inf	0.00673595	0.0421792
HMDB0028997	NA	Phenylalanylhistidine	Inf	0.00673595	0.0421792
HMDB0256221	C11019	Pendimethalin	Inf	0.00673595	0.0421792
NA	NA	N-[4-(Methylethyl)Phenyl-2-(9-Methyl-6-Oxohydropurin-8-Ylthio)Butanamide	Inf	0.00673595	0.0421792
NA	NA	Methyl 4,10-Diacetyloxy-5,9-Dihydroxy-1,4A-Dimethyl-7-Propan-2-Yl-2,3,4,9,10,10A-Hexahydrophenanthrene-1-Carboxylate	Inf	0.00673595	0.0421792
NA	NA	L-3-Hydroxy-N-Methylmorphinan Bitartrate	Inf	0.00673595	0.0421792
NA	NA	Hexyl 2-[(4-Hydroxy-2-Oxo-3-Hydroquinolyl)CarbonylaminoBenzoate	Inf	0.00673595	0.0421792
NA	NA	Corynoxine	Inf	0.00673595	0.0421792
NA	NA	3-(2-Hydroxy-3-Methoxyphenyl)-1,5-Dimethyl-4,6-Dioxo-1,2,3,5,3A,6A-Hexahydro-2 ,5-Diazapentalenecarboxylic Acid	Inf	0.00673595	0.0421792
HMDB0000905	C00360	2-Deoxy-5-Adenosine Monophosphate	Inf	0.00673595	0.0421792
HMDB0245544	NA	2,3-Dideoxyadenosine	Inf	0.00673595	0.0421792
NA	NA	[(2R,3S,4S,5R,6R)-6-[1,7-Bis(4-Hydroxyphenyl)-5-Oxoheptan-3-YlOxy-3,4,5-Trihydroxyoxan-2-YlMethyl (E)-3-(4-Hydroxyphenyl)Prop-2-Enoate	Inf	0.00673595	0.0421792
NA	NA	[(1R,2S,4R,5S,6S,11R,12R,14S,16R)-5,6,11-Trihydroxy-4-(Hydroxymethyl)-8,12,15,15-Tetramethyl-7-Oxo-3-Oxapentacyclo[9.5.0.02,4.06,10.014,16Hexadec-8-En-14-Yl Dodecanoate	Inf	0.00673595	0.0421792
NA	NA	(S)-Methyl 2-(3-(6,7-Dimethoxy-4-Oxoquinazolin-3(4H)-Yl)Propanamido)-3-Methylbutanoate	Inf	0.00673595	0.0421792
NA	NA	(3,4-Dimethoxyphenyl)-N-[4-(Cyanomethyl)PhenylCarboxamide	Inf	0.00673595	0.0421792
NA	NA	N-Fructosyl Isoleucine	261.593	0.00754623	0.0421792
HMDB0028931	NA	Leu-His	34.9419	0.00754623	0.0421792
NA	NA	Cypridinid Etioluciferin	5.86846	0.00754623	0.0421792
HMDB0000619	C00695	Cholic Acid	42.3218	0.00754623	0.0421792
NA	NA	2-O-Methyl-5-Methyluridine	22.1783	0.00754623	0.0421792
NA	NA	2-[3-Oxo-2-[5-[3,4,5-Trihydroxy-6-(Hydroxymethyl)Oxan-2-YlOxypent-2-EnylCyclopentylAcetic Acid	17.2168	0.00754623	0.0421792
NA	NA	(2E,4E)-N-[2-(4-Hydroxyphenyl)EthylDodeca-2,4-Dienamide	231.764	0.00754623	0.0421792
NA	NA	Veratroylzygadenine	17.9816	0.00796941	0.0421792
HMDB0000946	C07880	Ursodiol	123.66	0.00796941	0.0421792
HMDB0000290	C00043	UDP-Glcnac	28.8595	0.00796941	0.0421792
HMDB0245678	NA	P-Nitrophenyl-Alpha-Galactopyranoside	24.6355	0.00796941	0.0421792
HMDB0029007	NA	Phe-Tyr	58.7442	0.00796941	0.0421792
HMDB0014545	C07699	Nisoldipine	11.3742	0.00796941	0.0421792
HMDB0028940	NA	Leu-Trp	31.4839	0.00796941	0.0421792
HMDB0028924	NA	Leucyl-Asparagine	10.1093	0.00796941	0.0421792
NA	C02886	Hexylglutathione	16.8205	0.00796941	0.0421792
NA	C18785	Dinitramine	6.42062	0.00796941	0.0421792
HMDB0060441	C05340	Beta-Alanyl-L-Arginine	23.0157	0.00796941	0.0421792
HMDB0029140	NA	Valylvaline	29.0154	0.00865801	0.0421792
HMDB0304792	NA	Valylarginine	10.9361	0.00865801	0.0421792
HMDB0029118	NA	Tyr-Val	26.2639	0.00865801	0.0421792
HMDB0029098	NA	Tyr-Ala	64.9815	0.00865801	0.0421792
HMDB0029068	NA	Threonylphenylalanine	11.6506	0.00865801	0.0421792
NA	C18652	Thiofanox	4.80558	0.00865801	0.0421792
NA	C01410	Tert-Butoxycarbonylasparagine	8.87163	0.00865801	0.0421792
HMDB0010169	C00550	SM(d18:1/16:0)	8.36919	0.00865801	0.0421792
HMDB0029052	NA	Ser-Val	30.9901	0.00865801	0.0421792
NA	NA	Pyroglu-Val	37.2429	0.00865801	0.0421792
NA	NA	Pyroglutamylisoleucine	10.5261	0.00865801	0.0421792
NA	NA	Pyroglu-Ile-Arg	25.7523	0.00865801	0.0421792
HMDB0011180	NA	Prolylproline	8.70316	0.00865801	0.0421792
HMDB0000245	C00931	Porphobilinogen	4.17209	0.00865801	0.0421792
HMDB0000224	C00346	Phosphorylethanolamine	10.1146	0.00865801	0.0421792
HMDB0255025	C05324	Nicotianamine	12.0872	0.00865801	0.0421792
NA	NA	Nafadotride	8.22261	0.00865801	0.0421792
NA	NA	N6-Benzyl-9H-Purine-2,6-Diamine	42.027	0.00865801	0.0421792
NA	NA	N-(3-Methylthiophenyl)-2-[2-Oxo-4-(Pyrrolidinylcarbonyl)HydroquinolylAcetamid E	14.5349	0.00865801	0.0421792
HMDB0002284	NA	Monoacetylcadaverine	4.35729	0.00865801	0.0421792
HMDB0033112	NA	Methylpyrazine	3.85613	0.00865801	0.0421792
HMDB0031864	C10454	Methyleugenol	14.2039	0.00865801	0.0421792
HMDB0028977	NA	Methionyl-Leucine	22.0659	0.00865801	0.0421792
HMDB0014798	C07934	Metaxalone	13.8565	0.00865801	0.0421792
HMDB0028964	NA	Lysylvaline	9.25668	0.00865801	0.0421792
NA	NA	L-Pyroglutamyl-L-Phenylalanine	16.7961	0.00865801	0.0421792
HMDB0033675	C04020	L-Lysopine	28.2508	0.00865801	0.0421792
HMDB0028942	NA	Leu-Val	23.8401	0.00865801	0.0421792
HMDB0028941	NA	Leucyl-Tyrosine	19.2181	0.00865801	0.0421792
HMDB0028928	NA	Leucyl-Glutamate	7.61615	0.00865801	0.0421792
HMDB0028922	NA	Leucyl-Alanine	11.4772	0.00865801	0.0421792
HMDB0000687	C16439	Leucine	3.20136	0.00865801	0.0421792
HMDB0028901	NA	Isoleucyl-Arginine	11.0031	0.00865801	0.0421792
HMDB0252931	C08901	Gracillin	11.7924	0.00865801	0.0421792
HMDB0028854	NA	Glycylvaline	16.9973	0.00865801	0.0421792
HMDB0028847	NA	Glycylmethionine	4.66721	0.00865801	0.0421792
HMDB0003337	C00127	Glutathione (Oxidized)	0.0992222	0.00865801	0.0421792
HMDB0028832	NA	Glutamylvaline	29.8412	0.00865801	0.0421792
HMDB0028831	NA	Glutamyltyrosine	9.23395	0.00865801	0.0421792
HMDB0003423	C00303	Glutamine	5.53657	0.00865801	0.0421792
HMDB0011741	NA	Gamma-Glutamyltyrosine	8.07394	0.00865801	0.0421792
HMDB0015118	C07805	Formoterol	9.31409	0.00865801	0.0421792
HMDB0014344	C01912	Erythromycin	0.0604429	0.00865801	0.0421792
HMDB0003312	C10208	Daidzein	6.52231	0.00865801	0.0421792
HMDB0250671	NA	Cyclopentylamine	3.99543	0.00865801	0.0421792
HMDB0250581	C08797	Cucurbitacin E	1.88089	0.00865801	0.0421792
HMDB0249565	NA	Calycin	0.125721	0.00865801	0.0421792
NA	C10649	Bucharaine	15.3872	0.00865801	0.0421792
NA	NA	Auranticin A	17.4753	0.00865801	0.0421792
HMDB0002335	NA	Aspartyl-Proline	27.1325	0.00865801	0.0421792
HMDB0001123	C00108	Anthranilic Acid	4.22696	0.00865801	0.0421792
HMDB0028700	NA	Alanylvaline	20.5886	0.00865801	0.0421792
NA	C06691	Actinorhodin	0.0192868	0.00865801	0.0421792
HMDB0060412	C16614	6-Methylthiopurine	1.87038	0.00865801	0.0421792
HMDB0240264	C01297	6-Hydroxypseudooxynicotine	18.2742	0.00865801	0.0421792
HMDB0000472	C01017	5-Hydroxytryptophan	16.1245	0.00865801	0.0421792
NA	NA	5-[(E)-3-Hydroxybut-1-Enyl-4-[4-[(E)-3-Oxobut-1-EnylAnilinoOxolan-2-One	19.2991	0.00865801	0.0421792
HMDB0246635	NA	4-Hydroxymethohexital	13.0347	0.00865801	0.0421792
NA	NA	3-[(2S,3R,4S,5S,6R)-4,5-Dihydroxy-3-[(2S,3R,4R,5R,6S)-3,4,5-Trihydroxy-6-Methyloxan-2-YlOxy-6-[[(2S,3R,4R,5R,6S)-3,4,5-Trihydroxy-6-Methyloxan-2-YlOxymethylOxan-2-YlOxy-5-Hydroxy-2-(4-Hydroxyphenyl)-6-Methoxy-7-[(2S,3R,4R,5R,6S)-3,4,5-Trihydroxy-6-Methyloxan-2-YlOxychromen-4-One	0.0411655	0.00865801	0.0421792
NA	NA	2-O-Methyl-5-Methylcytidine	9.25035	0.00865801	0.0421792
HMDB0000402	C02504	2-Isopropylmalic Acid	2.88044	0.00865801	0.0421792
HMDB0245528	NA	2-Desoxyuridine	11.4546	0.00865801	0.0421792
HMDB0029083	NA	2-[2-Amino-3-(1H-Indol-3-Yl)PropanamidoAcetic Acid	8.49465	0.00865801	0.0421792
NA	NA	2-[2-[(Z)-Pent-2-Enyl-3-[3,4,5-Trihydroxy-6-(Hydroxymethyl)Oxan-2-YlOxycyclopentylAcetic Acid	5.92169	0.00865801	0.0421792
NA	NA	2-(4-Amino-4-Carboxybutanamido)-4-Methylpentanoic Acid	13.9306	0.00865801	0.0421792
HMDB0251509	NA	2-(2-Aminopropanamido)-4-Methylpentanoic Acid	22.2562	0.00865801	0.0421792
HMDB0028844	NA	2-(2-Aminoacetamido)-3-Methylpentanoic Acid	17.9284	0.00865801	0.0421792
NA	NA	2-(2-Amino-3-Phenylpropanamido)-3-Methylbutanoic Acid	16.906	0.00865801	0.0421792
NA	NA	1,7-Dideacetoxy-1,7-Dioxo-3-Deacetylkhivorin	7.40654	0.00865801	0.0421792
NA	NA	[3,4-Dihydroxy-6-[5-Hydroxy-2-(4-Hydroxyphenyl)-4-Oxo-7-[3,4,5-Trihydroxy-6-(Hydroxymethyl)Oxan-2-YlOxychromen-3-YlOxy-5-[(2S,3R,4R,5R,6S)-3,4,5-Trihydroxy-6-Methyloxan-2-YlOxyoxan-2-YlMethyl Acetate	0.117466	0.00865801	0.0421792
NA	NA	(5-Nitro(2-Pyridyl))[(3,4,5-Trimethoxyphenyl)MethylAmine	6.92631	0.00865801	0.0421792
NA	NA	(5E)-10-Heptyl-3,4,5,8,9,10-Hexahydro-5,8,9-Trihydroxy-2H-Oxecin-2-One	61.6493	0.00865801	0.0421792
NA	NA	(2R,3R,11Bs)-2-[(6,7-Dimethoxy-3,4-Dihydroisoquinolin-1-Yl)Methyl-3-Ethyl-9,10-Dimethoxy-2,3,4,6,7,11B-Hexahydro-1H-Pyrido[2,1-AIsoquinoline	10.1471	0.00865801	0.0421792
HMDB0028989	NA	Phenylalanylarginine	Inf	0.0097364	0.0463826
NA	NA	N-{(1E)-2-[4-(Dimethylamino)Phenyl-1-Azavinyl}-2-[(3,5-Dioxo(2H,4H-1,2,4-Tria Zin-6-Yl))AminoAcetamide	Inf	0.0097364	0.0463826
NA	NA	LPS(19:0)	Inf	0.0097364	0.0463826
NA	NA	Isofraxoside	Inf	0.0097364	0.0463826
HMDB0248668	NA	Asperulosidic Acid	Inf	0.0097364	0.0463826
HMDB0030746	NA	5,7-Dihydroxy-2-(3-Hydroxy-4-Methoxyphenyl)-3,4-Dihydro-2H-1-Benzopyran-4-One	Inf	0.0097364	0.0463826
NA	NA	N-(4-Butylphenyl)(3,4,5-Trimethoxyphenyl)Carboxamide	Inf	0.011644	0.0540734
HMDB0303758	NA	Icariside D1	Inf	0.011644	0.0540734
HMDB0252200	C06996	Fenfluramine	Inf	0.011644	0.0540734
HMDB0003459	C00993	D-Alanyl-D-Alanine	Inf	0.011644	0.0540734
HMDB0030005	NA	Austalide A	Inf	0.011644	0.0540734
NA	NA	7-Hydroxy-1-({2-O-[(2E,6E)-8-Hydroxy-2,6-Dimethyl-2,6-Octadienoyl-Beta-D-Glucopyranosyl}Oxy)-7-Methyl-1,4A,5,6,7,7A-Hexahydrocyclopenta[CPyran-4-Carboxylic Acid	Inf	0.011644	0.0540734
NA	NA	6-(2,4-Dihydroxy-3,5-Dimethylhexyl)-4-Hydroxy-3-Methylpyran-2-One	Inf	0.011644	0.0540734
HMDB0259989	NA	Zardaverine	35.4173	0.0128656	0.0582788
HMDB0029001	NA	Phe-Met	123.445	0.0128656	0.0582788
NA	NA	Dehydroxynocardamine	19.1807	0.0128656	0.0582788
NA	NA	2-[6-Hydroxy-2-(3,4,5-Trimethoxyphenyl)-3-Azabicyclo[4.4.0Dec-3-Yl-N-(4-Meth Oxyphenyl)Acetamide	27.4954	0.0128656	0.0582788
NA	NA	1-(2-(2H,3H-Benzo[3,4-E1,4-Dioxin-6-Yl)-2-Oxoethyl)Benzimidazole-2-Carbonitri Le	0	0.0128656	0.0582788
NA	NA	[4-(2-1,2,3,4-Tetrahydroisoquinolylmethyl)Phenyl-N-(2-{[4-(2-1,2,3,4-Tetrahyd Roisoquinolylmethyl)PhenylCarbonylamino}Ethyl)Carboxamide	46.2498	0.0128656	0.0582788
NA	NA	(3E)-3-Benzylidene-4-Methyl-1H-1,4-Benzodiazepine-2,5-Dione	58.523	0.0128656	0.0582788
HMDB0014571	D08648	Triprolidine	18.2193	0.0134972	0.0588681
HMDB0303943	C01617	Taxifolin	14.5283	0.0134972	0.0588681
HMDB0003572	C01850	Rosmarinic Acid	2.65999	0.0134972	0.0588681
HMDB0013302	NA	Phenylalanylphenylalanine	57.3765	0.0134972	0.0588681
NA	NA	PFSM-ammonio	0.0231648	0.0134972	0.0588681
HMDB0000397	C00196	Dihydroxy-Benzoic Acid	0.00267356	0.0134972	0.0588681
HMDB0028721	NA	Arginyltyrosine	26.04	0.0134972	0.0588681
NA	NA	3-Hydroxy-6-[[(E)-3-Hydroxy-2,4-Dimethylhept-4-EnoylAmino-2,4-Dimethyl-5-Oxohexanoic Acid	21.0638	0.0134972	0.0588681
NA	NA	2-[3-[4-[1,3-Dihydroxy-1-(4-Hydroxy-3-Methoxyphenyl)Propan-2-YlOxy-3-MethoxyphenylPropoxy-6-(Hydroxymethyl)Oxane-3,4,5-Triol	16.113	0.0134972	0.0588681
NA	NA	15,16-Dimethoxytricyclo[12.3.1.12,6Nonadeca-1(17),2,4,6(19),14(18),15-Hexaene-3,9,17-Triol	45.6502	0.0134972	0.0588681
NA	NA	[(2R,3S,4S,5R,6R)-3,4,5-Trihydroxy-6-[(2R,3R,4S,5S,6R)-3,4,5-Trihydroxy-6-(Hydroxymethyl)Oxan-2-YlOxyoxan-2-YlMethyl 7-Methyloctanoate	126.272	0.0134972	0.0588681
NA	NA	Teraspiridole C	Inf	0.0166854	0.0624441
HMDB0015621	D01142	Sulfadimethoxine	Inf	0.0166854	0.0624441
NA	NA	7-Chloro-4,8-Dihydroxy-6-Methoxy-3-Methyl-3,4-Dihydroisochromen-1-One	Inf	0.0166854	0.0624441
NA	NA	[(2R,3S,4S,5R,6S)-6-(3,4-Dihydroxybenzoyl)Oxy-3,4,5-Trihydroxyoxan-2-YlMethyl 3,4-Dihydroxybenzoate	Inf	0.0166854	0.0624441
NA	NA	[(2R,3R,4S,5S,6R)-3-Acetyloxy-2-(Acetyloxymethyl)-5-Hexanoyloxy-6-[(2S,3R)-2,3,4-TrihydroxybutoxyOxan-4-Yl 14-Hydroxytetradecanoate	Inf	0.0166854	0.0624441
NA	NA	Val-Gly-Val	19.1647	0.017316	0.0624441
HMDB0029065	NA	Thr-Leu	23.8071	0.017316	0.0624441
HMDB0244121	NA	Tetrahydropyridine	2.19369	0.017316	0.0624441
HMDB0002580	C03642	Taurolithocholate Sulfate	7.74151	0.017316	0.0624441
HMDB0000254	C00042	Succinic Acid	3.62692	0.017316	0.0624441
NA	NA	Sayaendoside	31.6519	0.017316	0.0624441
HMDB0001431	C00534	Pyridoxamine Dihydrochloride	4.18599	0.017316	0.0624441
HMDB0029015	NA	Pro-Gln	74.1132	0.017316	0.0624441
HMDB0000070	C00408	Pipecolic Acid	3.2931	0.017316	0.0624441
NA	NA	N-Epsilon-Formyl-L-Lysine	2.36835	0.017316	0.0624441
NA	NA	N-[3,5-Dimethyl-4-(2-Morpholin-4-Yl-2-Oxoethoxy)Phenyl(3,4,5-Trimethoxyphenyl )Carboxamide	19.2081	0.017316	0.0624441
NA	NA	N-(((1S,9Ar)-Octahydro-1H-Quinolizin-1-Yl)Methyl)-5-(Pyridin-3-Yl)-1H-Pyrazole-3-Carboxamide	68.0331	0.017316	0.0624441
HMDB0245928	NA	M-Toluamide	3.56826	0.017316	0.0624441
NA	NA	Maloformin B4	64.4477	0.017316	0.0624441
NA	NA	Isoleucyl-Isoleucyl-Lysine	18.6954	0.017316	0.0624441
HMDB0029737	C08493	Indole-3-Carbaldehyde	2.44174	0.017316	0.0624441
HMDB0242615	C10696	Hydroquinidine	32.9278	0.017316	0.0624441
HMDB0000661	C00489	Glutaric Acid	0.0494532	0.017316	0.0624441
HMDB0028801	NA	Glutaminylleucine	16.6162	0.017316	0.0624441
HMDB0038341	NA	Glucosylisomaltol	8.42026	0.017316	0.0624441
HMDB0029521	C10044	Galangin	5.1942	0.017316	0.0624441
HMDB0252461	NA	Forsythoside B	0.208246	0.017316	0.0624441
HMDB0029365	C02717	Feruloyltyramine	7.84742	0.017316	0.0624441
HMDB0036438	NA	Fasciculic Acid B	8.40316	0.017316	0.0624441
NA	NA	Ethyl 2-Amino-6-(Hydroxymethyl)-8-Oxo-4-(3-Pyridyl)-4H-Pyrano[3,2-BPyran-3-Ca Rboxylate	5.09568	0.017316	0.0624441
HMDB0002899	C10788	Ellagic Acid	21.6673	0.017316	0.0624441
HMDB0033840	NA	Dihydro-5-Methyl-2(3H)-Furanone	1.7933	0.017316	0.0624441
NA	NA	Deacetylgedunin	68.6815	0.017316	0.0624441
HMDB0034362	C08858	Convallatoxin	18.4797	0.017316	0.0624441
HMDB0034171	C16074	Benzeneacetonitrile	3.09731	0.017316	0.0624441
HMDB0003573	C01479	Atropine	6.88025	0.017316	0.0624441
HMDB0028757	NA	Aspartylleucine	5.81068	0.017316	0.0624441
NA	NA	Alpha-D-Glucopyranoside, Alpha-D-Glucopyranosyl, 3-(2-Methylbutanoate)	14.6319	0.017316	0.0624441
HMDB0004081	C05643	6-Hydroxymelatonin	37.6695	0.017316	0.0624441
HMDB0003355	C00431	5-Aminovaleric Acid	2.11046	0.017316	0.0624441
HMDB0246561	C01877	4-Oxo-L-Proline	1.90468	0.017316	0.0624441
NA	NA	4-((3S,10R,13R,14S,17R)-3-(((2R,3R,4S,5R,6R)-3,4-Dihydroxy-6-Methyl-5-(((2S,3R,4S,5S,6R)-3,4,5-Trihydroxy-6-(Hydroxymethyl)Tetrahydro-2H-Pyran-2-Yl)Oxy)Tetrahydro-2H-Pyran-2-Yl)Oxy)-14-Hydroxy-10-(Hydroxymethyl)-13-Methylhexadecahydro-1H-Cyclopenta[APhenanthren-17-Yl)Furan-2(5H)-One	0.290759	0.017316	0.0624441
NA	NA	3-Hydroxy-1,5-Diphenyl-1-Pentanone	35.3961	0.017316	0.0624441
HMDB0251665	C01341	3-[[1-[4-(Diaminomethylideneamino)Butylamino-4-Methyl-1-Oxopentan-2-YlCarbamoylOxirane-2-Carboxylic Acid	33.264	0.017316	0.0624441
NA	NA	3-(4-Hydroxyphenyl)Propanoic Acid 3-(4-Hydroxy-3-Methoxyphenyl)Propyl Ester	21.8573	0.017316	0.0624441
NA	NA	2-Methylpyrrolidine	8.09394	0.017316	0.0624441
NA	NA	2H-Pyrido[1,2-A[1,4,7,10Tetraazacyclododecine-1,4,7,10(3H,12H)-Tetrone, 3-(7,8-Dihydroxy-6-Oxooctyl)Octahydro-9-(1-Methylpropyl)-6-(Phenylmethyl)-	16.0058	0.017316	0.0624441
HMDB0245084	NA	2-Cyanoacetamide	0.778287	0.017316	0.0624441
NA	NA	2-{1-[(4-Chlorophenyl)Carbonyl-5-Methoxy-2-Methylindol-3-Yl}-N-(2-Pyridylmeth Yl)Acetamide	0.0938291	0.017316	0.0624441
NA	NA	2-[6-Hydroxy-2-(4-Hydroxy-3-Methoxyphenyl)-3-Azabicyclo[4.4.0Dec-3-Yl-N-(4-M Ethylphenyl)Acetamide	41.3164	0.017316	0.0624441
NA	NA	2-(Acetylamino)-N-Cyclopropyl-3-Indol-3-Ylpropanamide	10.1002	0.017316	0.0624441
NA	NA	2(1H)-Azulenone, 6-(Beta-D-Glucopyranosyloxy)-4,5,6,7,8,8A-Hexahydro-5-Hydroxy-5-(1-Hydroxy-1-Methylethyl)-3,8-Dimethyl-	52.9778	0.017316	0.0624441
NA	NA	2-((2H-Pyrazolo[3,4-DPyrimidin-4-Yl)Amino)Ethanol	2.56813	0.017316	0.0624441
HMDB0244880	NA	1H-Imidazole-4-Carboxamide	3.77486	0.017316	0.0624441
NA	NA	14-(Hydroxyethyl)-2,15-Dimethyltetracyclo[8.7.0.0<2,7.0<11,15Heptadec-7-En- 5-Yl Acetate	25.7127	0.017316	0.0624441
HMDB0244231	C19463	1,5-Naphthalenediamine	3.04646	0.017316	0.0624441
NA	NA	[(3Ar,4R,5R,6Z,9Z,11Ar)-4-Hydroxy-6,10-Dimethyl-3-Methylidene-2,8-Dioxo-4,5,11,11A-Tetrahydro-3Ah-Cyclodeca[BFuran-5-Yl (Z)-2-Methylbut-2-Enoate	0.177811	0.017316	0.0624441
NA	NA	[(2R)-1,1,2,3,3-Pentadeuterio-3-Heptadecanoyloxy-2-[(Z)-Tetradec-9-EnoylOxypropyl 2-(Trimethylazaniumyl)Ethyl Phosphate	0.0789089	0.017316	0.0624441
NA	NA	(6-Bromo-2-Oxochromen-3-Yl)-N-[(2-Iodophenyl)CarbonylaminoCarboxamide	0.529669	0.017316	0.0624441
NA	NA	(3R,4R,6S,6As,8R,9R,10S,11S,11Ar,12R,13R)-11A-Acetoxy-4-(2-Chloroacetoxy)-1-Ethyl-9,11-Dihydroxy-6,10,13-Trimethoxy-3-(Methoxymethyl)Tetradecahydro-1H-3,6A,12-(Epiethane[1,1,2Triyl)-7,9-Methanonaphtho[2,3-BAzocin-8-Yl Benzoate	0.0764766	0.017316	0.0624441
NA	NA	(2-Isobutyrylamino-Acetylamino)-Acetic Acid	45.0205	0.017316	0.0624441
NA	NA	(1R,4S,7S,8S,9R,12E,20R,21R,22S,23S)-7,8,21,22,23-Pentahydroxy-12,16-Dimethyl-3,5,10,19,24-Pentaoxatricyclo[18.3.1.04,9Tetracos-12-En-11-One	11.8692	0.017316	0.0624441
HMDB0253690	C05334	Isosakuranetin	Inf	0.0194973	0.0695333
NA	NA	Ethyl 4-[2-(9-Methyl-6-Oxohydropurin-8-Ylthio)AcetylaminoBenzoate	0	0.0194973	0.0695333
HMDB0245570	C16500	2,3,14-Trihydroxy-10,13-Dimethyl-17-(2,3,6,7-Tetrahydroxy-6-Methylheptan-2-Yl)-2,3,4,5,9,11,12,15,16,17-Decahydro-1H-Cyclopenta[APhenanthren-6-One	Inf	0.0194973	0.0695333
NA	NA	2-(2,4-Difluorophenoxy)-N-{2-[2-Methyl-5-(Phenylmethoxy)Indol-3-YlEthyl}Aceta Mide	Inf	0.0194973	0.0695333
HMDB0001850	C07188	Verapamil	135.695	0.0212669	0.0746077
HMDB0015017	C12599	Racivir	0	0.0212669	0.0746077
NA	NA	N-(Benzimidazol-2-Ylethyl)-2-(4-Hydroxyquinazolin-2-Ylthio)Acetamide	22.5121	0.0212669	0.0746077
NA	NA	4-[(E)-3-[(2R,3R,4S,5S,6R)-3-[(2S,3R,4R)-3,4-Dihydroxy-4-(Hydroxymethyl)Oxolan-2-YlOxy-4,5-Dihydroxy-6-(Hydroxymethyl)Oxan-2-YlOxybut-1-Enyl-3,5,5-Trimethylcyclohex-2-En-1-One	19.589	0.0212669	0.0746077
NA	NA	2-[Bisbenzylamino-1-(4-Hydroxy-3-Methoxyphenyl)Ethan-1-One, Chloride	34.3067	0.0212669	0.0746077
NA	NA	{4,5-Dimethoxy-3-[(3,4,5-Trimethoxyphenyl)CarbonylaminoPhenyl}-N,N-Diethylcar Boxamide	27.0108	0.0212669	0.0746077
NA	NA	Quinovin	6.14894	0.0221735	0.0761331
NA	NA	O-Trimethoxy-3,4,5-Benzoyl-Oh-Vincamajine	7.92412	0.0221735	0.0761331
NA	NA	N-Phenyl[(9,11,13-Trimethyl-8,15-Dioxatetracyclo[10.2.2.0<2,7.0<9,14Hexadec A-2(7),3,5-Trien-12-Yl)MethoxyCarboxamide	14.0824	0.0221735	0.0761331
NA	C10954	Naproanilide	54.546	0.0221735	0.0761331
HMDB0028829	NA	Glu-Thr	12.3041	0.0221735	0.0761331
HMDB0248860	NA	Baohuoside I	0.0141501	0.0221735	0.0761331
HMDB0246885	NA	5-O-Methylthymidine	19.3115	0.0221735	0.0761331
NA	NA	2-[2-Oxo-4-(Piperidylcarbonyl)Hydroquinolyl-N-(2,4,6-Trimethylphenyl)Acetamid E	17.4259	0.0221735	0.0761331
HMDB0015224	C01443	Ouabain	Inf	0.0276595	0.0914047
NA	NA	5-(4-Carboxy-3-Methylbutyl)-5,6,8A-Trimethyl-3-Oxo-4A,6,7,8-Tetrahydro-4H-Naphthalene-1-Carboxylic Acid	Inf	0.0276595	0.0914047
HMDB0243512	D01371	Vinpocetine	14.9545	0.030303	0.0914047
HMDB0029103	NA	Tyrosylglutamine	3.47501	0.030303	0.0914047
HMDB0062590	C01456	Tropic Acid	1.80989	0.030303	0.0914047
HMDB0000907	NA	Sulfolithocholic Acid	14.2975	0.030303	0.0914047
HMDB0029032	NA	Serylalanine	5.40621	0.030303	0.0914047
HMDB0028995	NA	Phenylalanylglycine	3.00206	0.030303	0.0914047
HMDB0000228	C00146	Phenol	1.76928	0.030303	0.0914047
NA	NA	PFSM-ammonio_N_CMAmP_FT_FOSA	7.33193	0.030303	0.0914047
NA	NA	PC(17:0/20:4(4Z,7Z,10Z,13Z))	0.279471	0.030303	0.0914047
NA	NA	N-Cyclopentyl-2-{4-[(6-Ethoxy-2-Oxochromen-4-Yl)MethylPiperazinyl}Acetamide	4.99581	0.030303	0.0914047
NA	NA	N-Cyclohexyl-2-[1-(4-Methoxyphenyl)(1,2,3,4-Tetrahydrobeta-Carbolin-2-Yl)Acet Amide	16.3256	0.030303	0.0914047
HMDB0000766	NA	N-Acetylalanine	1.99154	0.030303	0.0914047
HMDB0000206	C02727	N6-Acetyl-L-Lysine	5.50261	0.030303	0.0914047
HMDB0240345	NA	N2,N5-Diacetylornithine	22.6138	0.030303	0.0914047
NA	NA	N-{4-[(3,5-Dimethoxyphenyl)CarbonylaminoPhenyl}Acetamide	0.15547	0.030303	0.0914047
HMDB0002005	C02989	Methionine Sulfoxide	1.52947	0.030303	0.0914047
HMDB0015418	C12662	Josamycin	6.65457	0.030303	0.0914047
HMDB0028911	NA	Isoleucylleucine	34.3707	0.030303	0.0914047
HMDB0000195	C00294	Inosine	0.178564	0.030303	0.0914047
HMDB0006961	C05235	Hydroxyacetone	0.144266	0.030303	0.0914047
NA	NA	Hex-Naringenin (Put)	0.186551	0.030303	0.0914047
NA	C09103	Grayanotoxin I	12.6262	0.030303	0.0914047
HMDB0028830	NA	Glutamyltryptophan	3.96915	0.030303	0.0914047
HMDB0000014	C00881	Deoxycytidine	31.2266	0.030303	0.0914047
HMDB0000656	C05526	Cysteineglutathione Disulfide	0.247758	0.030303	0.0914047
HMDB0000574	C00097	Cysteine	9.66089	0.030303	0.0914047
HMDB0001570	C00364	Cyclic 3,5-Dtmp	0.0444852	0.030303	0.0914047
HMDB0000212	C01074	Acetylgalactosamine	3.88118	0.030303	0.0914047
HMDB0001250	C07565	Acetanilide	0.22392	0.030303	0.0914047
NA	NA	7-Hydroxy-3-Phenyl-8-(Piperidylmethyl)Chromen-4-One	9.47755	0.030303	0.0914047
HMDB0247095	NA	6-N-Propyluracil	2.98275	0.030303	0.0914047
NA	NA	4-Hydroxy-3-[(4-Hydroxy-2-Oxo-8-Phenyl(3-Hydroquinolyl))(4-Methylthiophenyl)Me Thyl-1-Phenylhydroquinolin-2-One	0.163579	0.030303	0.0914047
NA	NA	3-Phenyl-2-(Pyrrolidin-2-Ylformamido)Propanoic Acid	5.99866	0.030303	0.0914047
NA	NA	3-Hydroxy-N-(1-Hydroxy-4-Methylpentan-2-Yl)-5-Oxo-6-Phenylhexanamide	6.36724	0.030303	0.0914047
HMDB0245805	NA	3-Amino-2,2-Dimethylpropanoic Acid	2.54588	0.030303	0.0914047
NA	NA	2-Methoxyethyl 5-Hydroxy-2-Methyl-1-{3-[(4-Nitrophenyl)AminoPropyl}Benzo[GIn Dole-3-Carboxylate	0.115958	0.030303	0.0914047
HMDB0000694	C03196	2-Hydroxyglutaric Acid, (S)-	2.28283	0.030303	0.0914047
HMDB0245134	NA	2-Furancarboximidamide	2.11515	0.030303	0.0914047
NA	NA	2-[5-[2-[2-[5-(2-Hydroxybutyl)Oxolan-2-YlPropanoyloxyButylOxolan-2-YlPropanoic Acid	5.59637	0.030303	0.0914047
HMDB0002074	NA	2,2-Dimethylsuccinic Acid	2.23476	0.030303	0.0914047
HMDB0000860	NA	2-(3-Phenylpropanamido)Acetic Acid	14.7216	0.030303	0.0914047
HMDB0036057	NA	1H-Pyrrole-2-Carboxaldehyde	2.29325	0.030303	0.0914047
HMDB0244733	NA	1H-Indene-1,2(3H)-Dione	4.18492	0.030303	0.0914047
NA	C16316	13(S)-hot	2.74885	0.030303	0.0914047
HMDB0244075	NA	1,2-Dihydroisoquinoline	2.74745	0.030303	0.0914047
HMDB0012133	C02351	1,2-Benzoquinone	3.79223	0.030303	0.0914047
HMDB0243498	NA	1-(3-Carboxypropyl)-3,7-Dimethylxanthine	6.82231	0.030303	0.0914047
NA	NA	(E)-5-Hydroxy-N-[3-[5-[3-[[(E)-5-Hydroxy-3-Methylpent-2-EnoylAminoPropyl-3,6-Dioxopiperazin-2-YlPropyl-3-Methylpent-2-Enamide	26.2559	0.030303	0.0914047
NA	NA	(7S,9E,11S,12R,13S,14S,15S,16R,17S,18S,19E,21Z)-13-(Acetyloxy)-15,17-Dihydroxy-11-Methoxy-3,7,12,14,16,18,22-Heptamethyl-6,23,27,29-Tetraoxo-8,30-Dioxa-24-Azatetracyclo[23.3.1.1^{4,7}.0^{5,28}Triaconta-1,3,5(28),9,19,21,25-Heptaen-2-Yl 4-Chlorobenzoa...	15.1284	0.030303	0.0914047
NA	NA	(+)-12-Hydroxyamorphigenin	47.6856	0.030303	0.0914047
NA	NA	N-(3-Chloro-4-Fluorophenyl)-2-{2-Oxo-4-[N-BenzylcarbamoylHydroquinolyl}Acetam Ide	24.4204	0.0340943	0.101186
HMDB0240261	NA	LPI(18:0)	29.2693	0.0340943	0.101186
HMDB0004207	C04700	Glutamyllysine	12.3146	0.0340943	0.101186
NA	NA	Beta-D-Glucopyranose, 1-O-[(2Alpha,3Beta,5Xi,9Xi,18Xi)-2,3,19-Trihydroxy-28-Oxours-12-En-28-Yl-	51.4484	0.0340943	0.101186
NA	NA	Apiopaenoside	10.734	0.0340943	0.101186
HMDB0000021	C02515	3-Iodotyrosine	86.2023	0.0340943	0.101186
NA	NA	3-[(2R,3S)-5-Hydroxy-2,3,8,8-Tetramethyl-4-Oxo-2,3-Dihydropyrano[2,3-HChromen-6-YlHexanoic Acid	204.006	0.0340943	0.101186
HMDB0028950	NA	Lysylglutamic Acid	36.9545	0.0353443	0.103703
HMDB0028828	NA	Glutamylserine	8.38343	0.0353443	0.103703
NA	NA	6-(N-{2-[2-Methyl-5-(Trifluoromethoxy)Indol-3-YlEthyl}Carbamoyl)Cyclohex-3-En Ecarboxylic Acid	8.40135	0.0353443	0.103703
NA	NA	2-[4-Hydroxy-2,5-Bis(Hydroxymethyl)-2-[3,4,5-Trihydroxy-6-(Hydroxymethyl)Oxan-2-YlOxyoxolan-3-YlOxy-6-(Hydroxymethyl)Oxane-3,4,5-Triol	9.45861	0.0353443	0.103703
NA	NA	1-Naphthalenecarboxylic Acid, 3-(Acetyloxy)-5-[2-(3-Furanyl)Ethyl-3,4,4A,5,6,7,8,8A-Octahydro-8A-(Hydroxymethyl)-5,6-Dimethyl-	67.5218	0.0353443	0.103703
HMDB0002302	NA	3-(Indol-3-Yl)Propionic Acid	Inf	0.044368	0.129885
NA	NA	N-(2,6-Dimethylphenyl)-2-[2-Oxo-4-(N-Propylcarbamoyl)HydroquinolylAcetamide	Inf	0.049746	0.13771
HMDB0000301	C00785	Urocanic Acid	1.82928	0.0519481	0.13771
NA	NA	Trichophycin B	20.7098	0.0519481	0.13771
NA	NA	Thr-Val-Leu	12.7734	0.0519481	0.13771
HMDB0062701	NA	TG(17:0/18:1/18:1)	0.230192	0.0519481	0.13771
NA	NA	Rhodojaponin II	12.9836	0.0519481	0.13771
HMDB0014730	C07973	Piperazine	2.42955	0.0519481	0.13771
HMDB0004610	C12144	Phytosphingosine	2.44651	0.0519481	0.13771
HMDB0000159	C00079	Phenylalanine	3.29963	0.0519481	0.13771
HMDB0001276	C00612	N1-Acetylspermidine	5.04594	0.0519481	0.13771
HMDB0013248	C03343	Mono-(2-Ethylhexyl)Phthalate	0.832009	0.0519481	0.13771
HMDB0028986	NA	Met-Val	29.1864	0.0519481	0.13771
HMDB0254615	NA	Methyl Syringate	9.61061	0.0519481	0.13771
HMDB0000182	C00047	Lysine	3.83789	0.0519481	0.13771
HMDB0253648	NA	Isoindoline	3.29929	0.0519481	0.13771
HMDB0000157	C00262	Hypoxanthine	0.462883	0.0519481	0.13771
HMDB0012273	NA	Hexadecanamide	0.605101	0.0519481	0.13771
NA	NA	Glu-Val-Phe	3.17748	0.0519481	0.13771
HMDB0038457	C16952	Dihydrocapsaicin	27.8749	0.0519481	0.13771
NA	NA	Deacetoxy-7-Oxogedunin	30.2484	0.0519481	0.13771
HMDB0000089	C00475	Cytidine	5.8564	0.0519481	0.13771
HMDB0014405	C08057	Cycloserine	3.32893	0.0519481	0.13771
HMDB0000564	C00157	Colfosceril Palmitate	0.389927	0.0519481	0.13771
NA	NA	Carpachromene	20.6361	0.0519481	0.13771
HMDB0002322	C01672	Cadaverine	4.02484	0.0519481	0.13771
HMDB0249370	C09920	Brazilin	16.3993	0.0519481	0.13771
NA	C10645	Atalaphylline	15.7908	0.0519481	0.13771
HMDB0000462	C01551	Allantoin	1.82132	0.0519481	0.13771
HMDB0028686	C20958	Alanylglutamic Acid	4.90583	0.0519481	0.13771
HMDB0060427	C02659	Acetone Cyanohydrin	2.12631	0.0519481	0.13771
HMDB0247909	NA	Acetoacetaldehyde	1.75988	0.0519481	0.13771
NA	NA	6-Hydroxymethyl-2,2-Dimethyl-Dihydro-Furo(3,4-D)(1,3)Dioxol-4-One	0.225977	0.0519481	0.13771
NA	NA	6,8-Bis(Morpholino-4-Iummethyl)-4-Oxo-3-(4-(((2S,3R,4S,5S,6R)-3,4,5-Trihydroxy-6-(Hydroxymethyl)Tetrahydro-2H-Pyran-2-Yl)Oxy)Phenyl)-4H-Chromene-5,7-Bis(Olate)	0.194574	0.0519481	0.13771
HMDB0002894	C02376	5-Methylcytosine	1.49493	0.0519481	0.13771
HMDB0000095	C00055	5-CMP	7.14842	0.0519481	0.13771
HMDB0011600	C00913	3-Methyladenine	3.8117	0.0519481	0.13771
HMDB0003540	C01367	3-Adenylic Acid	9.87745	0.0519481	0.13771
HMDB0246113	NA	3,5-Dideoxythymidine	7.62707	0.0519481	0.13771
HMDB0002035	C00811	2-Propenoic Acid, 3-(4-Hydroxyphenyl)-, (2Z)-	2.91027	0.0519481	0.13771
HMDB0013751	C02502	2-Hydroxypyridine	2.68515	0.0519481	0.13771
HMDB0001975	NA	2-Ethyl-2-Hydroxybutyric Acid	3.25163	0.0519481	0.13771
NA	NA	2-{4-[4-{3,5-Dihydroxy-4-[3,4,5-Trihydroxy-6-(Hydroxymethyl)Oxan-2-YlPhenyl}-2,5-Bis(4-Hydroxyphenyl)Oxolan-3-Yl-2,6-Dihydroxyphenyl}-6-(Hydroxymethyl)Oxane-3,4,5-Triol	0.183277	0.0519481	0.13771
NA	NA	2-[1-(4-Methoxyphenyl)(1,2,3,4-Tetrahydrobeta-Carbolin-2-Yl)-N-Naphthylacetam Ide	5.02756	0.0519481	0.13771
NA	NA	[6-[6-[6-[4,5-Dihydroxy-6-[(2E,6E)-10-Hydroxy-2,6,10-Trimethyldodeca-2,6,11-Trienoxy-2-Methyloxan-3-YlOxy-4,5-Dihydroxy-2-Methyloxan-3-YlOxy-4,5-Dihydroxy-2-Methyloxan-3-YlOxy-4,5-Dihydroxy-2-Methyloxan-3-Yl Acetate	0.295895	0.0519481	0.13771
NA	NA	[5-Acetyloxy-3-(Hydroxymethyl)-2-Oxo-6-Propan-2-Ylcyclohex-3-En-1-Yl 3-Methylbutanoate	6.46202	0.0519481	0.13771
NA	NA	[(6Z,10Z)-6-(Acetyloxymethyl)-10-(Hydroperoxymethyl)-3-Methylidene-2-Oxo-3A,4,5,8,9,11A-Hexahydrocyclodeca[BFuran-4-Yl 2-Methylbutanoate	1.75697	0.0519481	0.13771
NA	NA	Isoleucyl-Glycyl-Isoleucine	130.02	0.0530274	0.139711
NA	NA	2-[1-[4,5-Dihydroxy-3-[(2S,3R,4S,5S,6R)-3,4,5-Trihydroxy-6-(Hydroxymethyl)Oxan-2-YlOxyoxan-2-YlIndol-3-YlAcetic Acid	4.74213	0.0530274	0.139711
NA	NA	[(3As,6Z,10Z,11Ar)-6-(Hydroxymethyl)-3-Methylidene-2-Oxo-3A,4,5,8,9,11A-Hexahydrocyclodeca[BFuran-10-YlMethyl Acetate	84.4626	0.0530274	0.139711
HMDB0251975	C06522	Strychnine	75.7463	0.0546812	0.141754
NA	NA	PG 16:0_20:5;O	10.0247	0.0546812	0.141754
NA	NA	N-[(1E)-2-(3,4,5-Trimethoxyphenyl)-1-Azavinyl-N-(2-Methylphenyl)Butane-1,4-D Iamide	7.46474	0.0546812	0.141754
NA	NA	Cyclo(Glycyltryptophylprolylglycylvalylglycyl-Beta-Hydroxytyrosyl)	0.0135395	0.0546812	0.141754
HMDB0001261	C05770	Coproporphyrin III	4.93772	0.0546812	0.141754
NA	C10933	Amidosulfuron	4.28576	0.0546812	0.141754
HMDB0000350	NA	3-Hydroxysebacic Acid	12.8591	0.0546812	0.141754
HMDB0041277	NA	3-[3-Carboxy-2,3-Dihydro-2-(4-Hydroxy-3-Methoxyphenyl)-7-Methoxy-5-Benzofuranyl-2-Propenoic Acid	8.51362	0.0546812	0.141754
HMDB0256511	C10746	Phyllanthin	5.75239	0.0821386	0.194837
HMDB0252730	NA	16Beta-Hydroxydigitoxigenin	28.7736	0.0821386	0.194837
HMDB0000251	C00245	Taurine	2.43125	0.0822511	0.194837
HMDB0006695	NA	Prolylhydroxyproline	2.93	0.0822511	0.194837
HMDB0029010	NA	Prolylalanine	5.16151	0.0822511	0.194837
HMDB0000857	C02656	Pimelic Acid	1.714	0.0822511	0.194837
HMDB0001565	C00588	Phosphocholine	3.57935	0.0822511	0.194837
HMDB0001488	C00253	Niacin	5.10885	0.0822511	0.194837
HMDB0032805	NA	N-Feruloyloctopamine	2.24788	0.0822511	0.194837
HMDB0000230	C00270	N-Acetylneuraminic Acid	3.66807	0.0822511	0.194837
HMDB0000781	C16265	N-Acetylgalactosamine 4-Sulfate	7.28542	0.0822511	0.194837
NA	NA	N-[2-(3,4-Dimethoxyphenyl)Ethyl-2-(4-Methylphenoxy)Acetamide	20.6355	0.0822511	0.194837
HMDB0033752	C01198	Melilotic Acid	2.91834	0.0822511	0.194837
HMDB0033923	C16434	L-Isoleucinel-Isoleucine	0.818479	0.0822511	0.194837
HMDB0000190	C00186	Lactic Acid	3.36979	0.0822511	0.194837
HMDB0028900	NA	Isoleucyl-Alanine	11.4182	0.0822511	0.194837
NA	NA	Hypothallin	13.7397	0.0822511	0.194837
HMDB0030310	C06536	Harmaline	4.42771	0.0822511	0.194837
NA	NA	Dimethenamide Esa	0.225775	0.0822511	0.194837
HMDB0000634	C02226	Citraconic Acid	1.29354	0.0822511	0.194837
HMDB0000097	C00114	Choline	2.0707	0.0822511	0.194837
HMDB0000043	C00719	Betaine	1.81952	0.0822511	0.194837
HMDB0032929	C14512	Benzofuran	4.1508	0.0822511	0.194837
HMDB0000706	NA	Aspartyl-Phenylalanine	6.97967	0.0822511	0.194837
HMDB0001263	C04076	Allysine	2.23662	0.0822511	0.194837
HMDB0255052	C03137	Acetyltryptophan	18.134	0.0822511	0.194837
HMDB0247457	NA	8-Oxo-7,8-Dihydrodeoxyguanine	4.66758	0.0822511	0.194837
HMDB0247450	NA	8-Methylquinoline	2.69242	0.0822511	0.194837
NA	NA	6-Amino-4-(4-Hydroxy-5-Methoxy-3-Nitrophenyl)-3-Methyl-1-Phenyl-4H-Pyrano[3,2- DPyrazole-5-Carbonitrile	6.75863	0.0822511	0.194837
NA	NA	6-Acetyloxy-7-Ethenyl-1,4A,7-Trimethyl-3,4,4B,5,6,8,10,10A-Octahydro-2H-Phenanthrene-1-Carboxylic Acid	9.18481	0.0822511	0.194837
HMDB0011718	C00633	4-Hydroxybenzaldehyde	3.2815	0.0822511	0.194837
NA	NA	4H-Phenanthro[10,1-BcFuran-4-One, Tetradecahydro-1,2,6,9,10-Pentahydroxy-3,10A,10C-Trimethyl-7-Methylene-, (1S,2R,3R,5As,6R,9S,10S,10As,10Cr)-	2.41576	0.0822511	0.194837
HMDB0000779	C01479	3-Phenyllactic Acid	2.78417	0.0822511	0.194837
NA	NA	3-Indol-3-Yl-2-[(4-Methoxyphenyl)CarbonylaminoPropanoic Acid	1.58263	0.0822511	0.194837
HMDB0061654	NA	3-Hydroxyundecanoic Acid	0.104787	0.0822511	0.194837
HMDB0061655	NA	3-Hydroxytridecanoic Acid	0.125501	0.0822511	0.194837
HMDB0060371	C02514	3-Fumarylpyruvate	4.38824	0.0822511	0.194837
HMDB0029636	C07214	2-Methylbenzaldehyde	1.7309	0.0822511	0.194837
HMDB0062676	NA	2-Hydroxyacrylic Acid	1.69659	0.0822511	0.194837
NA	NA	2-((7-Acetamido-1,2,3-Trimethoxy-9-Oxo-5,6,7,9-Tetrahydrobenzo[AHeptalen-10-Yl)Amino)-N-(3-(3,4-Dimethoxyphenethyl)-1H-1,2,4-Triazol-5-Yl)-4-(Methylthio)Butanamide	5.17183	0.0822511	0.194837
HMDB0041287	NA	16-Hydroxy-10-Oxohexadecanoic Acid	0.739411	0.0822511	0.194837
NA	NA	1-(Aminocarbonyl)-L-Proline	3.65778	0.0822511	0.194837
NA	NA	[4-(Phenylcarbonyl)Phenyl-N-[(3,4,5-Trimethoxyphenyl)MethylCarboxamide	6.55286	0.0822511	0.194837
NA	NA	[(2R,3S,4S,5R,6S)-3,4-Dihydroxy-6-[3,7,8-Trihydroxy-2-(4-Hydroxy-3-Methoxyphenyl)-4-Oxochromen-5-YlOxy-5-[(2S,3R,4R,5R,6S)-3,4,5-Trihydroxy-6-Methyloxan-2-YlOxyoxan-2-YlMethyl Acetate	0.0991305	0.0822511	0.194837
NA	NA	[(2R,3S,4S,5R,6S)-3,4,5-Trihydroxy-6-[(2S,3R,4S,5S,6R)-3,4,5-Trihydroxy-6-(Hydroxymethyl)Oxan-2-YlOxyoxan-2-YlMethyl 8-Methylnonanoate	15.6959	0.0822511	0.194837
NA	NA	[(10Z)-6,10-Bis(Hydroxymethyl)-3-Methylidene-2-Oxo-3A,4,5,6,7,8,9,11A-Octahydrocyclodeca[BFuran-4-Yl 2-Methylprop-2-Enoate	6.31593	0.0822511	0.194837
HMDB0010728	NA	(R)-3-Hydroxydodecanoic Acid	0.0745016	0.0822511	0.194837
NA	NA	Ethyl 2-Amino-4-(2,6-Dichlorophenyl)-6-(Hydroxymethyl)-8-Oxo-4H-Pyrano[3,2-BP Yran-3-Carboxylate	6.00386	0.0995755	0.235013
HMDB0036998	NA	(S)-Oleuropeic Acid	2.05003	0.0995755	0.235013
HMDB0062551	NA	4-Ethylphenylsulfate	Inf	0.112196	0.264315
NA	NA	3-Indol-3-Yl-2-{[(7-Methyl-3-Oxo(2H,4H-Benzo[3,4-E1,4-Oxazaperhydroin-6-Yl))S UlfonylAmino}Propanoic Acid	14.3068	0.117306	0.26526
HMDB0006351	NA	Vaccenyl Carnitine	0.309085	0.119846	0.26526
NA	NA	N-(4-Fluorophenyl)-2-(4-Hydroxyquinazolin-2-Ylthio)Acetamide	0.0808344	0.119846	0.26526
HMDB0251174	NA	Dibutylamine	0.317277	0.119846	0.26526
HMDB0015465	D01366	Bezafibrate	3.05044	0.119846	0.26526
NA	NA	6-Ethoxy-4-({4-[(4-Methoxyphenyl)MethylPiperazinyl}Methyl)Chromen-2-One	28.9933	0.119846	0.26526
NA	NA	1-Isopropyl-1,2,3,4,-Tetrahydro-Beta-Carboline-3-Carboxylic Acid	20.5713	0.119846	0.26526
NA	NA	Triptophenolide	0.253361	0.125541	0.26526
NA	NA	Tetrasaccharides	2.24251	0.125541	0.26526
NA	NA	Subsessiline	0.541588	0.125541	0.26526
HMDB0001256	C00750	Spermine	2.01213	0.125541	0.26526
HMDB0000792	C08277	Sebacic Acid	6.04881	0.125541	0.26526
NA	NA	Propylene Glycol Phenyl Ether	2.31843	0.125541	0.26526
HMDB0041993	NA	Pivaloylcarnitine	2.99307	0.125541	0.26526
HMDB0040733	C00548	Phenyl Acetate	0.572159	0.125541	0.26526
NA	NA	PFAP-PAP	1.89074	0.125541	0.26526
HMDB0001858	C01468	P-Cresol	1.89513	0.125541	0.26526
NA	NA	Okaramine R	17.1815	0.125541	0.26526
HMDB0001645	C01933	Norleucine	4.83271	0.125541	0.26526
HMDB0061006	NA	Norfentanyl	3.93769	0.125541	0.26526
HMDB0002141	NA	N-Methyl-A-Aminoisobutyric Acid	2.62007	0.125541	0.26526
HMDB0255165	NA	N-Lauroylsarcosine	0.708592	0.125541	0.26526
HMDB0001186	C02567	N-Acetylspermine	70.9932	0.125541	0.26526
HMDB0003357	C00437	N-Acetylornithine	2.54616	0.125541	0.26526
HMDB0004620	NA	N-Acetyl-L-Arginine	2.21928	0.125541	0.26526
HMDB0061684	NA	N-Acetylisoleucine	1.62823	0.125541	0.26526
HMDB0014363	C07663	Moxifloxacin	39.9973	0.125541	0.26526
NA	NA	Methyl 2-[(3-Formamido-2-Hydroxybenzoyl)Amino-3-Hydroxybutanoate	3.08876	0.125541	0.26526
HMDB0301734	NA	Methoxyphenylacetic Acid	3.2236	0.125541	0.26526
HMDB0000172	C00407	L-Isoleucine	4.86225	0.125541	0.26526
NA	NA	Lignocaine N-Oxide	0.477297	0.125541	0.26526
HMDB0033854	C21402	Isoprenyl Alcohol	5.41222	0.125541	0.26526
HMDB0000333	NA	Isohomovanillic Acid	4.04351	0.125541	0.26526
HMDB0000671	C02043	Indole-3-Lactic Acid	3.16591	0.125541	0.26526
HMDB0000734	C21283	Indole-3-Acrylic Acid	3.33473	0.125541	0.26526
HMDB0059622	C03081	Hymecromone	3.72928	0.125541	0.26526
HMDB0000714	C01586	Hippuric Acid	0.218183	0.125541	0.26526
HMDB0000439	NA	Furoylglycine	2.852	0.125541	0.26526
HMDB0003045	C05570	Ergothioneine	5.9143	0.125541	0.26526
HMDB0302261	NA	Di-N-Propylamine	2.83024	0.125541	0.26526
HMDB0000076	C00429	Dihydrouracil	2.0906	0.125541	0.26526
HMDB0000630	C00380	Cytosine	4.28593	0.125541	0.26526
HMDB0000904	C00327	Citrulline	3.29202	0.125541	0.26526
HMDB0036213	NA	Cis-3-Hexenyl Lactate	0.330784	0.125541	0.26526
HMDB0000930	C10438	Cinnamic Acid	3.36004	0.125541	0.26526
NA	NA	C17-Sphinganine	6.40711	0.125541	0.26526
HMDB0000044	C00072	Ascorbic Acid	58.8561	0.125541	0.26526
HMDB0015348	C08159	Anastrozole	7.76154	0.125541	0.26526
HMDB0000448	C06104	Adipic Acid	0.741012	0.125541	0.26526
NA	NA	8-[(2-Chlorophenyl)Methylthio-3-Methyl-7-[(3-Methylphenyl)Methyl-1,3,7-Trihy Dropurine-2,6-Dione	0.0459622	0.125541	0.26526
HMDB0040408	NA	7-Hydroxy-2-Methyl-4-Oxo-4H-1-Benzopyran-5-Acetic Acid	3.85297	0.125541	0.26526
HMDB0061658	NA	3-Hydroxyhexadecanoic Acid	0.543016	0.125541	0.26526
HMDB0240312	C05822	3-Cytidylic Acid	2.425	0.125541	0.26526
NA	NA	2-O-Methylinosine	1.73958	0.125541	0.26526
HMDB0039332	NA	2-(6-P-Coumaroylglucosyl)Quercitrin	0.309301	0.125541	0.26526
HMDB0243989	NA	1-Pentyl-3-(1-Naphthoyl) Indole	5.95193	0.125541	0.26526
HMDB0031507	NA	1-Hydroxy-2-Butanone	1.99423	0.125541	0.26526
HMDB0244157	NA	1,3-Benzodioxole-5,6-Diamine	2.95515	0.125541	0.26526
HMDB0010386	C04100	1-(9Z,12Z-Octadecadienoyl)-Sn-Glycero-3-Phosphocholine	0.0670324	0.125541	0.26526
NA	NA	[1,3,12-Triacetyloxy-17-(Furan-3-Yl)-4,4,8,10,13-Pentamethyl-2,3,5,6,7,9,11,12,16,17-Decahydro-1H-Cyclopenta[APhenanthren-7-Yl 2-Hydroxy-3-Methylpentanoate	0.279049	0.125541	0.26526
NA	NA	(2S,4R,9Beta,16Alpha,17Xi,23E)-2-(Beta-D-Glucopyranosyloxy)-16,20-Dihydroxy-9,10,14-Trimethyl-1,11,22-Trioxo-4,9-Cyclo-9,10-Secocholesta-5,23-Dien-25-Yl Acetate	0.204565	0.125541	0.26526
NA	NA	(2S)-2-[(Tert-Butoxy)Carbonylamino-3-[BenzyloxycarbonylPropanoic Acid	3.01819	0.125541	0.26526
NA	NA	(2R,3S,4S,5S,6S)-2-(((2R,3R,4S,5S,6R)-2-Hydroxy-5-(((2R,3R,4R,5S,6R)-5-Hydroxy-4-(((2R,3R,4R,5S,6R)-3,4,5-Trihydroxy-6-(Hydroxymethyl)Tetrahydro-2H-Pyran-2-Yl)Oxy)-3-(((2R,3R,4R,5S)-3,4,5-Trihydroxytetrahydro-2H-Pyran-2-Yl)Oxy)-6-((((2R,3R,4S,5S)-3,4,...	3.57593	0.125541	0.26526
HMDB0304820	C05944	Pantothenol	0	0.166994	0.341998
NA	NA	1-[4,5-Bis(Hydroxymethyl)-3-Methoxy-2-Methylphenoxy-3-Methylbutane-2,3-Diol	3.72332	0.166994	0.341998
HMDB0005038	C07572	Citalopram	1.67335	0.16993	0.341998
NA	NA	8-(Diethylamino)Octyl-3,4,5-Trimethoxybenzoate Hydrochloride53464-72-5	2.36789	0.16993	0.341998
HMDB0000291	C05584	Vanilmandelic Acid	0.905978	0.177489	0.341998
NA	NA	Triacetylfusarinine C	0.111778	0.177489	0.341998
HMDB0031087	NA	Trans-2-Hexyl-1-Cyclopropaneacetic Acid	0.590537	0.177489	0.341998
HMDB0000167	C00188	Threonine	5.04585	0.177489	0.341998
HMDB0032523	C19524	Succinic Anhydride	1.40234	0.177489	0.341998
HMDB0000893	C08278	Suberic Acid	0.681023	0.177489	0.341998
HMDB0000271	C00213	Sarcosine	1.50277	0.177489	0.341998
HMDB0015095	C07445	Pindolol	6.6174	0.177489	0.341998
NA	NA	PFCA-unsaturated	0.289234	0.177489	0.341998
HMDB0007949	C00157	PC(15:0/20:4(5Z,8Z,11Z,14Z))	0.837763	0.177489	0.341998
NA	NA	N-Fructosyl Isoleucylglutamate	3.84954	0.177489	0.341998
NA	NA	N-Butylbenzenesulfonamide	0.822446	0.177489	0.341998
HMDB0000512	C03519	N-Acetylphenylalanine	2.02874	0.177489	0.341998
HMDB0000803	C03878	N-Acetylglucosamine	3.04447	0.177489	0.341998
NA	NA	Methyl 2-{[4-(Acetylamino)PhenylCarbonylamino}Acetate	2.67578	0.177489	0.341998
HMDB0000355	C03761	Meglutol	1.40172	0.177489	0.341998
HMDB0302955	NA	Manghaslin	1.7787	0.177489	0.341998
HMDB0001296	C02052	Maltotetraose	4.31735	0.177489	0.341998
NA	NA	LPI(19:0)	4.96571	0.177489	0.341998
HMDB0253897	NA	L-Isoleucinamide	2.3093	0.177489	0.341998
HMDB0000641	C00064	L-Glutamine	1.30708	0.177489	0.341998
HMDB0000510	C00956	L-Alpha-Aminoadipate	4.38433	0.177489	0.341998
HMDB0000592	C04132	Glucosamine 6-O-Sulfate	0.815805	0.177489	0.341998
HMDB0014936	C11334	Gentamicin Sulfate	5.18169	0.177489	0.341998
HMDB0000112	C00334	GABA	2.0418	0.177489	0.341998
HMDB0015082	D01161	Fulvestrant	4.25309	0.177489	0.341998
HMDB0005960	NA	D-Pipecolic acid	1.84727	0.177489	0.341998
HMDB0000163	C00208	D-Maltose	0.304977	0.177489	0.341998
HMDB0000071	C05512	Deoxyinosine	1.99477	0.177489	0.341998
HMDB0249836	C01564	Cetraxate	2.14139	0.177489	0.341998
HMDB0002013	C02862	Butyrylcarnitine	2.26782	0.177489	0.341998
HMDB0248559	NA	Arachidoyl Ethanolamide	1.44266	0.177489	0.341998
HMDB0030994	NA	5-Heptyltetrahydro-2-Oxo-3-Furancarboxylic Acid	2.19	0.177489	0.341998
HMDB0247018	C19642	5Beta-Cholanic Acid	1.53867	0.177489	0.341998
NA	NA	4,5-Dihydroxy-4,5,6-Trimethyl-2,8-Dioxa-13-Azatricyclo[8.5.1.013,16Hexadec-10-Ene-3,7-Dione	1.86513	0.177489	0.341998
HMDB0061657	NA	3-Hydroxypentadecanoic Acid	0.166701	0.177489	0.341998
HMDB0029171	NA	3-Hydroxyadipic Acid 3,6-Lactone	1.6198	0.177489	0.341998
HMDB0000331	C01921	3A,7B,12A-Trihydroxyoxocholanyl-Glycine	3.16804	0.177489	0.341998
NA	NA	3,5,7,10,15-O-Pentacetyl-14-O-Benzoyl-10,18-Dihydromyrsinol	0.107492	0.177489	0.341998
HMDB0246030	NA	3,4-Dihydropyridine	2.45928	0.177489	0.341998
HMDB0247125	NA	2-Pyrazinoylguanidine	2.58719	0.177489	0.341998
HMDB0003771	NA	2-Methylacetoacetic Acid	3.26816	0.177489	0.341998
NA	NA	2-Methoxy-6-[(Triphenylmethoxy)Methyl-2H-3,4,5,6-Tetrahydropyran-3,4,5-Triol	0.471104	0.177489	0.341998
HMDB0245092	NA	2-Cyclopenten-1-One	1.50089	0.177489	0.341998
HMDB0004666	C13856	2-Arachidonoylglycerol	1.98717	0.177489	0.341998
NA	NA	2-[(2E)-3,7-Dimethylocta-2,6-Dienyl-3-Methoxy-5-(2-Phenylethyl)Phenol	13.0756	0.177489	0.341998
NA	NA	2,3,4,6-Tetrahydroxy-5-Oxo-5H-Benzo[7Annulene-8-Carboxylic Acid	1.44196	0.177489	0.341998
HMDB0002287	NA	2(3H)-Thiophenone, 3-Aminodihydro-, (S)-	2.93413	0.177489	0.341998
NA	NA	16-Butan-2-Yl-10,11,14-Trimethyl-13-Propan-2-Yl-3-Prop-2-Enyl-4-Oxa-1,8,11,14,17-Pentazabicyclo[17.3.0Docosane-2,5,9,12,15,18-Hexone	1.57709	0.177489	0.341998
NA	NA	1,2-Dihexanoyl-Sn-Glycerol	2.59969	0.177489	0.341998
NA	NA	[(2R,3S,4S,5R,6R)-6-[1,7-Bis(3,4-Dihydroxyphenyl)-5-Oxoheptan-3-YlOxy-3,4,5-Trihydroxyoxan-2-YlMethyl (E)-3-(3,4-Dimethoxyphenyl)Prop-2-Enoate	0.155483	0.177489	0.341998
NA	NA	(2R)-2-((2S,3R)-3-Methyl-2-((7S)-5-Oxo-7,8,13,13B-Tetrahydro-5H-Benzo[1,2Indolizino[8,7-BIndole-7-Carboxamido)Pentanamido)Propanoic Acid	31.5762	0.177489	0.341998
NA	NA	(2E,6E)-3,7,11,15,19,23,27,31,35-Nonamethylhexatriaconta-2,6,34-Triene-1,10,11,15,19,23,27,31-Octol	2.89218	0.177489	0.341998
NA	NA	(1R,3As,3Br,6Ar,7As,9R,11R,11As,12Ar,13Ar,15Ar)-3A,11,11A-Trihydroxy-9,15A-Dimethyl-1-(5-Oxo-2,5-Dihydro-3-Furanyl)Icosahydro-7Ah,13Ah-Cyclopenta[7,8Phenanthro[2,3-BPyrano[3,2-E[1,4Dioxine-13A-Carbaldehyde	3.85045	0.177489	0.341998
NA	NA	(1As,2Z,4E,14R,15As)-8-Chloro-9,11-Dihydroxy-14-Methyl-1A,14,15,15A-Tetrahydro-6H-Oxireno[E[2Benzoxacyclotetradecine-6,12(7H)-Dione	0.262351	0.177489	0.341998
HMDB0302836	NA	Sativic Acid	0.620708	0.234267	0.429903
NA	NA	PFAP-diPAP	2.25414	0.234267	0.429903
NA	NA	Methyl 2-Amino-4-(2-Bromophenyl)-5-Oxo-4H-Pyrano[3,2-CChromene-3-Carboxylate	0.561822	0.234267	0.429903
HMDB0243972	NA	1-Nonadecanoyl-Glycero-3-Phosphoserine	0.0487418	0.234267	0.429903
NA	NA	1,3-Dichloro-6,7,8,9,10,12-Hexahydroazepino[2,1-BQuinazoline	0.133851	0.234267	0.429903
NA	NA	(2E)-3-(2H-Benzo[3,4-D1,3-Dioxolen-5-Yl)-2-(Acetylamino)-N-Benzylprop-2-Enami De	1.7923	0.234267	0.429903
HMDB0000875	C01004	Trigonelline	2.0462	0.246753	0.429903
HMDB0259164	C14439	Tributyl Phosphate	1.54424	0.246753	0.429903
HMDB0029835	NA	Tetrahydroharmol	3.06906	0.246753	0.429903
HMDB0000872	C11002	Tetradecanedioic Acid	0.722947	0.246753	0.429903
HMDB0000953	NA	Suberylglycine	2.59647	0.246753	0.429903
HMDB0034146	C13846	Stearic Acid Amide	0.788645	0.246753	0.429903
HMDB0014351	C06539	Reserpine	0.096298	0.246753	0.429903
HMDB0015044	C06527	Quinidine	1.39799	0.246753	0.429903
HMDB0000208	C00026	Oxoglutaric Acid	1.33024	0.246753	0.429903
HMDB0000446	C12989	N-Alpha-Acetyl-L-Lysine	9.65052	0.246753	0.429903
HMDB0240253	C19478	N-Acetyltaurine	1.34444	0.246753	0.429903
HMDB0032562	C11016	N,N-Diphenylamine	1.77755	0.246753	0.429903
NA	NA	Myristamine Oxide	1.4773	0.246753	0.429903
HMDB0060656	C16561	Monoethylglycinexylidide	2.50691	0.246753	0.429903
HMDB0014550	D01046	Methylrosanilinium Chloride	33.6102	0.246753	0.429903
HMDB0253658	NA	Lysergol	4.24631	0.246753	0.429903
HMDB0006372	NA	L-Glyceric Acid	0.202576	0.246753	0.429903
HMDB0015086	C07054	Isoniazid	1.40643	0.246753	0.429903
NA	NA	Hydroxysuberic Acid	1.31481	0.246753	0.429903
HMDB0000177	C00135	Histidine	3.37333	0.246753	0.429903
HMDB0000672	C19615	Hexadecanedioic Acid	0.850375	0.246753	0.429903
HMDB0000125	C00051	Glutathione (Reduced)	0.764131	0.246753	0.429903
HMDB0003464	C01035	Gamma-Guanidinobutyric Acid	3.39845	0.246753	0.429903
HMDB0094691	C17602	Furanone A	1.76691	0.246753	0.429903
HMDB0014474	C06984	Ethambutol	26.8451	0.246753	0.429903
NA	NA	Dodecyl sulfate	3.25627	0.246753	0.429903
HMDB0013773	C01570	D-Leucine	1.48846	0.246753	0.429903
HMDB0251427	C14227	Dioctyl Phthalate	1.17299	0.246753	0.429903
HMDB0004983	C11142	Dimethyl Sulfone	2.16386	0.246753	0.429903
NA	NA	Difluoro(Perfluoromethoxy)Acetic Acid	0.952851	0.246753	0.429903
HMDB0037115	NA	Desmeninol	1.41126	0.246753	0.429903
HMDB0031340	C02824	Cyclamic Acid	1.18789	0.246753	0.429903
HMDB0000064	C00300	Creatine	1.40506	0.246753	0.429903
HMDB0240712	C14216	Bisphenol S	1.2552	0.246753	0.429903
NA	NA	Bis(2-Ethylhexyl) Sebacate	0.696646	0.246753	0.429903
NA	NA	Apiopaeonoside	2.22948	0.246753	0.429903
HMDB0000201	C02571	Acetyl-L-Carnitine	1.51266	0.246753	0.429903
HMDB0001138	C00624	Acetyl Glutamic Acid	1.77513	0.246753	0.429903
HMDB0302281	C08314	9,10-Dihydroxystearic Acid	0.641876	0.246753	0.429903
NA	NA	8-Hydroxy-9,10-Epoxystearic Acid	1.91815	0.246753	0.429903
HMDB0240845	NA	5-Methylpentadecanoylcarnitine	0.420173	0.246753	0.429903
HMDB0032988	NA	5-Hydroxymaltol	1.79251	0.246753	0.429903
HMDB0001161	C01181	4-Trimethylammoniobutanoate	1.56755	0.246753	0.429903
HMDB0030770	C10702	4-Hydroxy-3-(3-Methyl-2-Butenyl)Acetophenone	0.311459	0.246753	0.429903
HMDB0011664	NA	3-Methylene-Indolenine	2.40138	0.246753	0.429903
NA	NA	3-[4-({2-[(2E)-2-Buten-2-Yl-6,8-Dimethyl-1,2,4A,5,6,7,8,8A-Octahydro-1-Naphthalenyl}Carbonyl)-3-Hydroxy-5-Oxo-2,5-Dihydro-1H-Pyrrol-2-Yl-2-Hydroxy-2-Methylpropanoic Acid	2.02118	0.246753	0.429903
NA	NA	3,5-Dihydroxydecanoic Acid	2.80284	0.246753	0.429903
HMDB0246116	NA	3(2H)-Pyridazinone	0.667875	0.246753	0.429903
HMDB0245199	NA	2-Methoxy-3,4-Dimethylphenyl Acetate	2.79031	0.246753	0.429903
NA	NA	2-Butanone, 4-[3-(Beta-D-Glucopyranosyloxy)-4-Hydroxy-2,6,6-Trimethyl-1-Cyclohexen-1-Yl-	2.56472	0.246753	0.429903
HMDB0244994	NA	2-Amino-5-(Amino-Dimethylamino-Methylidene)Amino-Pentanoic Acid	4.28054	0.246753	0.429903
NA	NA	2-[5-[2-[2-[5-[2-[2-[5-[2-[2-[5-(2-Hydroxybutyl)Oxolan-2-YlPropanoyloxyPropylOxolan-2-YlPropanoyloxyPropylOxolan-2-YlPropanoyloxyPropylOxolan-2-YlPropanoic Acid	5.15301	0.246753	0.429903
NA	NA	2,6-Di-Tert-Butyl-4-Nitrophenol	0.88005	0.246753	0.429903
NA	NA	2,4-Dimethylbenzenesulfonic Acid	0.767652	0.246753	0.429903
NA	NA	2,3-Dihydroxypropyl 9,12,15-Octadecatrienoate	1.7732	0.246753	0.429903
NA	NA	2-((7-Acetamido-1,2,3-Trimethoxy-9-Oxo-5,6,7,9-Tetrahydrobenzo[AHeptalen-10-Yl)Amino)-N-(Furan-2-Ylmethyl)-3-Methylbutanamide	1.292	0.246753	0.429903
HMDB0010382	C04102	1-Palmitoyl-Sn-Glycero-3-Phosphocholine	0.37557	0.246753	0.429903
HMDB0249243	C03690	14C -Dehp	1.74103	0.246753	0.429903
NA	NA	13-O-P-Coumaroylplumieride	0.152816	0.246753	0.429903
NA	NA	12-Hydroxy-13-(Hydroxymethyl)-3,5,7-Trimethyl-2,4-Tetradecadienedioic Acid	1.71932	0.246753	0.429903
HMDB0030767	NA	11,12-Dimethoxydihydrokawain	2.18872	0.246753	0.429903
HMDB0033560	NA	(E)-5-(3,4,5,6-Tetrahydro-3-Pyridylidenemethyl)-2-Furanmethanol	0.770205	0.246753	0.429903
NA	NA	(E)-3-(Acetyloxymethyl)-5-(2-Formyl-4-Hydroxy-5,5,8A-Trimethyl-1,4,4A,6,7,8-Hexahydronaphthalen-1-Yl)Pent-2-Enoic Acid	2.45565	0.246753	0.429903
NA	NA	(3Beta,5Alpha,9Xi)-3-{[Beta-D-Glucopyranosyl-(1-6)-Beta-D-Glucopyranosyl-(1-4)-6-Deoxy-3-O-Methyl-Beta-L-IdopyranosylOxy}-14-Hydroxy-19-Oxocard-20(22)-Enolide	1.56343	0.246753	0.429903
NA	NA	(2E,4E,14E)-13-Hydroperoxy-1-Piperidin-1-Ylicosa-2,4,14-Trien-1-One	1.26484	0.246753	0.429903
HMDB0047909	NA	TG(14:1(9Z)/16:1(9Z)/16:1(9Z))	0	0.310863	0.521159
NA	NA	3-(6,7-Dimethoxy-1,2,3,4-Tetrahydroisoquinolin-1-Yl)Propan-1-Ol	2.2282	0.3142	0.521159
NA	NA	2-Furanacetic Acid, Tetrahydro-Alpha-Methyl-5-(2-Oxopropyl)-, 2,3-Dihydroxypropyl Ester	1.74817	0.3142	0.521159
NA	NA	2-(Benzimidazol-2-Ylmethylthio)-5,6-Dimethoxybenzimidazole	0.310273	0.3142	0.521159
HMDB0060101	NA	12 Hydroxy Arachidonic Acid	0.429162	0.3142	0.521159
NA	NA	[(2S,3S,4R,5R,6R)-5-Acetyloxy-3-Hydroxy-2-Methyl-6-[[(2R,3S,4S,5R,6S)-3,4,5-Trihydroxy-6-[5-Hydroxy-6-Methoxy-2-(4-Methoxyphenyl)-4-Oxochromen-7-YlOxyoxan-2-YlMethoxyOxan-4-Yl Acetate	0.142675	0.3142	0.521159
HMDB0000299	C01762	Xanthosine	4.41888	0.329004	0.521159
HMDB0000300	C00106	Uracil	1.57255	0.329004	0.521159
HMDB0000158	C00082	Tyrosine	1.44877	0.329004	0.521159
NA	NA	Theaflavin Monogallate A	0.274729	0.329004	0.521159
HMDB0094708	NA	Tetraethylene Glycol	0.910608	0.329004	0.521159
HMDB0006088	C06153	Scyllo-Inositol	1.48885	0.329004	0.521159
NA	NA	Pyroglu-Pro	1.01275	0.329004	0.521159
HMDB0001271	C01168	Pseudouridine 5-Phosphate	1.5648	0.329004	0.521159
HMDB0256790	C10986	Procymidone	1.39909	0.329004	0.521159
HMDB0256502	NA	Phthalimide	0.441835	0.329004	0.521159
NA	NA	PFSM-perfluoroalkyl_sulfonamide	2.17536	0.329004	0.521159
HMDB0031608	D03467	Peracetic Acid	1.45507	0.329004	0.521159
HMDB0000210	C00864	Pantothenic Acid	1.31318	0.329004	0.521159
HMDB0000214	C00077	Ornithine	1.48015	0.329004	0.521159
HMDB0013286	NA	N-Undecanoylglycine	0.929234	0.329004	0.521159
HMDB0013716	C01826	Norvaline	1.37415	0.329004	0.521159
HMDB0254636	NA	Methylene-Imidazole	1.68814	0.329004	0.521159
HMDB0041929	NA	Methoxyacetic Acid	1.12116	0.329004	0.521159
HMDB0240262	NA	LPC(16:0)	0.302334	0.329004	0.521159
HMDB0014372	C07074	Lovastatin	1.60312	0.329004	0.521159
HMDB0000761	C03990	Lithocholic Acid	1.33366	0.329004	0.521159
HMDB0000181	C00355	Levodopa	1.29166	0.329004	0.521159
HMDB0253801	NA	Kinetin Riboside	1.13247	0.329004	0.521159
HMDB0031195	C14743	Isophorone	2.12899	0.329004	0.521159
HMDB0028913	NA	Isoleucylmethionine	1.7092	0.329004	0.521159
NA	NA	Inaequalisine_A	2.65436	0.329004	0.521159
HMDB0061115	C09213	Hypaphorine	4.73696	0.329004	0.521159
HMDB0000763	C05635	Hydroxyindoleacetic Acid	1.21722	0.329004	0.521159
HMDB0030311	C06538	Harmine	6.03894	0.329004	0.521159
HMDB0242115	NA	Glyceryl Monolinoleate	1.36286	0.329004	0.521159
HMDB0011171	NA	Gamma-Glutamylleucine	1.93643	0.329004	0.521159
HMDB0000609	C00355	DOPA	1.23298	0.329004	0.521159
HMDB0251566	C13831	Dodecanamide	1.69904	0.329004	0.521159
HMDB0001046	NA	Cotinine	2.0603	0.329004	0.521159
HMDB0000426	C02612	Citramalic Acid	1.12333	0.329004	0.521159
HMDB0059839	C06076	Camphene	1.34561	0.329004	0.521159
NA	NA	Benzododecinium	2.03314	0.329004	0.521159
HMDB0000191	C00049	Aspartic Acid	1.61168	0.329004	0.521159
HMDB0001310	C01401	Alanine	1.38364	0.329004	0.521159
HMDB0001890	C06809	Acetylcysteine	3.84483	0.329004	0.521159
HMDB0033585	NA	Acesulfame	2.03243	0.329004	0.521159
HMDB0246781	NA	5-Dihydroxyhept-6-Enoic Acid	0.739665	0.329004	0.521159
HMDB0061656	NA	3-Hydroxytetradecanoic Acid	0.272866	0.329004	0.521159
HMDB0013127	NA	3-Hydroxybutyrylcarnitine	2.33293	0.329004	0.521159
HMDB0029170	NA	3-Hydroxy-4-Methoxymandelate	0.657611	0.329004	0.521159
NA	NA	3-(2,6-Dihydroxyphenyl)-4-Hydroxy-6-Methyl-3H-2-Benzofuran-1-One	0.815717	0.329004	0.521159
NA	NA	3-(12-Hydroxy-5,9-Dimethyl-4-Oxo-8-Oxatetracyclo[7.2.1.1~7,10~.0~1,6~Tridec-2-En-5-Yl)Propanoic Acid	2.49855	0.329004	0.521159
HMDB0061918	C12312	2-Oxindole	1.71777	0.329004	0.521159
HMDB0031158	NA	2-Methyl-4-Pentenoic Acid	2.12423	0.329004	0.521159
HMDB0000729	C21297	2-Hydroxyisobutyric Acid	0.362095	0.329004	0.521159
NA	NA	2-Decyl-3-Hydroxypentanedioic Acid	2.17244	0.329004	0.521159
HMDB0011692	C03104	2-CMP	2.25685	0.329004	0.521159
HMDB0247150	NA	2-Amino-6-Nitrobenzothiazole	2.10364	0.329004	0.521159
NA	NA	2,7-Naphthalenedisulfonic Acid	1.77645	0.329004	0.521159
HMDB0060677	C11004	2,6-Xylidine	2.20036	0.329004	0.521159
NA	NA	2,4-Dihydroxy-5-Methoxy-2A,5A,7-Trimethyldodecahydrodispiro[Furan-3,2-Furan-5,6-Naphtho[1,8-BcFuran-2(2AH)-One	6.00757	0.329004	0.521159
HMDB0245345	NA	2,2,6,6-Tetramethylpiperidin-1-Ol	1.99774	0.329004	0.521159
NA	NA	2,2,6,6-Tetramethyl-5-Hydroxy-4-(Alpha-Isopropyl-2,4,6-Trihydroxy-3-Isobutyrylbenzyl)-4-Cyclohexene-1,3-Dione	0.125375	0.329004	0.521159
NA	NA	2-(4,5-Dibromo-6-Hydroxy-3-Oxoxanthen-9-Yl)Benzoic Acid	1.56298	0.329004	0.521159
NA	NA	1-Methyl-3,4-Dihydro-2H-Pyrido[3,4-BIndole	2.70605	0.329004	0.521159
HMDB0062195	C04598	1-Hexadecyl-2-Acetyl-Glycero-3-Phosphocholine	0.176169	0.329004	0.521159
NA	NA	10-Norparvulenone	1.7557	0.329004	0.521159
NA	NA	1,4-Ethanonaphthalene-5,10-Dicarboxylic Acid, 1,4,4A,5,6,8A-Hexahydro-5,10-Dihydroxy-6,9-Dioxo-, Bis[[2-(Beta-D-Glucopyranosyloxy)-3-HydroxyphenylMethyl Ester	2.43813	0.329004	0.521159
NA	NA	1-(2,3-Dibenzimidazol-2-Ylpropyl)-2-Methoxybenzene	0.3594	0.329004	0.521159
HMDB0003033	D03363	(9S,14S)-10,13-Dimethylspiro[2,8,9,11,12,14,15,16-Octahydro-1H-Cyclopenta[APhenanthrene-17,5-Oxolane-2,3-Dione	0.611792	0.329004	0.521159
NA	NA	(5S)-17-Hydroxy-10,13-Dimethyltetradecahydro-1H-Cyclopenta[APhenanthren-3(2H)-One	1.8747	0.329004	0.521159
NA	NA	(3Beta,5Xi,9Xi,13Xi,16Beta,17Xi,22R,23R,24R)-3-{[Alpha-L-Arabinofuranosyl-(1-2)-[Beta-D-Glucopyranosyl-(1-3)-Alpha-L-ArabinopyranosylOxy}-20-Hydroxy-24-Methyl-16,23:16,30-Diepoxydammar-25-En-22-Yl Acetate	0.118806	0.329004	0.521159
NA	NA	(2E)-3-[5-(3,4-Dichlorophenyl)(2-Furyl)-2-(2-1,2,3,4-Tetrahydroisoquinolylcar Bonyl)Prop-2-Enenitrile	0.282175	0.329004	0.521159
NA	NA	Beta- Belladonnine Dichloroethylate	3.28382	0.360216	0.569901
NA	NA	N-(5-Chloro-2-Methoxyphenyl)-2-[9-(4-Methylphenyl)-6-Oxohydropurin-8-YlthioAc Etamide	9.88523	0.400394	0.598794
HMDB0001178	C00301	ADP-ribose	36.0121	0.400394	0.598794
HMDB0253233	C09866	Huperzine B	1.50617	0.407016	0.598794
HMDB0242414	C05464	Deoxycholylglycine	1.0223	0.407016	0.598794
NA	NA	Tert-Butyl 1-(2-Furylmethyl)-5-Hydroxy-2-Methylbenzo[GIndole-3-Carboxylate	2.24411	0.410248	0.598794
HMDB0041832	C10025	Baicalin	0.0766999	0.410248	0.598794
NA	NA	Ziyuglycoside I	1.26869	0.428571	0.598794
HMDB0000292	C00385	Xanthine	0.690018	0.428571	0.598794
HMDB0036818	NA	Vitispirane	1.82959	0.428571	0.598794
HMDB0001877	C07185	Valproic Acid	1.95449	0.428571	0.598794
HMDB0029082	NA	Trp-Glu	0.783976	0.428571	0.598794
NA	NA	Tris-(2-Chloroisopropyl)Phosphate	1.98443	0.428571	0.598794
HMDB0000043	C00719	Trimethyl Glycine	1.63465	0.428571	0.598794
HMDB0259191	NA	Triethyl Phosphate	2.46688	0.428571	0.598794
HMDB0002327	NA	Tridecanedioic Acid	1.53488	0.428571	0.598794
HMDB0031193	C19806	Tricarballylic Acid	3.89755	0.428571	0.598794
HMDB0000933	C16308	Traumatic Acid	0.558763	0.428571	0.598794
NA	NA	Tetradecyldiethanolamine	1.28596	0.428571	0.598794
NA	NA	Sparteine-15-Carboxylic Acid	2.60051	0.428571	0.598794
HMDB0003070	C00493	Shikimic Acid	1.91999	0.428571	0.598794
HMDB0014621	C07236	Rimantadine	1.53005	0.428571	0.598794
NA	NA	R-Deprenyl N-Oxide	1.61351	0.428571	0.598794
HMDB0000243	C00022	Pyruvate	2.36945	0.428571	0.598794
HMDB0060503	C07090	Protoanemonin	2.19259	0.428571	0.598794
HMDB0256501	NA	Phthalic Anhydride	1.55554	0.428571	0.598794
HMDB0006344	C04148	Phenylacetylglutamine	0.325325	0.428571	0.598794
HMDB0256329	NA	Perfluorooctanoic Acid	1.43306	0.428571	0.598794
HMDB0002329	C00209	Oxalic Acid	0.796709	0.428571	0.598794
HMDB0060997	NA	O-Desmethyl Tramadol	2.17636	0.428571	0.598794
HMDB0013279	NA	N-Nonanoylglycine	1.2434	0.428571	0.598794
HMDB0062183	NA	N-Lactoyl-Glycine	1.47378	0.428571	0.598794
HMDB0011757	NA	N-Acetylvaline	1.14017	0.428571	0.598794
NA	NA	N-(9-Oxodecyl)Acetamide	1.61542	0.428571	0.598794
HMDB0258416	NA	Mycotoxin F2;Toxin F2	0.473086	0.428571	0.598794
NA	NA	Mundulone	1.93209	0.428571	0.598794
HMDB0031581	C14452	Morpholine	1.40395	0.428571	0.598794
HMDB0001932	C07202	Metoprolol	1.88286	0.428571	0.598794
HMDB0000202	C02170	Methylmalonic Acid	1.3628	0.428571	0.598794
NA	NA	Methyl 3-Oxo-2-[(3,4,5-Trimethoxyphenyl)MethyleneBenzo[BFuran-5-Carboxylate	1.86656	0.428571	0.598794
HMDB0000696	C00073	Methionine	4.1671	0.428571	0.598794
NA	C08716	Malvidin	1.89386	0.428571	0.598794
NA	NA	Lauramine Oxide	1.39889	0.428571	0.598794
HMDB0032923	C14516	Kojic Acid	1.72422	0.428571	0.598794
HMDB0036790	C16983	Kobusone	2.19413	0.428571	0.598794
NA	NA	Isoprenylhydroquinone Glucoside	2.15018	0.428571	0.598794
HMDB0000128	C00581	Glycocyamine	1.42311	0.428571	0.598794
HMDB0006355	C02670	Glucurolactone	1.19845	0.428571	0.598794
HMDB0036103	C16461	Geranic Acid	1.34969	0.428571	0.598794
HMDB0000212	C01074	Galnac	1.44533	0.428571	0.598794
HMDB0254590	NA	Gallic Acid Methyl Ester	1.75453	0.428571	0.598794
HMDB0244507	NA	Erucamide	1.43097	0.428571	0.598794
HMDB0002151	C11143	Dimethyl Sulfoxide	1.35657	0.428571	0.598794
HMDB0251388	C11233	Dimethyl Phthalate	1.8126	0.428571	0.598794
NA	NA	Dimethyl Myristamine	2.25771	0.428571	0.598794
NA	NA	Diethyl Azelate	1.79899	0.428571	0.598794
HMDB0033244	C14214	Dibutyl Phthalate	1.6612	0.428571	0.598794
HMDB0036491	C08370	Diallyl Sulfide	1.31457	0.428571	0.598794
HMDB0116368	NA	DG(8:0/8:0/0:0)	1.86795	0.428571	0.598794
NA	NA	Delta9-Eremophilansaeure	0.865653	0.428571	0.598794
HMDB0014989	C06936	Dacarbazine	0.466904	0.428571	0.598794
HMDB0001314	C00942	Cyclic Gmp	0.682096	0.428571	0.598794
HMDB0004701	C14825	Coronaric Acid	1.17736	0.428571	0.598794
HMDB0030677	C00811	Cis-P-Coumaric Acid	1.58869	0.428571	0.598794
NA	NA	Beta-D-Glucopyranoside, 4-Hydroxy-3-(3-Methyl-2-Buten-1-Yl)Phenyl 6-O-[(2R,3R,4R)-Tetrahydro-3,4-Dihydroxy-4-(Hydroxymethyl)-2-Furanyl-	1.24411	0.428571	0.598794
HMDB0032049	C06354	Benzophenone	1.99839	0.428571	0.598794
HMDB0011747	C03557	Aminoethylphosphonic Acid	1.49096	0.428571	0.598794
HMDB0015554	D07440	Alverine	1.69463	0.428571	0.598794
HMDB0243703	NA	Alpha-Methyl-4-Carboxyphenylglycine	0.112114	0.428571	0.598794
HMDB0000034	C00147	Adenine	1.16757	0.428571	0.598794
HMDB0034159	NA	Acetyltributyl Citrate	1.85498	0.428571	0.598794
NA	NA	8-Hydroxy-13,14,15,16-Tetranor-12-Labdanoic Acid	1.76695	0.428571	0.598794
HMDB0004679	C14776	8(S)-Hete	0.730009	0.428571	0.598794
NA	NA	7-Hydroxy-N-Geranyl-L-Glutamic Acid	1.5392	0.428571	0.598794
HMDB0039664	NA	7-Ethyl-2,3,6,7-Tetrahydrocyclopent[BAzepin-8(1H)-One	1.4803	0.428571	0.598794
HMDB0030030	C07288	6-Methyl-5-Hepten-2-Ol	2.17037	0.428571	0.598794
NA	NA	6-Amino-4-(4-Hydroxyphenyl)-3-Propyl-4H-Pyrano[3,2-DPyrazole-5-Carbonitrile	1.68387	0.428571	0.598794
HMDB0303912	C09938	5-Hydroxycalamenene	2.00804	0.428571	0.598794
NA	NA	4-Methyoxybenzoyl-N-Glycine	0.260683	0.428571	0.598794
NA	NA	4-Methylphthalic Anhydride	2.11742	0.428571	0.598794
NA	NA	4-Methyl-11-(4-Sulfophenyl)Tridecanoic Acid	1.32382	0.428571	0.598794
HMDB0000500	C00156	4-Hydroxybenzoic Acid	1.68522	0.428571	0.598794
NA	NA	4-[3-Methyl-5-(5,6,7-Trihydroxy-1,2,4A,5-Tetramethyl-3,4,6,7,8,8A-Hexahydro-2H-Naphthalen-1-Yl)Pentoxy-4-Oxobutanoic Acid	1.62382	0.428571	0.598794
NA	NA	4-(3-(((2R,4S,5S,6R)-4,5-Dihydroxy-6-Methyltetrahydro-2H-Pyran-2-Yl)Oxy)-10-((E)-((4-Fluorophenethyl)Imino)Methyl)-5,14-Dihydroxy-13-Methylhexadecahydro-1H-Cyclopenta[APhenanthren-17-Yl)Furan-2(5H)-One	0.414227	0.428571	0.598794
NA	NA	3-[2-(2,3-Dihydroxy-5,6,8A-Trimethyloctahydro-2H-Spiro[Naphthalene-1,2-Oxiran-5-Yl)Ethyl-5-Hydroxyfuran-2(5H)-One	8.35173	0.428571	0.598794
HMDB0033001	NA	2-Methylbenzothiazole	2.19268	0.428571	0.598794
HMDB0033624	NA	2-Hydroxy-3-(2-Hydroxyphenyl)Propanoic Acid	1.36234	0.428571	0.598794
HMDB0001987	NA	2-Hydroxy-2-Methylbutyric Acid	0.711143	0.428571	0.598794
NA	NA	2H-Furo[3,2-BNaphtho[2,3-G[1,5Dioxonin-5,12-Dione, 2-[[6-O-[(2E)-3-[4-[(6-Deoxyhexopyranosyl)OxyPhenyl-1-Oxo-2-Propen-1-YlHexopyranosylOxy-3,3A,5A,6,14,14A-Hexahydro-3,8-Dihydroxy-2-(Hydroxymethyl)-6-(4-Hydroxyphenyl)-7,9-Dimethoxy-	2.65398	0.428571	0.598794
HMDB0001044	C00362	2-Deoxyguanosine 5-Phosphate	1.88647	0.428571	0.598794
HMDB0001906	C03665	2-Aminoisobutyric Acid	1.61618	0.428571	0.598794
HMDB0000252	C00319	2-Amino-4-Octadecene-1,3-Diol	1.3131	0.428571	0.598794
HMDB0246998	NA	2,6-Diamino-9-(2-Hydroxyethoxymethyl)Purine	1.1954	0.428571	0.598794
NA	C06670	2,4-Dichlorobenzoic Acid	2.1759	0.428571	0.598794
HMDB0303335	C10910	2-(Methylthio)Benzothiazole	2.05776	0.428571	0.598794
NA	NA	2-(7-Hydroxy-6-Methyloctyl)-2H-Furan-5-One	1.54439	0.428571	0.598794
HMDB0029886	NA	2-(3,4-Dihydroxyoxolan-2-Yl)-2-Hydroxyethyl (9E)-Octadec-9-Enoate	1.68384	0.428571	0.598794
HMDB0003331	C02494	1-Methyladenosine	2.30263	0.428571	0.598794
HMDB0240707	C11033	1-Aminomethylphosphonic Acid	1.79629	0.428571	0.598794
NA	NA	10-Ethyl-14-Methyl-12-Oxa-4-Azatetracyclo[7.6.1.0,.0,Hexadecan-13-One	1.67987	0.428571	0.598794
HMDB0059696	NA	1,2,3,4,Tetrahydro-1,5,7-Trimethylnapthalene	2.02451	0.428571	0.598794
HMDB0010737	NA	(R)-3-Hydroxy-Octadecanoic Acid	0.988478	0.428571	0.598794
HMDB0002264	NA	(R)-2-Hydroxycaprylic Acid	0.878048	0.428571	0.598794
NA	NA	(4Beta,6Alpha)-8-Daucene-4,6-Diol	1.58749	0.428571	0.598794
HMDB0061889	NA	(3E,5Z)-1,3,5-Heptatriene	2.02053	0.428571	0.598794
NA	NA	(3E)-7-Hydroxy-3,7-Dimethyl-3-Octen-1-Yl 6-O-(6-Deoxy-Alpha-L-Mannopyranosyl)-Beta-D-Glucopyranoside	2.38536	0.428571	0.598794
NA	NA	(2S,3S)-3-Decyl-2-Hydroxy-2-(3-Methoxy-3-Oxopropyl)Butanedioic Acid	1.54376	0.428571	0.598794
NA	NA	(2E,4E,14E)-13-Hydroperoxy-N-(2-Methylpropyl)Icosa-2,4,14-Trienamide	1.75481	0.428571	0.598794
NA	NA	(+)-Aspermytin A	1.45954	0.428571	0.598794
HMDB0060026	NA	Vanilloylglycine	0.588502	0.521869	0.690243
HMDB0252436	C18604	Forchlorfenuron	0.15575	0.521869	0.690243
NA	NA	Biotin Methyl Ester	0.0218684	0.521869	0.690243
HMDB0246588	NA	4-Thiouridine	0.29212	0.521869	0.690243
HMDB0040329	NA	Xi-5-Hydroxydecanoic Acid	0.634426	0.536797	0.690243
HMDB0003555	C02059	Vitamin K1	1.57918	0.536797	0.690243
HMDB0000289	C00366	Uric Acid	0.592566	0.536797	0.690243
NA	NA	Tschimganidin	0.905205	0.536797	0.690243
HMDB0000925	C01104	Trimethyloxamine	0.359598	0.536797	0.690243
HMDB0000258	C00089	Sucrose	0.338132	0.536797	0.690243
HMDB0003553	C01613	Stachyose	6.02163	0.536797	0.690243
HMDB0001257	C00315	Spermidine	1.40534	0.536797	0.690243
NA	NA	Quinelorane Dihydrochloride	0.690944	0.536797	0.690243
HMDB0011177	NA	Phe-Pro	1.68611	0.536797	0.690243
NA	NA	PFSA-Cl	1.08487	0.536797	0.690243
HMDB0240784	NA	O-Propanoyl-D-Carnitine	1.20419	0.536797	0.690243
HMDB0005765	C21016	Ophthalmic Acid	0.462012	0.536797	0.690243
HMDB0031031	NA	O-Dodecylbenzenesulfonic Acid	0.717313	0.536797	0.690243
HMDB0240655	NA	O-Cresol Sulfate	0.511129	0.536797	0.690243
HMDB0240777	NA	O-(17-Carboxyheptadecanoyl)Carnitine	1.04561	0.536797	0.690243
HMDB0062181	NA	N-Lactoylvaline	1.72176	0.536797	0.690243
HMDB0062178	NA	N-Lactoyl-Tryptophan	1.29752	0.536797	0.690243
HMDB0255504	D08258	Nefopam	1.08378	0.536797	0.690243
HMDB0013253	C05135	N-Acetylhistamine	1.76962	0.536797	0.690243
HMDB0041943	C12271	N-Acetyldopamine	0.93744	0.536797	0.690243
HMDB0000812	C01042	N-Acetylaspartic Acid	1.17312	0.536797	0.690243
HMDB0040646	NA	Myrsinone	0.905685	0.536797	0.690243
NA	NA	Methyl 2-Ethyl-4-[(3R,4R,5S)-5-Hydroxy-4,5-Dimethyl-2-Oxooxolan-3-Yl-2-Methyl-3-Oxobutanoate	0.781032	0.536797	0.690243
HMDB0041922	C08737	Melamine	0.718639	0.536797	0.690243
HMDB0000133	C00387	Guanosine	0.601374	0.536797	0.690243
NA	NA	Graveolide	1.87893	0.536797	0.690243
HMDB0000086	C00670	Glycerol-3-Phosphocholine	2.73878	0.536797	0.690243
HMDB0000148	C00025	Glutamic Acid	1.52599	0.536797	0.690243
HMDB0035749	C08944	Ginsenoside Re	1.31438	0.536797	0.690243
HMDB0005807	C01424	Gallic Acid	0.181784	0.536797	0.690243
HMDB0030604	C10289	Epsilon-Viniferin	0.367427	0.536797	0.690243
HMDB0006548	C10858	Ecgonine	1.04594	0.536797	0.690243
HMDB0004814	NA	Dipropyl Ketone	0.900576	0.536797	0.690243
HMDB0001409	C00365	Deoxyuridine Monophosphate	1.73892	0.536797	0.690243
NA	NA	Cyclododecalactam	1.57523	0.536797	0.690243
HMDB0000562	C00791	Creatinine	2.01013	0.536797	0.690243
HMDB0015373	D03472	Chloroxine	1.67202	0.536797	0.690243
HMDB0249241	NA	Bistris	1.48714	0.536797	0.690243
HMDB0249276	C14350	Bisphenol AF	0.369168	0.536797	0.690243
NA	NA	Benzoylcholine	1.07592	0.536797	0.690243
HMDB0001870	C00180	Benzoic Acid	1.20831	0.536797	0.690243
HMDB0249891	NA	Antcin K	0.545539	0.536797	0.690243
HMDB0000072	C00417	Aconitic Acid	2.04215	0.536797	0.690243
HMDB0247607	C19670	9-Octadecenamide	0.717323	0.536797	0.690243
HMDB0035918	NA	7(14)-Bisabolene-2,3,10,11-Tetrol	0.714547	0.536797	0.690243
NA	NA	6-O-(4-Hydroxycinnamoyl)-Beta-D-Glucopyranose 1,2-Bis(3,4,5-Trihydroxybenzoate)	0.191373	0.536797	0.690243
HMDB0038692	NA	6-Methyl-2-Methylene-6-Octene-1,3,8-Triol	0.371568	0.536797	0.690243
HMDB0259359	NA	6,7-Dimethoxy-3-Phenylquinoxaline	2.5432	0.536797	0.690243
NA	NA	6-(Diaminomethylideneamino)-2-[[(4E,6E,12E,14E)-3-Hydroxy-2-(Hydroxymethyl)-8,10,16-Trimethyloctadeca-4,6,12,14-TetraenoylAminoHexanoic Acid	1.52984	0.536797	0.690243
NA	NA	5-Hydroxymethylcytidine	0.647267	0.536797	0.690243
HMDB0029709	NA	5,6,7,8-Tetrahydro-4-Methylquinoline	0.951128	0.536797	0.690243
HMDB0029646	C10680	4-O-Methylphloroacetophenone	0.911629	0.536797	0.690243
HMDB0060768	NA	4-Hydroxymethylpyrazole	1.54038	0.536797	0.690243
HMDB0000500	C00156	4-Hydroxybenzoate	1.06604	0.536797	0.690243
HMDB0112086	NA	3-Methyl-5-Pentyl-2-Furanpentanoic Acid	1.45897	0.536797	0.690243
HMDB0040756	NA	3-Hydroxy-6,8-Dimethoxy-7(11)-Eremophilen-12,8-Olide	0.939411	0.536797	0.690243
NA	NA	3-Hydroxy-4-(Succin-2-Yl)-Caryolane Delta-Lactone	1.5248	0.536797	0.690243
HMDB0240587	C06193	3-GMP	0.262822	0.536797	0.690243
HMDB0256256	NA	3,6,9,12-Tetraoxatetradecane-1,14-Diol	0.870262	0.536797	0.690243
NA	NA	3,3,3-Trifluoro-1-Propanol	1.083	0.536797	0.690243
NA	NA	3-(Dodecanoylamino)Propyl(Carboxymethyl)Dimethylammonium	1.45855	0.536797	0.690243
HMDB0254881	NA	2-Hydroxy-3-Morpholinopropanesulfonic Acid	4.18055	0.536797	0.690243
NA	NA	20Beta-Hydroxyecdysone	2.60827	0.536797	0.690243
NA	NA	2,2,4,4,6,6-Hexamethoxy-1,1-Biphenyl	1.51769	0.536797	0.690243
NA	NA	2-(Methylethylidene)Butanedioic Acid	1.40801	0.536797	0.690243
HMDB0014607	NA	1-Tetradecanol Hydrogen Sulfate	0.94893	0.536797	0.690243
HMDB0031702	NA	1-Piperidinecarboxaldehyde	1.15983	0.536797	0.690243
HMDB0011130	C21484	1-Octadecanoyl-Sn-Glycero-3-Phosphoethanolamine	0.67563	0.536797	0.690243
NA	NA	1,4-Cyclohexanedicarboxylic Acid	0.883064	0.536797	0.690243
HMDB0002123	C16361	1,3,7-Trimethyluric Acid	1.01451	0.536797	0.690243
NA	NA	1,3,7-Trimethyl-9-Hydroxy-9H-Purine-2,6,8(1H,3H,7H)-Trione	0.564371	0.536797	0.690243
NA	NA	(Z)-9,12,13-Trihydroxyoctadec-15-Enoic Acid	2.10423	0.536797	0.690243
NA	NA	(5R)-5-Hydroxy-1-(4-Hydroxy-3-Methoxyphenyl)Decan-3-One	1.72636	0.536797	0.690243
NA	NA	(4S,5Z,6S)-4-(2-Methoxy-2-Oxoethyl)-5-[2-[(E)-3-Phenylprop-2-EnoylOxyethylidene-6-[(2S,3R,4S,5S,6R)-3,4,5-Trihydroxy-6-(Hydroxymethyl)Oxan-2-YlOxy-4H-Pyran-3-Carboxylic Acid	0.317875	0.536797	0.690243
HMDB0242328	NA	(1R,3R)-1-Aminocyclopentane-1,3-Dicarboxylic Acid	0.599857	0.536797	0.690243
HMDB0035141	NA	Oseltamivir Acid	0	0.632142	0.787365
HMDB0001554	C00655	Xanthylic Acid	0.318668	0.647329	0.787365
HMDB0001491	C00018	Pyridoxal Phosphate	4.22705	0.647329	0.787365
HMDB0248216	NA	Beta-Gentiobiose	2.94182	0.647329	0.787365
NA	NA	1-Allyl-2-Hydroxy-7,8,9,10-Tetrahydroazepino[2,1-BQuinazolin-12(6H)-One	1.75329	0.647329	0.787365
NA	NA	1-{2-[(2-Chlorophenyl)Methyl(1,2,3,4-Tetrahydrobeta-Carbolinyl)}-4-Methoxyben Zene	8.07673	0.647329	0.787365
HMDB0000888	NA	Undecanedioic Acid	0.96614	0.662338	0.787365
HMDB0001965	C14811	Troxilin B3	1.2107	0.662338	0.787365
NA	NA	Trifluoromethanesulfonic Acid	0.879933	0.662338	0.787365
HMDB0251530	C00725	Thioctic Acid	0.851574	0.662338	0.787365
HMDB0000252	C00319	Sphingosine	0.74371	0.662338	0.787365
NA	NA	Smenospongine	0.137328	0.662338	0.787365
NA	D00154	Santonin	2.57269	0.662338	0.787365
NA	C06338	Quinolinol	0.445208	0.662338	0.787365
NA	NA	Psicose	1.49796	0.662338	0.787365
NA	C18885	Propamocarb	0.925787	0.662338	0.787365
HMDB0000482	C06423	Octanoic Acid	0.858242	0.662338	0.787365
HMDB0034737	NA	Notoginsenoside Fe	1.35309	0.662338	0.787365
HMDB0013267	NA	N-Decanoylglycine	1.00902	0.662338	0.787365
HMDB0243607	NA	N-(3-Hydroxybutanoyl)Homoserine Lactone	0.879484	0.662338	0.787365
NA	NA	Methylethyl 6-(3-Bromo-4-Hydroxy-5-Methoxyphenyl)-3-Ethyl-4-Methyl-2-Oxo-1,3,6 -Trihydropyrimidine-5-Carboxylate	0.184172	0.662338	0.787365
HMDB0029750	NA	Methyl 2-Furoate	0.896595	0.662338	0.787365
NA	NA	Macrosphelide D	0.95684	0.662338	0.787365
HMDB0033319	C10650	Licarin A	0.864347	0.662338	0.787365
NA	NA	Lauryldiethanolamine	1.74187	0.662338	0.787365
HMDB0000168	C00152	L-Asparagine	1.22329	0.662338	0.787365
HMDB0000193	C00311	Isocitric Acid	0.603915	0.662338	0.787365
HMDB0000197	C00954	Indole-3-Acetic Acid	1.37582	0.662338	0.787365
HMDB0253423	NA	Imidazooxazole	0.720068	0.662338	0.787365
HMDB0004363	C06195	Imidazolone	0.855439	0.662338	0.787365
HMDB0003905	C05130	Imidazole-4-Acetaldehyde	1.07604	0.662338	0.787365
HMDB0001397	C00144	GMP	1.22983	0.662338	0.787365
HMDB0000625	C00257	Gluconic Acid	0.171857	0.662338	0.787365
NA	NA	Ethyl 2-{3-Methyl-7-[(3-Methylphenyl)Methyl-2,6-Dioxo-1,3,7-Trihydropurin-8-Y Lthio}Acetate	0.195809	0.662338	0.787365
HMDB0000145	C00468	Estrone	1.6532	0.662338	0.787365
HMDB0000068	C00788	Epinephrine	1.19083	0.662338	0.787365
HMDB0000623	C02678	Dodecanedioic acid	0.953786	0.662338	0.787365
HMDB0245221	C18653	DNOC	0.288915	0.662338	0.787365
HMDB0250930	C10935	Diethyltoluamide	0.874363	0.662338	0.787365
HMDB0002545	C00333	D-Galacturonic Acid	0.263987	0.662338	0.787365
NA	NA	Dereplicator Identification - Heptaibin	1.71694	0.662338	0.787365
HMDB0001016	C03492	D-4-Phosphopantothenate	0.232647	0.662338	0.787365
HMDB0014447	C12535	Cyclohexanecarboxylic Acid, 4-(Aminomethyl)-	0.700072	0.662338	0.787365
HMDB0031342	C09822	Cyclohexanecarboxylic Acid	0.880291	0.662338	0.787365
NA	C18573	Cyazofamid	3.09487	0.662338	0.787365
HMDB0000094	C00158	Citric Acid	0.394885	0.662338	0.787365
HMDB0000067	C00187	Cholesterol	0.282848	0.662338	0.787365
NA	C18817	Chlorotoluron	1.32062	0.662338	0.787365
HMDB0029415	C03727	Carbocysteine	4.98885	0.662338	0.787365
NA	NA	Capric Dimethyl Amine Oxide	1.59696	0.662338	0.787365
HMDB0000784	C08261	Azelaic Acid	0.925789	0.662338	0.787365
HMDB0000045	C00020	Amp	2.56556	0.662338	0.787365
NA	NA	Alpha-Maltotriose	2.76014	0.662338	0.787365
HMDB0000019	C00141	Alpha-Ketoisovalerate	1.38182	0.662338	0.787365
HMDB0001151	C01487	Allose	0.812338	0.662338	0.787365
NA	NA	Aeruginosamide B	0.687017	0.662338	0.787365
NA	NA	8-Bromo-6-Chloro-3-(4-Hydroxyphenyl)-4-Methylchromen-2-One	0.85282	0.662338	0.787365
NA	NA	6-Chloro-2-(Trichloromethyl)Chromen-4-One	1.04006	0.662338	0.787365
HMDB0001232	C00870	4-Nitrophenol	1.06404	0.662338	0.787365
HMDB0061189	NA	3-Hydroxyisovalerylcarnitine	1.15174	0.662338	0.787365
NA	NA	3-Hydroxy-4-Methoxy-2,3-Dihydropyran-6-One	1.20461	0.662338	0.787365
HMDB0032994	NA	3-Hydroxy-2H-Pyran-2-One	0.918521	0.662338	0.787365
HMDB0034889	NA	3Alpha,4,7,7Alpha-Tetrahydro-4-Hydroxy-1H-Isoindole-1,3(2H)-Dione	1.17448	0.662338	0.787365
HMDB0244908	NA	3,5-Dihydroxyphenylglycine	1.18842	0.662338	0.787365
HMDB0246022	NA	3,4-Diaminopyridine	3.1039	0.662338	0.787365
HMDB0240328	NA	2-O-Methyluridine	0.408347	0.662338	0.787365
HMDB0061888	C14447	2-Methylpyridine	0.721443	0.662338	0.787365
HMDB0031057	NA	2-Hydroxyhexadecanoic Acid	0.706349	0.662338	0.787365
HMDB0245114	NA	2-Ethyl-3-Hydroxy-2,4,4-Trimethyloxazolidine	2.62951	0.662338	0.787365
HMDB0245496	NA	2,5-Dihydro-1H-Pyrrole-2-Carboxylic Acid	0.973243	0.662338	0.787365
HMDB0011729	C03661	1-Kestose	1.88712	0.662338	0.787365
HMDB0240628	NA	1-Carboxyethylphenylalanine	1.39808	0.662338	0.787365
HMDB0004668	C14765	13-OxoODE	1.44914	0.662338	0.787365
HMDB0244510	NA	13-Hydroxyoctadeca-9,12-Dienoic Acid	0.262883	0.662338	0.787365
HMDB0251502	NA	1,3,5-Hexatriene	0.947501	0.662338	0.787365
HMDB0254327	C08236	1,3,4,5,6,7-Hexahydroxyheptan-2-One	0.459059	0.662338	0.787365
HMDB0002815	C03916	1-(9Z-Octadecenoyl)-Sn-Glycero-3-Phosphocholine	1.09536	0.662338	0.787365
NA	NA	1-(2-Hydroxyethyl)-2,2,6,6-Tetramethyl-4-Hydroxypiperidine	1.03215	0.662338	0.787365
NA	NA	{6-[(2S)-5-Acetyloxy-2-(4-Acetyloxyphenyl)-4-Oxochroman-7-Yloxy-3,4,5-Triacet Yloxy-2H-3,4,5,6-Tetrahydropyran-2-Yl}Methyl (2E)-3-(4-Acetyloxyphenyl)Prop-2- Enoate	1.63664	0.662338	0.787365
HMDB0062585	C04281	(3R,5S)-1-Pyrroline-3-Hydroxy-5-Carboxylic Acid	0.999712	0.662338	0.787365
NA	NA	(2R)-2-[(2R,5S)-5-[(2S)-2-HydroxybutylOxolan-2-YlPropanoic Acid	2.94099	0.662338	0.787365
NA	NA	(+)-Aerugine	1.87047	0.662338	0.787365
HMDB0253179	C05010	Histidiylleucine	3.46332	0.714379	0.848449
NA	NA	Ethyl 3-{N-[2-(N-Phenylcarbamoyl)PhenylCarbamoyl}Propanoate	2.10616	0.783711	0.878643
NA	NA	1-[4-(3,4-Dichlorophenyl)-6-(Trifluoromethyl)Pyrimidin-2-YlPyrrolidine-2-Carb Oxylic Acid	1.50659	0.783711	0.878643
HMDB0013122	C04230	(2-{[(2R)-2-Hydroxy-3-[(1Z)-Octadec-1-En-1-YloxyPropyl PhosphonatoOxy}Ethyl)Trimethylazanium	0.455649	0.783711	0.878643
HMDB0000098	C01394	Xylose	0.363709	0.792208	0.878643
HMDB0259784	C08252	Verbascose	0.916135	0.792208	0.878643
HMDB0013312	NA	Trans-3-Octenedioic Acid	0.891891	0.792208	0.878643
HMDB0258632	C12043	Surfactin	0.925672	0.792208	0.878643
HMDB0061717	NA	Succinylcarnitine	0.668841	0.792208	0.878643
HMDB0003219	C02076	Sedoheptulose	0.69296	0.792208	0.878643
HMDB0029723	C12283	Saccharin	0.340802	0.792208	0.878643
HMDB0003213	C00492	Raffinose	2.06584	0.792208	0.878643
HMDB0014483	C01956	Pyrazinamide	0.212356	0.792208	0.878643
HMDB0000767	C02067	Pseudouridine	0.362416	0.792208	0.878643
HMDB0001943	C02765	Pseudoephedrine	1.4281	0.792208	0.878643
HMDB0014888	C07531	Prilocaine	0.823125	0.792208	0.878643
HMDB0030124	C01390	Prenol	1.38797	0.792208	0.878643
HMDB0033251	NA	Phenylmethyl Benzeneacetate	0.387371	0.792208	0.878643
NA	NA	PC(17:0/18:2(4Z,7Z))	0.986936	0.792208	0.878643
HMDB0256083	C01742	Palatinose	3.89347	0.792208	0.878643
HMDB0000912	NA	N6-Succinyladenosine	0.858491	0.792208	0.878643
HMDB0001539	C03626	N,N-Dimethylarginine	1.08955	0.792208	0.878643
HMDB0244280	NA	N(4)-Acetylsulfamethazine	0.649195	0.792208	0.878643
HMDB0031232	NA	Monoethyl Carbonate	0.975319	0.792208	0.878643
NA	NA	Methyl 4,5,6-Trihydroxy-3-(3-Methoxy-3-Oxoprop-1-En-2-Yl)Oxycyclohexene-1-Carboxylate	0.969376	0.792208	0.878643
HMDB0000156	C00149	Malic Acid	1.04148	0.792208	0.878643
HMDB0010385	C04230	LPC(18:1)	1.36046	0.792208	0.878643
HMDB0014426	C07073	Lidocaine	0.00697471	0.792208	0.878643
HMDB0003466	C01040	L-Gulonolactone	1.10545	0.792208	0.878643
HMDB0059837	NA	Indane	0.931828	0.792208	0.878643
NA	NA	Homopterocarpin	0.790741	0.792208	0.878643
HMDB0061822	NA	Hexaethylene Glycol	1.03255	0.792208	0.878643
HMDB0029838	C06537	Harmalol	1.19873	0.792208	0.878643
HMDB0000132	C00242	Guanine	2.12416	0.792208	0.878643
HMDB0252911	C17816	Gomisin D	0.963396	0.792208	0.878643
HMDB0062745	C21203	Geranyl Phosphate	1.68048	0.792208	0.878643
HMDB0000645	C00446	Galactose 1-Phosphate	0.0904733	0.792208	0.878643
HMDB0005030	C06999	Fexofenadine	0.8256	0.792208	0.878643
HMDB0094660	C14175	Diethyl Phthalate	0.880944	0.792208	0.878643
HMDB0251214	C14686	Dicyclohexylamine	1.26376	0.792208	0.878643
HMDB0251169	NA	Dibenzylamine	1.11478	0.792208	0.878643
HMDB0246552	C00185	Cellobiose	1.12306	0.792208	0.878643
HMDB0031345	NA	Calystegine A6	1.24611	0.792208	0.878643
HMDB0001252	C00576	Betaine Aldehyde	1.14486	0.792208	0.878643
HMDB0032930	NA	Benzothiazole	1.04965	0.792208	0.878643
NA	NA	Anabasamine	1.06843	0.792208	0.878643
HMDB0014328	C07514	Amphetamine	1.39111	0.792208	0.878643
NA	NA	9-Methoxy-4,4-Dimethyl-13-Phenyl-6,14-Dioxatetracyclo[8.4.0.02,7.03,5Tetradeca-1,7,9-Trien-11-One	0.668851	0.792208	0.878643
HMDB0004708	C14833	9,12,13-Trihome	0.249516	0.792208	0.878643
HMDB0302107	C19620	9,10-Epoxy-18-Hydroxy-Octadecanoic Acid	0.583916	0.792208	0.878643
HMDB0037776	NA	5,9:6,9-Diepoxy-3-Megastigmene	1.04082	0.792208	0.878643
HMDB0246248	NA	5,6-Dihydroxy-2-Methylaminotetralin	0.970691	0.792208	0.878643
HMDB0246511	C19262	4-Methylimidazole	1.20029	0.792208	0.878643
NA	NA	4-Hydroxybenzotriazole	0.958064	0.792208	0.878643
NA	NA	4-(Decan-4-Yl)Benzenesulfonic Acid	0.183247	0.792208	0.878643
HMDB0034259	C05669	3-Nitropropionic Acid	1.0925	0.792208	0.878643
HMDB0061643	NA	3-Carboxy-4-Methyl-5-Pentyl-2-Furanpropanoic Acid	0.0420462	0.792208	0.878643
HMDB0245820	NA	3-Aminopicolinaldehyde	1.11409	0.792208	0.878643
HMDB0252169	NA	3,7,11-Trimethyldodeca-2,6,10-Trienoic Acid	0.0100471	0.792208	0.878643
HMDB0001866	C05580	3,4-Dihydroxymandelic Acid	1.36742	0.792208	0.878643
HMDB0032918	NA	3-(2-Furanyl)-2-Propenal	0.749552	0.792208	0.878643
HMDB0245117	NA	2-Ethylaniline	1.17678	0.792208	0.878643
HMDB0245025	NA	2-Aminopurine	0.820057	0.792208	0.878643
NA	NA	2-{[(4-Methylphenyl)SulfonylAmino}-4-Methylthiobutanoic Acid	1.27214	0.792208	0.878643
NA	NA	2,7-Octadienoic Acid, 6-Hydroxy-2,6-Dimethyl-, (1Ar,1Bs,2S,5As,6R,6As)-2-(Beta-D-Glucopyranosyloxy)-1A,1B,2,5A,6,6A-Hexahydro-5A-Hydroxy-1A-Methyloxireno[4,5Cyclopenta[1,2-CPyran-6-Yl Ester, (2E,6S)-	0.833888	0.792208	0.878643
NA	NA	2,4A,6-Trihydroxy-8-Isopropyl-1,1-Dimethyl-2,3,4,4A,5,10,11,11A-Octahydro-1H-Dibenzo[A,D[7Annulen-7-Yl Beta-D-Glucopyranoside	2.07868	0.792208	0.878643
NA	NA	2,3-Dihydro-1H-Carbazol-4(9H)-One	0.989924	0.792208	0.878643
NA	NA	2,3-Dideoxyuridine	1.2317	0.792208	0.878643
HMDB0032619	C07112	1-Phenylethanol	0.858136	0.792208	0.878643
NA	NA	1,5-Dibutyl-3,6-Dihydro-2H-Pyridine	1.31386	0.792208	0.878643
NA	NA	1,1-Dimethyl-4-Phenylpiperazinium	0.982316	0.792208	0.878643
NA	NA	1-(4-Acetamidobenzene-1-Sulfonyl)Proline	0.794364	0.792208	0.878643
HMDB0030346	C09910	(S)-Actinidine	1.5202	0.792208	0.878643
HMDB0040611	NA	(9R,10S,12Z)-9,10-Dihydroxy-8-Oxo-12-Octadecenoic Acid	0.186093	0.792208	0.878643
NA	NA	(2S,3S,4S,5R,6R)-6-[[(3S,6Ar,6Bs,8As,12As,14Br)-4,4,6A,6B,11,11,14B-Heptamethyl-8A-[(2S,3R,4S,5S,6R)-3,4,5-Trihydroxy-6-(Hydroxymethyl)Oxan-2-YlOxycarbonyl-1,2,3,4A,5,6,7,8,9,10,12,12A,14,14A-Tetradecahydropicen-3-YlOxy-3,5-Dihydroxy-4-[(2S,3R,4R,5R,6S)-3,4,5-Trihydroxy-6-Methyloxan-2-YlOxyoxane-2-Carboxylic Acid	1.32523	0.792208	0.878643
HMDB0011506	NA	(2-Aminoethoxy)[(2R)-2-Hydroxy-3-[(9Z)-Octadec-9-EnoyloxyPropoxyPhosphinic Acid	0.350084	0.792208	0.878643
NA	NA	(11S)-14-Ethyl-12-Ethylidene-8,14-Diazapentacyclo[9.5.2.0<1,9.0<2,7.0<14,17 Octadeca-2,4,6,9-Tetraene-10-Carbaldehyde, Iodide	0.740835	0.792208	0.878643
HMDB0037605	NA	(10Betah,11Xi)-11-Hydroxy-13-Nor-6-Eremophilen-8-One	0.856041	0.792208	0.878643
NA	NA	N-(2,4-Dimethylphenyl)Acetamide	2.80098	0.851762	0.943074
NA	NA	3-(5,9-Dimethyl-4-Oxo-8-Oxatetracyclo[7.2.1.1~7,10~.0~1,6~Tridec-2-En-5-Yl)Propanoic Acid	0	0.851762	0.943074
NA	NA	PFCA-H	1.59225	0.926596	0.96435
HMDB0015159	C20380	Mycophenolic Acid	0.00264821	0.926596	0.96435
HMDB0000098	C00181	Xyloside	0.385924	0.927099	0.96435
NA	NA	Scutellarin	1.92284	0.927099	0.96435
HMDB0039721	C02273	Digalacturonate	0.612026	0.927099	0.96435
NA	NA	(4E)-1,7-Bis(4-Hydroxyphenyl)Hept-4-En-3-One	0.86534	0.927099	0.96435
NA	NA	(2R,4S,5R)-4-[(2S,4S,5R)-4-[(2S,4S,5R)-4-[(2S,4S,5R)-3,5-Dihydroxy-6-(Hydroxymethyl)-4-[(2S,4R,5S)-3,4,5-Trihydroxy-6-(Hydroxymethyl)Oxan-2-YlOxyoxan-2-YlOxy-3,5-Dihydroxy-6-(Hydroxymethyl)Oxan-2-YlOxy-3,5-Dihydroxy-6-(Hydroxymethyl)Oxan-2-YlOxy-6-(Hydroxymethyl)Oxane-2,3,5-Triol	3.58721	0.927099	0.96435
HMDB0013317	NA	Tridecanoylglycine	1.00774	0.930736	0.96435
HMDB0002825	C07480	Theobromine	0.893803	0.930736	0.96435
NA	NA	Sarcinaxanthin Monoglucoside	2.36267	0.930736	0.96435
HMDB0256846	D01380	Propyphenazone	0.875872	0.930736	0.96435
HMDB0033482	NA	Plantagonine	1.32525	0.930736	0.96435
HMDB0001429	C00009	Phosphoric Acid	0.70648	0.930736	0.96435
HMDB0304442	NA	Octadecenedioic Acid	0.225512	0.930736	0.96435
HMDB0062503	C14789	N-Hydroxy-1-Aminonaphthalene	2.44079	0.930736	0.96435
NA	NA	N-Fructosyl Pyroglutamate	0.655323	0.930736	0.96435
NA	NA	N-(2,4-Dimethylphenyl)Formamide	1.19863	0.930736	0.96435
NA	NA	Methyl 7-Deshydroxypyrogallin-4-Carboxylate	0.842556	0.930736	0.96435
HMDB0011730	C08243	Melezitose	1.84117	0.930736	0.96435
HMDB0243621	C10774	Matrine	1.10119	0.930736	0.96435
HMDB0001262	C01835	Maltotriose	0.547663	0.930736	0.96435
HMDB0011111	C00222	Malonic Semialdehyde	0.959557	0.930736	0.96435
HMDB0000175	C00130	IMP	1.88279	0.930736	0.96435
HMDB0000012	C00526	Deoxyuridine	0.869875	0.930736	0.96435
HMDB0000085	C00330	Deoxyguanosine	1.61275	0.930736	0.96435
HMDB0250535	NA	Cresyl Saligenin	1.03994	0.930736	0.96435
NA	NA	Cotoin	0.98666	0.930736	0.96435
HMDB0000957	C00090	Catechol	1.17117	0.930736	0.96435
NA	NA	Abamectin Component B1A	1.05863	0.930736	0.96435
NA	NA	9,13-Epoxy-3,18-Dihydroxy-15,16-Labdanolide	0.607615	0.930736	0.96435
NA	NA	9,12,13-Trihydroxyoctadeca-10,15-Dienoic Acid	0.733816	0.930736	0.96435
NA	NA	8-Methoxycanthin-6-One	1.06924	0.930736	0.96435
HMDB0240687	C01092	8-Amino-7-Oxononanoic Acid	1.2355	0.930736	0.96435
HMDB0248216	C05402	6-O-(Alpha-D-Galactopyranosyl)-D-Glucopyranose	2.42072	0.930736	0.96435
HMDB0246419	NA	4-Ethylaniline	1.76629	0.930736	0.96435
HMDB0000807	C00597	3-Phosphoglyceric Acid	0.241208	0.930736	0.96435
HMDB0258301	C05610	2-Propenal, 3-(4-Hydroxy-3,5-Dimethoxyphenyl)-	1.28655	0.930736	0.96435
NA	NA	2-O-Methylguanosine	0.750857	0.930736	0.96435
HMDB0001873	C02632	2-Methylpropanoic Acid	2.71031	0.930736	0.96435
NA	NA	2-{1-[(4-Chlorophenyl)Carbonyl-5-Methoxy-2-Methylindol-3-Yl}-N-(5-Ethyl(1,3,4 -Thiadiazol-2-Yl))Acetamide	1.89318	0.930736	0.96435
NA	NA	2,4-Di-O-Methylolivetonide	0.369573	0.930736	0.96435
NA	NA	2-(Carbamimidoylsulfanyl)Ethanesulfonic Acid	0.726506	0.930736	0.96435
HMDB0003431	C00860	1H-Imidazole-4-Propanol, Beta-Amino-, (S)-	1.15773	0.930736	0.96435
HMDB0243876	NA	1-Ethylpiperazine	1.62897	0.930736	0.96435
NA	NA	(S)-Curvularin	0.653635	0.930736	0.96435
HMDB0010407	C04230	(2-{[(2R)-3-[(1Z)-Hexadec-1-En-1-Yloxy-2-Hydroxypropyl PhosphonatoOxy}Ethyl)Trimethylazanium	0.200782	0.930736	0.96435
HMDB0000296	C00299	Uridine	0.205837	0.930736	0.96435
HMDB0014118	NA	Trifluoroacetic Acid	1.0041	0.930736	0.96435
HMDB0003252	C05963	Thromboxane B2	0.0438707	0.930736	0.96435
HMDB0000926	C00747	Pyridine	1.51666	0.930736	0.96435
HMDB0245113	C07499	Phenylethylmalonamide	0.644192	0.930736	0.96435
HMDB0041974	C02575	Pentachlorophenol	1.30987	0.930736	0.96435
HMDB0062176	NA	N-Lactoylleucine	0.884035	0.930736	0.96435
HMDB0011756	C02710	N-Acetylleucine	1.05255	0.930736	0.96435
HMDB0011129	NA	LPE(18:0)	1.10019	0.930736	0.96435
HMDB0011473	NA	LPE(16:0)	0.204123	0.930736	0.96435
HMDB0010384	C04230	LPC(18:0)	1.3331	0.930736	0.96435
NA	C08432	Isoguanosine	1.34845	0.930736	0.96435
HMDB0251144	D03771	Diaveridine	1.07598	0.930736	0.96435
HMDB0003407	C00741	Diacetyl	0.776616	0.930736	0.96435
HMDB0031407	C00557	Cyclopentanone	1.12126	0.930736	0.96435
HMDB0038631	C21721	Camalexin	0.389146	0.930736	0.96435
HMDB0037559	NA	Cadabicilone	1.0985	0.930736	0.96435
NA	NA	Benzothiazole-2-Sulfonic Acid	0.612716	0.930736	0.96435
HMDB0034074	NA	5-Oxooctadecanoic Acid	0.637644	0.930736	0.96435
NA	NA	5-Hydroxymethyluridine	0.849524	0.930736	0.96435
HMDB0246643	NA	5,6-Dimethyl-2,3-Pyrazinedicarbonitrile	0.850231	0.930736	0.96435
HMDB0029559	NA	4-Hydroxybenzoylcholine	1.16546	0.930736	0.96435
HMDB0038949	NA	3Beta,6Beta-Dihydroxynortropane	0.595426	0.930736	0.96435
HMDB0245325	NA	2-Vinylpyridine	1.55078	0.930736	0.96435
HMDB0255446	C16202	2-Naphthalenesulfonic Acid	0.758213	0.930736	0.96435
HMDB0000379	NA	2-Methylcitric Acid	0.608148	0.930736	0.96435
HMDB0059594	C19970	2-Hydroxy-Damp	2.25085	0.930736	0.96435
HMDB0245149	NA	2-Hydroxyacetamide	0.910482	0.930736	0.96435
HMDB0031713	NA	2-Hydroxy-4-Imino-2,5-Cyclohexadienone	0.98892	0.930736	0.96435
NA	NA	2,3,4-Tris[[(E)-3-(3,4-Dihydroxyphenyl)Prop-2-EnoylOxy-5-(2-Methylpropanoyloxy)Hexanedioic Acid	0.523756	0.930736	0.96435
NA	NA	2-(2,3-Dimethyl-Phenylamino)-Nicotinic Acid	0.997975	0.930736	0.96435
HMDB0244228	C16538	1,5-Anhydrosorbitol	0.91655	0.930736	0.96435
HMDB0244077	NA	1,2-Dihydroquinoline	1.05314	0.930736	0.96435
NA	NA	(10R,13S)-17-((Z)-5,5-Diphenylpenta-2,4-Dien-2-Yl)-10,13-Dimethyl-2,3,4,7,8,9,10,11,12,13,14,15,16,17-Tetradecahydro-1H-Cyclopenta[APhenanthren-3-Ol	1.9307	0.930736	0.96435
NA	NA	Yohimbinic Acid Monohydrate	1.18512	1	1
NA	NA	Radiclonic Acid	2.35246	1	1
HMDB0042004	C00296	Quinaldine	1.12536	1	1
HMDB0013139	C14519	Pyrenol	1.68574	1	1
HMDB0000267	C01879	Pidolic Acid	0.497786	1	1
HMDB0060015	C00850	Phenylsulfate	0.335354	1	1
HMDB0000209	C07086	Phenylacetic Acid	0.942353	1	1
NA	NA	Phenyl Hexopyranoside	0.176374	1	1
HMDB0011745	C02712	N-Acetylmethionine	2.13826	1	1
HMDB0061384	NA	N-(3-Acetamidopropyl)Pyrrolidin-2-One	0.74859	1	1
NA	NA	N-(2-Ethylphenyl)-2-(9-Methyl-6-Oxohydropurin-8-Ylthio)Acetamide	1.10235	1	1
HMDB0030386	C10160	Myosmine	1.34367	1	1
HMDB0000169	C00159	Mannose	0.321828	1	1
HMDB0011152	NA	LPE(P-16:0)	0.45861	1	1
NA	NA	Lactarorufin B	0.2256	1	1
NA	NA	Isoevernic Acid	0.321595	1	1
HMDB0015163	C07469	Irbesartan	0.979214	1	1
NA	NA	Herbasterol	2.46498	1	1
HMDB0005810	C05631	Eriodictyol	0.939892	1	1
NA	C15742	Cyanopeptolin A	0.222724	1	1
HMDB0000062	C00487	Carnitine	0.902871	1	1
HMDB0247988	D02763	Actodigin	0.487675	1	1
HMDB0010221	NA	9,10-Dihode	1.18012	1	1
HMDB0004710	C14835	9,10,13-Trihome	0.504147	1	1
NA	NA	5,6-Dibenzoyloxy-7-Methyl-1-[3,4,5-Trihydroxy-6-(Hydroxymethyl)Oxan-2-YlOxy-1,4A,5,6,7,7A-Hexahydrocyclopenta[CPyran-4-Carboxylic Acid	3.46475	1	1
HMDB0249518	NA	4-Methylene-2-Octyl-5-Oxotetrahydrofuran-3-Carboxylic Acid	0.815613	1	1
NA	NA	3-O-Acetylpadmatin	0.00508672	1	1
HMDB0060655	C16560	3-Hydroxylidocaine	0.582771	1	1
HMDB0006955	C04604	3-Hydroxy-2-Methylpyridine-4,5-Dicarboxylate	0.388332	1	1
HMDB0061112	NA	3-Carboxy-4-Methyl-5-Propyl-2-Furanpropionic Acid	0.152375	1	1
NA	NA	3-[(4-Hydroxyphenyl)Methyl-2,3,6,7,8,8A-Hexahydropyrrolo[1,2-APyrazine-1,4-Dione	1.40781	1	1
HMDB0059729	NA	3,4-Methylenesebacic Acid	0.524584	1	1
NA	NA	3,3,4,4,5,5,6,6,7,7,8,8,9,9,9-Pentadecafluorononan-1-Ol	1.00101	1	1
HMDB0000362	NA	2-Phosphoglycerate	0.0432842	1	1
HMDB0001172	C00349	2-Methyl-3-Oxopropanoic Acid	0.804802	1	1
HMDB0059758	C02488	2-Hydroxy-2-Ethylsuccinic Acid	0.661501	1	1
HMDB0001031	C00673	2-Deoxy-D-Ribose 5-Phosphate	0.31126	1	1
NA	NA	2,3,3,4,4,4-Hexafluorobutanoic Acid	0.427637	1	1
HMDB0011691	C00127	2,3 Cyclic-Cmp	2.41713	1	1
HMDB0247583	NA	2-(6-Aminopurin-9-Yl)-5-(Hydroxymethyl)Oxolane-3,4-Diol	1.44645	1	1
HMDB0007973	C00157	1-Palmitoyl-2-Linoleoyl-Sn-Glycero-3-Phosphocholine	1.83784	1	1
HMDB0243890	C13903	1-O-Hexadecyl-Sn-Glycero-3-Phosphocholine	0.798533	1	1
HMDB0011503	NA	(2-Aminoethoxy)[(2R)-3-(Hexadecanoyloxy)-2-HydroxypropoxyPhosphinic Acid	0.823242	1	1
HMDB0010379	C04230	(2-{[(2R)-2-Hydroxy-3-(Tetradecanoyloxy)Propyl PhosphonatoOxy}Ethyl)Trimethylazanium	1.40795	1	1
NA	NA	(1S,4S,8R,14S)-11-Ethyl-12-Oxo-7,9,13-Trioxatetracyclo[6.5.1.0(1),(1).0,(1)Tetradeca-2,5-Diene-5-Carboxylic Acid	1.23429	1	1

## Sheet: NTM Vs TB
Supplementary Table7 | Lung Metabolite Changes in NTM/TB and Control Groups
HMDBID	KEGGID	Name	FC	Pvalue	FDR
HMDB0029001	NA	Phe-Met	Inf	3.78006e-05	0.0138781
NA	NA	(S)-Methyl 2-(3-(6,7-Dimethoxy-4-Oxoquinazolin-3(4H)-Yl)Propanamido)-3-Methylbutanoate	Inf	3.78006e-05	0.0138781
HMDB0000929	C00078	Tryptophan	28.2009	0.000171999	0.0138781
HMDB0256846	D01380	Propyphenazone	0.0963817	0.000171999	0.0138781
HMDB0007949	C00157	PC(15:0/20:4(5Z,8Z,11Z,14Z))	0.0272885	0.000171999	0.0138781
NA	NA	N-(3-Cyanophenyl)-2-(4-Hydroxyquinazolin-2-Ylthio)Acetamide	0.153285	0.000171999	0.0138781
NA	NA	N-(2,4-Dimethylphenyl)Acetamide	0.106965	0.000171999	0.0138781
HMDB0253658	NA	Lysergol	0.245	0.000171999	0.0138781
HMDB0033319	C10650	Licarin A	0.05543	0.000171999	0.0138781
HMDB0000684	C00328	Kynurenine	2.46052	0.000171999	0.0138781
HMDB0029838	C06537	Harmalol	0.18654	0.000171999	0.0138781
HMDB0249565	NA	Calycin	0.23412	0.000171999	0.0138781
HMDB0259359	NA	6,7-Dimethoxy-3-Phenylquinoxaline	0.230253	0.000171999	0.0138781
HMDB0029709	NA	5,6,7,8-Tetrahydro-4-Methylquinoline	0.109137	0.000171999	0.0138781
HMDB0246022	NA	3,4-Diaminopyridine	0.260702	0.000171999	0.0138781
NA	NA	1,1-Dimethyl-4-Phenylpiperazinium	0.0856321	0.000171999	0.0138781
HMDB0244121	NA	Tetrahydropyridine	1.91742	0.000343997	0.0201864
HMDB0015095	C07445	Pindolol	0.323803	0.000343997	0.0201864
HMDB0253179	C05010	Histidiylleucine	0.0361573	0.000343997	0.0201864
HMDB0000085	C00330	Deoxyguanosine	0.218419	0.000343997	0.0201864
NA	NA	2-(2,3-Dimethyl-Phenylamino)-Nicotinic Acid	0.151496	0.000343997	0.0201864
HMDB0244077	NA	1,2-Dihydroquinoline	0.306831	0.000343997	0.0201864
NA	NA	O-Trimethoxy-3,4,5-Benzoyl-Oh-Vincamajine	Inf	0.000408161	0.0219557
NA	NA	Fumonisin Py2	Inf	0.000408161	0.0219557
HMDB0029072	NA	Threonyltryptophan	Inf	0.000508137	0.0262402
HMDB0033251	NA	Phenylmethyl Benzeneacetate	0.0362729	0.000687994	0.0277563
HMDB0243621	C10774	Matrine	0.331566	0.000687994	0.0277563
NA	NA	Lactarorufin B	0.0372666	0.000687994	0.0277563
HMDB0003337	C00127	Glutathione (Oxidized)	0.0143471	0.000687994	0.0277563
HMDB0001263	C04076	Allysine	3.6089	0.000687994	0.0277563
HMDB0245117	NA	2-Ethylaniline	0.262707	0.000687994	0.0277563
HMDB0245114	NA	2-Ethyl-3-Hydroxy-2,4,4-Trimethyloxazolidine	15.6585	0.000687994	0.0277563
HMDB0244280	NA	N(4)-Acetylsulfamethazine	Inf	0.000753149	0.0277804
HMDB0028911	NA	Isoleucylleucine	Inf	0.000753149	0.0277804
NA	C10034	Cupressuflavone	Inf	0.000753149	0.0277804
HMDB0038341	NA	Glucosylisomaltol	Inf	0.00116894	0.037911
HMDB0000290	C00043	UDP-Glcnac	4.02757	0.00120399	0.037911
HMDB0061006	NA	Norfentanyl	0.230691	0.00120399	0.037911
HMDB0015159	C20380	Mycophenolic Acid	0.000705069	0.00120399	0.037911
HMDB0000197	C00954	Indole-3-Acetic Acid	0.344287	0.00120399	0.037911
NA	NA	(6-Bromo-2-Oxochromen-3-Yl)-N-[(2-Iodophenyl)CarbonylaminoCarboxamide	0.692536	0.00120399	0.037911
NA	NA	N-[3,5-Bis(Trifluoromethyl)Phenyl-2-(2-1,2,3,4-Tetrahydroisoquinolyl)Acetamid E	Inf	0.00167058	0.0467474
NA	NA	(1R,4S,7S,8S,9R,12E,20R,21R,22S,23S)-7,8,21,22,23-Pentahydroxy-12,16-Dimethyl-3,5,10,19,24-Pentaoxatricyclo[18.3.1.04,9Tetracos-12-En-11-One	Inf	0.00167058	0.0467474
NA	NA	3-(5,9-Dimethyl-4-Oxo-8-Oxatetracyclo[7.2.1.1~7,10~.0~1,6~Tridec-2-En-5-Yl)Propanoic Acid	0	0.00189027	0.0467474
NA	C16316	13(S)-hot	5.66964	0.00191661	0.0467474
HMDB0000258	C00089	Sucrose	91.5018	0.00203102	0.0467474
NA	NA	2-[3-Oxo-2-[5-[3,4,5-Trihydroxy-6-(Hydroxymethyl)Oxan-2-YlOxypent-2-EnylCyclopentylAcetic Acid	Inf	0.00204847	0.0467474
NA	NA	PC(17:0/18:2(4Z,7Z))	3.23516	0.00206398	0.0467474
HMDB0253233	C09866	Huperzine B	0.0985408	0.00206398	0.0467474
HMDB0252911	C17816	Gomisin D	1.87342	0.00206398	0.0467474
HMDB0028831	NA	Glutamyltyrosine	10.2921	0.00206398	0.0467474
HMDB0062745	C21203	Geranyl Phosphate	0.211516	0.00206398	0.0467474
HMDB0001250	C07565	Acetanilide	0.326367	0.00206398	0.0467474
HMDB0060412	C16614	6-Methylthiopurine	2.41201	0.00206398	0.0467474
HMDB0060655	C16560	3-Hydroxylidocaine	0.131257	0.00206398	0.0467474
HMDB0247583	NA	2-(6-Aminopurin-9-Yl)-5-(Hydroxymethyl)Oxolane-3,4-Diol	0.108485	0.00206398	0.0467474
HMDB0243876	NA	1-Ethylpiperazine	0.393871	0.00206398	0.0467474
HMDB0041993	NA	Pivaloylcarnitine	105.713	0.00224164	0.0498959
NA	NA	[(2R,3R,4S,5S,6R)-3-Acetyloxy-2-(Acetyloxymethyl)-5-Hexanoyloxy-6-[(2S,3R)-2,3,4-TrihydroxybutoxyOxan-4-Yl 14-Hydroxytetradecanoate	Inf	0.0022994	0.050314
HMDB0001227	C00364	dTMP	17.3568	0.00250945	0.053995
HMDB0035141	NA	Oseltamivir Acid	0	0.00257651	0.0545291
HMDB0002927	C09789	Naringin	0	0.00261956	0.0545459
NA	NA	2-(Benzimidazol-2-Ylmethylthio)-5,6-Dimethoxybenzimidazole	Inf	0.00280978	0.0554005
NA	NA	1-{2-[(2-Chlorophenyl)Methyl(1,2,3,4-Tetrahydrobeta-Carbolinyl)}-4-Methoxyben Zene	Inf	0.00280978	0.0554005
NA	NA	Methyl 2-Ethyl-4-[(3R,4R,5S)-5-Hydroxy-4,5-Dimethyl-2-Oxooxolan-3-Yl-2-Methyl-3-Oxobutanoate	11.3767	0.00305489	0.0554005
NA	NA	Ethyl 2-{3-Methyl-7-[(3-Methylphenyl)Methyl-2,6-Dioxo-1,3,7-Trihydropurin-8-Y Lthio}Acetate	34.0543	0.00305489	0.0554005
NA	NA	2-[6-Hydroxy-2-(3,4,5-Trimethoxyphenyl)-3-Azabicyclo[4.4.0Dec-3-Yl-N-(4-Meth Oxyphenyl)Acetamide	Inf	0.00314457	0.0554005
HMDB0000574	C00097	Cysteine	8.12984	0.0032583	0.0554005
NA	NA	(S)-Curvularin	10.5287	0.0032583	0.0554005
HMDB0062503	C14789	N-Hydroxy-1-Aminonaphthalene	0.42741	0.00326797	0.0554005
HMDB0011745	C02712	N-Acetylmethionine	0.152712	0.00326797	0.0554005
HMDB0033923	C16434	L-Isoleucinel-Isoleucine	0.549796	0.00326797	0.0554005
HMDB0000195	C00294	Inosine	0.39554	0.00326797	0.0554005
HMDB0000609	C00355	DOPA	3.27509	0.00326797	0.0554005
NA	NA	Beta-D-Glucopyranoside, 4-Hydroxy-3-(3-Methyl-2-Buten-1-Yl)Phenyl 6-O-[(2R,3R,4R)-Tetrahydro-3,4-Dihydroxy-4-(Hydroxymethyl)-2-Furanyl-	2.10455	0.00326797	0.0554005
NA	NA	6-Ethoxy-4-Hydroxy-3-Benzylhydroquinolin-2-One	4.93946	0.00326797	0.0554005
NA	NA	2-(2,4-Difluorophenoxy)-N-{2-[2-Methyl-5-(Phenylmethoxy)Indol-3-YlEthyl}Aceta Mide	Inf	0.00331216	0.0554005
NA	NA	N-(3-Methylthiophenyl)-2-[2-Oxo-4-(Pyrrolidinylcarbonyl)HydroquinolylAcetamid E	Inf	0.0033472	0.0554005
HMDB0246552	C00185	Cellobiose	159.2	0.00378228	0.0610366
NA	NA	Butyl 4-[(3,4-Dimethoxyphenyl)CarbonylaminoBenzoate	63.3259	0.00378228	0.0610366
HMDB0259989	NA	Zardaverine	Inf	0.00388489	0.0613282
NA	NA	Peucenin	61.977	0.00412915	0.0613282
NA	NA	7-Hydroxy-1-({2-O-[(2E,6E)-8-Hydroxy-2,6-Dimethyl-2,6-Octadienoyl-Beta-D-Glucopyranosyl}Oxy)-7-Methyl-1,4A,5,6,7,7A-Hexahydrocyclopenta[CPyran-4-Carboxylic Acid	Inf	0.00432909	0.0613282
NA	NA	2-Phenylethyl 4-(3-Ethoxy-4-Hydroxyphenyl)-7-(4-Methoxyphenyl)-2-Methyl-5-Oxo- 1,4,6,7,8-Pentahydroquinoline-3-Carboxylate	Inf	0.00432909	0.0613282
HMDB0013253	C05135	N-Acetylhistamine	9.77317	0.00438773	0.0613282
NA	NA	2,4-Di-O-Methylolivetonide	17.6789	0.00456512	0.0613282
NA	NA	Smenospongine	Inf	0.00458792	0.0613282
HMDB0061822	NA	Hexaethylene Glycol	Inf	0.00459525	0.0613282
HMDB0015465	D01366	Bezafibrate	Inf	0.00459525	0.0613282
HMDB0040930	NA	1,5-Bis(4-Hydroxy-3-Methoxyphenyl)-1,4-Pentadien-3-One	Inf	0.00459525	0.0613282
HMDB0028888	NA	Histidylisoleucine	6.49535	0.0047282	0.0613282
HMDB0000158	C00082	Tyrosine	4.36728	0.00498796	0.0613282
HMDB0000273	C00214	Thymidine	5.81861	0.00498796	0.0613282
HMDB0029835	NA	Tetrahydroharmol	0.161563	0.00498796	0.0613282
NA	C01410	Tert-Butoxycarbonylasparagine	17.4315	0.00498796	0.0613282
HMDB0000251	C00245	Taurine	2.80308	0.00498796	0.0613282
NA	NA	Pyroglutamylisoleucine	10.2742	0.00498796	0.0613282
HMDB0011177	NA	Phe-Pro	0.29452	0.00498796	0.0613282
NA	NA	N-(2,4-Dimethylphenyl)Formamide	0.226373	0.00498796	0.0613282
HMDB0003423	C00303	Glutamine	7.35895	0.00498796	0.0613282
HMDB0013773	C01570	D-Leucine	5.23208	0.00498796	0.0613282
HMDB0000012	C00526	Deoxyuridine	3.69957	0.00498796	0.0613282
HMDB0000043	C00719	Betaine	2.509	0.00498796	0.0613282
HMDB0245325	NA	2-Vinylpyridine	0.376839	0.00498796	0.0613282
HMDB0003771	NA	2-Methylacetoacetic Acid	3.4407	0.00498796	0.0613282
NA	NA	Sayaendoside	61.348	0.00509717	0.0614995
HMDB0256790	C10986	Procymidone	23.2638	0.00509717	0.0614995
NA	NA	2-Furanacetic Acid, Tetrahydro-Alpha-Methyl-5-(2-Oxopropyl)-, 2,3-Dihydroxypropyl Ester	Inf	0.00527922	0.0631062
HMDB0006555	C06196	Deoxyinosine Monophosphate	21.0986	0.00553571	0.0649691
HMDB0000071	C05512	Deoxyinosine	64.9499	0.00553571	0.0649691
NA	NA	Tert-Butyl 1-(2-Furylmethyl)-5-Hydroxy-2-Methylbenzo[GIndole-3-Carboxylate	Inf	0.00590482	0.0670943
NA	NA	Isofraxoside	Inf	0.00590482	0.0670943
HMDB0303758	NA	Icariside D1	Inf	0.00590482	0.0670943
NA	NA	(2R,3R,4S,5S,6R)-2-Octoxy-6-[[(2S,3R,4S,5R)-3,4,5-Trihydroxyoxan-2-YlOxymethylOxane-3,4,5-Triol	15.3152	0.00608385	0.0670943
NA	NA	LPS(19:0)	Inf	0.0061155	0.0670943
NA	NA	Beta-D-Glucopyranose, 6-O-Beta-D-Glucopyranosyl-1-O-[(2,6,6-Trimethyl-1-Cyclohexen-1-Yl)Carbonyl-	Inf	0.0061155	0.0670943
NA	NA	Auranticin A	Inf	0.0061155	0.0670943
NA	C10645	Atalaphylline	103.888	0.00681227	0.0670943
HMDB0015224	C01443	Ouabain	Inf	0.00711087	0.0670943
HMDB0028828	NA	Glutamylserine	Inf	0.00711087	0.0670943
HMDB0030005	NA	Austalide A	Inf	0.00711087	0.0670943
HMDB0029068	NA	Threonylphenylalanine	9.08349	0.00722394	0.0670943
HMDB0000243	C00022	Pyruvate	3.53439	0.00722394	0.0670943
HMDB0039229	NA	Pyroglutaminylglutamine	6.09685	0.00722394	0.0670943
HMDB0006695	NA	Prolylhydroxyproline	7.15526	0.00722394	0.0670943
HMDB0028995	NA	Phenylalanylglycine	5.70676	0.00722394	0.0670943
NA	NA	PFAP-PAP	4.70162	0.00722394	0.0670943
NA	NA	PC(17:1/18:2)	0.146216	0.00722394	0.0670943
HMDB0255025	C05324	Nicotianamine	14.332	0.00722394	0.0670943
HMDB0253897	NA	L-Isoleucinamide	0.520497	0.00722394	0.0670943
HMDB0000181	C00355	Levodopa	4.39657	0.00722394	0.0670943
NA	C08432	Isoguanosine	0.245514	0.00722394	0.0670943
HMDB0000133	C00387	Guanosine	0.228824	0.00722394	0.0670943
HMDB0000112	C00334	GABA	2.66625	0.00722394	0.0670943
HMDB0030994	NA	5-Heptyltetrahydro-2-Oxo-3-Furancarboxylic Acid	3.63303	0.00722394	0.0670943
HMDB0246030	NA	3,4-Dihydropyridine	2.47413	0.00722394	0.0670943
NA	NA	3-(2-Hydroxyethyl)-1H,3H-Quinazoline-2,4-Dione	3.14459	0.00722394	0.0670943
NA	NA	3-(2,6-Dihydroxyphenyl)-4-Hydroxy-6-Methyl-3H-2-Benzofuran-1-One	2.05638	0.00722394	0.0670943
HMDB0060677	C11004	2,6-Xylidine	0.428865	0.00722394	0.0670943
HMDB0249370	C09920	Brazilin	30.7098	0.00736114	0.0678802
NA	NA	3-Hydroxy-6-[[(E)-3-Hydroxy-2,4-Dimethylhept-4-EnoylAmino-2,4-Dimethyl-5-Oxohexanoic Acid	24.7253	0.00776682	0.0711132
HMDB0028829	NA	Glu-Thr	Inf	0.0079801	0.0711519
HMDB0000946	C07880	Ursodiol	7.27732	0.00804354	0.0711519
NA	NA	N-(4-Butylphenyl)(3,4,5-Trimethoxyphenyl)Carboxamide	96.3679	0.00804354	0.0711519
NA	NA	Pyroglu-Tyr	Inf	0.00816114	0.0711519
NA	NA	Imazapic	8.63414	0.00821196	0.0711519
NA	NA	Glu-Val-Phe	20.2852	0.00821196	0.0711519
NA	NA	5-[(E)-3-Hydroxybut-1-Enyl-4-[4-[(E)-3-Oxobut-1-EnylAnilinoOxolan-2-One	28.6999	0.00821196	0.0711519
NA	NA	(3E)-3-Benzylidene-4-Methyl-1H-1,4-Benzodiazepine-2,5-Dione	16.6052	0.00821196	0.0711519
HMDB0245528	NA	2-Desoxyuridine	11.4648	0.00829684	0.0714081
NA	NA	Cypridinid Etioluciferin	17.9699	0.00902934	0.0734148
NA	NA	[(2R,3S,4S,5R,6S)-6-(3,4-Dihydroxybenzoyl)Oxy-3,4,5-Trihydroxyoxan-2-YlMethyl 3,4-Dihydroxybenzoate	52.5282	0.00902934	0.0734148
NA	NA	Methyl 19-Hydroxy-14,18-Dimethyl-12-Azahexacyclo[10.6.1.1,.0,.0,.0,Icosa-3,7(20)-Diene-3-Carboxylate	Inf	0.00949409	0.0734148
NA	NA	Apiopaeonoside	Inf	0.00949409	0.0734148
NA	NA	[(3As,6Z,10Z,11Ar)-6-(Hydroxymethyl)-3-Methylidene-2-Oxo-3A,4,5,8,9,11A-Hexahydrocyclodeca[BFuran-10-YlMethyl Acetate	Inf	0.00949409	0.0734148
NA	NA	(2E)-3-(2H-Benzo[3,4-D1,3-Dioxolen-5-Yl)-2-(Acetylamino)-N-Benzylprop-2-Enami De	Inf	0.00949409	0.0734148
NA	NA	6-(2,4-Dihydroxy-3,5-Dimethylhexyl)-4-Hydroxy-3-Methylpyran-2-One	55.558	0.00970935	0.0734148
HMDB0014798	C07934	Metaxalone	5.31875	0.0102099	0.0734148
NA	NA	[4-(Phenylcarbonyl)Phenyl-N-[(3,4,5-Trimethoxyphenyl)MethylCarboxamide	19.2514	0.0102099	0.0734148
NA	NA	N-(3-Hydroxypropyl)-N-(3-Hydroxypropyl)Ethane-1,2-Diamide	10.6214	0.0103199	0.0734148
NA	NA	Lignocaine N-Oxide	0.378193	0.0103199	0.0734148
HMDB0028928	NA	Leucyl-Glutamate	9.29043	0.0103199	0.0734148
HMDB0028914	NA	Isoleucyl-Phenylalanine	4.05228	0.0103199	0.0734148
NA	NA	Herbasterol	0.381725	0.0103199	0.0734148
HMDB0062295	NA	Hepes	4.13137	0.0103199	0.0734148
HMDB0004089	C05653	Formylanthranilic Acid	1.37549	0.0103199	0.0734148
HMDB0000930	C10438	Cinnamic Acid	4.95789	0.0103199	0.0734148
NA	C10649	Bucharaine	9.64087	0.0103199	0.0734148
HMDB0040408	NA	7-Hydroxy-2-Methyl-4-Oxo-4H-1-Benzopyran-5-Acetic Acid	7.79163	0.0103199	0.0734148
HMDB0000779	C01479	3-Phenyllactic Acid	4.91299	0.0103199	0.0734148
HMDB0246093	NA	3-Deoxyinosine	4.20598	0.0103199	0.0734148
HMDB0033624	NA	2-Hydroxy-3-(2-Hydroxyphenyl)Propanoic Acid	3.70251	0.0103199	0.0734148
NA	NA	2,4-Dimethylbenzenesulfonic Acid	0.463574	0.0103199	0.0734148
HMDB0030346	C09910	(S)-Actinidine	0.534465	0.0103199	0.0734148
NA	NA	Hexyl 2-[(4-Hydroxy-2-Oxo-3-Hydroquinolyl)CarbonylaminoBenzoate	11.3504	0.0105505	0.0734148
NA	NA	Ethyl 2-Amino-6-(Hydroxymethyl)-8-Oxo-4-(3-Pyridyl)-4H-Pyrano[3,2-BPyran-3-Ca Rboxylate	5.25011	0.0105505	0.0734148
NA	NA	Epiequisetin	9.82712	0.0105505	0.0734148
HMDB0240845	NA	5-Methylpentadecanoylcarnitine	Inf	0.0106861	0.0734148
NA	NA	PG 16:0_20:5;O	24.1672	0.0107574	0.0734148
NA	NA	Methyl 3-Phenyl-2-(Phenylformamido)Propanoate	6.01298	0.0107574	0.0734148
HMDB0003312	C10208	Daidzein	21.3343	0.0107574	0.0734148
HMDB0031702	NA	1-Piperidinecarboxaldehyde	16.1039	0.0107574	0.0734148
NA	NA	{4-[(4-Hydroxy-6-Propylpyrimidin-2-Ylthio)MethylPhenyl}-N-(3-Methylphenyl)Car Boxamide	10.5714	0.0107574	0.0734148
HMDB0015621	D01142	Sulfadimethoxine	Inf	0.010799	0.0734148
NA	NA	Quinovin	Inf	0.010799	0.0734148
NA	C02886	Hexylglutathione	Inf	0.010799	0.0734148
NA	NA	3-(2-Hydroxy-3-Methoxyphenyl)-1,5-Dimethyl-4,6-Dioxo-1,2,3,5,3A,6A-Hexahydro-2 ,5-Diazapentalenecarboxylic Acid	Inf	0.010799	0.0734148
NA	NA	[4-(2-1,2,3,4-Tetrahydroisoquinolylmethyl)Phenyl-N-(2-{[4-(2-1,2,3,4-Tetrahyd Roisoquinolylmethyl)PhenylCarbonylamino}Ethyl)Carboxamide	Inf	0.010799	0.0734148
HMDB0253404	C18598	Imazamox	6.15717	0.0108615	0.0734148
NA	NA	2-O-Methylinosine	2.36355	0.0108615	0.0734148
NA	NA	2-O-Methyl-5-Methyluridine	8.90629	0.0108615	0.0734148
NA	C10954	Naproanilide	31.1445	0.0118696	0.0764737
HMDB0245570	C16500	2,3,14-Trihydroxy-10,13-Dimethyl-17-(2,3,6,7-Tetrahydroxy-6-Methylheptan-2-Yl)-2,3,4,5,9,11,12,15,16,17-Decahydro-1H-Cyclopenta[APhenanthren-6-One	32.2556	0.0118696	0.0764737
NA	NA	PFAP-diPAP	Inf	0.0125654	0.0764737
NA	NA	N-[(1E)-2-(3,4,5-Trimethoxyphenyl)-1-Azavinyl-N-(3,4-Dimethylphenyl)Butane-1 ,4-Diamide	Inf	0.0125654	0.0764737
NA	NA	N-(4-Methylphenyl)-2-(1-Methyl-3-Phenylthioindol-2-Yl)Acetamide	Inf	0.0125654	0.0764737
NA	NA	Hwesasxx	Inf	0.0125654	0.0764737
NA	NA	2-[1-[4,5-Dihydroxy-3-[(2S,3R,4S,5S,6R)-3,4,5-Trihydroxy-6-(Hydroxymethyl)Oxan-2-YlOxyoxan-2-YlIndol-3-YlAcetic Acid	Inf	0.0125654	0.0764737
HMDB0001850	C07188	Verapamil	52.6681	0.0127035	0.0764737
HMDB0029007	NA	Phe-Tyr	8.70008	0.0127035	0.0764737
HMDB0028830	NA	Glutamyltryptophan	12.646	0.0127035	0.0764737
NA	NA	2-[Bisbenzylamino-1-(4-Hydroxy-3-Methoxyphenyl)Ethan-1-One, Chloride	61.9487	0.0127035	0.0764737
HMDB0000781	C16265	N-Acetylgalactosamine 4-Sulfate	22.7344	0.013315	0.0764737
NA	NA	Dehydroxynocardamine	7.23011	0.013315	0.0764737
HMDB0003357	C00437	N-Acetylornithine	16.0499	0.0137298	0.0764737
NA	NA	(E)-5-Hydroxy-N-[3-[5-[3-[[(E)-5-Hydroxy-3-Methylpent-2-EnoylAminoPropyl-3,6-Dioxopiperazin-2-YlPropyl-3-Methylpent-2-Enamide	7.55318	0.0137298	0.0764737
NA	NA	(+)-12-Hydroxyamorphigenin	20.988	0.0137298	0.0764737
HMDB0029415	C03727	Carbocysteine	Inf	0.0138843	0.0764737
HMDB0029365	C02717	Feruloyltyramine	16.1301	0.0139815	0.0764737
HMDB0245534	NA	2-Deoxyadenosine 3-Monophosphate	8.11307	0.0139815	0.0764737
NA	NA	Tetrasaccharides	4.59871	0.0141081	0.0764737
NA	NA	N-{4-[N-BenzylcarbamoylPhenyl}(3,4,5-Trimethoxyphenyl)Carboxamide	6.69715	0.0141081	0.0764737
HMDB0028924	NA	Leucyl-Asparagine	8.03151	0.0141081	0.0764737
NA	NA	Veratroylzygadenine	Inf	0.0141693	0.0764737
NA	NA	N-[4-(Methylethyl)Phenyl-2-(9-Methyl-6-Oxohydropurin-8-Ylthio)Butanamide	Inf	0.0141693	0.0764737
HMDB0000619	C00695	Cholic Acid	Inf	0.0141693	0.0764737
NA	NA	[(1R,2S,4R,5S,6S,11R,12R,14S,16R)-5,6,11-Trihydroxy-4-(Hydroxymethyl)-8,12,15,15-Tetramethyl-7-Oxo-3-Oxapentacyclo[9.5.0.02,4.06,10.014,16Hexadec-8-En-14-Yl Dodecanoate	Inf	0.0141792	0.0764737
HMDB0029108	NA	Tyrosylisoleucine	2.54274	0.0142759	0.0764737
HMDB0006088	C06153	Scyllo-Inositol	6.77457	0.0142759	0.0764737
HMDB0014483	C01956	Pyrazinamide	0.0047989	0.0142759	0.0764737
HMDB0033482	NA	Plantagonine	0.490594	0.0142759	0.0764737
HMDB0000208	C00026	Oxoglutaric Acid	3.05264	0.0142759	0.0764737
HMDB0240253	C19478	N-Acetyltaurine	2.11471	0.0142759	0.0764737
HMDB0000230	C00270	N-Acetylneuraminic Acid	4.9143	0.0142759	0.0764737
HMDB0033675	C04020	L-Lysopine	11.2048	0.0142759	0.0764737
HMDB0028932	NA	Leucyl-Isoleucine	6.66063	0.0142759	0.0764737
HMDB0000763	C05635	Hydroxyindoleacetic Acid	0.378766	0.0142759	0.0764737
HMDB0028801	NA	Glutaminylleucine	10.9654	0.0142759	0.0764737
HMDB0011170	NA	Gamma-Glutamylisoleucine	5.5988	0.0142759	0.0764737
HMDB0038017	NA	Ethyl 2-Phenyl-3-Furancarboxylate	5.594	0.0142759	0.0764737
HMDB0001570	C00364	Cyclic 3,5-Dtmp	0.183428	0.0142759	0.0764737
NA	NA	Benzododecinium	0.368015	0.0142759	0.0764737
NA	C18415	Benthiavalicarb Isopropyl	4.97681	0.0142759	0.0764737
HMDB0000044	C00072	Ascorbic Acid	95.5356	0.0142759	0.0764737
HMDB0001310	C01401	Alanine	3.09158	0.0142759	0.0764737
HMDB0000212	C01074	Acetylgalactosamine	3.6833	0.0142759	0.0764737
HMDB0004081	C05643	6-Hydroxymelatonin	5.96941	0.0142759	0.0764737
NA	NA	6-Amino-4-(4-Hydroxyphenyl)-3-Propyl-4H-Pyrano[3,2-DPyrazole-5-Carbonitrile	0.146447	0.0142759	0.0764737
HMDB0000694	C03196	2-Hydroxyglutaric Acid, (S)-	2.61999	0.0142759	0.0764737
HMDB0062676	NA	2-Hydroxyacrylic Acid	1.69671	0.0142759	0.0764737
NA	NA	(1S,4S,8R,14S)-11-Ethyl-12-Oxo-7,9,13-Trioxatetracyclo[6.5.1.0(1),(1).0,(1)Tetradeca-2,5-Diene-5-Carboxylic Acid	0.675855	0.0142759	0.0764737
HMDB0028997	NA	Phenylalanylhistidine	28.7705	0.0154756	0.0825576
HMDB0004620	NA	N-Acetyl-L-Arginine	7.66424	0.0164876	0.0859304
HMDB0036438	NA	Fasciculic Acid B	7.39832	0.0164876	0.0859304
NA	NA	Alpha-D-Glucopyranoside, Alpha-D-Glucopyranosyl, 3-(2-Methylbutanoate)	17.1332	0.0164876	0.0859304
HMDB0244873	NA	2H-Benzotriazole	6.29797	0.0164876	0.0859304
NA	NA	Methyl 2-{[4-(Acetylamino)PhenylCarbonylamino}Acetate	13.6316	0.017227	0.0859304
HMDB0302955	NA	Manghaslin	6.24221	0.017227	0.0859304
NA	NA	5-Hydroxymethyluridine	6.39366	0.017227	0.0859304
HMDB0011600	C00913	3-Methyladenine	6.19553	0.017227	0.0859304
NA	NA	2-[3-[4-[1,3-Dihydroxy-1-(4-Hydroxy-3-Methoxyphenyl)Propan-2-YlOxy-3-MethoxyphenylPropoxy-6-(Hydroxymethyl)Oxane-3,4,5-Triol	8.38798	0.017227	0.0859304
HMDB0029009	NA	Phenylalanyl-Gamma-Glutamate	9.5681	0.0177273	0.0859304
NA	NA	[4-[(3,5-Dimethylphenyl)CarbamoylaminoPhenyl Sulfamate	4.59406	0.0180304	0.0859304
HMDB0029103	NA	Tyrosylglutamine	5.55453	0.0181827	0.0859304
HMDB0251174	NA	Dibutylamine	0.0118902	0.0181827	0.0859304
HMDB0034367	NA	Gamma-Glutamylmethionine	Inf	0.0184358	0.0859304
NA	NA	7-Chloro-4,8-Dihydroxy-6-Methoxy-3-Methyl-3,4-Dihydroisochromen-1-One	Inf	0.0184358	0.0859304
NA	NA	3,5-Dihydroxy-4-[3,4,5-Trihydroxy-6-[[4-(2-Hydroxypropan-2-Yl)Cyclohexene-1-CarbonylOxymethylOxan-2-YlOxybenzoic Acid	Inf	0.0184358	0.0859304
HMDB0000860	NA	2-(3-Phenylpropanamido)Acetic Acid	Inf	0.0184358	0.0859304
HMDB0256221	C11019	Pendimethalin	Inf	0.0186436	0.0859304
HMDB0000254	C00042	Succinic Acid	3.89079	0.0194358	0.0859304
HMDB0003219	C02076	Sedoheptulose	35.2003	0.0194358	0.0859304
HMDB0000271	C00213	Sarcosine	2.47926	0.0194358	0.0859304
HMDB0001431	C00534	Pyridoxamine Dihydrochloride	5.3339	0.0194358	0.0859304
HMDB0000245	C00931	Porphobilinogen	3.91312	0.0194358	0.0859304
HMDB0000224	C00346	Phosphorylethanolamine	8.26551	0.0194358	0.0859304
NA	NA	N-Epsilon-Formyl-L-Lysine	3.14984	0.0194358	0.0859304
HMDB0240365	NA	N,N,N-Trimethyl-L-Alanyl-L-Proline Betaine	5.66113	0.0194358	0.0859304
HMDB0011730	C08243	Melezitose	9.643	0.0194358	0.0859304
HMDB0000157	C00262	Hypoxanthine	0.457872	0.0194358	0.0859304
HMDB0000132	C00242	Guanine	0.331161	0.0194358	0.0859304
HMDB0014447	C12535	Cyclohexanecarboxylic Acid, 4-(Aminomethyl)-	2.13724	0.0194358	0.0859304
HMDB0031340	C02824	Cyclamic Acid	1.31249	0.0194358	0.0859304
HMDB0034171	C16074	Benzeneacetonitrile	1.95493	0.0194358	0.0859304
HMDB0003573	C01479	Atropine	4.78904	0.0194358	0.0859304
HMDB0001123	C00108	Anthranilic Acid	2.04347	0.0194358	0.0859304
HMDB0014328	C07514	Amphetamine	0.331614	0.0194358	0.0859304
HMDB0001151	C01487	Allose	2.81837	0.0194358	0.0859304
NA	C06691	Actinorhodin	0.280058	0.0194358	0.0859304
HMDB0000072	C00417	Aconitic Acid	4.18824	0.0194358	0.0859304
HMDB0248216	C05402	6-O-(Alpha-D-Galactopyranosyl)-D-Glucopyranose	16.2527	0.0194358	0.0859304
HMDB0003355	C00431	5-Aminovaleric Acid	1.6005	0.0194358	0.0859304
HMDB0031256	NA	4-Hydroxy-2H-Pyran-3-Carboxaldehyde	2.79569	0.0194358	0.0859304
HMDB0060371	C02514	3-Fumarylpyruvate	5.30273	0.0194358	0.0859304
HMDB0240312	C05822	3-Cytidylic Acid	0.450676	0.0194358	0.0859304
HMDB0245805	NA	3-Amino-2,2-Dimethylpropanoic Acid	2.61373	0.0194358	0.0859304
HMDB0252169	NA	3,7,11-Trimethyldodeca-2,6,10-Trienoic Acid	0.00514324	0.0194358	0.0859304
HMDB0001975	NA	2-Ethyl-2-Hydroxybutyric Acid	3.75405	0.0194358	0.0859304
HMDB0034587	NA	1-Pyrrolidinecarboxaldehyde	2.10223	0.0194358	0.0859304
NA	NA	10-Norparvulenone	0.441165	0.0194358	0.0859304
NA	NA	1-[4,5-Bis(Hydroxymethyl)-3-Methoxy-2-Methylphenoxy-3-Methylbutane-2,3-Diol	0.115244	0.0194358	0.0859304
HMDB0254327	C08236	1,3,4,5,6,7-Hexahydroxyheptan-2-One	3.40656	0.0194358	0.0859304
HMDB0028989	NA	Phenylalanylarginine	24.5578	0.0200126	0.0878785
NA	NA	Methyl 4,10-Diacetyloxy-5,9-Dihydroxy-1,4A-Dimethyl-7-Propan-2-Yl-2,3,4,9,10,10A-Hexahydrophenanthrene-1-Carboxylate	23.3776	0.0200126	0.0878785
HMDB0061115	C09213	Hypaphorine	30.3304	0.0212282	0.0922746
HMDB0034362	C08858	Convallatoxin	15.3729	0.0212282	0.0922746
HMDB0062551	NA	4-Ethylphenylsulfate	11.3676	0.0212282	0.0922746
HMDB0003553	C01613	Stachyose	40.6171	0.022113	0.0957981
HMDB0002545	C00333	D-Galacturonic Acid	1.54737	0.0227103	0.0974052
NA	NA	2-Methoxyethyl 5-Hydroxy-2-Methyl-1-{3-[(4-Nitrophenyl)AminoPropyl}Benzo[GIn Dole-3-Carboxylate	5.69797	0.0227103	0.0974052
NA	NA	(5-Nitro(2-Pyridyl))[(3,4,5-Trimethoxyphenyl)MethylAmine	8.116	0.0227103	0.0974052
HMDB0000953	NA	Suberylglycine	10.7764	0.0230715	0.0981027
HMDB0303943	C01617	Taxifolin	6.83533	0.0232528	0.0981027
NA	NA	N-Ethyl-N-(4-Ethylphenyl)-2-[(4-Hydroxyquinazolin-2-Yl)ThioAcetamide	4.54104	0.0232528	0.0981027
HMDB0033854	C21402	Isoprenyl Alcohol	9.33646	0.0232528	0.0981027
NA	NA	2-[2-[(Z)-Pent-2-Enyl-3-[3,4,5-Trihydroxy-6-(Hydroxymethyl)Oxan-2-YlOxycyclopentylAcetic Acid	4.5023	0.0232528	0.0981027
NA	C18885	Propamocarb	Inf	0.0246843	0.0991296
NA	NA	N-(2,6-Dimethylphenyl)-2-[2-Oxo-4-(N-Propylcarbamoyl)HydroquinolylAcetamide	37.9626	0.02567	0.0991296
HMDB0000625	C00257	Gluconic Acid	13.7899	0.02567	0.0991296
HMDB0004679	C14776	8(S)-Hete	4.41473	0.02567	0.0991296
HMDB0011729	C03661	1-Kestose	40.9122	0.02567	0.0991296
HMDB0259814	C01626	Vindoline	4.04952	0.0257998	0.0991296
HMDB0000167	C00188	Threonine	9.1684	0.0257998	0.0991296
HMDB0251530	C00725	Thioctic Acid	2.14077	0.0257998	0.0991296
NA	NA	Pyroglu-Val	8.19142	0.0257998	0.0991296
HMDB0060503	C07090	Protoanemonin	3.52966	0.0257998	0.0991296
HMDB0000228	C00146	Phenol	1.51861	0.0257998	0.0991296
NA	NA	PFSM-ammonio_N_CMAmP_FT_FOSA	6.93484	0.0257998	0.0991296
HMDB0033112	NA	Methylpyrazine	1.45944	0.0257998	0.0991296
HMDB0031864	C10454	Methyleugenol	7.72043	0.0257998	0.0991296
HMDB0041929	NA	Methoxyacetic Acid	2.497	0.0257998	0.0991296
HMDB0000641	C00064	L-Glutamine	2.06045	0.0257998	0.0991296
HMDB0000687	C16439	Leucine	1.97764	0.0257998	0.0991296
HMDB0001314	C00942	Cyclic Gmp	0.338137	0.0257998	0.0991296
HMDB0000904	C00327	Citrulline	3.78576	0.0257998	0.0991296
HMDB0030677	C00811	Cis-P-Coumaric Acid	2.19968	0.0257998	0.0991296
HMDB0002335	NA	Aspartyl-Proline	8.19261	0.0257998	0.0991296
HMDB0028690	NA	Ala-Ile	3.72178	0.0257998	0.0991296
HMDB0000201	C02571	Acetyl-L-Carnitine	2.50765	0.0257998	0.0991296
NA	NA	7-Benzyloxytryptamine	2.67861	0.0257998	0.0991296
HMDB0000095	C00055	5-CMP	0.574558	0.0257998	0.0991296
HMDB0001232	C00870	4-Nitrophenol	0.641429	0.0257998	0.0991296
HMDB0029170	NA	3-Hydroxy-4-Methoxymandelate	3.27507	0.0257998	0.0991296
HMDB0029636	C07214	2-Methylbenzaldehyde	2.74477	0.0257998	0.0991296
NA	NA	2H-Pyrido[1,2-A[1,4,7,10Tetraazacyclododecine-1,4,7,10(3H,12H)-Tetrone, 3-(7,8-Dihydroxy-6-Oxooctyl)Octahydro-9-(1-Methylpropyl)-6-(Phenylmethyl)-	2.61689	0.0257998	0.0991296
HMDB0010737	NA	(R)-3-Hydroxy-Octadecanoic Acid	1.81282	0.0257998	0.0991296
HMDB0252200	C06996	Fenfluramine	3.33101	0.0271145	0.103259
NA	NA	3-Indol-3-Yl-2-[(4-Methoxyphenyl)CarbonylaminoPropanoic Acid	7.57861	0.0271145	0.103259
NA	NA	1-Naphthalenecarboxylic Acid, 3-(Acetyloxy)-5-[2-(3-Furanyl)Ethyl-3,4,4A,5,6,7,8,8A-Octahydro-8A-(Hydroxymethyl)-5,6-Dimethyl-	52.3791	0.0271145	0.103259
NA	NA	N-{(1E)-2-[4-(Dimethylamino)Phenyl-1-Azavinyl}-2-[(3,5-Dioxo(2H,4H-1,2,4-Tria Zin-6-Yl))AminoAcetamide	16.4533	0.0281624	0.105384
NA	NA	N-(Benzimidazol-2-Ylethyl)-2-(4-Hydroxyquinazolin-2-Ylthio)Acetamide	7.48538	0.0281624	0.105384
NA	NA	Hypothallin	5.47926	0.0281624	0.105384
HMDB0028847	NA	Glycylmethionine	4.04364	0.0281624	0.105384
HMDB0011741	NA	Gamma-Glutamyltyrosine	6.94786	0.0281624	0.105384
NA	NA	2-[2-Oxo-4-(Piperidylcarbonyl)Hydroquinolyl-N-(2,4,6-Trimethylphenyl)Acetamid E	19.208	0.0281624	0.105384
HMDB0258305	C09643	Sinomenine	8.51542	0.0288681	0.106114
HMDB0253690	C05334	Isosakuranetin	7.01765	0.0288681	0.106114
HMDB0011171	NA	Gamma-Glutamylleucine	4.85472	0.0288681	0.106114
HMDB0246885	NA	5-O-Methylthymidine	8.28715	0.0288681	0.106114
HMDB0028917	NA	2-(2-Amino-3-Methylpentanamido)-3-Hydroxybutanoic Acid	3.13043	0.0288681	0.106114
HMDB0002825	C07480	Theobromine	7.1957	0.0292942	0.106114
NA	NA	N-Phenyl[(9,11,13-Trimethyl-8,15-Dioxatetracyclo[10.2.2.0<2,7.0<9,14Hexadec A-2(7),3,5-Trien-12-Yl)MethoxyCarboxamide	6.76513	0.0292942	0.106114
NA	NA	N-Cyclohexyl-2-[1-(4-Methoxyphenyl)(1,2,3,4-Tetrahydrobeta-Carbolin-2-Yl)Acet Amide	9.45956	0.0292942	0.106114
NA	NA	N-[2-(3,4-Dimethoxyphenyl)Ethyl-2-(4-Methylphenoxy)Acetamide	19.3224	0.0292942	0.106114
HMDB0248860	NA	Baohuoside I	0.0289598	0.0292942	0.106114
HMDB0000706	NA	Aspartyl-Phenylalanine	7.14305	0.0292942	0.106114
HMDB0029098	NA	Tyr-Ala	6.63101	0.029508	0.106114
HMDB0015418	C12662	Josamycin	6.32153	0.029508	0.106114
HMDB0003581	C01909	Desthiobiotin	6.01105	0.029508	0.106114
NA	NA	Isoleucyl-Glycyl-Isoleucine	Inf	0.0304367	0.108847
NA	NA	3-[2-(2,3-Dihydroxy-5,6,8A-Trimethyloctahydro-2H-Spiro[Naphthalene-1,2-Oxiran-5-Yl)Ethyl-5-Hydroxyfuran-2(5H)-One	Inf	0.0304367	0.108847
NA	NA	Deacetylgedunin	51.186	0.0326611	0.111592
NA	NA	2,2,6,6-Tetramethyl-5-Hydroxy-4-(Alpha-Isopropyl-2,4,6-Trihydroxy-3-Isobutyrylbenzyl)-4-Cyclohexene-1,3-Dione	5.81632	0.0326611	0.111592
HMDB0000292	C00385	Xanthine	3.79362	0.0338837	0.111592
HMDB0000300	C00106	Uracil	1.82342	0.0338837	0.111592
HMDB0000926	C00747	Pyridine	3.29921	0.0338837	0.111592
HMDB0003411	C00763	Proline	1.68546	0.0338837	0.111592
HMDB0000210	C00864	Pantothenic Acid	3.04372	0.0338837	0.111592
HMDB0240784	NA	O-Propanoyl-D-Carnitine	2.40839	0.0338837	0.111592
HMDB0062183	NA	N-Lactoyl-Glycine	3.00571	0.0338837	0.111592
NA	NA	N-Butylbenzenesulfonamide	2.98295	0.0338837	0.111592
HMDB0061384	NA	N-(3-Acetamidopropyl)Pyrrolidin-2-One	2.51957	0.0338837	0.111592
NA	C09103	Grayanotoxin I	11.4078	0.0338837	0.111592
HMDB0028832	NA	Glutamylvaline	5.48497	0.0338837	0.111592
HMDB0003464	C01035	Gamma-Guanidinobutyric Acid	10.157	0.0338837	0.111592
HMDB0004983	C11142	Dimethyl Sulfone	2.76978	0.0338837	0.111592
HMDB0000076	C00429	Dihydrouracil	2.1396	0.0338837	0.111592
HMDB0251169	NA	Dibenzylamine	0.405871	0.0338837	0.111592
HMDB0000562	C00791	Creatinine	3.47891	0.0338837	0.111592
NA	C18817	Chlorotoluron	0.398898	0.0338837	0.111592
HMDB0001138	C00624	Acetyl Glutamic Acid	5.14555	0.0338837	0.111592
HMDB0246635	NA	4-Hydroxymethohexital	5.15837	0.0338837	0.111592
HMDB0246419	NA	4-Ethylaniline	0.290212	0.0338837	0.111592
NA	NA	3-(5,7-Dimethoxy-4-Oxochromen-2-Yl)Propanoic Acid	3.95351	0.0338837	0.111592
HMDB0258301	C05610	2-Propenal, 3-(4-Hydroxy-3,5-Dimethoxyphenyl)-	0.674745	0.0338837	0.111592
HMDB0000402	C02504	2-Isopropylmalic Acid, (S)-(+)-	2.25209	0.0338837	0.111592
HMDB0000402	C02504	2-Isopropylmalic Acid	1.52392	0.0338837	0.111592
HMDB0244994	NA	2-Amino-5-(Amino-Dimethylamino-Methylidene)Amino-Pentanoic Acid	6.86695	0.0338837	0.111592
NA	C06670	2,4-Dichlorobenzoic Acid	9.39903	0.0338837	0.111592
NA	NA	2,3,4,6-Tetrahydroxy-5-Oxo-5H-Benzo[7Annulene-8-Carboxylic Acid	1.65847	0.0338837	0.111592
NA	NA	1-(Aminocarbonyl)-L-Proline	3.93155	0.0338837	0.111592
NA	NA	(1As,2Z,4E,14R,15As)-8-Chloro-9,11-Dihydroxy-14-Methyl-1A,14,15,15A-Tetrahydro-6H-Oxireno[E[2Benzoxacyclotetradecine-6,12(7H)-Dione	2.74456	0.0338837	0.111592
NA	NA	L-Pyroglutamyl-L-Phenylalanine	6.54254	0.0343594	0.11287
HMDB0013302	NA	Phenylalanylphenylalanine	4.79324	0.0355873	0.115146
HMDB0041947	NA	N1,N8-Diacetylspermidine	14.3078	0.0355873	0.115146
NA	NA	LPI(19:0)	6.60719	0.0355873	0.115146
HMDB0242414	C05464	Deoxycholylglycine	5.55809	0.0355873	0.115146
NA	NA	15,16-Dimethoxytricyclo[12.3.1.12,6Nonadeca-1(17),2,4,6(19),14(18),15-Hexaene-3,9,17-Triol	22.0218	0.0355873	0.115146
NA	NA	(1R,3As,3Br,6Ar,7As,9R,11R,11As,12Ar,13Ar,15Ar)-3A,11,11A-Trihydroxy-9,15A-Dimethyl-1-(5-Oxo-2,5-Dihydro-3-Furanyl)Icosahydro-7Ah,13Ah-Cyclopenta[7,8Phenanthro[2,3-BPyrano[3,2-E[1,4Dioxine-13A-Carbaldehyde	6.26482	0.0355873	0.115146
HMDB0028686	C20958	Alanylglutamic Acid	10.0171	0.0364124	0.117228
NA	NA	[(2R,3S,4S,5R,6R)-3,4,5-Trihydroxy-6-[(2R,3R,4S,5S,6R)-3,4,5-Trihydroxy-6-(Hydroxymethyl)Oxan-2-YlOxyoxan-2-YlMethyl 7-Methyloctanoate	9.20068	0.0364124	0.117228
HMDB0000286	C00029	UDP-Glucose	7.77911	0.0369099	0.117869
NA	NA	6-Hydroxymethyl-2,2-Dimethyl-Dihydro-Furo(3,4-D)(1,3)Dioxol-4-One	3.35106	0.0369099	0.117869
HMDB0253025	NA	Phenylalanylleucine	4.52005	0.0371593	0.117869
NA	NA	Methyl 2-Amino-4-(2-Bromophenyl)-5-Oxo-4H-Pyrano[3,2-CChromene-3-Carboxylate	0.426762	0.0371593	0.117869
HMDB0003459	C00993	D-Alanyl-D-Alanine	4.79035	0.0371593	0.117869
NA	NA	2-O-Methyl-5-Methylcytidine	5.04473	0.0371593	0.117869
NA	NA	Quinelorane Dihydrochloride	Inf	0.0386244	0.121917
HMDB0004668	C14765	13-OxoODE	Inf	0.0386244	0.121917
NA	NA	4-[(E)-3-[(2R,3R,4S,5S,6R)-3-[(2S,3R,4R)-3,4-Dihydroxy-4-(Hydroxymethyl)Oxolan-2-YlOxy-4,5-Dihydroxy-6-(Hydroxymethyl)Oxan-2-YlOxybut-1-Enyl-3,5,5-Trimethylcyclohex-2-En-1-One	14.1003	0.0412229	0.129802
HMDB0062195	C04598	1-Hexadecyl-2-Acetyl-Glycero-3-Phosphocholine	5.32617	0.0431979	0.13086
HMDB0062590	C01456	Tropic Acid	1.67294	0.0436877	0.13086
NA	NA	Sparteine-15-Carboxylic Acid	0.171704	0.0436877	0.13086
HMDB0029032	NA	Serylalanine	3.43858	0.0436877	0.13086
HMDB0257686	NA	Polyinosinic Acid	2.88919	0.0436877	0.13086
HMDB0000803	C03878	N-Acetylglucosamine	5.86223	0.0436877	0.13086
NA	NA	N-{4-[(3,5-Dimethoxyphenyl)CarbonylaminoPhenyl}Acetamide	1.61401	0.0436877	0.13086
HMDB0033752	C01198	Melilotic Acid	2.74661	0.0436877	0.13086
HMDB0011111	C00222	Malonic Semialdehyde	3.12344	0.0436877	0.13086
HMDB0028928	NA	Leu-Glu	3.19264	0.0436877	0.13086
NA	NA	Koninginin E	3.93856	0.0436877	0.13086
HMDB0059622	C03081	Hymecromone	3.79408	0.0436877	0.13086
HMDB0004814	NA	Dipropyl Ketone	0.620621	0.0436877	0.13086
HMDB0000634	C02226	Citraconic Acid	1.74895	0.0436877	0.13086
HMDB0249241	NA	Bistris	6.33891	0.0436877	0.13086
HMDB0001252	C00576	Betaine Aldehyde	0.423888	0.0436877	0.13086
NA	NA	2-Oxo-1H-Quinoline-4-Carboxylic Acid	4.04677	0.0436877	0.13086
HMDB0011691	C00127	2,3 Cyclic-Cmp	0.458406	0.0436877	0.13086
HMDB0002074	NA	2,2-Dimethylsuccinic Acid	1.84569	0.0436877	0.13086
HMDB0012133	C02351	1,2-Benzoquinone	2.52484	0.0436877	0.13086
NA	NA	(5E)-10-Heptyl-3,4,5,8,9,10-Hexahydro-5,8,9-Trihydroxy-2H-Oxecin-2-One	7.41423	0.0436877	0.13086
HMDB0000462	C01551	Allantoin	4.40023	0.0446213	0.133347
HMDB0003213	C00492	Raffinose	Inf	0.0452636	0.13495
HMDB0029109	NA	Tyrosylleucine	2.60911	0.0455758	0.13495
NA	NA	N-(3-Chloro-4-Fluorophenyl)-2-{2-Oxo-4-[N-BenzylcarbamoylHydroquinolyl}Acetam Ide	18.1867	0.0455758	0.13495
NA	NA	2-[4-Hydroxy-2,5-Bis(Hydroxymethyl)-2-[3,4,5-Trihydroxy-6-(Hydroxymethyl)Oxan-2-YlOxyoxolan-3-YlOxy-6-(Hydroxymethyl)Oxane-3,4,5-Triol	4.75844	0.0455758	0.13495
NA	NA	PFSM-ammonio	0.434527	0.0461505	0.135332
HMDB0028901	NA	Isoleucylarginine	4.78754	0.0461505	0.135332
NA	NA	2-((4-Ethyl-8,8-Dimethyl-2-Oxo-2,8,9,10-Tetrahydropyrano[2,3-FChromen-5-Yl)Oxy)-N-Isopropylacetamide	10.2423	0.0461505	0.135332
HMDB0028931	NA	Leu-His	4.00772	0.0464384	0.135332
HMDB0253423	NA	Imidazooxazole	5.52906	0.0464384	0.135332
HMDB0036103	C16461	Geranic Acid	2.14543	0.0464384	0.135332
NA	NA	3-Hydroxy-6,6-Dimethyl-2-(3,4,5-Trimethoxyphenyl)-3,5,6,7-Tetrahydrobenzimidaz Ol-4-One	3.56009	0.0464384	0.135332
HMDB0304413	C09581	Magnoflorine	Inf	0.0486127	0.140825
NA	NA	2-Decyl-3-Hydroxypentanedioic Acid	Inf	0.0486127	0.140825
NA	NA	Biotin Methyl Ester	Inf	0.0487597	0.140825
HMDB0041832	C10025	Baicalin	Inf	0.0487597	0.140825
NA	NA	Scutellarin	Inf	0.0495591	0.142814
HMDB0001296	C02052	Maltotetraose	13.923	0.0516142	0.14742
HMDB0254881	NA	2-Hydroxy-3-Morpholinopropanesulfonic Acid	29.213	0.0516142	0.14742
NA	NA	2,4A,6-Trihydroxy-8-Isopropyl-1,1-Dimethyl-2,3,4,4A,5,10,11,11A-Octahydro-1H-Dibenzo[A,D[7Annulen-7-Yl Beta-D-Glucopyranoside	5.2075	0.0516142	0.14742
NA	NA	{4,5-Dimethoxy-3-[(3,4,5-Trimethoxyphenyl)CarbonylaminoPhenyl}-N,N-Diethylcar Boxamide	7.96285	0.0516142	0.14742
NA	NA	Methyl 2-[(3-Formamido-2-Hydroxybenzoyl)Amino-3-Hydroxybutanoate	12.75	0.0538857	0.148645
HMDB0001261	C05770	Coproporphyrin III	4.23214	0.0538857	0.148645
NA	NA	(2E,4E)-N-[2-(4-Hydroxyphenyl)EthylDodeca-2,4-Dienamide	5.01824	0.0538857	0.148645
HMDB0033585	NA	Acesulfame	30.6319	0.0543701	0.148645
NA	NA	6-Amino-4-(4-Hydroxy-5-Methoxy-3-Nitrophenyl)-3-Methyl-1-Phenyl-4H-Pyrano[3,2- DPyrazole-5-Carbonitrile	6.77171	0.0555178	0.148645
HMDB0000875	C01004	Trigonelline	2.08281	0.0557276	0.148645
HMDB0032523	C19524	Succinic Anhydride	1.28773	0.0557276	0.148645
HMDB0029043	NA	Ser-Leu	2.51258	0.0557276	0.148645
HMDB0029010	NA	Prolylalanine	4.65391	0.0557276	0.148645
NA	NA	PFCA-unsaturated	0.431586	0.0557276	0.148645
HMDB0002141	NA	N-Methyl-A-Aminoisobutyric Acid	2.97135	0.0557276	0.148645
HMDB0000206	C02727	N6-Acetyl-L-Lysine	3.8478	0.0557276	0.148645
HMDB0001276	C00612	N1-Acetylspermidine	4.27405	0.0557276	0.148645
HMDB0000169	C00159	Mannose	2.47006	0.0557276	0.148645
NA	NA	Maloformin B4	8.11428	0.0557276	0.148645
HMDB0029156	NA	Glutamylphenylalanine	4.45762	0.0557276	0.148645
NA	NA	Dimethenamide Esa	0.186999	0.0557276	0.148645
NA	NA	Difluoro(Perfluoromethoxy)Acetic Acid	1.16822	0.0557276	0.148645
HMDB0000064	C00300	Creatine	2.15403	0.0557276	0.148645
HMDB0002013	C02862	Butyrylcarnitine	2.51702	0.0557276	0.148645
HMDB0302856	C08268	Baikiain	1.82367	0.0557276	0.148645
HMDB0028757	NA	Aspartylleucine	2.89084	0.0557276	0.148645
NA	NA	7-Hydroxy-3-Phenyl-8-(Piperidylmethyl)Chromen-4-One	5.89247	0.0557276	0.148645
HMDB0000472	C01017	5-Hydroxytryptophan	4.48699	0.0557276	0.148645
NA	NA	4-(3-(((2R,4S,5S,6R)-4,5-Dihydroxy-6-Methyltetrahydro-2H-Pyran-2-Yl)Oxy)-10-((E)-((4-Fluorophenethyl)Imino)Methyl)-5,14-Dihydroxy-13-Methylhexadecahydro-1H-Cyclopenta[APhenanthren-17-Yl)Furan-2(5H)-One	0.148194	0.0557276	0.148645
HMDB0002035	C00811	2-Propenoic Acid, 3-(4-Hydroxyphenyl)-, (2Z)-	2.4955	0.0557276	0.148645
NA	NA	2-((2H-Pyrazolo[3,4-DPyrimidin-4-Yl)Amino)Ethanol	2.17092	0.0557276	0.148645
NA	NA	1,3,7-Trimethyl-9-Hydroxy-9H-Purine-2,6,8(1H,3H,7H)-Trione	2.2113	0.0557276	0.148645
NA	NA	{6-[(2S)-5-Acetyloxy-2-(4-Acetyloxyphenyl)-4-Oxochroman-7-Yloxy-3,4,5-Triacet Yloxy-2H-3,4,5,6-Tetrahydropyran-2-Yl}Methyl (2E)-3-(4-Acetyloxyphenyl)Prop-2- Enoate	4.58184	0.0557276	0.148645
NA	NA	[3-Hydroxy-1-[3-Hydroxy-1-Oxo-1-(2,3,4,5,6-Pentahydroxyhexoxy)Decan-5-YlOxy-1-Oxodecan-5-Yl 3,5-Dihydroxydecanoate	0.192706	0.0557276	0.148645
NA	NA	(2R)-2-[(2R,5S)-5-[(2S)-2-HydroxybutylOxolan-2-YlPropanoic Acid	0.383334	0.0557276	0.148645
NA	NA	(+)-Aerugine	5.61356	0.0557276	0.148645
HMDB0256083	C01742	Palatinose	Inf	0.0563145	0.149285
HMDB0001262	C01835	Maltotriose	Inf	0.0563145	0.149285
NA	NA	Apiopaenoside	Inf	0.0563145	0.149285
NA	NA	6-Chloro-3-[4-(2-Hydroxyethyl)Piperazinyl-4-Phenylhydroquinolin-2-One	3.59977	0.0566099	0.149761
HMDB0002580	C03642	Taurolithocholate Sulfate	7.41391	0.0572667	0.150823
NA	NA	N6-Benzyl-9H-Purine-2,6-Diamine	7.04586	0.0572667	0.150823
HMDB0001554	C00655	Xanthylic Acid	0.123202	0.0575955	0.150823
HMDB0060656	C16561	Monoethylglycinexylidide	6.81954	0.0575955	0.150823
NA	NA	3-(6,7-Dimethoxy-1,2,3,4-Tetrahydroisoquinolin-1-Yl)Propan-1-Ol	2.13125	0.0575955	0.150823
HMDB0000021	C02515	3-Iodotyrosine	Inf	0.0606856	0.158593
HMDB0248668	NA	Asperulosidic Acid	27.7614	0.0641128	0.166866
NA	NA	5-(4-Carboxy-3-Methylbutyl)-5,6,8A-Trimethyl-3-Oxo-4A,6,7,8-Tetrahydro-4H-Naphthalene-1-Carboxylic Acid	4.04417	0.0641128	0.166866
NA	NA	Trichophycin B	2.88226	0.0666959	0.166866
NA	NA	(2E,6E)-3,7,11,15,19,23,27,31,35-Nonamethylhexatriaconta-2,6,34-Triene-1,10,11,15,19,23,27,31-Octol	7.7646	0.0666959	0.166866
NA	NA	6-O-(4-Hydroxycinnamoyl)-Beta-D-Glucopyranose 1,2-Bis(3,4,5-Trihydroxybenzoate)	6.37516	0.0685465	0.166866
HMDB0245544	NA	2,3-Dideoxyadenosine	3.19725	0.0685465	0.166866
HMDB0028934	NA	Leucyl-Lysine	4.43451	0.0697825	0.166866
HMDB0000331	C01921	3A,7B,12A-Trihydroxyoxocholanyl-Glycine	4.29897	0.0697825	0.166866
NA	NA	1-(2-Hydroxyethyl)-2,2,6,6-Tetramethyl-4-Hydroxypiperidine	9.2715	0.0697825	0.166866
HMDB0000299	C01762	Xanthosine	6.63426	0.0700034	0.166866
HMDB0304792	NA	Valylarginine	2.94312	0.0700034	0.166866
HMDB0013312	NA	Trans-3-Octenedioic Acid	1.08471	0.0700034	0.166866
HMDB0029069	NA	Thr-Pro	2.53639	0.0700034	0.166866
HMDB0029052	NA	Ser-Val	3.57122	0.0700034	0.166866
HMDB0245113	C07499	Phenylethylmalonamide	2.06435	0.0700034	0.166866
HMDB0000214	C00077	Ornithine	1.76386	0.0700034	0.166866
HMDB0255504	D08258	Nefopam	3.64957	0.0700034	0.166866
HMDB0030386	C10160	Myosmine	1.47342	0.0700034	0.166866
HMDB0000355	C03761	Meglutol	1.53147	0.0700034	0.166866
HMDB0028901	NA	Isoleucyl-Arginine	2.35555	0.0700034	0.166866
NA	NA	Isoevernic Acid	3.0477	0.0700034	0.166866
HMDB0001190	C00637	Indole-3-Acetaldehyde	0.555519	0.0700034	0.166866
HMDB0000738	C00463	Indole	1.35552	0.0700034	0.166866
HMDB0006961	C05235	Hydroxyacetone	0.451333	0.0700034	0.166866
NA	NA	Homopterocarpin	0.482955	0.0700034	0.166866
HMDB0000086	C00670	Glycerol-3-Phosphocholine	4.37171	0.0700034	0.166866
HMDB0006355	C02670	Glucurolactone	1.5711	0.0700034	0.166866
HMDB0000439	NA	Furoylglycine	2.18951	0.0700034	0.166866
HMDB0000014	C00881	Deoxycytidine	6.40974	0.0700034	0.166866
HMDB0001202	C00239	dCMP	4.00762	0.0700034	0.166866
HMDB0000191	C00049	Aspartic Acid	1.7641	0.0700034	0.166866
HMDB0000019	C00141	Alpha-Ketoisovalerate	2.18961	0.0700034	0.166866
HMDB0240264	C01297	6-Hydroxypseudooxynicotine	3.01179	0.0700034	0.166866
NA	NA	4-Methyl-11-(4-Sulfophenyl)Tridecanoic Acid	1.54322	0.0700034	0.166866
NA	NA	2-Methoxy-6-[(Triphenylmethoxy)Methyl-2H-3,4,5,6-Tetrahydropyran-3,4,5-Triol	1.91504	0.0700034	0.166866
HMDB0001987	NA	2-Hydroxy-2-Methylbutyric Acid	2.14214	0.0700034	0.166866
HMDB0001031	C00673	2-Deoxy-D-Ribose 5-Phosphate	3.26932	0.0700034	0.166866
HMDB0001906	C03665	2-Aminoisobutyric Acid	3.81021	0.0700034	0.166866
NA	NA	2-(Acetylamino)-N-Cyclopropyl-3-Indol-3-Ylpropanamide	4.29683	0.0700034	0.166866
NA	NA	2-(4-Amino-4-Carboxybutanamido)-4-Methylpentanoic Acid	3.20935	0.0700034	0.166866
HMDB0028902	NA	2-(2-Amino-3-Methylpentanamido)-3-Carbamoylpropanoic Acid	2.27714	0.0700034	0.166866
HMDB0032619	C07112	1-Phenylethanol	0.417551	0.0700034	0.166866
HMDB0031507	NA	1-Hydroxy-2-Butanone	2.21606	0.0700034	0.166866
HMDB0244733	NA	1H-Indene-1,2(3H)-Dione	2.78175	0.0700034	0.166866
NA	NA	14-(Hydroxyethyl)-2,15-Dimethyltetracyclo[8.7.0.0<2,7.0<11,15Heptadec-7-En- 5-Yl Acetate	5.22417	0.0700034	0.166866
NA	NA	(2-Isobutyrylamino-Acetylamino)-Acetic Acid	6.55732	0.0700034	0.166866
HMDB0242328	NA	(1R,3R)-1-Aminocyclopentane-1,3-Dicarboxylic Acid	0.49139	0.0700034	0.166866
HMDB0005038	C07572	Citalopram	Inf	0.0701846	0.166866
NA	NA	Alpha-Maltotriose	Inf	0.0701846	0.166866
HMDB0042004	C00296	Quinaldine	3.85888	0.0705249	0.16706
HMDB0014382	C07827	Butabarbital	5.65331	0.0705249	0.16706
NA	NA	1-(2-(2H,3H-Benzo[3,4-E1,4-Dioxin-6-Yl)-2-Oxoethyl)Benzimidazole-2-Carbonitri Le	0	0.0739861	0.174938
NA	NA	Corynoxine	12.0177	0.0790114	0.184798
HMDB0000807	C00597	3-Phosphoglyceric Acid	7.37238	0.0790114	0.184798
HMDB0243890	C13903	1-O-Hexadecyl-Sn-Glycero-3-Phosphocholine	9.4591	0.0790114	0.184798
HMDB0060101	NA	12 Hydroxy Arachidonic Acid	14.6716	0.0790114	0.184798
HMDB0029082	NA	Trp-Glu	4.04579	0.081915	0.184798
NA	NA	N-(9-Oxodecyl)Acetamide	4.99776	0.081915	0.184798
HMDB0000905	C00360	2-Deoxy-5-Adenosine Monophosphate	2.20417	0.081915	0.184798
NA	NA	[(2S,3S,4R,5R,6R)-5-Acetyloxy-3-Hydroxy-2-Methyl-6-[[(2R,3S,4S,5R,6S)-3,4,5-Trihydroxy-6-[5-Hydroxy-6-Methoxy-2-(4-Methoxyphenyl)-4-Oxochromen-7-YlOxyoxan-2-YlMethoxyOxan-4-Yl Acetate	Inf	0.0819782	0.184798
HMDB0061643	NA	3-Carboxy-4-Methyl-5-Pentyl-2-Furanpropanoic Acid	3.80619	0.0839896	0.184798
NA	NA	1-Isopropyl-1,2,3,4,-Tetrahydro-Beta-Carboline-3-Carboxylic Acid	2.11048	0.0839896	0.184798
NA	NA	Methyl 7-Deshydroxypyrogallin-4-Carboxylate	4.23033	0.0853726	0.184798
HMDB0254871	NA	Monopropionylcadaverine	2.91517	0.0862023	0.184798
NA	NA	6-(N-{2-[2-Methyl-5-(Trifluoromethoxy)Indol-3-YlEthyl}Carbamoyl)Cyclohex-3-En Ecarboxylic Acid	2.63372	0.0862023	0.184798
NA	NA	(3,4-Dimethoxyphenyl)-N-[4-(Cyanomethyl)PhenylCarboxamide	2.16359	0.0862023	0.184798
HMDB0028993	NA	Phe-Gln	2.4721	0.0866171	0.184798
HMDB0029140	NA	Valylvaline	3.34699	0.0870313	0.184798
HMDB0034146	C13846	Stearic Acid Amide	1.35475	0.0870313	0.184798
NA	NA	Psicose	4.49538	0.0870313	0.184798
HMDB0029015	NA	Pro-Gln	5.78759	0.0870313	0.184798
HMDB0029005	NA	Phe-Thr	2.36305	0.0870313	0.184798
HMDB0000482	C06423	Octanoic Acid	0.719891	0.0870313	0.184798
HMDB0001645	C01933	Norleucine	3.97516	0.0870313	0.184798
NA	NA	N-(2-Ethylphenyl)-2-(9-Methyl-6-Oxohydropurin-8-Ylthio)Acetamide	0.638752	0.0870313	0.184798
HMDB0002284	NA	Monoacetylcadaverine	2.08989	0.0870313	0.184798
HMDB0301734	NA	Methoxyphenylacetic Acid	2.29756	0.0870313	0.184798
HMDB0000182	C00047	Lysine	2.43991	0.0870313	0.184798
HMDB0000172	C00407	L-Isoleucine	3.69528	0.0870313	0.184798
HMDB0014426	C07073	Lidocaine	0.00274789	0.0870313	0.184798
HMDB0028939	NA	Leu-Thr	2.40429	0.0870313	0.184798
HMDB0028927	NA	Leucyl-Glutamine	2.0547	0.0870313	0.184798
HMDB0028900	NA	Isoleucyl-Alanine	10.7525	0.0870313	0.184798
HMDB0000333	NA	Isohomovanillic Acid	6.03183	0.0870313	0.184798
HMDB0000175	C00130	IMP	3.12191	0.0870313	0.184798
HMDB0002271	C20522	Imidazolepropionic Acid	1.79843	0.0870313	0.184798
HMDB0028854	NA	Glycylvaline	4.2274	0.0870313	0.184798
HMDB0000759	C02155	Glycylleucine	1.56745	0.0870313	0.184798
HMDB0242115	NA	Glyceryl Monolinoleate	0.509115	0.0870313	0.184798
HMDB0000148	C00025	Glutamic Acid	3.1129	0.0870313	0.184798
HMDB0029521	C10044	Galangin	3.44714	0.0870313	0.184798
HMDB0031407	C00557	Cyclopentanone	0.521637	0.0870313	0.184798
NA	C18573	Cyazofamid	22.5521	0.0870313	0.184798
NA	NA	Crocacin C	3.27613	0.0870313	0.184798
HMDB0004701	C14825	Coronaric Acid	1.35879	0.0870313	0.184798
HMDB0060441	C05340	Beta-Alanyl-L-Arginine	2.58686	0.0870313	0.184798
HMDB0032929	C14512	Benzofuran	2.78151	0.0870313	0.184798
HMDB0014352	C06838	Azithromycin	1.70636	0.0870313	0.184798
HMDB0302107	C19620	9,10-Epoxy-18-Hydroxy-Octadecanoic Acid	1.45242	0.0870313	0.184798
HMDB0001161	C01181	4-Trimethylammoniobutanoate	2.20567	0.0870313	0.184798
HMDB0011718	C00633	4-Hydroxybenzaldehyde	2.47725	0.0870313	0.184798
HMDB0061189	NA	3-Hydroxyisovalerylcarnitine	2.11068	0.0870313	0.184798
HMDB0061112	NA	3-Carboxy-4-Methyl-5-Propyl-2-Furanpropionic Acid	3.54195	0.0870313	0.184798
HMDB0032918	NA	3-(2-Furanyl)-2-Propenal	1.24026	0.0870313	0.184798
HMDB0247125	NA	2-Pyrazinoylguanidine	2.22765	0.0870313	0.184798
HMDB0255446	C16202	2-Naphthalenesulfonic Acid	0.669332	0.0870313	0.184798
NA	NA	2-Hydroxy-2-[2-Oxo-2-[(4,7,7-Trimethyl-3-Bicyclo[2.2.1Heptanyl)OxyEthylButanedioic Acid	1.45917	0.0870313	0.184798
NA	NA	2,3-Dideoxyuridine	0.728425	0.0870313	0.184798
NA	NA	2,3,3,4,4,4-Hexafluorobutanoic Acid	0.185342	0.0870313	0.184798
NA	NA	2-(4,5-Dibromo-6-Hydroxy-3-Oxoxanthen-9-Yl)Benzoic Acid	3.02971	0.0870313	0.184798
HMDB0002287	NA	2(3H)-Thiophenone, 3-Aminodihydro-, (S)-	2.92325	0.0870313	0.184798
HMDB0010382	C04102	1-Palmitoyl-Sn-Glycero-3-Phosphocholine	3.2265	0.0870313	0.184798
HMDB0036057	NA	1H-Pyrrole-2-Carboxaldehyde	2.54297	0.0870313	0.184798
HMDB0240628	NA	1-Carboxyethylphenylalanine	2.30842	0.0870313	0.184798
NA	NA	Sarcinaxanthin Monoglucoside	3.51204	0.0966115	0.2038
HMDB0014363	C07663	Moxifloxacin	64.4862	0.0966115	0.2038
HMDB0030746	NA	5,7-Dihydroxy-2-(3-Hydroxy-4-Methoxyphenyl)-3,4-Dihydro-2H-1-Benzopyran-4-One	8.95561	0.0966115	0.2038
NA	NA	(2S)-2-[(Tert-Butoxy)Carbonylamino-3-[BenzyloxycarbonylPropanoic Acid	3.06252	0.0966115	0.2038
NA	NA	Spiculisporic Acid	4.9453	0.099837	0.21026
HMDB0000098	C00181	Xyloside	2.55602	0.102136	0.214751
HMDB0011756	C02710	N-Acetylleucine	12.7351	0.103665	0.215795
HMDB0010379	C04230	(2-{[(2R)-2-Hydroxy-3-(Tetradecanoyloxy)Propyl PhosphonatoOxy}Ethyl)Trimethylazanium	2.74923	0.103665	0.215795
HMDB0028940	NA	Leu-Trp	2.14128	0.104582	0.215795
HMDB0001965	C14811	Troxilin B3	3.16085	0.10504	0.215795
HMDB0251975	C06522	Strychnine	3.95548	0.10504	0.215795
HMDB0014989	C06936	Dacarbazine	4.25724	0.10504	0.215795
HMDB0246113	NA	3,5-Dideoxythymidine	4.08844	0.10504	0.215795
HMDB0029118	NA	Tyr-Val	3.33121	0.106811	0.215795
HMDB0000907	NA	Sulfolithocholic Acid	6.67689	0.106811	0.215795
HMDB0001257	C00315	Spermidine	2.67968	0.106811	0.215795
HMDB0000857	C02656	Pimelic Acid	1.74437	0.106811	0.215795
NA	NA	Phenyl Hexopyranoside	1.588	0.106811	0.215795
HMDB0000766	NA	N-Acetylalanine	1.63918	0.106811	0.215795
HMDB0000156	C00149	Malic Acid	1.8397	0.106811	0.215795
HMDB0000177	C00135	Histidine	4.53985	0.106811	0.215795
HMDB0028848	NA	Glycyl-L-Phenylalanine	1.99065	0.106811	0.215795
HMDB0000128	C00581	Glycocyamine	0.212176	0.106811	0.215795
HMDB0033840	NA	Dihydro-5-Methyl-2(3H)-Furanone	1.16854	0.106811	0.215795
HMDB0014405	C08057	Cycloserine	2.17665	0.106811	0.215795
HMDB0247095	NA	6-N-Propyluracil	1.80017	0.106811	0.215795
HMDB0037776	NA	5,9:6,9-Diepoxy-3-Megastigmene	0.776399	0.106811	0.215795
NA	NA	2-[6-Hydroxy-2-(4-Hydroxy-3-Methoxyphenyl)-3-Azabicyclo[4.4.0Dec-3-Yl-N-(4-M Ethylphenyl)Acetamide	5.76024	0.106811	0.215795
NA	NA	2,7-Naphthalenedisulfonic Acid	2.67619	0.106811	0.215795
NA	NA	2-(Carbamimidoylsulfanyl)Ethanesulfonic Acid	0.604334	0.106811	0.215795
HMDB0028738	NA	2-(2-Amino-3-Carbamoylpropanamido)-3-Phenylpropanoic Acid	2.29874	0.106811	0.215795
HMDB0003045	C05570	Ergothioneine	2.83925	0.117216	0.236448
HMDB0243972	NA	1-Nonadecanoyl-Glycero-3-Phosphoserine	0.113506	0.120756	0.243208
HMDB0240261	NA	LPI(18:0)	6.43019	0.123272	0.247504
HMDB0002815	C03916	1-(9Z-Octadecenoyl)-Sn-Glycero-3-Phosphocholine	6.41828	0.123272	0.247504
NA	NA	2(1H)-Azulenone, 6-(Beta-D-Glucopyranosyloxy)-4,5,6,7,8,8A-Hexahydro-5-Hydroxy-5-(1-Hydroxy-1-Methylethyl)-3,8-Dimethyl-	5.90403	0.125945	0.249105
NA	NA	(R)-N-Acetyl-4-Naphthylalanine	1.94185	0.125945	0.249105
HMDB0240655	NA	O-Cresol Sulfate	35.6348	0.126445	0.249105
HMDB0011180	NA	Prolylproline	2.90711	0.129859	0.249105
HMDB0000070	C00408	Pipecolic Acid	1.76046	0.129859	0.249105
HMDB0304787	NA	Phenylalanylalanine	2.87192	0.129859	0.249105
HMDB0032805	NA	N-Feruloyloctopamine	1.81082	0.129859	0.249105
HMDB0061684	NA	N-Acetylisoleucine	1.44701	0.129859	0.249105
HMDB0240345	NA	N2,N5-Diacetylornithine	5.06076	0.129859	0.249105
HMDB0258416	NA	Mycotoxin F2;Toxin F2	0.380764	0.129859	0.249105
HMDB0028964	NA	Lysylvaline	2.47225	0.129859	0.249105
HMDB0010384	C04230	LPC(18:0)	10.7306	0.129859	0.249105
HMDB0028922	NA	Leucyl-Alanine	1.6259	0.129859	0.249105
HMDB0028916	NA	Isoleucylserine	2.56203	0.129859	0.249105
HMDB0028903	NA	Isoleucylaspartate	1.81367	0.129859	0.249105
HMDB0252931	C08901	Gracillin	4.43035	0.129859	0.249105
HMDB0000131	C00116	Glycerol	0.317621	0.129859	0.249105
HMDB0000212	C01074	Galnac	1.8229	0.129859	0.249105
NA	NA	Descladinose Azithromycin	1.95878	0.129859	0.249105
NA	NA	Anabasamine	3.06447	0.129859	0.249105
HMDB0243703	NA	Alpha-Methyl-4-Carboxyphenylglycine	2.93365	0.129859	0.249105
NA	NA	Alanylnorvaline	2.61084	0.129859	0.249105
HMDB0247909	NA	Acetoacetaldehyde	1.32526	0.129859	0.249105
HMDB0247457	NA	8-Oxo-7,8-Dihydrodeoxyguanine	0.619682	0.129859	0.249105
HMDB0013127	NA	3-Hydroxybutyrylcarnitine	2.79844	0.129859	0.249105
HMDB0245149	NA	2-Hydroxyacetamide	0.475358	0.129859	0.249105
HMDB0038055	NA	2-Hydroxy-7-Methoxy-2H-1,4-Benzoxazin-3(4H)-One	1.43499	0.129859	0.249105
HMDB0028844	NA	2-(2-Aminoacetamido)-3-Methylpentanoic Acid	2.14658	0.129859	0.249105
NA	NA	(Z)-3-(4-Hydroxyphenyl)-N-[4-[[(E)-3-(4-Hydroxyphenyl)Prop-2-EnoylAminoButylProp-2-Enamide	1.83043	0.129859	0.249105
HMDB0036998	NA	(S)-Oleuropeic Acid	2.42677	0.129859	0.249105
NA	NA	(4S,5Z,6S)-4-(2-Methoxy-2-Oxoethyl)-5-[2-[(E)-3-Phenylprop-2-EnoylOxyethylidene-6-[(2S,3R,4S,5S,6R)-3,4,5-Trihydroxy-6-(Hydroxymethyl)Oxan-2-YlOxy-4H-Pyran-3-Carboxylic Acid	13.1611	0.141123	0.270312
HMDB0000362	NA	2-Phosphoglycerate	2.51025	0.144959	0.277247
HMDB0248216	NA	Beta-Gentiobiose	Inf	0.146615	0.279586
NA	NA	(2R,4S,5R)-4-[(2S,4S,5R)-4-[(2S,4S,5R)-4-[(2S,4S,5R)-3,5-Dihydroxy-6-(Hydroxymethyl)-4-[(2S,4R,5S)-3,4,5-Trihydroxy-6-(Hydroxymethyl)Oxan-2-YlOxyoxan-2-YlOxy-3,5-Dihydroxy-6-(Hydroxymethyl)Oxan-2-YlOxy-3,5-Dihydroxy-6-(Hydroxymethyl)Oxan-2-YlOxy-6-(Hydroxymethyl)Oxane-2,3,5-Triol	Inf	0.146615	0.279586
NA	NA	(Z)-9,12,13-Trihydroxyoctadec-15-Enoic Acid	2.96589	0.147679	0.280787
NA	NA	(2R)-2-((2S,3R)-3-Methyl-2-((7S)-5-Oxo-7,8,13,13B-Tetrahydro-5H-Benzo[1,2Indolizino[8,7-BIndole-7-Carboxamido)Pentanamido)Propanoic Acid	13.7695	0.147679	0.280787
HMDB0006351	NA	Vaccenyl Carnitine	Inf	0.148723	0.282356
HMDB0028721	NA	Arginyltyrosine	3.66345	0.149484	0.283383
NA	NA	Carpachromene	5.9131	0.150563	0.283661
NA	NA	Isoprenylhydroquinone Glucoside	1.98811	0.151102	0.283661
NA	NA	1-(2,3-Dibenzimidazol-2-Ylpropyl)-2-Methoxybenzene	2.44614	0.151102	0.283661
HMDB0031087	NA	Trans-2-Hexyl-1-Cyclopropaneacetic Acid	1.71899	0.156003	0.283661
HMDB0000262	C00178	Thymine	1.42769	0.156003	0.283661
NA	NA	Pyroglu-Pro	1.4899	0.156003	0.283661
HMDB0001271	C01168	Pseudouridine 5-Phosphate	1.60357	0.156003	0.283661
HMDB0304788	NA	Phenylalanyl-Glycine	1.69627	0.156003	0.283661
HMDB0000159	C00079	Phenylalanine	2.13121	0.156003	0.283661
NA	NA	PFSA-Cl	1.21499	0.156003	0.283661
HMDB0002005	C02989	Methionine Sulfoxide	1.36462	0.156003	0.283661
NA	NA	Lauramine Oxide	0.502035	0.156003	0.283661
NA	NA	Hydroxysuberic Acid	1.30804	0.156003	0.283661
HMDB0242615	C10696	Hydroquinidine	3.44356	0.156003	0.283661
HMDB0028898	NA	Histidylvaline	1.77982	0.156003	0.283661
HMDB0014344	C01912	Erythromycin	1.95106	0.156003	0.283661
HMDB0037115	NA	Desmeninol	1.46193	0.156003	0.283661
NA	NA	Capric Dimethyl Amine Oxide	0.587895	0.156003	0.283661
HMDB0000784	C08261	Azelaic Acid	0.730844	0.156003	0.283661
HMDB0028700	NA	Alanylvaline	2.72537	0.156003	0.283661
HMDB0061655	NA	3-Hydroxytridecanoic Acid	0.756323	0.156003	0.283661
HMDB0029171	NA	3-Hydroxyadipic Acid 3,6-Lactone	1.24313	0.156003	0.283661
NA	NA	3-Hydroxy-1,5-Diphenyl-1-Pentanone	8.66427	0.156003	0.283661
HMDB0059729	NA	3,4-Methylenesebacic Acid	1.14244	0.156003	0.283661
HMDB0061888	C14447	2-Methylpyridine	0.348459	0.156003	0.283661
NA	NA	2-{[(4-Methylphenyl)SulfonylAmino}-4-Methylthiobutanoic Acid	2.08685	0.156003	0.283661
HMDB0245496	NA	2,5-Dihydro-1H-Pyrrole-2-Carboxylic Acid	1.38354	0.156003	0.283661
NA	NA	2-((7-Acetamido-1,2,3-Trimethoxy-9-Oxo-5,6,7,9-Tetrahydrobenzo[AHeptalen-10-Yl)Amino)-N-(3-(3,4-Dimethoxyphenethyl)-1H-1,2,4-Triazol-5-Yl)-4-(Methylthio)Butanamide	5.32347	0.156003	0.283661
HMDB0003331	C02494	1-Methyladenosine	2.66067	0.156003	0.283661
HMDB0000397	C00196	Dihydroxy-Benzoic Acid	Inf	0.160713	0.291814
NA	NA	Ethyl 3-{N-[2-(N-Phenylcarbamoyl)PhenylCarbamoyl}Propanoate	Inf	0.164136	0.297612
HMDB0014936	C11334	Gentamicin Sulfate	14.9742	0.168612	0.305299
HMDB0246655	NA	2,3,3-Trimethylbenzoindolenine	3.26892	0.172714	0.312289
NA	NA	3-[(2S,3R,4S,5R,6R)-4-[(2S,3R,4S,5S,6R)-4,5-Dihydroxy-6-(Hydroxymethyl)-3-[(2S,3R,4S,5R)-3,4,5-Trihydroxyoxan-2-YlOxyoxan-2-YlOxy-3,5-Dihydroxy-6-(Hydroxymethyl)Oxan-2-YlOxy-2-(3,4-Dihydroxyphenyl)-5,7-Dihydroxychromen-4-One	3.11278	0.175618	0.317094
HMDB0014623	D04687	Lenalidomide	1.99338	0.177541	0.319672
NA	NA	2,4-Dihydroxy-5-Methoxy-2A,5A,7-Trimethyldodecahydrodispiro[Furan-3,2-Furan-5,6-Naphtho[1,8-BcFuran-2(2AH)-One	4.06107	0.177541	0.319672
NA	NA	Isoleucyl-Isoleucyl-Lysine	2.83864	0.17869	0.320904
HMDB0259784	C08252	Verbascose	3.69178	0.179263	0.320904
HMDB0029065	NA	Thr-Leu	2.57052	0.185931	0.320904
HMDB0011757	NA	N-Acetylvaline	1.21879	0.185931	0.320904
HMDB0000512	C03519	N-Acetylphenylalanine	1.63846	0.185931	0.320904
HMDB0013248	C03343	Mono-(2-Ethylhexyl)Phthalate	0.836437	0.185931	0.320904
HMDB0028986	NA	Met-Val	2.86188	0.185931	0.320904
HMDB0011174	NA	Isoleucylproline	1.55168	0.185931	0.320904
HMDB0029737	C08493	Indole-3-Carbaldehyde	1.55839	0.185931	0.320904
HMDB0000734	C21283	Indole-3-Acrylic Acid	2.09648	0.185931	0.320904
HMDB0000714	C01586	Hippuric Acid	0.841301	0.185931	0.320904
HMDB0000125	C00051	Glutathione (Reduced)	0.46962	0.185931	0.320904
HMDB0094691	C17602	Furanone A	1.38244	0.185931	0.320904
HMDB0005030	C06999	Fexofenadine	3.72198	0.185931	0.320904
HMDB0005960	NA	D-Pipecolic acid	1.35055	0.185931	0.320904
NA	NA	Dimethyl Myristamine	0.543278	0.185931	0.320904
HMDB0003407	C00741	Diacetyl	0.564597	0.185931	0.320904
HMDB0000564	C00157	Colfosceril Palmitate	3.31903	0.185931	0.320904
HMDB0000094	C00158	Citric Acid	1.28844	0.185931	0.320904
HMDB0240712	C14216	Bisphenol S	0.69552	0.185931	0.320904
HMDB0015554	D07440	Alverine	0.705199	0.185931	0.320904
HMDB0247450	NA	8-Methylquinoline	1.94467	0.185931	0.320904
HMDB0039664	NA	7-Ethyl-2,3,6,7-Tetrahydrocyclopent[BAzepin-8(1H)-One	0.664069	0.185931	0.320904
HMDB0252077	NA	6-Oxo-Butanal	1.76001	0.185931	0.320904
NA	NA	6-(Diaminomethylideneamino)-2-[[(4E,6E,12E,14E)-3-Hydroxy-2-(Hydroxymethyl)-8,10,16-Trimethyloctadeca-4,6,12,14-TetraenoylAminoHexanoic Acid	0.781059	0.185931	0.320904
HMDB0002894	C02376	5-Methylcytosine	0.790633	0.185931	0.320904
HMDB0246561	C01877	4-Oxo-L-Proline	1.34213	0.185931	0.320904
HMDB0038949	NA	3Beta,6Beta-Dihydroxynortropane	1.57669	0.185931	0.320904
HMDB0244082	NA	1,2-Dimethylimidazole	1.67643	0.185931	0.320904
HMDB0062585	C04281	(3R,5S)-1-Pyrroline-3-Hydroxy-5-Carboxylic Acid	1.3586	0.185931	0.320904
NA	NA	(2E)-3-[5-(3,4-Dichlorophenyl)(2-Furyl)-2-(2-1,2,3,4-Tetrahydroisoquinolylcar Bonyl)Prop-2-Enenitrile	1.33507	0.185931	0.320904
HMDB0250581	C08797	Cucurbitacin E	Inf	0.194076	0.334515
NA	NA	8-[2-(3,4-Dihydroxy-2,5-Dimethoxyoxolan-3-Yl)Ethyl-4A,7,8-Trimethylspiro[2,3,5,6,7,8A-Hexahydro-1H-Naphthalene-4,2-Oxirane-2,3-Diol	1.24967	0.199936	0.344156
NA	NA	[(2R,3S,4S,5R,6S)-3,4,5-Trihydroxy-6-[(2S,3R,4S,5S,6R)-3,4,5-Trihydroxy-6-(Hydroxymethyl)Oxan-2-YlOxyoxan-2-YlMethyl 8-Methylnonanoate	4.5738	0.204264	0.351138
NA	NA	1,5-Dibutyl-3,6-Dihydro-2H-Pyridine	4.00103	0.207321	0.355919
HMDB0000446	C12989	N-Alpha-Acetyl-L-Lysine	5.80858	0.209343	0.358913
HMDB0257214	NA	6-(Gamma,Gamma-Dimethylallylamino)Purine Riboside	2.0682	0.21055	0.359738
NA	NA	Teraspiridole C	1.19338	0.211151	0.359738
NA	NA	N-(4-Fluorophenyl)-2-(4-Hydroxyquinazolin-2-Ylthio)Acetamide	0.206752	0.211151	0.359738
NA	NA	10,11-Dimethoxy-4A,5,5A,7,8,13A,15,15A,15B,16-Decahydro-2H-4,6-Methanoindolo[3,2,1-IjOxepino[2,3,4-DePyrrolo[2,3-HQuinoline-14-One	2.60891	0.211151	0.359738
HMDB0041974	C02575	Pentachlorophenol	0.712017	0.219298	0.359738
HMDB0013716	C01826	Norvaline	1.58503	0.219298	0.359738
HMDB0000812	C01042	N-Acetylaspartic Acid	1.3966	0.219298	0.359738
HMDB0028955	NA	Lys-Leu	2.14214	0.219298	0.359738
HMDB0240262	NA	LPC(16:0)	1.56164	0.219298	0.359738
HMDB0003466	C01040	L-Gulonolactone	4.07963	0.219298	0.359738
HMDB0028942	NA	Leu-Val	2.77855	0.219298	0.359738
HMDB0253801	NA	Kinetin Riboside	1.138	0.219298	0.359738
HMDB0000671	C02043	Indole-3-Lactic Acid	2.2366	0.219298	0.359738
HMDB0028893	NA	Histidylproline	1.87547	0.219298	0.359738
HMDB0000721	NA	Glycylproline	1.41449	0.219298	0.359738
HMDB0252399	C10967	Fluperlapine	1.84695	0.219298	0.359738
HMDB0006548	C10858	Ecgonine	0.724292	0.219298	0.359738
HMDB0000163	C00208	D-Maltose	2.42986	0.219298	0.359738
NA	C09943	Dendrobine	1.4314	0.219298	0.359738
HMDB0036213	NA	Cis-3-Hexenyl Lactate	0.642202	0.219298	0.359738
HMDB0038631	C21721	Camalexin	1.81705	0.219298	0.359738
NA	NA	Benzothiazole-2-Sulfonic Acid	1.40976	0.219298	0.359738
HMDB0001870	C00180	Benzoic Acid	0.740382	0.219298	0.359738
NA	NA	8-Bromo-6-Chloro-3-(4-Hydroxyphenyl)-4-Methylchromen-2-One	1.30053	0.219298	0.359738
HMDB0006955	C04604	3-Hydroxy-2-Methylpyridine-4,5-Dicarboxylate	1.20704	0.219298	0.359738
HMDB0034889	NA	3Alpha,4,7,7Alpha-Tetrahydro-4-Hydroxy-1H-Isoindole-1,3(2H)-Dione	0.760299	0.219298	0.359738
HMDB0245025	NA	2-Aminopurine	1.09711	0.219298	0.359738
HMDB0029083	NA	2-[2-Amino-3-(1H-Indol-3-Yl)PropanamidoAcetic Acid	2.32956	0.219298	0.359738
NA	NA	2-(2-Amino-3-Phenylpropanamido)-3-Methylbutanoic Acid	1.69377	0.219298	0.359738
NA	NA	16-Butan-2-Yl-10,11,14-Trimethyl-13-Propan-2-Yl-3-Prop-2-Enyl-4-Oxa-1,8,11,14,17-Pentazabicyclo[17.3.0Docosane-2,5,9,12,15,18-Hexone	0.665033	0.219298	0.359738
HMDB0040611	NA	(9R,10S,12Z)-9,10-Dihydroxy-8-Oxo-12-Octadecenoic Acid	1.64443	0.219298	0.359738
NA	NA	(3R,4R,6S,6As,8R,9R,10S,11S,11Ar,12R,13R)-11A-Acetoxy-4-(2-Chloroacetoxy)-1-Ethyl-9,11-Dihydroxy-6,10,13-Trimethoxy-3-(Methoxymethyl)Tetradecahydro-1H-3,6A,12-(Epiethane[1,1,2Triyl)-7,9-Methanonaphtho[2,3-BAzocin-8-Yl Benzoate	2.04125	0.219298	0.359738
NA	NA	(10R,13S)-17-((Z)-5,5-Diphenylpenta-2,4-Dien-2-Yl)-10,13-Dimethyl-2,3,4,7,8,9,10,11,12,13,14,15,16,17-Tetradecahydro-1H-Cyclopenta[APhenanthren-3-Ol	0.940508	0.219298	0.359738
NA	NA	(+)-Aspermytin A	0.6626	0.219298	0.359738
HMDB0001491	C00018	Pyridoxal Phosphate	65.765	0.221157	0.362327
HMDB0003252	C05963	Thromboxane B2	0.864834	0.239811	0.39239
HMDB0033705	NA	Salviaflaside	1.66158	0.242983	0.397078
NA	NA	[(2R,3S,4S,5R,6R)-6-[1,7-Bis(4-Hydroxyphenyl)-5-Oxoheptan-3-YlOxy-3,4,5-Trihydroxyoxan-2-YlMethyl (E)-3-(4-Hydroxyphenyl)Prop-2-Enoate	1.12845	0.245079	0.398675
NA	NA	Rhodojaponin II	2.29431	0.24633	0.398675
NA	NA	Methylethyl 6-(3-Bromo-4-Hydroxy-5-Methoxyphenyl)-3-Ethyl-4-Methyl-2-Oxo-1,3,6 -Trihydropyrimidine-5-Carboxylate	6.00649	0.24633	0.398675
HMDB0034737	NA	Notoginsenoside Fe	0.491156	0.246953	0.398675
NA	NA	N-[3,5-Dimethyl-4-(2-Morpholin-4-Yl-2-Oxoethoxy)Phenyl(3,4,5-Trimethoxyphenyl )Carboxamide	1.59936	0.246953	0.398675
HMDB0011152	NA	LPE(P-16:0)	2.12477	0.246953	0.398675
HMDB0001877	C07185	Valproic Acid	0.513016	0.256622	0.398675
HMDB0029130	NA	Val-Ile	2.06747	0.256622	0.398675
NA	NA	Trifluoromethanesulfonic Acid	1.123	0.256622	0.398675
HMDB0000933	C16308	Traumatic Acid	1.19738	0.256622	0.398675
HMDB0029011	NA	Prolylarginine	2.47102	0.256622	0.398675
HMDB0001429	C00009	Phosphoric Acid	1.33804	0.256622	0.398675
HMDB0060015	C00850	Phenylsulfate	1.77511	0.256622	0.398675
HMDB0040733	C00548	Phenyl Acetate	0.606332	0.256622	0.398675
HMDB0001488	C00253	Niacin	0.961384	0.256622	0.398675
HMDB0000190	C00186	Lactic Acid	1.81451	0.256622	0.398675
HMDB0005768	C02993	Kyotorphin	1.93056	0.256622	0.398675
HMDB0032923	C14516	Kojic Acid	0.754619	0.256622	0.398675
HMDB0253648	NA	Isoindoline	1.92548	0.256622	0.398675
HMDB0003905	C05130	Imidazole-4-Acetaldehyde	0.735955	0.256622	0.398675
HMDB0002899	C10788	Ellagic Acid	2.73591	0.256622	0.398675
HMDB0250930	C10935	Diethyltoluamide	0.501677	0.256622	0.398675
NA	NA	Dereplicator Identification - Heptaibin	0.728104	0.256622	0.398675
HMDB0031342	C09822	Cyclohexanecarboxylic Acid	1.10775	0.256622	0.398675
HMDB0028694	NA	Alanylphenylalanine	4.01404	0.256622	0.398675
HMDB0000448	C06104	Adipic Acid	0.720556	0.256622	0.398675
HMDB0038692	NA	6-Methyl-2-Methylene-6-Octene-1,3,8-Triol	1.05499	0.256622	0.398675
HMDB0246781	NA	5-Dihydroxyhept-6-Enoic Acid	0.859793	0.256622	0.398675
HMDB0061918	C12312	2-Oxindole	0.7034	0.256622	0.398675
HMDB0240328	NA	2-O-Methyluridine	1.19005	0.256622	0.398675
HMDB0001172	C00349	2-Methyl-3-Oxopropanoic Acid	1.28179	0.256622	0.398675
HMDB0013751	C02502	2-Hydroxypyridine	1.14	0.256622	0.398675
HMDB0031057	NA	2-Hydroxyhexadecanoic Acid	1.48298	0.256622	0.398675
HMDB0031713	NA	2-Hydroxy-4-Imino-2,5-Cyclohexadienone	0.818418	0.256622	0.398675
NA	NA	2-Butanone, 4-[3-(Beta-D-Glucopyranosyloxy)-4-Hydroxy-2,6,6-Trimethyl-1-Cyclohexen-1-Yl-	0.84874	0.256622	0.398675
HMDB0000252	C00319	2-Amino-4-Octadecene-1,3-Diol	1.27218	0.256622	0.398675
NA	NA	2,3-Dihydro-1H-Carbazol-4(9H)-One	1.27866	0.256622	0.398675
HMDB0029886	NA	2-(3,4-Dihydroxyoxolan-2-Yl)-2-Hydroxyethyl (9E)-Octadec-9-Enoate	0.755686	0.256622	0.398675
NA	NA	1,4-Cyclohexanedicarboxylic Acid	0.587335	0.256622	0.398675
NA	NA	[(2R)-1,1,2,3,3-Pentadeuterio-3-Heptadecanoyloxy-2-[(Z)-Tetradec-9-EnoylOxypropyl 2-(Trimethylazaniumyl)Ethyl Phosphate	1.97051	0.256622	0.398675
HMDB0033560	NA	(E)-5-(3,4,5,6-Tetrahydro-3-Pyridylidenemethyl)-2-Furanmethanol	0.716401	0.256622	0.398675
HMDB0252436	C18604	Forchlorfenuron	Inf	0.286407	0.443429
HMDB0003572	C01850	Rosmarinic Acid	0.981824	0.286803	0.443429
HMDB0062181	NA	N-Lactoylvaline	1.64748	0.286803	0.443429
HMDB0062176	NA	N-Lactoylleucine	1.1621	0.286803	0.443429
HMDB0010169	C00550	SM(d18:1/16:0)	1.09064	0.297558	0.447202
HMDB0006344	C04148	Phenylacetylglutamine	1.12129	0.297558	0.447202
HMDB0001186	C02567	N-Acetylspermine	11.5253	0.297558	0.447202
HMDB0011129	NA	LPE(18:0)	2.52349	0.297558	0.447202
HMDB0010385	C04230	LPC(18:1)	3.97414	0.297558	0.447202
HMDB0028941	NA	Leucyl-Tyrosine	1.96023	0.297558	0.447202
NA	NA	Lauryldiethanolamine	0.800322	0.297558	0.447202
HMDB0245221	C18653	DNOC	1.19568	0.297558	0.447202
HMDB0116368	NA	DG(8:0/8:0/0:0)	0.786519	0.297558	0.447202
HMDB0000426	C02612	Citramalic Acid	1.26846	0.297558	0.447202
HMDB0000062	C00487	Carnitine	1.27638	0.297558	0.447202
HMDB0249276	C14350	Bisphenol AF	1.43079	0.297558	0.447202
NA	NA	Benzoylcholine	0.568027	0.297558	0.447202
HMDB0001890	C06809	Acetylcysteine	2.68164	0.297558	0.447202
NA	NA	4-Hydroxy-3-[(4-Hydroxy-2-Oxo-8-Phenyl(3-Hydroquinolyl))(4-Methylthiophenyl)Me Thyl-1-Phenylhydroquinolin-2-One	1.07345	0.297558	0.447202
HMDB0245972	NA	3-Phenylacetylamino-2,6-Piperidinedione	1.91933	0.297558	0.447202
HMDB0061654	NA	3-Hydroxyundecanoic Acid	2.5204	0.297558	0.447202
HMDB0061656	NA	3-Hydroxytetradecanoic Acid	1.08386	0.297558	0.447202
HMDB0000729	C21297	2-Hydroxyisobutyric Acid	1.25979	0.297558	0.447202
HMDB0245345	NA	2,2,6,6-Tetramethylpiperidin-1-Ol	0.78833	0.297558	0.447202
HMDB0007973	C00157	1-Palmitoyl-2-Linoleoyl-Sn-Glycero-3-Phosphocholine	0.116502	0.297558	0.447202
HMDB0003431	C00860	1H-Imidazole-4-Propanol, Beta-Amino-, (S)-	0.649353	0.297558	0.447202
NA	NA	[2-[(Z)-Heptadec-9-EnoylOxy-3-Hexadecanoyloxypropyl 2-(Trimethylazaniumyl)Ethyl Phosphate	0.74023	0.297558	0.447202
NA	NA	(2R,3R,11Bs)-2-[(6,7-Dimethoxy-3,4-Dihydroisoquinolin-1-Yl)Methyl-3-Ethyl-9,10-Dimethoxy-2,3,4,6,7,11B-Hexahydro-1H-Pyrido[2,1-AIsoquinoline	1.26679	0.297558	0.447202
HMDB0000656	C05526	Cysteineglutathione Disulfide	3.287	0.306356	0.45989
HMDB0010407	C04230	(2-{[(2R)-3-[(1Z)-Hexadec-1-En-1-Yloxy-2-Hydroxypropyl PhosphonatoOxy}Ethyl)Trimethylazanium	Inf	0.312479	0.468536
HMDB0000235	C00378	Thiamine	4.88267	0.323453	0.481834
NA	NA	Ziyuglycoside I	1.03602	0.328865	0.481834
NA	NA	8-Methoxycanthin-6-One	1.35392	0.328865	0.481834
HMDB0244510	NA	13-Hydroxyoctadeca-9,12-Dienoic Acid	2.09633	0.328865	0.481834
HMDB0030310	C06536	Harmaline	2.50411	0.330145	0.481834
HMDB0001016	C03492	D-4-Phosphopantothenate	2.53591	0.330145	0.481834
NA	NA	Theaflavin Monogallate A	1.72461	0.330783	0.481834
HMDB0014545	C07699	Nisoldipine	0.601587	0.330783	0.481834
HMDB0039721	C02273	Digalacturonate	0.436577	0.330783	0.481834
HMDB0011664	NA	3-Methylene-Indolenine	1.40645	0.330783	0.481834
HMDB0251665	C01341	3-[[1-[4-(Diaminomethylideneamino)Butylamino-4-Methyl-1-Oxopentan-2-YlCarbamoylOxirane-2-Carboxylic Acid	2.90296	0.330783	0.481834
NA	NA	26-Deoxycimicifugoside	0.514449	0.330783	0.481834
NA	NA	13-O-P-Coumaroylplumieride	1.46308	0.330783	0.481834
HMDB0259191	NA	Triethyl Phosphate	0.704078	0.342621	0.481834
HMDB0000893	C08278	Suberic Acid	0.782401	0.342621	0.481834
HMDB0001256	C00750	Spermine	1.19426	0.342621	0.481834
HMDB0003070	C00493	Shikimic Acid	0.694086	0.342621	0.481834
HMDB0029046	NA	Ser-Phe	1.90289	0.342621	0.481834
NA	C06338	Quinolinol	1.14072	0.342621	0.481834
HMDB0256501	NA	Phthalic Anhydride	0.676961	0.342621	0.481834
HMDB0028994	NA	Phenylalanylglutamate	1.26808	0.342621	0.481834
HMDB0004825	C04227	Octopamine	0.661221	0.342621	0.481834
HMDB0304442	NA	Octadecenedioic Acid	1.72646	0.342621	0.481834
HMDB0255165	NA	N-Lauroylsarcosine	0.705803	0.342621	0.481834
HMDB0243607	NA	N-(3-Hydroxybutanoyl)Homoserine Lactone	0.755625	0.342621	0.481834
NA	NA	Myristamine Oxide	0.591963	0.342621	0.481834
NA	NA	Methyl 3-Oxo-2-[(3,4,5-Trimethoxyphenyl)MethyleneBenzo[BFuran-5-Carboxylate	0.7126	0.342621	0.481834
NA	C08716	Malvidin	0.809069	0.342621	0.481834
HMDB0015163	C07469	Irbesartan	1.30433	0.342621	0.481834
HMDB0000661	C00489	Glutaric Acid	1.91305	0.342621	0.481834
HMDB0035749	C08944	Ginsenoside Re	1.63873	0.342621	0.481834
HMDB0000145	C00468	Estrone	0.24571	0.342621	0.481834
NA	NA	Dodecyl sulfate	3.3758	0.342621	0.481834
HMDB0251388	C11233	Dimethyl Phthalate	0.762851	0.342621	0.481834
HMDB0038457	C16952	Dihydrocapsaicin	7.27094	0.342621	0.481834
HMDB0033244	C14214	Dibutyl Phthalate	0.745371	0.342621	0.481834
HMDB0250535	NA	Cresyl Saligenin	0.778135	0.342621	0.481834
HMDB0000097	C00114	Choline	1.38225	0.342621	0.481834
HMDB0032930	NA	Benzothiazole	0.751941	0.342621	0.481834
HMDB0032049	C06354	Benzophenone	0.709614	0.342621	0.481834
HMDB0028716	NA	Arginylphenylalanine	1.6899	0.342621	0.481834
HMDB0248559	NA	Arachidoyl Ethanolamide	0.703666	0.342621	0.481834
HMDB0303912	C09938	5-Hydroxycalamenene	0.712056	0.342621	0.481834
HMDB0246248	NA	5,6-Dihydroxy-2-Methylaminotetralin	0.525388	0.342621	0.481834
NA	NA	4-Methylphthalic Anhydride	0.761862	0.342621	0.481834
HMDB0029559	NA	4-Hydroxybenzoylcholine	0.637726	0.342621	0.481834
NA	NA	3-O-Acetylpadmatin	0.00219457	0.342621	0.481834
HMDB0034259	C05669	3-Nitropropionic Acid	1.13905	0.342621	0.481834
NA	NA	3-Indol-3-Yl-2-{[(7-Methyl-3-Oxo(2H,4H-Benzo[3,4-E1,4-Oxazaperhydroin-6-Yl))S UlfonylAmino}Propanoic Acid	2.14144	0.342621	0.481834
NA	NA	3-Hydroxy-4-Methoxy-2,3-Dihydropyran-6-One	0.744647	0.342621	0.481834
HMDB0303058	NA	2-Phenylethyl 6-O-(6-Deoxy-Alpha-L-Mannopyranosyl)-Beta-D-Glucopyranoside	1.26777	0.342621	0.481834
HMDB0011692	C03104	2-CMP	0.905724	0.342621	0.481834
NA	NA	2,6-Di-Tert-Butyl-4-Nitrophenol	0.844874	0.342621	0.481834
HMDB0252730	NA	16Beta-Hydroxydigitoxigenin	11.4086	0.342621	0.481834
HMDB0002123	C16361	1,3,7-Trimethyluric Acid	0.69008	0.342621	0.481834
HMDB0002264	NA	(R)-2-Hydroxycaprylic Acid	1.06898	0.342621	0.481834
NA	NA	(2E,4E,14E)-13-Hydroperoxy-N-(2-Methylpropyl)Icosa-2,4,14-Trienamide	0.721706	0.342621	0.481834
NA	NA	1,3-Dichloro-6,7,8,9,10,12-Hexahydroazepino[2,1-BQuinazoline	Inf	0.363234	0.510267
NA	NA	2H-Furo[3,2-BNaphtho[2,3-G[1,5Dioxonin-5,12-Dione, 2-[[6-O-[(2E)-3-[4-[(6-Deoxyhexopyranosyl)OxyPhenyl-1-Oxo-2-Propen-1-YlHexopyranosylOxy-3,3A,5A,6,14,14A-Hexahydro-3,8-Dihydroxy-2-(Hydroxymethyl)-6-(4-Hydroxyphenyl)-7,9-Dimethoxy-	4.02046	0.367077	0.514546
NA	NA	[(10Z)-6,10-Bis(Hydroxymethyl)-3-Methylidene-2-Oxo-3A,4,5,6,7,8,9,11A-Octahydrocyclodeca[BFuran-4-Yl 2-Methylprop-2-Enoate	4.80696	0.367077	0.514546
HMDB0011503	NA	(2-Aminoethoxy)[(2R)-3-(Hexadecanoyloxy)-2-HydroxypropoxyPhosphinic Acid	1.45088	0.374892	0.524573
HMDB0001409	C00365	Deoxyuridine Monophosphate	1.42571	0.378277	0.524573
NA	NA	9,12,13-Trihydroxyoctadeca-10,15-Dienoic Acid	3.53554	0.378277	0.524573
NA	NA	(4E)-1,7-Bis(4-Hydroxyphenyl)Hept-4-En-3-One	0.470372	0.378277	0.524573
NA	NA	N-Fructosyl Isoleucine	1.67274	0.378905	0.524573
HMDB0004207	C04700	Glutamyllysine	1.20133	0.378905	0.524573
HMDB0030604	C10289	Epsilon-Viniferin	1.7251	0.378905	0.524573
HMDB0002322	C01672	Cadaverine	0.962603	0.378905	0.524573
NA	NA	3-[(2R,3S)-5-Hydroxy-2,3,8,8-Tetramethyl-4-Oxo-2,3-Dihydropyrano[2,3-HChromen-6-YlHexanoic Acid	13.964	0.378905	0.524573
NA	NA	3,5,7,10,15-O-Pentacetyl-14-O-Benzoyl-10,18-Dihydromyrsinol	0.984831	0.378905	0.524573
HMDB0243512	D01371	Vinpocetine	1.56384	0.391297	0.524573
HMDB0000289	C00366	Uric Acid	1.06921	0.391297	0.524573
HMDB0258632	C12043	Surfactin	0.798654	0.391297	0.524573
NA	NA	Radiclonic Acid	1.0097	0.391297	0.524573
NA	NA	Pyroglu-Ile-Arg	2.60817	0.391297	0.524573
HMDB0000767	C02067	Pseudouridine	1.0249	0.391297	0.524573
HMDB0014730	C07973	Piperazine	0.711126	0.391297	0.524573
HMDB0000267	C01879	Pidolic Acid	1.01322	0.391297	0.524573
HMDB0005765	C21016	Ophthalmic Acid	0.615047	0.391297	0.524573
NA	NA	N-Fructosyl Isoleucylglutamate	0.679352	0.391297	0.524573
HMDB0013267	NA	N-Decanoylglycine	0.953522	0.391297	0.524573
HMDB0041943	C12271	N-Acetyldopamine	0.8685	0.391297	0.524573
HMDB0245928	NA	M-Toluamide	1.56285	0.391297	0.524573
HMDB0001932	C07202	Metoprolol	1.42293	0.391297	0.524573
NA	NA	Graveolide	1.49334	0.391297	0.524573
HMDB0028853	NA	Gly-Tyr	1.24187	0.391297	0.524573
HMDB0000592	C04132	Glucosamine 6-O-Sulfate	0.926759	0.391297	0.524573
HMDB0005807	C01424	Gallic Acid	0.961819	0.391297	0.524573
NA	NA	Bovoside A	1.70408	0.391297	0.524573
NA	NA	Beta- Belladonnine Dichloroethylate	0.381142	0.391297	0.524573
NA	NA	8-Hydroxy-9,10-Epoxystearic Acid	0.815446	0.391297	0.524573
HMDB0030030	C07288	6-Methyl-5-Hepten-2-Ol	0.78909	0.391297	0.524573
HMDB0304210	C00906	5,6-Dihydrothymine	1.18764	0.391297	0.524573
HMDB0246511	C19262	4-Methylimidazole	0.534731	0.391297	0.524573
HMDB0000500	C00156	4-Hydroxybenzoic Acid	0.770339	0.391297	0.524573
NA	NA	4-[3-Methyl-5-(5,6,7-Trihydroxy-1,2,4A,5-Tetramethyl-3,4,6,7,8,8A-Hexahydro-2H-Naphthalen-1-Yl)Pentoxy-4-Oxobutanoic Acid	0.755938	0.391297	0.524573
NA	NA	3-Methyl-7-[(3-Methylphenyl)Methyl-8-Nonylthio-1,3,7-Trihydropurine-2,6-Dione	1.06342	0.391297	0.524573
HMDB0246116	NA	3(2H)-Pyridazinone	1.22486	0.391297	0.524573
HMDB0245134	NA	2-Furancarboximidamide	0.806458	0.391297	0.524573
HMDB0245092	NA	2-Cyclopenten-1-One	1.14702	0.391297	0.524573
HMDB0251509	NA	2-(2-Aminopropanamido)-4-Methylpentanoic Acid	2.42734	0.391297	0.524573
HMDB0014607	NA	1-Tetradecanol Hydrogen Sulfate	1.32657	0.391297	0.524573
HMDB0013122	C04230	(2-{[(2R)-2-Hydroxy-3-[(1Z)-Octadec-1-En-1-YloxyPropyl PhosphonatoOxy}Ethyl)Trimethylazanium	Inf	0.394806	0.528729
HMDB0060026	NA	Vanilloylglycine	5.83695	0.405436	0.542403
NA	NA	4H-Phenanthro[10,1-BcFuran-4-One, Tetradecahydro-1,2,6,9,10-Pentahydroxy-3,10A,10C-Trimethyl-7-Methylene-, (1S,2R,3R,5As,6R,9S,10S,10As,10Cr)-	1.24675	0.429282	0.569128
NA	NA	1,2-Dihexanoyl-Sn-Glycerol	1.66534	0.429282	0.569128
HMDB0029134	NA	Val-Phe	2.4556	0.430503	0.569128
NA	NA	9-Methoxy-4,4-Dimethyl-13-Phenyl-6,14-Dioxatetracyclo[8.4.0.02,7.03,5Tetradeca-1,7,9-Trien-11-One	0.11174	0.430503	0.569128
HMDB0061717	NA	Succinylcarnitine	2.57905	0.431111	0.569128
HMDB0000350	NA	3-Hydroxysebacic Acid	0.263595	0.431111	0.569128
HMDB0040329	NA	Xi-5-Hydroxydecanoic Acid	1.09147	0.443928	0.569128
NA	NA	Tschimganidin	0.810876	0.443928	0.569128
HMDB0031193	C19806	Tricarballylic Acid	3.35882	0.443928	0.569128
NA	NA	Triacetylfusarinine C	2.6565	0.443928	0.569128
HMDB0062701	NA	TG(17:0/18:1/18:1)	5.77081	0.443928	0.569128
HMDB0000792	C08277	Sebacic Acid	1.51091	0.443928	0.569128
NA	NA	R-Deprenyl N-Oxide	0.675963	0.443928	0.569128
HMDB0014888	C07531	Prilocaine	0.41155	0.443928	0.569128
HMDB0004610	C12144	Phytosphingosine	0.615002	0.443928	0.569128
HMDB0256329	NA	Perfluorooctanoic Acid	1.17378	0.443928	0.569128
HMDB0031608	D03467	Peracetic Acid	0.793781	0.443928	0.569128
HMDB0031031	NA	O-Dodecylbenzenesulfonic Acid	1.09191	0.443928	0.569128
NA	NA	N-Fructosyl Pyroglutamate	1.41133	0.443928	0.569128
HMDB0000912	NA	N6-Succinyladenosine	1.1929	0.443928	0.569128
HMDB0040646	NA	Myrsinone	0.859244	0.443928	0.569128
NA	NA	Mundulone	0.947938	0.443928	0.569128
HMDB0000227	C00418	Mevalonic Acid	1.17187	0.443928	0.569128
HMDB0242427	NA	Mesaconine	1.14156	0.443928	0.569128
HMDB0004363	C06195	Imidazolone	0.537949	0.443928	0.569128
HMDB0028897	NA	Histidyltyrosine	1.09199	0.443928	0.569128
NA	NA	Diethyl Azelate	0.784395	0.443928	0.569128
HMDB0000957	C00090	Catechol	1.40691	0.443928	0.569128
HMDB0249891	NA	Antcin K	1.09621	0.443928	0.569128
NA	C10933	Amidosulfuron	2.05475	0.443928	0.569128
HMDB0255052	C03137	Acetyltryptophan	0.462408	0.443928	0.569128
HMDB0034159	NA	Acetyltributyl Citrate	0.886717	0.443928	0.569128
HMDB0004710	C14835	9,10,13-Trihome	1.17779	0.443928	0.569128
HMDB0032988	NA	5-Hydroxymaltol	1.0815	0.443928	0.569128
HMDB0247018	C19642	5Beta-Cholanic Acid	0.623979	0.443928	0.569128
HMDB0246643	NA	5,6-Dimethyl-2,3-Pyrazinedicarbonitrile	0.829238	0.443928	0.569128
HMDB0001866	C05580	3,4-Dihydroxymandelic Acid	1.36142	0.443928	0.569128
HMDB0303335	C10910	2-(Methylthio)Benzothiazole	0.896563	0.443928	0.569128
HMDB0059696	NA	1,2,3,4,Tetrahydro-1,5,7-Trimethylnapthalene	0.806161	0.443928	0.569128
NA	NA	[(6Z,10Z)-6-(Acetyloxymethyl)-10-(Hydroperoxymethyl)-3-Methylidene-2-Oxo-3A,4,5,8,9,11A-Hexahydrocyclodeca[BFuran-4-Yl 2-Methylbutanoate	1.35677	0.443928	0.569128
NA	NA	(7S,9E,11S,12R,13S,14S,15S,16R,17S,18S,19E,21Z)-13-(Acetyloxy)-15,17-Dihydroxy-11-Methoxy-3,7,12,14,16,18,22-Heptamethyl-6,23,27,29-Tetraoxo-8,30-Dioxa-24-Azatetracyclo[23.3.1.1^{4,7}.0^{5,28}Triaconta-1,3,5(28),9,19,21,25-Heptaen-2-Yl 4-Chlorobenzoa...	1.17031	0.443928	0.569128
NA	NA	(5R)-5-Hydroxy-1-(4-Hydroxy-3-Methoxyphenyl)Decan-3-One	0.877174	0.443928	0.569128
NA	NA	3,3,4,4,5,5,6,6,7,7,8,8,9,9,9-Pentadecafluorononan-1-Ol	6.33457	0.480638	0.61558
HMDB0002302	NA	3-(Indol-3-Yl)Propionic Acid	1.0835	0.483592	0.618748
NA	NA	(3Beta,5Xi,9Xi,13Xi,16Beta,17Xi,22R,23R,24R)-3-{[Alpha-L-Arabinofuranosyl-(1-2)-[Beta-D-Glucopyranosyl-(1-3)-Alpha-L-ArabinopyranosylOxy}-20-Hydroxy-24-Methyl-16,23:16,30-Diepoxydammar-25-En-22-Yl Acetate	1.41463	0.485533	0.62037
NA	NA	L-3-Hydroxy-N-Methylmorphinan Bitartrate	1.28712	0.486688	0.62037
NA	NA	Subsessiline	1.38994	0.487262	0.62037
NA	NA	N-(5-Chloro-2-Methoxyphenyl)-2-[9-(4-Methylphenyl)-6-Oxohydropurin-8-YlthioAc Etamide	1.18528	0.487262	0.62037
NA	C18785	Dinitramine	0.859062	0.487262	0.62037
HMDB0000291	C05584	Vanilmandelic Acid	1.10042	0.499828	0.62046
NA	NA	Tris-(2-Chloroisopropyl)Phosphate	0.812185	0.499828	0.62046
NA	NA	Tetradecyldiethanolamine	0.753319	0.499828	0.62046
HMDB0014372	C07074	Lovastatin	0.820549	0.499828	0.62046
HMDB0000510	C00956	L-Alpha-Aminoadipate	2.65611	0.499828	0.62046
HMDB0031195	C14743	Isophorone	0.916433	0.499828	0.62046
HMDB0251566	C13831	Dodecanamide	0.648421	0.499828	0.62046
HMDB0251427	C14227	Dioctyl Phthalate	0.728247	0.499828	0.62046
NA	NA	Delta9-Eremophilansaeure	0.852487	0.499828	0.62046
HMDB0059839	C06076	Camphene	0.852621	0.499828	0.62046
HMDB0061657	NA	3-Hydroxypentadecanoic Acid	1.38208	0.499828	0.62046
HMDB0032994	NA	3-Hydroxy-2H-Pyran-2-One	1.42454	0.499828	0.62046
NA	NA	2-O-Methylguanosine	1.10501	0.499828	0.62046
HMDB0004666	C13856	2-Arachidonoylglycerol	0.72175	0.499828	0.62046
NA	NA	2-{1-[(4-Chlorophenyl)Carbonyl-5-Methoxy-2-Methylindol-3-Yl}-N-(2-Pyridylmeth Yl)Acetamide	0.767813	0.499828	0.62046
HMDB0246998	NA	2,6-Diamino-9-(2-Hydroxyethoxymethyl)Purine	0.706096	0.499828	0.62046
NA	NA	2,4-Dihydroxy-4-[(1E)-3-Hydroxy-1-Buten-1-Yl-3,5,5-Trimethylcyclohexyl Beta-D-Glucopyranoside	1.14844	0.499828	0.62046
HMDB0243989	NA	1-Pentyl-3-(1-Naphthoyl) Indole	0.429267	0.499828	0.62046
HMDB0244880	NA	1H-Imidazole-4-Carboxamide	1.23445	0.499828	0.62046
HMDB0240707	C11033	1-Aminomethylphosphonic Acid	0.907712	0.499828	0.62046
HMDB0249243	C03690	14C -Dehp	1.11948	0.499828	0.62046
NA	NA	10-Ethyl-14-Methyl-12-Oxa-4-Azatetracyclo[7.6.1.0,.0,Hexadecan-13-One	1.32608	0.499828	0.62046
HMDB0244231	C19463	1,5-Naphthalenediamine	1.36338	0.499828	0.62046
NA	NA	[(3Ar,4R,5R,6Z,9Z,11Ar)-4-Hydroxy-6,10-Dimethyl-3-Methylidene-2,8-Dioxo-4,5,11,11A-Tetrahydro-3Ah-Cyclodeca[BFuran-5-Yl (Z)-2-Methylbut-2-Enoate	1.4059	0.499828	0.62046
HMDB0003033	D03363	(9S,14S)-10,13-Dimethylspiro[2,8,9,11,12,14,15,16-Octahydro-1H-Cyclopenta[APhenanthrene-17,5-Oxolane-2,3-Dione	1.50568	0.499828	0.62046
NA	NA	(5S)-17-Hydroxy-10,13-Dimethyltetradecahydro-1H-Cyclopenta[APhenanthren-3(2H)-One	0.774026	0.499828	0.62046
HMDB0302836	NA	Sativic Acid	Inf	0.515231	0.638966
HMDB0256511	C10746	Phyllanthin	1.46222	0.543763	0.67048
HMDB0000645	C00446	Galactose 1-Phosphate	0.908743	0.543763	0.67048
NA	NA	2-[(2E,5E,7E,11E)-10-Hydroxy-3,7,9,11-Tetramethyl-2,5,7,11-Tridecatetraen-1-Yl-5,6-Dimethoxy-3-Methyl-4-Pyridinyl 6-Deoxy-Alpha-L-Mannopyranoside	2.10192	0.545551	0.67048
HMDB0003540	C01367	3-Adenylic Acid	1.3487	0.546614	0.67048
NA	C15742	Cyanopeptolin A	0.234644	0.547143	0.67048
NA	NA	5,7-Dimethyl-4-(2-1,2,3,4-Tetrahydroisoquinolylmethyl)Chromen-2-One	0.794232	0.547143	0.67048
HMDB0036818	NA	Vitispirane	0.754018	0.55934	0.67048
HMDB0003555	C02059	Vitamin K1	0.876058	0.55934	0.67048
NA	C09249	Usambarensine	1.19222	0.55934	0.67048
HMDB0000043	C00719	Trimethyl Glycine	1.29566	0.55934	0.67048
HMDB0014118	NA	Trifluoroacetic Acid	1.11971	0.55934	0.67048
HMDB0094708	NA	Tetraethylene Glycol	0.989483	0.55934	0.67048
HMDB0015044	C06527	Quinidine	0.669343	0.55934	0.67048
HMDB0013139	C14519	Pyrenol	1.39904	0.55934	0.67048
HMDB0001565	C00588	Phosphocholine	1.33789	0.55934	0.67048
HMDB0013279	NA	N-Nonanoylglycine	0.891148	0.55934	0.67048
HMDB0002064	C02714	N-Acetylputrescine	1.1758	0.55934	0.67048
NA	NA	N-(((1S,9Ar)-Octahydro-1H-Quinolizin-1-Yl)Methyl)-5-(Pyridin-3-Yl)-1H-Pyrazole-3-Carboxamide	6.94688	0.55934	0.67048
HMDB0014550	D01046	Methylrosanilinium Chloride	3.91941	0.55934	0.67048
NA	NA	Methyl 4,5,6-Trihydroxy-3-(3-Methoxy-3-Oxoprop-1-En-2-Yl)Oxycyclohexene-1-Carboxylate	1.32235	0.55934	0.67048
HMDB0059837	NA	Indane	0.922608	0.55934	0.67048
HMDB0302261	NA	Di-N-Propylamine	0.840955	0.55934	0.67048
HMDB0011747	C03557	Aminoethylphosphonic Acid	1.25572	0.55934	0.67048
NA	NA	9,13-Epoxy-3,18-Dihydroxy-15,16-Labdanolide	1.17504	0.55934	0.67048
HMDB0010221	NA	9,10-Dihode	2.00954	0.55934	0.67048
NA	NA	6-Chloro-2-(Trichloromethyl)Chromen-4-One	1.01339	0.55934	0.67048
HMDB0029646	C10680	4-O-Methylphloroacetophenone	0.897514	0.55934	0.67048
HMDB0041277	NA	3-[3-Carboxy-2,3-Dihydro-2-(4-Hydroxy-3-Methoxyphenyl)-7-Methoxy-5-Benzofuranyl-2-Propenoic Acid	1.61667	0.55934	0.67048
NA	NA	3,5-Dihydroxydecanoic Acid	0.812175	0.55934	0.67048
HMDB0001873	C02632	2-Methylpropanoic Acid	1.0705	0.55934	0.67048
HMDB0031158	NA	2-Methyl-4-Pentenoic Acid	1.41334	0.55934	0.67048
HMDB0039332	NA	2-(6-P-Coumaroylglucosyl)Quercitrin	0.955763	0.55934	0.67048
NA	NA	1-Methyl-3,4-Dihydro-2H-Pyrido[3,4-BIndole	4.94952	0.55934	0.67048
HMDB0251502	NA	1,3,5-Hexatriene	0.673976	0.55934	0.67048
NA	NA	[6-[6-[6-[4,5-Dihydroxy-6-[(2E,6E)-10-Hydroxy-2,6,10-Trimethyldodeca-2,6,11-Trienoxy-2-Methyloxan-3-YlOxy-4,5-Dihydroxy-2-Methyloxan-3-YlOxy-4,5-Dihydroxy-2-Methyloxan-3-YlOxy-4,5-Dihydroxy-2-Methyloxan-3-Yl Acetate	1.29144	0.55934	0.67048
NA	NA	[(2R,3S,4S,5R,6R)-6-[1,7-Bis(3,4-Dihydroxyphenyl)-5-Oxoheptan-3-YlOxy-3,4,5-Trihydroxyoxan-2-YlMethyl (E)-3-(3,4-Dimethoxyphenyl)Prop-2-Enoate	0.686439	0.55934	0.67048
NA	NA	2-[5-[2-[2-[5-[2-[2-[5-[2-[2-[5-(2-Hydroxybutyl)Oxolan-2-YlPropanoyloxyPropylOxolan-2-YlPropanoyloxyPropylOxolan-2-YlPropanoyloxyPropylOxolan-2-YlPropanoic Acid	1.28615	0.576882	0.690867
HMDB0014571	D08648	Triprolidine	0.710178	0.607443	0.719722
NA	NA	(3E)-7-Hydroxy-3,7-Dimethyl-3-Octen-1-Yl 6-O-(6-Deoxy-Alpha-L-Mannopyranosyl)-Beta-D-Glucopyranoside	1.56455	0.607443	0.719722
HMDB0245678	NA	P-Nitrophenyl-Alpha-Galactopyranoside	1.32409	0.609984	0.719722
NA	NA	3-Hydroxy-N-(1-Hydroxy-4-Methylpentan-2-Yl)-5-Oxo-6-Phenylhexanamide	1.08831	0.610455	0.719722
HMDB0000098	C01394	Xylose	1.37562	0.621603	0.719722
HMDB0000301	C00785	Urocanic Acid	0.992962	0.621603	0.719722
NA	C18652	Thiofanox	0.668229	0.621603	0.719722
HMDB0000872	C11002	Tetradecanedioic Acid	1.02979	0.621603	0.719722
HMDB0029135	NA	Prolylvaline	1.13475	0.621603	0.719722
NA	NA	PFSM-perfluoroalkyl_sulfonamide	1.10787	0.621603	0.719722
HMDB0028977	NA	Methionyl-Leucine	0.917401	0.621603	0.719722
HMDB0000696	C00073	Methionine	2.83457	0.621603	0.719722
NA	NA	Macrosphelide D	1.77731	0.621603	0.719722
HMDB0000168	C00152	L-Asparagine	0.966382	0.621603	0.719722
NA	NA	Hex-Naringenin (Put)	1.36587	0.621603	0.719722
HMDB0030311	C06538	Harmine	4.05276	0.621603	0.719722
HMDB0014474	C06984	Ethambutol	1.80057	0.621603	0.719722
HMDB0000068	C00788	Epinephrine	1.11763	0.621603	0.719722
NA	NA	Deacetoxy-7-Oxogedunin	1.54104	0.621603	0.719722
NA	NA	Cyclododecalactam	0.845606	0.621603	0.719722
HMDB0001046	NA	Cotinine	0.655207	0.621603	0.719722
NA	NA	Aeruginosamide B	0.0936722	0.621603	0.719722
HMDB0000034	C00147	Adenine	1.01138	0.621603	0.719722
HMDB0247607	C19670	9-Octadecenamide	1.31453	0.621603	0.719722
NA	NA	8-Hydroxy-13,14,15,16-Tetranor-12-Labdanoic Acid	1.00904	0.621603	0.719722
NA	NA	4,5-Dihydroxy-4,5,6-Trimethyl-2,8-Dioxa-13-Azatricyclo[8.5.1.013,16Hexadec-10-Ene-3,7-Dione	1.02712	0.621603	0.719722
NA	NA	4-(Decan-4-Yl)Benzenesulfonic Acid	1.26579	0.621603	0.719722
HMDB0112086	NA	3-Methyl-5-Pentyl-2-Furanpentanoic Acid	0.849897	0.621603	0.719722
NA	NA	3-Hydroxy-4-(Succin-2-Yl)-Caryolane Delta-Lactone	1.25795	0.621603	0.719722
NA	NA	3-[(4-Hydroxyphenyl)Methyl-2,3,6,7,8,8A-Hexahydropyrrolo[1,2-APyrazine-1,4-Dione	3.34428	0.621603	0.719722
HMDB0000379	NA	2-Methylcitric Acid	0.457769	0.621603	0.719722
HMDB0033001	NA	2-Methylbenzothiazole	1.04103	0.621603	0.719722
NA	NA	2-[5-[2-[2-[5-(2-Hydroxybutyl)Oxolan-2-YlPropanoyloxyButylOxolan-2-YlPropanoic Acid	0.517656	0.621603	0.719722
NA	NA	2-(Methylethylidene)Butanedioic Acid	1.27189	0.621603	0.719722
HMDB0030767	NA	11,12-Dimethoxydihydrokawain	1.27813	0.621603	0.719722
HMDB0244157	NA	1,3-Benzodioxole-5,6-Diamine	1.39169	0.621603	0.719722
NA	NA	1-(4-Acetamidobenzene-1-Sulfonyl)Proline	2.6603	0.621603	0.719722
HMDB0011130	C21484	1-Octadecanoyl-Sn-Glycero-3-Phosphoethanolamine	1.06666	0.675612	0.773014
NA	NA	N-Cyclopentyl-2-{4-[(6-Ethoxy-2-Oxochromen-4-Yl)MethylPiperazinyl}Acetamide	0.678946	0.676421	0.773014
NA	NA	(3Beta,5Alpha,9Xi)-3-{[Beta-D-Glucopyranosyl-(1-6)-Beta-D-Glucopyranosyl-(1-4)-6-Deoxy-3-O-Methyl-Beta-L-IdopyranosylOxy}-14-Hydroxy-19-Oxocard-20(22)-Enolide	0.416642	0.676823	0.773014
NA	NA	Val-Gly-Val	1.65671	0.686791	0.773014
HMDB0002327	NA	Tridecanedioic Acid	1.13077	0.686791	0.773014
HMDB0030124	C01390	Prenol	1.15552	0.686791	0.773014
NA	NA	Okaramine R	1.97452	0.686791	0.773014
HMDB0060997	NA	O-Desmethyl Tramadol	0.984162	0.686791	0.773014
HMDB0062178	NA	N-Lactoyl-Tryptophan	0.366282	0.686791	0.773014
NA	NA	Nafadotride	1.26315	0.686791	0.773014
HMDB0254636	NA	Methylene-Imidazole	0.890548	0.686791	0.773014
HMDB0254615	NA	Methyl Syringate	0.413727	0.686791	0.773014
HMDB0015086	C07054	Isoniazid	0.755402	0.686791	0.773014
HMDB0029488	NA	Gummosin	1.70719	0.686791	0.773014
HMDB0250671	NA	Cyclopentylamine	1.38507	0.686791	0.773014
HMDB0015373	D03472	Chloroxine	0.720914	0.686791	0.773014
HMDB0249836	C01564	Cetraxate	0.745331	0.686791	0.773014
HMDB0037559	NA	Cadabicilone	0.779119	0.686791	0.773014
NA	NA	8-(Diethylamino)Octyl-3,4,5-Trimethoxybenzoate Hydrochloride53464-72-5	0.165214	0.686791	0.773014
NA	NA	6-Ethoxy-4-({4-[(4-Methoxyphenyl)MethylPiperazinyl}Methyl)Chromen-2-One	1.43554	0.686791	0.773014
HMDB0249518	NA	4-Methylene-2-Octyl-5-Oxotetrahydrofuran-3-Carboxylic Acid	0.898626	0.686791	0.773014
HMDB0245820	NA	3-Aminopicolinaldehyde	1.27103	0.686791	0.773014
HMDB0244908	NA	3,5-Dihydroxyphenylglycine	0.812973	0.686791	0.773014
NA	NA	3-(4-Hydroxyphenyl)Propanoic Acid 3-(4-Hydroxy-3-Methoxyphenyl)Propyl Ester	2.15635	0.686791	0.773014
HMDB0059758	C02488	2-Hydroxy-2-Ethylsuccinic Acid	0.899308	0.686791	0.773014
HMDB0247150	NA	2-Amino-6-Nitrobenzothiazole	0.682134	0.686791	0.773014
NA	NA	2,2,4,4,6,6-Hexamethoxy-1,1-Biphenyl	1.6029	0.686791	0.773014
NA	NA	12-Hydroxy-13-(Hydroxymethyl)-3,5,7-Trimethyl-2,4-Tetradecadienedioic Acid	1.21015	0.686791	0.773014
HMDB0243498	NA	1-(3-Carboxypropyl)-3,7-Dimethylxanthine	1.45657	0.686791	0.773014
NA	NA	[5-Acetyloxy-3-(Hydroxymethyl)-2-Oxo-6-Propan-2-Ylcyclohex-3-En-1-Yl 3-Methylbutanoate	2.05801	0.686791	0.773014
NA	NA	[(2R,3S,4S,5R,6S)-3,4-Dihydroxy-6-[3,7,8-Trihydroxy-2-(4-Hydroxy-3-Methoxyphenyl)-4-Oxochromen-5-YlOxy-5-[(2S,3R,4R,5R,6S)-3,4,5-Trihydroxy-6-Methyloxan-2-YlOxyoxan-2-YlMethyl Acetate	0.430435	0.686791	0.773014
NA	NA	(4Beta,6Alpha)-8-Daucene-4,6-Diol	0.887796	0.686791	0.773014
HMDB0015017	C12599	Racivir	NA	0.718319	0.807796
HMDB0010386	C04100	1-(9Z,12Z-Octadecadienoyl)-Sn-Glycero-3-Phosphocholine	0.906324	0.744827	0.82759
NA	NA	Inaequalisine_A	0.326733	0.745479	0.82759
NA	NA	1,4-Ethanonaphthalene-5,10-Dicarboxylic Acid, 1,4,4A,5,6,8A-Hexahydro-5,10-Dihydroxy-6,9-Dioxo-, Bis[[2-(Beta-D-Glucopyranosyloxy)-3-HydroxyphenylMethyl Ester	1.29623	0.745802	0.82759
HMDB0000288	C00105	UMP	1.04153	0.75387	0.82759
HMDB0001858	C01468	P-Cresol	1.01509	0.75387	0.82759
HMDB0002329	C00209	Oxalic Acid	0.830046	0.75387	0.82759
HMDB0032562	C11016	N,N-Diphenylamine	0.716777	0.75387	0.82759
HMDB0031581	C14452	Morpholine	1.17381	0.75387	0.82759
HMDB0028950	NA	Lysylglutamic Acid	0.995686	0.75387	0.82759
HMDB0000193	C00311	Isocitric Acid	0.929166	0.75387	0.82759
HMDB0000672	C19615	Hexadecanedioic Acid	1.27212	0.75387	0.82759
HMDB0254590	NA	Gallic Acid Methyl Ester	0.874694	0.75387	0.82759
HMDB0252461	NA	Forsythoside B	1.19741	0.75387	0.82759
HMDB0244507	NA	Erucamide	0.884399	0.75387	0.82759
HMDB0251144	D03771	Diaveridine	1.0069	0.75387	0.82759
NA	NA	Cotoin	1.11971	0.75387	0.82759
HMDB0031345	NA	Calystegine A6	1.07685	0.75387	0.82759
NA	NA	C17-Sphinganine	1.20477	0.75387	0.82759
HMDB0035918	NA	7(14)-Bisabolene-2,3,10,11-Tetrol	0.974096	0.75387	0.82759
NA	NA	6,8-Bis(Morpholino-4-Iummethyl)-4-Oxo-3-(4-(((2S,3R,4S,5S,6R)-3,4,5-Trihydroxy-6-(Hydroxymethyl)Tetrahydro-2H-Pyran-2-Yl)Oxy)Phenyl)-4H-Chromene-5,7-Bis(Olate)	0.913638	0.75387	0.82759
HMDB0245199	NA	2-Methoxy-3,4-Dimethylphenyl Acetate	1.04667	0.75387	0.82759
NA	NA	2-(7-Hydroxy-6-Methyloctyl)-2H-Furan-5-One	0.857202	0.75387	0.82759
HMDB0244075	NA	1,2-Dihydroisoquinoline	1.31695	0.75387	0.82759
HMDB0010728	NA	(R)-3-Hydroxydodecanoic Acid	0.782414	0.75387	0.82759
NA	NA	(2S,4R,9Beta,16Alpha,17Xi,23E)-2-(Beta-D-Glucopyranosyloxy)-16,20-Dihydroxy-9,10,14-Trimethyl-1,11,22-Trioxo-4,9-Cyclo-9,10-Secocholesta-5,23-Dien-25-Yl Acetate	0.68761	0.75387	0.82759
NA	NA	(2S,3S,4S,5R,6R)-6-[[(3S,6Ar,6Bs,8As,12As,14Br)-4,4,6A,6B,11,11,14B-Heptamethyl-8A-[(2S,3R,4S,5S,6R)-3,4,5-Trihydroxy-6-(Hydroxymethyl)Oxan-2-YlOxycarbonyl-1,2,3,4A,5,6,7,8,9,10,12,12A,14,14A-Tetradecahydropicen-3-YlOxy-3,5-Dihydroxy-4-[(2S,3R,4R,5R,6S)-3,4,5-Trihydroxy-6-Methyloxan-2-YlOxyoxane-2-Carboxylic Acid	0.977965	0.75387	0.82759
NA	NA	(2S,3S)-3-Decyl-2-Hydroxy-2-(3-Methoxy-3-Oxopropyl)Butanedioic Acid	0.828593	0.75387	0.82759
HMDB0037605	NA	(10Betah,11Xi)-11-Hydroxy-13-Nor-6-Eremophilen-8-One	0.951611	0.75387	0.82759
HMDB0304820	C05944	Pantothenol	NA	0.779067	0.853799
NA	NA	Ethyl 4-[2-(9-Methyl-6-Oxohydropurin-8-Ylthio)AcetylaminoBenzoate	NA	0.779067	0.853799
NA	NA	8-[(2-Chlorophenyl)Methylthio-3-Methyl-7-[(3-Methylphenyl)Methyl-1,3,7-Trihy Dropurine-2,6-Dione	0.766717	0.781114	0.854591
NA	NA	5-Hydroxymethylcytidine	1.25611	0.781114	0.854591
HMDB0001943	C02765	Pseudoephedrine	1.15459	0.816645	0.871625
HMDB0240587	C06193	3-GMP	4.40224	0.816645	0.871625
HMDB0000252	C00319	Sphingosine	1.50765	0.816882	0.871625
NA	NA	Beta-D-Glucopyranose, 1-O-[(2Alpha,3Beta,5Xi,9Xi,18Xi)-2,3,19-Trihydroxy-28-Oxours-12-En-28-Yl-	1.2597	0.816882	0.871625
NA	NA	1-Allyl-2-Hydroxy-7,8,9,10-Tetrahydroazepino[2,1-BQuinazolin-12(6H)-One	1.13563	0.816882	0.871625
NA	NA	Yohimbinic Acid Monohydrate	0.999421	0.823013	0.871625
HMDB0000296	C00299	Uridine	0.900204	0.823013	0.871625
HMDB0029113	NA	Tyr-Pro	0.845966	0.823013	0.871625
HMDB0000925	C01104	Trimethyloxamine	0.766694	0.823013	0.871625
HMDB0259164	C14439	Tributyl Phosphate	0.793922	0.823013	0.871625
NA	NA	Teucroxide	0.806918	0.823013	0.871625
NA	D00154	Santonin	0.946173	0.823013	0.871625
HMDB0014621	C07236	Rimantadine	0.94406	0.823013	0.871625
NA	NA	Propylene Glycol Phenyl Ether	1.33293	0.823013	0.871625
HMDB0000209	C07086	Phenylacetic Acid	0.370622	0.823013	0.871625
NA	NA	PC(17:0/20:4(4Z,7Z,10Z,13Z))	1.47412	0.823013	0.871625
HMDB0013286	NA	N-Undecanoylglycine	0.974116	0.823013	0.871625
HMDB0001539	C03626	N,N-Dimethylarginine	0.96436	0.823013	0.871625
HMDB0041922	C08737	Melamine	1.1478	0.823013	0.871625
HMDB0015082	D01161	Fulvestrant	0.701391	0.823013	0.871625
HMDB0005810	C05631	Eriodictyol	0.94481	0.823013	0.871625
HMDB0036491	C08370	Diallyl Sulfide	0.8744	0.823013	0.871625
HMDB0000630	C00380	Cytosine	0.731522	0.823013	0.871625
NA	NA	Bis(2-Ethylhexyl) Sebacate	0.938084	0.823013	0.871625
HMDB0000517	C00062	Arginine	1.56336	0.823013	0.871625
HMDB0004708	C14833	9,12,13-Trihome	0.66358	0.823013	0.871625
HMDB0060768	NA	4-Hydroxymethylpyrazole	0.951121	0.823013	0.871625
HMDB0000500	C00156	4-Hydroxybenzoate	0.994244	0.823013	0.871625
NA	NA	3-Phenyl-2-(Pyrrolidin-2-Ylformamido)Propanoic Acid	0.664763	0.823013	0.871625
HMDB0040756	NA	3-Hydroxy-6,8-Dimethoxy-7(11)-Eremophilen-12,8-Olide	1.0241	0.823013	0.871625
HMDB0256256	NA	3,6,9,12-Tetraoxatetradecane-1,14-Diol	1.25092	0.823013	0.871625
NA	NA	3,3,3-Trifluoro-1-Propanol	1.08632	0.823013	0.871625
NA	NA	3-(Dodecanoylamino)Propyl(Carboxymethyl)Dimethylammonium	1.11105	0.823013	0.871625
NA	NA	2-Methylpyrrolidine	0.870432	0.823013	0.871625
NA	NA	2-{4-[4-{3,5-Dihydroxy-4-[3,4,5-Trihydroxy-6-(Hydroxymethyl)Oxan-2-YlPhenyl}-2,5-Bis(4-Hydroxyphenyl)Oxolan-3-Yl-2,6-Dihydroxyphenyl}-6-(Hydroxymethyl)Oxane-3,4,5-Triol	1.14348	0.823013	0.871625
NA	NA	2-[(2E)-3,7-Dimethylocta-2,6-Dienyl-3-Methoxy-5-(2-Phenylethyl)Phenol	2.3779	0.823013	0.871625
NA	NA	2,7-Octadienoic Acid, 6-Hydroxy-2,6-Dimethyl-, (1Ar,1Bs,2S,5As,6R,6As)-2-(Beta-D-Glucopyranosyloxy)-1A,1B,2,5A,6,6A-Hexahydro-5A-Hydroxy-1A-Methyloxireno[4,5Cyclopenta[1,2-CPyran-6-Yl Ester, (2E,6S)-	0.542528	0.823013	0.871625
HMDB0244228	C16538	1,5-Anhydrosorbitol	1.20188	0.823013	0.871625
NA	NA	[1,3,12-Triacetyloxy-17-(Furan-3-Yl)-4,4,8,10,13-Pentamethyl-2,3,5,6,7,9,11,12,16,17-Decahydro-1H-Cyclopenta[APhenanthren-7-Yl 2-Hydroxy-3-Methylpentanoate	1.09222	0.823013	0.871625
NA	NA	3-[4-({2-[(2E)-2-Buten-2-Yl-6,8-Dimethyl-1,2,4A,5,6,7,8,8A-Octahydro-1-Naphthalenyl}Carbonyl)-3-Hydroxy-5-Oxo-2,5-Dihydro-1H-Pyrrol-2-Yl-2-Hydroxy-2-Methylpropanoic Acid	0.580067	0.887826	0.922485
NA	NA	(2R,3S,4S,5S,6S)-2-(((2R,3R,4S,5S,6R)-2-Hydroxy-5-(((2R,3R,4R,5S,6R)-5-Hydroxy-4-(((2R,3R,4R,5S,6R)-3,4,5-Trihydroxy-6-(Hydroxymethyl)Tetrahydro-2H-Pyran-2-Yl)Oxy)-3-(((2R,3R,4R,5S)-3,4,5-Trihydroxytetrahydro-2H-Pyran-2-Yl)Oxy)-6-((((2R,3R,4S,5S)-3,4,...	0.774618	0.889066	0.922485
HMDB0029723	C12283	Saccharin	0.753578	0.889357	0.922485
NA	NA	2-((7-Acetamido-1,2,3-Trimethoxy-9-Oxo-5,6,7,9-Tetrahydrobenzo[AHeptalen-10-Yl)Amino)-N-(Furan-2-Ylmethyl)-3-Methylbutanamide	0.382429	0.889357	0.922485
HMDB0000888	NA	Undecanedioic Acid	1.02578	0.893189	0.922485
NA	NA	Triptophenolide	0.743586	0.893189	0.922485
NA	NA	Thr-Val-Leu	0.756747	0.893189	0.922485
HMDB0256502	NA	Phthalimide	1.41646	0.893189	0.922485
NA	NA	Peloruside B	0.955607	0.893189	0.922485
NA	NA	N-[(1E)-2-(3,4,5-Trimethoxyphenyl)-1-Azavinyl-N-(2-Methylphenyl)Butane-1,4-D Iamide	0.708687	0.893189	0.922485
HMDB0029750	NA	Methyl 2-Furoate	1.0006	0.893189	0.922485
HMDB0000761	C03990	Lithocholic Acid	0.979401	0.893189	0.922485
HMDB0036790	C16983	Kobusone	0.99886	0.893189	0.922485
HMDB0012273	NA	Hexadecanamide	1.16402	0.893189	0.922485
HMDB0001397	C00144	GMP	1.13608	0.893189	0.922485
HMDB0000623	C02678	Dodecanedioic acid	1.25644	0.893189	0.922485
HMDB0002151	C11143	Dimethyl Sulfoxide	0.969587	0.893189	0.922485
HMDB0015348	C08159	Anastrozole	1.47521	0.893189	0.922485
HMDB0000045	C00020	Amp	1.66969	0.893189	0.922485
HMDB0240687	C01092	8-Amino-7-Oxononanoic Acid	1.64269	0.893189	0.922485
NA	NA	7-Hydroxy-N-Geranyl-L-Glutamic Acid	0.23102	0.893189	0.922485
NA	NA	4-Hydroxybenzotriazole	0.9285	0.893189	0.922485
HMDB0030770	C10702	4-Hydroxy-3-(3-Methyl-2-Butenyl)Acetophenone	6.49778	0.893189	0.922485
HMDB0061658	NA	3-Hydroxyhexadecanoic Acid	0.899068	0.893189	0.922485
HMDB0245084	NA	2-Cyanoacetamide	1.06764	0.893189	0.922485
NA	NA	2,3,4-Tris[[(E)-3-(3,4-Dihydroxyphenyl)Prop-2-EnoylOxy-5-(2-Methylpropanoyloxy)Hexanedioic Acid	0.777965	0.893189	0.922485
NA	NA	1,7-Dideacetoxy-1,7-Dioxo-3-Deacetylkhivorin	0.940553	0.893189	0.922485
HMDB0061889	NA	(3E,5Z)-1,3,5-Heptatriene	1.02086	0.893189	0.922485
NA	NA	(3,4-Dimethoxyphenyl)-N-[(4-Phenylpiperazinyl)MethylCarboxamide	1.14479	0.893189	0.922485
NA	NA	(2E,4E,14E)-13-Hydroperoxy-1-Piperidin-1-Ylicosa-2,4,14-Trien-1-One	0.92662	0.893189	0.922485
NA	NA	(11S)-14-Ethyl-12-Ethylidene-8,14-Diazapentacyclo[9.5.2.0<1,9.0<2,7.0<14,17 Octadeca-2,4,6,9-Tetraene-10-Carbaldehyde, Iodide	0.951523	0.893189	0.922485
HMDB0047909	NA	TG(14:1(9Z)/16:1(9Z)/16:1(9Z))	0	0.920257	0.949682
NA	NA	Cyclo(Glycyltryptophylprolylglycylvalylglycyl-Beta-Hydroxytyrosyl)	1.21813	0.961639	0.973445
HMDB0246588	NA	4-Thiouridine	0.889229	0.962499	0.973445
NA	NA	Abamectin Component B1A	0.612982	0.962915	0.973445
HMDB0247988	D02763	Actodigin	0.35863	0.963013	0.973445
NA	NA	PFCA-H	2.2486	0.963062	0.973445
HMDB0251214	C14686	Dicyclohexylamine	1.1946	0.963062	0.973445
HMDB0001178	C00301	ADP-ribose	2.50943	0.963062	0.973445
HMDB0006372	NA	L-Glyceric Acid	0.739783	0.964396	0.973445
HMDB0015118	C07805	Formoterol	0.89926	0.964396	0.973445
NA	NA	Ethyl 2-Amino-4-(2,6-Dichlorophenyl)-6-(Hydroxymethyl)-8-Oxo-4H-Pyrano[3,2-BP Yran-3-Carboxylate	1.22293	0.964396	0.973445
NA	NA	6-Acetyloxy-7-Ethenyl-1,4A,7-Trimethyl-3,4,4B,5,6,8,10,10A-Octahydro-2H-Phenanthrene-1-Carboxylic Acid	0.842528	0.964396	0.973445
HMDB0034074	NA	5-Oxooctadecanoic Acid	0.898282	0.964396	0.973445
NA	NA	5,6-Dibenzoyloxy-7-Methyl-1-[3,4,5-Trihydroxy-6-(Hydroxymethyl)Oxan-2-YlOxy-1,4A,5,6,7,7A-Hexahydrocyclopenta[CPyran-4-Carboxylic Acid	1.39939	0.964396	0.973445
NA	NA	4-Methyoxybenzoyl-N-Glycine	1.02839	0.964396	0.973445
HMDB0001044	C00362	2-Deoxyguanosine 5-Phosphate	1.72335	0.964396	0.973445
NA	NA	2-{1-[(4-Chlorophenyl)Carbonyl-5-Methoxy-2-Methylindol-3-Yl}-N-(5-Ethyl(1,3,4 -Thiadiazol-2-Yl))Acetamide	5.38509	0.964396	0.973445
HMDB0013317	NA	Tridecanoylglycine	0.951657	0.964396	0.973445
HMDB0240777	NA	O-(17-Carboxyheptadecanoyl)Carnitine	0.825227	0.964396	0.973445
HMDB0000202	C02170	Methylmalonic Acid	1.15017	0.964396	0.973445
HMDB0011473	NA	LPE(16:0)	0.788968	0.964396	0.973445
HMDB0028913	NA	Isoleucylmethionine	0.310648	0.964396	0.973445
HMDB0000067	C00187	Cholesterol	0.876154	0.964396	0.973445
NA	NA	4-((3S,10R,13R,14S,17R)-3-(((2R,3R,4S,5R,6R)-3,4-Dihydroxy-6-Methyl-5-(((2S,3R,4S,5S,6R)-3,4,5-Trihydroxy-6-(Hydroxymethyl)Tetrahydro-2H-Pyran-2-Yl)Oxy)Tetrahydro-2H-Pyran-2-Yl)Oxy)-14-Hydroxy-10-(Hydroxymethyl)-13-Methylhexadecahydro-1H-Cyclopenta[APhenanthren-17-Yl)Furan-2(5H)-One	0.884207	0.964396	0.973445
NA	NA	3-[(2S,3R,4S,5S,6R)-4,5-Dihydroxy-3-[(2S,3R,4R,5R,6S)-3,4,5-Trihydroxy-6-Methyloxan-2-YlOxy-6-[[(2S,3R,4R,5R,6S)-3,4,5-Trihydroxy-6-Methyloxan-2-YlOxymethylOxan-2-YlOxy-5-Hydroxy-2-(4-Hydroxyphenyl)-6-Methoxy-7-[(2S,3R,4R,5R,6S)-3,4,5-Trihydroxy-6-Methyloxan-2-YlOxychromen-4-One	0.592287	0.964396	0.973445
NA	NA	3-(12-Hydroxy-5,9-Dimethyl-4-Oxo-8-Oxatetracyclo[7.2.1.1~7,10~.0~1,6~Tridec-2-En-5-Yl)Propanoic Acid	1.02458	0.964396	0.973445
NA	NA	2-[1-(4-Methoxyphenyl)(1,2,3,4-Tetrahydrobeta-Carbolin-2-Yl)-N-Naphthylacetam Ide	1.11099	0.964396	0.973445
NA	NA	(E)-3-(Acetyloxymethyl)-5-(2-Formyl-4-Hydroxy-5,5,8A-Trimethyl-1,4,4A,6,7,8-Hexahydronaphthalen-1-Yl)Pent-2-Enoic Acid	1.19659	0.964396	0.973445
HMDB0011506	NA	(2-Aminoethoxy)[(2R)-2-Hydroxy-3-[(9Z)-Octadec-9-EnoyloxyPropoxyPhosphinic Acid	0.347938	0.964396	0.973445
HMDB0014351	C06539	Reserpine	0.478706	1	1
HMDB0031232	NA	Monoethyl Carbonate	1.21886	1	1
HMDB0094660	C14175	Diethyl Phthalate	0.935788	1	1
HMDB0000089	C00475	Cytidine	0.807344	1	1
HMDB0060427	C02659	Acetone Cyanohydrin	1.10459	1	1
HMDB0302281	C08314	9,10-Dihydroxystearic Acid	0.924956	1	1
HMDB0059594	C19970	2-Hydroxy-Damp	2.0428	1	1
NA	NA	20Beta-Hydroxyecdysone	1.17019	1	1
NA	NA	2,3-Dihydroxypropyl 9,12,15-Octadecatrienoate	1.16035	1	1
HMDB0041287	NA	16-Hydroxy-10-Oxohexadecanoic Acid	0.992082	1	1
NA	NA	1-[4-(3,4-Dichlorophenyl)-6-(Trifluoromethyl)Pyrimidin-2-YlPyrrolidine-2-Carb Oxylic Acid	1.24796	1	1
NA	NA	[3,4-Dihydroxy-6-[5-Hydroxy-2-(4-Hydroxyphenyl)-4-Oxo-7-[3,4,5-Trihydroxy-6-(Hydroxymethyl)Oxan-2-YlOxychromen-3-YlOxy-5-[(2S,3R,4R,5R,6S)-3,4,5-Trihydroxy-6-Methyloxan-2-YlOxyoxan-2-YlMethyl Acetate	0.691158	1	1

## Sheet: TB Vs Control
Supplementary Table7 | Lung Metabolite Changes in NTM/TB and Control Groups
HMDBID	KEGGID	Name	FC	Pvalue	FDR
NA	NA	2-(Benzimidazol-2-Ylmethylthio)-5,6-Dimethoxybenzimidazole	0	2.44315e-05	0.00246531
NA	NA	1-{2-[(2-Chlorophenyl)Methyl(1,2,3,4-Tetrahydrobeta-Carbolinyl)}-4-Methoxyben Zene	0	2.44315e-05	0.00246531
NA	C18652	Thiofanox	7.19152	5.15996e-05	0.00246531
HMDB0256846	D01380	Propyphenazone	9.08753	5.15996e-05	0.00246531
HMDB0033251	NA	Phenylmethyl Benzeneacetate	10.6794	5.15996e-05	0.00246531
NA	NA	PC(17:0/18:2(4Z,7Z))	0.305065	5.15996e-05	0.00246531
NA	NA	N-Butylbenzenesulfonamide	0.275716	5.15996e-05	0.00246531
NA	NA	N-{4-[(3,5-Dimethoxyphenyl)CarbonylaminoPhenyl}Acetamide	0.0963247	5.15996e-05	0.00246531
HMDB0245928	NA	M-Toluamide	2.28318	5.15996e-05	0.00246531
HMDB0000227	C00418	Mevalonic Acid	0.0299146	5.15996e-05	0.00246531
HMDB0033319	C10650	Licarin A	15.5935	5.15996e-05	0.00246531
HMDB0000763	C05635	Hydroxyindoleacetic Acid	3.21364	5.15996e-05	0.00246531
HMDB0029488	NA	Gummosin	10.8599	5.15996e-05	0.00246531
HMDB0000661	C00489	Glutaric Acid	0.0258505	5.15996e-05	0.00246531
HMDB0014344	C01912	Erythromycin	0.0309796	5.15996e-05	0.00246531
HMDB0000163	C00208	D-Maltose	0.125512	5.15996e-05	0.00246531
HMDB0250671	NA	Cyclopentylamine	2.88464	5.15996e-05	0.00246531
HMDB0000564	C00157	Colfosceril Palmitate	0.117482	5.15996e-05	0.00246531
HMDB0029709	NA	5,6,7,8-Tetrahydro-4-Methylquinoline	8.715	5.15996e-05	0.00246531
HMDB0240312	C05822	3-Cytidylic Acid	5.3808	5.15996e-05	0.00246531
HMDB0246022	NA	3,4-Diaminopyridine	11.9059	5.15996e-05	0.00246531
NA	NA	3-(5,9-Dimethyl-4-Oxo-8-Oxatetracyclo[7.2.1.1~7,10~.0~1,6~Tridec-2-En-5-Yl)Propanoic Acid	38.3719	5.15996e-05	0.00246531
HMDB0010382	C04102	1-Palmitoyl-Sn-Glycero-3-Phosphocholine	0.116402	5.15996e-05	0.00246531
NA	NA	[6-[6-[6-[4,5-Dihydroxy-6-[(2E,6E)-10-Hydroxy-2,6,10-Trimethyldodeca-2,6,11-Trienoxy-2-Methyloxan-3-YlOxy-4,5-Dihydroxy-2-Methyloxan-3-YlOxy-4,5-Dihydroxy-2-Methyloxan-3-YlOxy-4,5-Dihydroxy-2-Methyloxan-3-Yl Acetate	0.22912	5.15996e-05	0.00246531
NA	NA	[3-Hydroxy-1-[3-Hydroxy-1-Oxo-1-(2,3,4,5,6-Pentahydroxyhexoxy)Decan-5-YlOxy-1-Oxodecan-5-Yl 3,5-Dihydroxydecanoate	79.228	5.15996e-05	0.00246531
NA	NA	[(2R)-1,1,2,3,3-Pentadeuterio-3-Heptadecanoyloxy-2-[(Z)-Tetradec-9-EnoylOxypropyl 2-(Trimethylazaniumyl)Ethyl Phosphate	0.0400449	5.15996e-05	0.00246531
NA	NA	(3R,4R,6S,6As,8R,9R,10S,11S,11Ar,12R,13R)-11A-Acetoxy-4-(2-Chloroacetoxy)-1-Ethyl-9,11-Dihydroxy-6,10,13-Trimethoxy-3-(Methoxymethyl)Tetradecahydro-1H-3,6A,12-(Epiethane[1,1,2Triyl)-7,9-Methanonaphtho[2,3-BAzocin-8-Yl Benzoate	0.0374656	5.15996e-05	0.00246531
HMDB0061006	NA	Norfentanyl	17.0691	0.000103199	0.0039155
HMDB0253658	NA	Lysergol	17.3319	0.000103199	0.0039155
HMDB0062745	C21203	Geranyl Phosphate	7.94493	0.000103199	0.0039155
HMDB0259359	NA	6,7-Dimethoxy-3-Phenylquinoxaline	11.0452	0.000103199	0.0039155
HMDB0000095	C00055	5-CMP	12.4416	0.000103199	0.0039155
NA	NA	4-Hydroxy-3-[(4-Hydroxy-2-Oxo-8-Phenyl(3-Hydroquinolyl))(4-Methylthiophenyl)Me Thyl-1-Phenylhydroquinolin-2-One	0.152387	0.000103199	0.0039155
NA	NA	3-[(2S,3R,4S,5S,6R)-4,5-Dihydroxy-3-[(2S,3R,4R,5R,6S)-3,4,5-Trihydroxy-6-Methyloxan-2-YlOxy-6-[[(2S,3R,4R,5R,6S)-3,4,5-Trihydroxy-6-Methyloxan-2-YlOxymethylOxan-2-YlOxy-5-Hydroxy-2-(4-Hydroxyphenyl)-6-Methoxy-7-[(2S,3R,4R,5R,6S)-3,4,5-Trihydroxy-6-Methyloxan-2-YlOxychromen-4-One	0.0695026	0.000103199	0.0039155
HMDB0041832	C10025	Baicalin	0	0.000111839	0.00412206
HMDB0000288	C00105	UMP	5.13895	0.000206398	0.00451278
HMDB0029835	NA	Tetrahydroharmol	18.996	0.000206398	0.00451278
NA	NA	Psicose	0.333221	0.000206398	0.00451278
HMDB0007949	C00157	PC(15:0/20:4(5Z,8Z,11Z,14Z))	30.7002	0.000206398	0.00451278
HMDB0004825	C04227	Octopamine	5.47513	0.000206398	0.00451278
HMDB0002064	C02714	N-Acetylputrescine	2.78432	0.000206398	0.00451278
HMDB0254615	NA	Methyl Syringate	23.2294	0.000206398	0.00451278
HMDB0010384	C04230	LPC(18:0)	0.124234	0.000206398	0.00451278
HMDB0240262	NA	LPC(16:0)	0.1936	0.000206398	0.00451278
HMDB0253897	NA	L-Isoleucinamide	4.43673	0.000206398	0.00451278
HMDB0006372	NA	L-Glyceric Acid	0.273832	0.000206398	0.00451278
HMDB0001190	C00637	Indole-3-Acetaldehyde	8.42504	0.000206398	0.00451278
HMDB0028898	NA	Histidylvaline	4.66424	0.000206398	0.00451278
HMDB0253179	C05010	Histidiylleucine	95.7848	0.000206398	0.00451278
HMDB0255052	C03137	Acetyltryptophan	39.2165	0.000206398	0.00451278
HMDB0240264	C01297	6-Hydroxypseudooxynicotine	6.06758	0.000206398	0.00451278
NA	NA	3-(4-Hydroxyphenyl)Propanoic Acid 3-(4-Hydroxy-3-Methoxyphenyl)Propyl Ester	10.1362	0.000206398	0.00451278
NA	NA	2-Hydroxy-2-[2-Oxo-2-[(4,7,7-Trimethyl-3-Bicyclo[2.2.1Heptanyl)OxyEthylButanedioic Acid	5.60621	0.000206398	0.00451278
NA	NA	10-Norparvulenone	3.97969	0.000206398	0.00451278
HMDB0244075	NA	1,2-Dihydroisoquinoline	2.08622	0.000206398	0.00451278
NA	NA	1,1-Dimethyl-4-Phenylpiperazinium	11.4713	0.000206398	0.00451278
NA	NA	[3,4-Dihydroxy-6-[5-Hydroxy-2-(4-Hydroxyphenyl)-4-Oxo-7-[3,4,5-Trihydroxy-6-(Hydroxymethyl)Oxan-2-YlOxychromen-3-YlOxy-5-[(2S,3R,4R,5R,6S)-3,4,5-Trihydroxy-6-Methyloxan-2-YlOxyoxan-2-YlMethyl Acetate	0.169955	0.000206398	0.00451278
NA	NA	(3,4-Dimethoxyphenyl)-N-[(4-Phenylpiperazinyl)MethylCarboxamide	22.2585	0.000206398	0.00451278
NA	NA	(+)-Aerugine	0.333205	0.000206398	0.00451278
NA	NA	Ethyl 4-[2-(9-Methyl-6-Oxohydropurin-8-Ylthio)AcetylaminoBenzoate	0	0.000332485	0.00591487
HMDB0029011	NA	Prolylarginine	32.405	0.000361197	0.00591487
HMDB0015095	C07445	Pindolol	20.4365	0.000361197	0.00591487
HMDB0011177	NA	Phe-Pro	5.72495	0.000361197	0.00591487
HMDB0062178	NA	N-Lactoyl-Tryptophan	3.54242	0.000361197	0.00591487
HMDB0001488	C00253	Niacin	5.31406	0.000361197	0.00591487
HMDB0062503	C14789	N-Hydroxy-1-Aminonaphthalene	5.71067	0.000361197	0.00591487
HMDB0011174	NA	Isoleucylproline	5.81826	0.000361197	0.00591487
HMDB0028893	NA	Histidylproline	12.7626	0.000361197	0.00591487
HMDB0000721	NA	Glycylproline	6.3542	0.000361197	0.00591487
HMDB0252461	NA	Forsythoside B	0.173914	0.000361197	0.00591487
NA	C09943	Dendrobine	11.5454	0.000361197	0.00591487
HMDB0000562	C00791	Creatinine	0.577805	0.000361197	0.00591487
HMDB0302107	C19620	9,10-Epoxy-18-Hydroxy-Octadecanoic Acid	0.402029	0.000361197	0.00591487
HMDB0304210	C00906	5,6-Dihydrothymine	1.83181	0.000361197	0.00591487
HMDB0245114	NA	2-Ethyl-3-Hydroxy-2,4,4-Trimethyloxazolidine	0.167928	0.000361197	0.00591487
NA	NA	2-Butanone, 4-[3-(Beta-D-Glucopyranosyloxy)-4-Hydroxy-2,6,6-Trimethyl-1-Cyclohexen-1-Yl-	3.0218	0.000361197	0.00591487
HMDB0244231	C19463	1,5-Naphthalenediamine	2.23449	0.000361197	0.00591487
HMDB0243498	NA	1-(3-Carboxypropyl)-3,7-Dimethylxanthine	4.68381	0.000361197	0.00591487
HMDB0000397	C00196	Dihydroxy-Benzoic Acid	0	0.000362228	0.00591487
HMDB0000258	C00089	Sucrose	0.00369536	0.000470026	0.00757917
NA	NA	[(2S,3S,4R,5R,6R)-5-Acetyloxy-3-Hydroxy-2-Methyl-6-[[(2R,3S,4S,5R,6S)-3,4,5-Trihydroxy-6-[5-Hydroxy-6-Methoxy-2-(4-Methoxyphenyl)-4-Oxochromen-7-YlOxyoxan-2-YlMethoxyOxan-4-Yl Acetate	0	0.000509155	0.00810877
HMDB0244873	NA	2H-Benzotriazole	0.00456162	0.000522771	0.008125
HMDB0062195	C04598	1-Hexadecyl-2-Acetyl-Glycero-3-Phosphocholine	0.0330761	0.000522771	0.008125
NA	NA	3-[(2S,3R,4S,5R,6R)-4-[(2S,3R,4S,5S,6R)-4,5-Dihydroxy-6-(Hydroxymethyl)-3-[(2S,3R,4S,5R)-3,4,5-Trihydroxyoxan-2-YlOxyoxan-2-YlOxy-3,5-Dihydroxy-6-(Hydroxymethyl)Oxan-2-YlOxy-2-(3,4-Dihydroxyphenyl)-5,7-Dihydroxychromen-4-One	0.102631	0.000562892	0.00840802
NA	NA	1-[4,5-Bis(Hydroxymethyl)-3-Methoxy-2-Methylphenoxy-3-Methylbutane-2,3-Diol	32.3082	0.000607998	0.00840802
NA	NA	Theaflavin Monogallate A	0.159299	0.000616726	0.00840802
HMDB0010169	C00550	SM(d18:1/16:0)	7.67362	0.000619195	0.00840802
HMDB0029135	NA	Prolylvaline	10.874	0.000619195	0.00840802
HMDB0029838	C06537	Harmalol	6.42614	0.000619195	0.00840802
HMDB0000759	C02155	Glycylleucine	5.78608	0.000619195	0.00840802
NA	NA	6-Amino-4-(4-Hydroxyphenyl)-3-Propyl-4H-Pyrano[3,2-DPyrazole-5-Carbonitrile	11.4981	0.000619195	0.00840802
HMDB0031256	NA	4-Hydroxy-2H-Pyran-3-Carboxaldehyde	3.41859	0.000619195	0.00840802
NA	NA	4-((3S,10R,13R,14S,17R)-3-(((2R,3R,4S,5R,6R)-3,4-Dihydroxy-6-Methyl-5-(((2S,3R,4S,5S,6R)-3,4,5-Trihydroxy-6-(Hydroxymethyl)Tetrahydro-2H-Pyran-2-Yl)Oxy)Tetrahydro-2H-Pyran-2-Yl)Oxy)-14-Hydroxy-10-(Hydroxymethyl)-13-Methylhexadecahydro-1H-Cyclopenta[APhenanthren-17-Yl)Furan-2(5H)-One	0.328835	0.000619195	0.00840802
NA	NA	2-Methylpyrrolidine	9.29876	0.000619195	0.00840802
NA	NA	2-(2,3-Dimethyl-Phenylamino)-Nicotinic Acid	6.58747	0.000619195	0.00840802
NA	NA	Ethyl 2-{3-Methyl-7-[(3-Methylphenyl)Methyl-2,6-Dioxo-1,3,7-Trihydropurin-8-Y Lthio}Acetate	0.00574991	0.000711204	0.00955681
NA	NA	2-Methoxyethyl 5-Hydroxy-2-Methyl-1-{3-[(4-Nitrophenyl)AminoPropyl}Benzo[GIn Dole-3-Carboxylate	0.0203508	0.00079937	0.0106308
NA	NA	6-Hydroxymethyl-2,2-Dimethyl-Dihydro-Furo(3,4-D)(1,3)Dioxol-4-One	0.0674343	0.000821586	0.0108148
HMDB0001178	C00301	ADP-ribose	14.3507	0.000832849	0.0108523
HMDB0006351	NA	Vaccenyl Carnitine	0	0.000950693	0.0109026
HMDB0240845	NA	5-Methylpentadecanoylcarnitine	0	0.000950693	0.0109026
HMDB0029130	NA	Val-Ile	6.55586	0.000980392	0.0109026
NA	NA	Sparteine-15-Carboxylic Acid	15.1453	0.000980392	0.0109026
HMDB0004610	C12144	Phytosphingosine	3.97805	0.000980392	0.0109026
HMDB0242427	NA	Mesaconine	13.268	0.000980392	0.0109026
HMDB0000197	C00954	Indole-3-Acetic Acid	3.99613	0.000980392	0.0109026
HMDB0028897	NA	Histidyltyrosine	8.94057	0.000980392	0.0109026
HMDB0014474	C06984	Ethambutol	14.9093	0.000980392	0.0109026
HMDB0247457	NA	8-Oxo-7,8-Dihydrodeoxyguanine	7.53222	0.000980392	0.0109026
HMDB0061654	NA	3-Hydroxyundecanoic Acid	0.0415755	0.000980392	0.0109026
NA	NA	3-(2-Hydroxyethyl)-1H,3H-Quinazoline-2,4-Dione	3.7959	0.000980392	0.0109026
HMDB0060677	C11004	2,6-Xylidine	5.13067	0.000980392	0.0109026
NA	NA	[(2R,3S,4S,5R,6R)-6-[1,7-Bis(3,4-Dihydroxyphenyl)-5-Oxoheptan-3-YlOxy-3,4,5-Trihydroxyoxan-2-YlMethyl (E)-3-(3,4-Dimethoxyphenyl)Prop-2-Enoate	0.226506	0.000980392	0.0109026
HMDB0010728	NA	(R)-3-Hydroxydodecanoic Acid	0.0952201	0.000980392	0.0109026
NA	NA	(2S,4R,9Beta,16Alpha,17Xi,23E)-2-(Beta-D-Glucopyranosyloxy)-16,20-Dihydroxy-9,10,14-Trimethyl-1,11,22-Trioxo-4,9-Cyclo-9,10-Secocholesta-5,23-Dien-25-Yl Acetate	0.297502	0.000980392	0.0109026
NA	NA	(1As,2Z,4E,14R,15As)-8-Chloro-9,11-Dihydroxy-14-Methyl-1A,14,15,15A-Tetrahydro-6H-Oxireno[E[2Benzoxacyclotetradecine-6,12(7H)-Dione	0.0955896	0.000980392	0.0109026
HMDB0259784	C08252	Verbascose	0.248155	0.00111754	0.0123216
HMDB0246552	C00185	Cellobiose	0.00705437	0.00117671	0.0128641
HMDB0013253	C05135	N-Acetylhistamine	0.181069	0.00137631	0.0136774
HMDB0002545	C00333	D-Galacturonic Acid	0.170604	0.00143542	0.0136774
NA	NA	N-(2,4-Dimethylphenyl)Acetamide	26.186	0.00147167	0.0136774
HMDB0000656	C05526	Cysteineglutathione Disulfide	0.0753752	0.00147167	0.0136774
HMDB0035141	NA	Oseltamivir Acid	4.43611	0.00149002	0.0136774
HMDB0029113	NA	Tyr-Pro	12.7965	0.00154799	0.0136774
HMDB0000933	C16308	Traumatic Acid	0.466654	0.00154799	0.0136774
HMDB0031087	NA	Trans-2-Hexyl-1-Cyclopropaneacetic Acid	0.343537	0.00154799	0.0136774
HMDB0029046	NA	Ser-Phe	6.19846	0.00154799	0.0136774
NA	NA	Peloruside B	12.714	0.00154799	0.0136774
HMDB0011730	C08243	Melezitose	0.190934	0.00154799	0.0136774
HMDB0028942	NA	Leu-Val	8.58006	0.00154799	0.0136774
HMDB0028853	NA	Gly-Tyr	6.59184	0.00154799	0.0136774
HMDB0015118	C07805	Formoterol	10.3575	0.00154799	0.0136774
HMDB0000012	C00526	Deoxyuridine	0.235129	0.00154799	0.0136774
NA	NA	Bovoside A	11.6933	0.00154799	0.0136774
HMDB0028716	NA	Arginylphenylalanine	9.01932	0.00154799	0.0136774
HMDB0000517	C00062	Arginine	0.306276	0.00154799	0.0136774
HMDB0028694	NA	Alanylphenylalanine	8.06412	0.00154799	0.0136774
NA	NA	Alanylnorvaline	5.73775	0.00154799	0.0136774
HMDB0252077	NA	6-Oxo-Butanal	1.71948	0.00154799	0.0136774
NA	NA	6,8-Bis(Morpholino-4-Iummethyl)-4-Oxo-3-(4-(((2S,3R,4S,5S,6R)-3,4,5-Trihydroxy-6-(Hydroxymethyl)Tetrahydro-2H-Pyran-2-Yl)Oxy)Phenyl)-4H-Chromene-5,7-Bis(Olate)	0.212966	0.00154799	0.0136774
HMDB0039332	NA	2-(6-P-Coumaroylglucosyl)Quercitrin	0.323617	0.00154799	0.0136774
HMDB0251509	NA	2-(2-Aminopropanamido)-4-Methylpentanoic Acid	9.16895	0.00154799	0.0136774
HMDB0243989	NA	1-Pentyl-3-(1-Naphthoyl) Indole	13.8653	0.00154799	0.0136774
HMDB0244880	NA	1H-Imidazole-4-Carboxamide	3.05792	0.00154799	0.0136774
NA	NA	[(3Ar,4R,5R,6Z,9Z,11Ar)-4-Hydroxy-6,10-Dimethyl-3-Methylidene-2,8-Dioxo-4,5,11,11A-Tetrahydro-3Ah-Cyclodeca[BFuran-5-Yl (Z)-2-Methylbut-2-Enoate	0.126475	0.00154799	0.0136774
NA	NA	(Z)-3-(4-Hydroxyphenyl)-N-[4-[[(E)-3-(4-Hydroxyphenyl)Prop-2-EnoylAminoButylProp-2-Enamide	4.60208	0.00154799	0.0136774
HMDB0244280	NA	N(4)-Acetylsulfamethazine	0	0.00165917	0.0145601
HMDB0041993	NA	Pivaloylcarnitine	0.0283132	0.00172167	0.0150065
NA	NA	Biotin Methyl Ester	0	0.00181703	0.0157272
HMDB0002815	C03916	1-(9Z-Octadecenoyl)-Sn-Glycero-3-Phosphocholine	0.170663	0.00183031	0.0157272
HMDB0061822	NA	Hexaethylene Glycol	0	0.00184094	0.0157272
HMDB0253233	C09866	Huperzine B	15.2848	0.00195088	0.016362
HMDB0060655	C16560	3-Hydroxylidocaine	4.43994	0.00197403	0.016362
HMDB0040329	NA	Xi-5-Hydroxydecanoic Acid	0.58126	0.00227038	0.016362
HMDB0029140	NA	Valylvaline	8.66911	0.00227038	0.016362
NA	NA	Val-Gly-Val	11.5679	0.00227038	0.016362
HMDB0029118	NA	Tyr-Val	7.88418	0.00227038	0.016362
NA	NA	Thr-Val-Leu	16.8794	0.00227038	0.016362
HMDB0029043	NA	Ser-Leu	5.99023	0.00227038	0.016362
HMDB0031608	D03467	Peracetic Acid	1.83309	0.00227038	0.016362
HMDB0028848	NA	Glycyl-L-Phenylalanine	5.68012	0.00227038	0.016362
HMDB0000131	C00116	Glycerol	0.0331146	0.00227038	0.016362
HMDB0000085	C00330	Deoxyguanosine	7.38375	0.00227038	0.016362
HMDB0000064	C00300	Creatine	0.652292	0.00227038	0.016362
NA	NA	Benzododecinium	5.52461	0.00227038	0.016362
HMDB0243703	NA	Alpha-Methyl-4-Carboxyphenylglycine	0.0382164	0.00227038	0.016362
HMDB0248216	C05402	6-O-(Alpha-D-Galactopyranosyl)-D-Glucopyranose	0.148943	0.00227038	0.016362
HMDB0002894	C02376	5-Methylcytosine	1.8908	0.00227038	0.016362
HMDB0000472	C01017	5-Hydroxytryptophan	3.5936	0.00227038	0.016362
NA	NA	3-(12-Hydroxy-5,9-Dimethyl-4-Oxo-8-Oxatetracyclo[7.2.1.1~7,10~.0~1,6~Tridec-2-En-5-Yl)Propanoic Acid	2.43861	0.00227038	0.016362
NA	NA	2-Methoxy-6-[(Triphenylmethoxy)Methyl-2H-3,4,5,6-Tetrahydropyran-3,4,5-Triol	0.246002	0.00227038	0.016362
HMDB0245134	NA	2-Furancarboximidamide	2.62277	0.00227038	0.016362
HMDB0011692	C03104	2-CMP	2.49176	0.00227038	0.016362
NA	NA	2-{4-[4-{3,5-Dihydroxy-4-[3,4,5-Trihydroxy-6-(Hydroxymethyl)Oxan-2-YlPhenyl}-2,5-Bis(4-Hydroxyphenyl)Oxolan-3-Yl-2,6-Dihydroxyphenyl}-6-(Hydroxymethyl)Oxane-3,4,5-Triol	0.160279	0.00227038	0.016362
NA	NA	2,3,3,4,4,4-Hexafluorobutanoic Acid	2.30729	0.00227038	0.016362
HMDB0028738	NA	2-(2-Amino-3-Carbamoylpropanamido)-3-Phenylpropanoic Acid	7.14492	0.00227038	0.016362
HMDB0243876	NA	1-Ethylpiperazine	4.1358	0.00227038	0.016362
NA	NA	[2-[(Z)-Heptadec-9-EnoylOxy-3-Hexadecanoyloxypropyl 2-(Trimethylazaniumyl)Ethyl Phosphate	0.351767	0.00227038	0.016362
NA	NA	(2E)-3-[5-(3,4-Dichlorophenyl)(2-Furyl)-2-(2-1,2,3,4-Tetrahydroisoquinolylcar Bonyl)Prop-2-Enenitrile	0.211355	0.00227038	0.016362
NA	NA	2,2,6,6-Tetramethyl-5-Hydroxy-4-(Alpha-Isopropyl-2,4,6-Trihydroxy-3-Isobutyrylbenzyl)-4-Cyclohexene-1,3-Dione	0.0215557	0.00277474	0.0198856
HMDB0252399	C10967	Fluperlapine	9.2248	0.00297464	0.0208548
NA	NA	6-Acetyloxy-7-Ethenyl-1,4A,7-Trimethyl-3,4,4B,5,6,8,10,10A-Octahydro-2H-Phenanthrene-1-Carboxylic Acid	10.9015	0.00297464	0.0208548
NA	NA	3-Methyl-7-[(3-Methylphenyl)Methyl-8-Nonylthio-1,3,7-Trihydropurine-2,6-Dione	15.2056	0.00297464	0.0208548
NA	NA	1,7-Dideacetoxy-1,7-Dioxo-3-Deacetylkhivorin	7.87466	0.00297464	0.0208548
HMDB0062701	NA	TG(17:0/18:1/18:1)	0.0398891	0.00330237	0.0209855
HMDB0003219	C02076	Sedoheptulose	0.0196862	0.00330237	0.0209855
NA	NA	N-Fructosyl Isoleucylglutamate	5.66649	0.00330237	0.0209855
HMDB0061384	NA	N-(3-Acetamidopropyl)Pyrrolidin-2-One	0.297111	0.00330237	0.0209855
NA	NA	N-(((1S,9Ar)-Octahydro-1H-Quinolizin-1-Yl)Methyl)-5-(Pyridin-3-Yl)-1H-Pyrazole-3-Carboxamide	9.79332	0.00330237	0.0209855
NA	NA	Myristamine Oxide	2.49559	0.00330237	0.0209855
HMDB0028955	NA	Lys-Leu	6.75054	0.00330237	0.0209855
HMDB0028928	NA	Leu-Glu	8.12786	0.00330237	0.0209855
HMDB0028941	NA	Leucyl-Tyrosine	9.80403	0.00330237	0.0209855
HMDB0005768	C02993	Kyotorphin	14.1425	0.00330237	0.0209855
HMDB0028903	NA	Isoleucylaspartate	6.10518	0.00330237	0.0209855
NA	NA	Ethyl 2-Amino-4-(2,6-Dichlorophenyl)-6-(Hydroxymethyl)-8-Oxo-4H-Pyrano[3,2-BP Yran-3-Carboxylate	4.90939	0.00330237	0.0209855
NA	NA	Difluoro(Perfluoromethoxy)Acetic Acid	0.815642	0.00330237	0.0209855
NA	NA	C17-Sphinganine	5.31811	0.00330237	0.0209855
NA	NA	Beta- Belladonnine Dichloroethylate	8.61574	0.00330237	0.0209855
HMDB0245972	NA	3-Phenylacetylamino-2,6-Piperidinedione	23.6965	0.00330237	0.0209855
HMDB0061657	NA	3-Hydroxypentadecanoic Acid	0.120615	0.00330237	0.0209855
NA	NA	2,4-Dihydroxy-4-[(1E)-3-Hydroxy-1-Buten-1-Yl-3,5,5-Trimethylcyclohexyl Beta-D-Glucopyranoside	9.11125	0.00330237	0.0209855
HMDB0244077	NA	1,2-Dihydroquinoline	3.43233	0.00330237	0.0209855
NA	NA	Scutellarin	0	0.00334414	0.0210436
HMDB0029415	C03727	Carbocysteine	0	0.00334414	0.0210436
HMDB0248216	NA	Beta-Gentiobiose	0	0.00430842	0.0260466
HMDB0000290	C00043	UDP-Glcnac	7.16548	0.00437466	0.0260466
NA	NA	Lactarorufin B	6.05368	0.00437466	0.0260466
HMDB0060441	C05340	Beta-Alanyl-L-Arginine	8.89715	0.00437466	0.0260466
NA	NA	26-Deoxycimicifugoside	0.0636816	0.00441913	0.0260466
HMDB0000262	C00178	Thymine	2.94972	0.00464396	0.0260466
NA	NA	Teucroxide	3.82032	0.00464396	0.0260466
HMDB0029052	NA	Ser-Val	8.67774	0.00464396	0.0260466
NA	NA	Pyroglu-Ile-Arg	9.8737	0.00464396	0.0260466
HMDB0014730	C07973	Piperazine	3.41648	0.00464396	0.0260466
NA	NA	Nafadotride	6.50961	0.00464396	0.0260466
HMDB0011745	C02712	N-Acetylmethionine	14.0018	0.00464396	0.0260466
HMDB0028977	NA	Methionyl-Leucine	24.0526	0.00464396	0.0260466
HMDB0011111	C00222	Malonic Semialdehyde	0.307211	0.00464396	0.0260466
HMDB0010385	C04230	LPC(18:1)	0.342328	0.00464396	0.0260466
HMDB0028939	NA	Leu-Thr	6.87075	0.00464396	0.0260466
HMDB0028927	NA	Leucyl-Glutamine	5.04783	0.00464396	0.0260466
NA	NA	Lauramine Oxide	2.78644	0.00464396	0.0260466
HMDB0252911	C17816	Gomisin D	0.514243	0.00464396	0.0260466
HMDB0001151	C01487	Allose	0.28823	0.00464396	0.0260466
NA	NA	8-[(2-Chlorophenyl)Methylthio-3-Methyl-7-[(3-Methylphenyl)Methyl-1,3,7-Trihy Dropurine-2,6-Dione	0.0599468	0.00464396	0.0260466
HMDB0245117	NA	2-Ethylaniline	4.47942	0.00464396	0.0260466
NA	NA	2-{1-[(4-Chlorophenyl)Carbonyl-5-Methoxy-2-Methylindol-3-Yl}-N-(2-Pyridylmeth Yl)Acetamide	0.122203	0.00464396	0.0260466
HMDB0011691	C00127	2,3 Cyclic-Cmp	5.2729	0.00464396	0.0260466
NA	NA	2-(4-Amino-4-Carboxybutanamido)-4-Methylpentanoic Acid	4.34064	0.00464396	0.0260466
HMDB0003213	C00492	Raffinose	0	0.00494902	0.0276374
NA	NA	5-Hydroxymethyluridine	0.13287	0.00536855	0.029851
HMDB0031702	NA	1-Piperidinecarboxaldehyde	0.0720215	0.00565404	0.0313035
NA	NA	N-[(1E)-2-(3,4,5-Trimethoxyphenyl)-1-Azavinyl-N-(2-Methylphenyl)Butane-1,4-D Iamide	10.5332	0.00570848	0.0313359
NA	NA	3-Indol-3-Yl-2-{[(7-Methyl-3-Oxo(2H,4H-Benzo[3,4-E1,4-Oxazaperhydroin-6-Yl))S UlfonylAmino}Propanoic Acid	6.68091	0.00570848	0.0313359
NA	NA	Smenospongine	0	0.00581232	0.0317707
HMDB0011729	C03661	1-Kestose	0.0461261	0.00616574	0.0325138
HMDB0000792	C08277	Sebacic Acid	4.00342	0.00644995	0.0325138
HMDB0014483	C01956	Pyrazinamide	44.251	0.00644995	0.0325138
HMDB0029015	NA	Pro-Gln	12.8055	0.00644995	0.0325138
HMDB0304787	NA	Phenylalanylalanine	9.32534	0.00644995	0.0325138
NA	NA	N-(2,4-Dimethylphenyl)Formamide	5.29492	0.00644995	0.0325138
HMDB0028964	NA	Lysylvaline	3.74423	0.00644995	0.0325138
HMDB0003466	C01040	L-Gulonolactone	0.270969	0.00644995	0.0325138
NA	NA	Lauryldiethanolamine	2.17646	0.00644995	0.0325138
HMDB0028916	NA	Isoleucylserine	7.37414	0.00644995	0.0325138
HMDB0029737	C08493	Indole-3-Carbaldehyde	1.56684	0.00644995	0.0325138
HMDB0002271	C20522	Imidazolepropionic Acid	2.21368	0.00644995	0.0325138
HMDB0014447	C12535	Cyclohexanecarboxylic Acid, 4-(Aminomethyl)-	0.327559	0.00644995	0.0325138
HMDB0061658	NA	3-Hydroxyhexadecanoic Acid	0.603976	0.00644995	0.0325138
NA	NA	2-(2-Amino-3-Phenylpropanamido)-3-Methylbutanoic Acid	9.98129	0.00644995	0.0325138
NA	NA	1,3,7-Trimethyl-9-Hydroxy-9H-Purine-2,6,8(1H,3H,7H)-Trione	0.255222	0.00644995	0.0325138
NA	NA	[(2R,3S,4S,5R,6S)-3,4-Dihydroxy-6-[3,7,8-Trihydroxy-2-(4-Hydroxy-3-Methoxyphenyl)-4-Oxochromen-5-YlOxy-5-[(2S,3R,4R,5R,6S)-3,4,5-Trihydroxy-6-Methyloxan-2-YlOxyoxan-2-YlMethyl Acetate	0.230303	0.00644995	0.0325138
HMDB0003033	D03363	(9S,14S)-10,13-Dimethylspiro[2,8,9,11,12,14,15,16-Octahydro-1H-Cyclopenta[APhenanthrene-17,5-Oxolane-2,3-Dione	0.406322	0.00644995	0.0325138
NA	NA	(2R)-2-[(2R,5S)-5-[(2S)-2-HydroxybutylOxolan-2-YlPropanoic Acid	7.67211	0.00644995	0.0325138
NA	NA	Ethyl 3-{N-[2-(N-Phenylcarbamoyl)PhenylCarbamoyl}Propanoate	0	0.00645236	0.0325138
HMDB0029001	NA	Phe-Met	0	0.00653183	0.0327862
NA	NA	N-Fructosyl Isoleucine	156.386	0.00691439	0.034572
NA	NA	Quinelorane Dihydrochloride	0	0.00726985	0.0360696
NA	NA	(2R,4S,5R)-4-[(2S,4S,5R)-4-[(2S,4S,5R)-4-[(2S,4S,5R)-3,5-Dihydroxy-6-(Hydroxymethyl)-4-[(2S,4R,5S)-3,4,5-Trihydroxy-6-(Hydroxymethyl)Oxan-2-YlOxyoxan-2-YlOxy-3,5-Dihydroxy-6-(Hydroxymethyl)Oxan-2-YlOxy-3,5-Dihydroxy-6-(Hydroxymethyl)Oxan-2-YlOxy-6-(Hydroxymethyl)Oxane-2,3,5-Triol	0	0.00726985	0.0360696
NA	NA	N-(5-Chloro-2-Methoxyphenyl)-2-[9-(4-Methylphenyl)-6-Oxohydropurin-8-YlthioAc Etamide	8.34003	0.00732791	0.0362184
NA	C18885	Propamocarb	0	0.00773677	0.0380933
HMDB0243512	D01371	Vinpocetine	9.56269	0.00828306	0.040628
HMDB0029065	NA	Thr-Leu	9.2616	0.00872033	0.0409063
NA	NA	PC(17:0/20:4(4Z,7Z,10Z,13Z))	0.189585	0.00872033	0.0409063
HMDB0000169	C00159	Mannose	0.130292	0.00872033	0.0409063
NA	NA	Isoevernic Acid	0.105521	0.00872033	0.0409063
NA	NA	Descladinose Azithromycin	10.2097	0.00872033	0.0409063
HMDB0031407	C00557	Cyclopentanone	2.1495	0.00872033	0.0409063
NA	NA	Crocacin C	4.45957	0.00872033	0.0409063
NA	C18817	Chlorotoluron	3.31068	0.00872033	0.0409063
HMDB0015348	C08159	Anastrozole	5.2613	0.00872033	0.0409063
HMDB0246419	NA	4-Ethylaniline	6.08622	0.00872033	0.0409063
HMDB0245325	NA	2-Vinylpyridine	4.11524	0.00872033	0.0409063
NA	NA	2-[1-(4-Methoxyphenyl)(1,2,3,4-Tetrahydrobeta-Carbolin-2-Yl)-N-Naphthylacetam Ide	4.52529	0.00872033	0.0409063
NA	NA	6-O-(4-Hydroxycinnamoyl)-Beta-D-Glucopyranose 1,2-Bis(3,4,5-Trihydroxybenzoate)	0.0300185	0.00884899	0.0413594
NA	NA	8-(Diethylamino)Octyl-3,4,5-Trimethoxybenzoate Hydrochloride53464-72-5	14.3323	0.0092684	0.0429203
NA	NA	Methylethyl 6-(3-Bromo-4-Hydroxy-5-Methoxyphenyl)-3-Ethyl-4-Methyl-2-Oxo-1,3,6 -Trihydropyrimidine-5-Carboxylate	0.0306621	0.00934812	0.0429203
HMDB0014989	C06936	Dacarbazine	0.109673	0.00934812	0.0429203
HMDB0001262	C01835	Maltotriose	0	0.0093493	0.0429203
NA	NA	Alpha-Maltotriose	0	0.0093493	0.0429203
NA	NA	Teraspiridole C	Inf	0.0101613	0.0464826
HMDB0028902	NA	2-(2-Amino-3-Methylpentanamido)-3-Carbamoylpropanoic Acid	8.02926	0.0105337	0.0480158
HMDB0000350	NA	3-Hydroxysebacic Acid	48.7837	0.0115663	0.0482745
NA	NA	2,4-Di-O-Methylolivetonide	0.0209048	0.0115663	0.0482745
HMDB0034146	C13846	Stearic Acid Amide	0.582134	0.0117131	0.0482745
HMDB0000926	C00747	Pyridine	0.459703	0.0117131	0.0482745
HMDB0033482	NA	Plantagonine	2.70132	0.0117131	0.0482745
HMDB0028994	NA	Phenylalanylglutamate	3.28027	0.0117131	0.0482745
NA	NA	PFSM-ammonio	0.0533102	0.0117131	0.0482745
HMDB0028922	NA	Leucyl-Alanine	7.05898	0.0117131	0.0482745
HMDB0000684	C00328	Kynurenine	1.45783	0.0117131	0.0482745
NA	NA	Koninginin E	4.11808	0.0117131	0.0482745
HMDB0242615	C10696	Hydroquinidine	9.56212	0.0117131	0.0482745
NA	NA	Hex-Naringenin (Put)	0.136581	0.0117131	0.0482745
HMDB0012273	NA	Hexadecanamide	0.519839	0.0117131	0.0482745
HMDB0028832	NA	Glutamylvaline	5.44055	0.0117131	0.0482745
HMDB0245221	C18653	DNOC	0.241632	0.0117131	0.0482745
NA	NA	Dereplicator Identification - Heptaibin	2.35809	0.0117131	0.0482745
HMDB0000630	C00380	Cytosine	5.85891	0.0117131	0.0482745
HMDB0000089	C00475	Cytidine	7.25391	0.0117131	0.0482745
HMDB0031342	C09822	Cyclohexanecarboxylic Acid	0.794663	0.0117131	0.0482745
HMDB0000201	C02571	Acetyl-L-Carnitine	0.603219	0.0117131	0.0482745
NA	NA	7-Benzyloxytryptamine	2.74535	0.0117131	0.0482745
HMDB0004081	C05643	6-Hydroxymelatonin	6.31042	0.0117131	0.0482745
HMDB0006955	C04604	3-Hydroxy-2-Methylpyridine-4,5-Dicarboxylate	0.321724	0.0117131	0.0482745
HMDB0303058	NA	2-Phenylethyl 6-O-(6-Deoxy-Alpha-L-Mannopyranosyl)-Beta-D-Glucopyranoside	6.49019	0.0117131	0.0482745
NA	NA	2-Oxo-1H-Quinoline-4-Carboxylic Acid	7.72686	0.0117131	0.0482745
NA	NA	2-[5-[2-[2-[5-(2-Hydroxybutyl)Oxolan-2-YlPropanoyloxyButylOxolan-2-YlPropanoic Acid	10.811	0.0117131	0.0482745
HMDB0028844	NA	2-(2-Aminoacetamido)-3-Methylpentanoic Acid	8.35208	0.0117131	0.0482745
NA	NA	16-Butan-2-Yl-10,11,14-Trimethyl-13-Propan-2-Yl-3-Prop-2-Enyl-4-Oxa-1,8,11,14,17-Pentazabicyclo[17.3.0Docosane-2,5,9,12,15,18-Hexone	2.37144	0.0117131	0.0482745
HMDB0244157	NA	1,3-Benzodioxole-5,6-Diamine	2.12343	0.0117131	0.0482745
NA	NA	(2R,3R,11Bs)-2-[(6,7-Dimethoxy-3,4-Dihydroisoquinolin-1-Yl)Methyl-3-Ethyl-9,10-Dimethoxy-2,3,4,6,7,11B-Hexahydro-1H-Pyrido[2,1-AIsoquinoline	8.01012	0.0117131	0.0482745
NA	NA	3,5,7,10,15-O-Pentacetyl-14-O-Benzoyl-10,18-Dihydromyrsinol	0.109147	0.0118512	0.0486881
HMDB0256083	C01742	Palatinose	0	0.0119439	0.0489132
NA	NA	(1R,4S,7S,8S,9R,12E,20R,21R,22S,23S)-7,8,21,22,23-Pentahydroxy-12,16-Dimethyl-3,5,10,19,24-Pentaoxatricyclo[18.3.1.04,9Tetracos-12-En-11-One	0	0.0130361	0.0532171
HMDB0240345	NA	N2,N5-Diacetylornithine	4.46847	0.0133128	0.0541753
HMDB0028911	NA	Isoleucylleucine	0	0.0135927	0.0551403
NA	NA	Beta-D-Glucopyranose, 1-O-[(2Alpha,3Beta,5Xi,9Xi,18Xi)-2,3,19-Trihydroxy-28-Oxours-12-En-28-Yl-	40.8417	0.0142214	0.0575097
NA	C18785	Dinitramine	7.47399	0.0145933	0.0579997
HMDB0010386	C04100	1-(9Z,12Z-Octadecadienoyl)-Sn-Glycero-3-Phosphocholine	0.0739608	0.0145933	0.0579997
NA	NA	O-Trimethoxy-3,4,5-Benzoyl-Oh-Vincamajine	0	0.0147297	0.0579997
NA	NA	5,7-Dimethyl-4-(2-1,2,3,4-Tetrahydroisoquinolylmethyl)Chromen-2-One	31.3441	0.0148184	0.0579997
NA	NA	10,11-Dimethoxy-4A,5,5A,7,8,13A,15,15A,15B,16-Decahydro-2H-4,6-Methanoindolo[3,2,1-IjOxepino[2,3,4-DePyrrolo[2,3-HQuinoline-14-One	7.88753	0.0148184	0.0579997
NA	NA	1-(2-(2H,3H-Benzo[3,4-E1,4-Dioxin-6-Yl)-2-Oxoethyl)Benzimidazole-2-Carbonitri Le	0.0216909	0.0148184	0.0579997
HMDB0015017	C12599	Racivir	0	0.0151579	0.0579997
HMDB0304820	C05944	Pantothenol	0	0.0153732	0.0579997
NA	NA	Triacetylfusarinine C	0.042077	0.0153767	0.0579997
HMDB0013312	NA	Trans-3-Octenedioic Acid	0.822238	0.0153767	0.0579997
HMDB0003070	C00493	Shikimic Acid	2.76621	0.0153767	0.0579997
HMDB0006088	C06153	Scyllo-Inositol	0.21977	0.0153767	0.0579997
HMDB0245113	C07499	Phenylethylmalonamide	0.312056	0.0153767	0.0579997
HMDB0000209	C07086	Phenylacetic Acid	2.54262	0.0153767	0.0579997
HMDB0000156	C00149	Malic Acid	0.566112	0.0153767	0.0579997
HMDB0252931	C08901	Gracillin	2.66174	0.0153767	0.0579997
HMDB0000128	C00581	Glycocyamine	6.70719	0.0153767	0.0579997
HMDB0000097	C00114	Choline	1.49807	0.0153767	0.0579997
HMDB0302856	C08268	Baikiain	1.68527	0.0153767	0.0579997
NA	NA	3-Phenyl-2-(Pyrrolidin-2-Ylformamido)Propanoic Acid	9.02375	0.0153767	0.0579997
HMDB0038055	NA	2-Hydroxy-7-Methoxy-2H-1,4-Benzoxazin-3(4H)-One	4.26389	0.0153767	0.0579997
HMDB0032619	C07112	1-Phenylethanol	2.05517	0.0153767	0.0579997
NA	NA	(2-Isobutyrylamino-Acetylamino)-Acetic Acid	6.86569	0.0153767	0.0579997
NA	NA	L-3-Hydroxy-N-Methylmorphinan Bitartrate	Inf	0.016317	0.0611887
HMDB0000625	C00257	Gluconic Acid	0.0124625	0.016317	0.0611887
HMDB0259814	C01626	Vindoline	6.63241	0.0167213	0.0623424
NA	NA	Aeruginosamide B	7.33427	0.0167213	0.0623424
HMDB0000362	NA	2-Phosphoglycerate	0.017243	0.0172098	0.0639789
HMDB0014623	D04687	Lenalidomide	Inf	0.017408	0.0645298
HMDB0014545	C07699	Nisoldipine	18.9071	0.0182982	0.067442
HMDB0010379	C04230	(2-{[(2R)-2-Hydroxy-3-(Tetradecanoyloxy)Propyl PhosphonatoOxy}Ethyl)Trimethylazanium	0.512126	0.0182982	0.067442
HMDB0253423	NA	Imidazooxazole	0.130233	0.0186967	0.0683244
NA	NA	1,3-Dichloro-6,7,8,9,10,12-Hexahydroazepino[2,1-BQuinazoline	0	0.0195257	0.0683244
HMDB0000301	C00785	Urocanic Acid	1.84224	0.0200206	0.0683244
HMDB0001256	C00750	Spermine	1.68484	0.0200206	0.0683244
HMDB0029005	NA	Phe-Thr	4.5804	0.0200206	0.0683244
NA	NA	N-(4-Fluorophenyl)-2-(4-Hydroxyquinazolin-2-Ylthio)Acetamide	0.390973	0.0200206	0.0683244
HMDB0033112	NA	Methylpyrazine	2.6422	0.0200206	0.0683244
HMDB0028913	NA	Isoleucylmethionine	5.50206	0.0200206	0.0683244
HMDB0000132	C00242	Guanine	6.41429	0.0200206	0.0683244
HMDB0242115	NA	Glyceryl Monolinoleate	2.67692	0.0200206	0.0683244
HMDB0002899	C10788	Ellagic Acid	7.91959	0.0200206	0.0683244
HMDB0251566	C13831	Dodecanamide	2.62027	0.0200206	0.0683244
HMDB0001202	C00239	dCMP	1.60141	0.0200206	0.0683244
HMDB0014352	C06838	Azithromycin	5.05709	0.0200206	0.0683244
HMDB0014328	C07514	Amphetamine	4.19497	0.0200206	0.0683244
HMDB0015554	D07440	Alverine	2.40305	0.0200206	0.0683244
HMDB0028700	NA	Alanylvaline	7.55444	0.0200206	0.0683244
HMDB0060427	C02659	Acetone Cyanohydrin	1.92496	0.0200206	0.0683244
NA	NA	8-Hydroxy-9,10-Epoxystearic Acid	2.35227	0.0200206	0.0683244
NA	NA	6-(Diaminomethylideneamino)-2-[[(4E,6E,12E,14E)-3-Hydroxy-2-(Hydroxymethyl)-8,10,16-Trimethyloctadeca-4,6,12,14-TetraenoylAminoHexanoic Acid	1.95868	0.0200206	0.0683244
HMDB0247018	C19642	5Beta-Cholanic Acid	2.4659	0.0200206	0.0683244
HMDB0061656	NA	3-Hydroxytetradecanoic Acid	0.251754	0.0200206	0.0683244
HMDB0001031	C00673	2-Deoxy-D-Ribose 5-Phosphate	0.0952063	0.0200206	0.0683244
HMDB0004666	C13856	2-Arachidonoylglycerol	2.75326	0.0200206	0.0683244
HMDB0247583	NA	2-(6-Aminopurin-9-Yl)-5-(Hydroxymethyl)Oxolane-3,4-Diol	13.3332	0.0200206	0.0683244
HMDB0029886	NA	2-(3,4-Dihydroxyoxolan-2-Yl)-2-Hydroxyethyl (9E)-Octadec-9-Enoate	2.22822	0.0200206	0.0683244
NA	NA	(5S)-17-Hydroxy-10,13-Dimethyltetradecahydro-1H-Cyclopenta[APhenanthren-3(2H)-One	2.42201	0.0200206	0.0683244
NA	NA	(2E,4E,14E)-13-Hydroperoxy-N-(2-Methylpropyl)Icosa-2,4,14-Trienamide	2.43148	0.0200206	0.0683244
HMDB0015159	C20380	Mycophenolic Acid	3.75596	0.0231119	0.0786657
HMDB0038341	NA	Glucosylisomaltol	0	0.0254679	0.0831207
HMDB0243890	C13903	1-O-Hexadecyl-Sn-Glycero-3-Phosphocholine	0.0844196	0.0255355	0.0831207
HMDB0304792	NA	Valylarginine	3.71582	0.025645	0.0831207
HMDB0028901	NA	Isoleucyl-Arginine	4.67112	0.025645	0.0831207
HMDB0000672	C19615	Hexadecanedioic Acid	0.668469	0.025645	0.0831207
HMDB0116368	NA	DG(8:0/8:0/0:0)	2.37495	0.025645	0.0831207
HMDB0000014	C00881	Deoxycytidine	4.87174	0.025645	0.0831207
HMDB0030677	C00811	Cis-P-Coumaric Acid	0.722235	0.025645	0.0831207
HMDB0240712	C14216	Bisphenol S	1.8047	0.025645	0.0831207
HMDB0032049	C06354	Benzophenone	2.81616	0.025645	0.0831207
HMDB0000072	C00417	Aconitic Acid	0.487592	0.025645	0.0831207
HMDB0303912	C09938	5-Hydroxycalamenene	2.82006	0.025645	0.0831207
HMDB0037776	NA	5,9:6,9-Diepoxy-3-Megastigmene	1.34058	0.025645	0.0831207
HMDB0001232	C00870	4-Nitrophenol	1.65886	0.025645	0.0831207
NA	NA	3-Hydroxy-1,5-Diphenyl-1-Pentanone	4.0853	0.025645	0.0831207
NA	NA	3,5-Dihydroxydecanoic Acid	3.45103	0.025645	0.0831207
HMDB0033624	NA	2-Hydroxy-3-(2-Hydroxyphenyl)Propanoic Acid	0.36795	0.025645	0.0831207
HMDB0244082	NA	1,2-Dimethylimidazole	5.99506	0.025645	0.0831207
HMDB0002264	NA	(R)-2-Hydroxycaprylic Acid	0.821388	0.025645	0.0831207
NA	NA	Deacetoxy-7-Oxogedunin	19.6285	0.0258965	0.0837256
HMDB0002825	C07480	Theobromine	0.124213	0.0285985	0.0914396
HMDB0028950	NA	Lysylglutamic Acid	37.1146	0.0285985	0.0914396
HMDB0000235	C00378	Thiamine	Inf	0.0286926	0.0914396
HMDB0253025	NA	Phenylalanylleucine	11.1936	0.0287787	0.0914396
HMDB0028993	NA	Phe-Gln	4.25821	0.0287787	0.0914396
HMDB0240655	NA	O-Cresol Sulfate	0.0143435	0.0287787	0.0914396
HMDB0001016	C03492	D-4-Phosphopantothenate	0.091741	0.0287787	0.0914396
HMDB0302836	NA	Sativic Acid	0	0.0297846	0.0941719
NA	NA	[(2R,3S,4S,5R,6R)-6-[1,7-Bis(4-Hydroxyphenyl)-5-Oxoheptan-3-YlOxy-3,4,5-Trihydroxyoxan-2-YlMethyl (E)-3-(4-Hydroxyphenyl)Prop-2-Enoate	Inf	0.0297846	0.0941719
HMDB0000292	C00385	Xanthine	0.181889	0.0325593	0.0957388
HMDB0001877	C07185	Valproic Acid	3.8098	0.0325593	0.0957388
HMDB0029108	NA	Tyrosylisoleucine	3.2397	0.0325593	0.0957388
NA	NA	R-Deprenyl N-Oxide	2.38698	0.0325593	0.0957388
HMDB0000070	C00408	Pipecolic Acid	1.87059	0.0325593	0.0957388
HMDB0256501	NA	Phthalic Anhydride	2.29783	0.0325593	0.0957388
HMDB0304788	NA	Phenylalanyl-Glycine	2.78809	0.0325593	0.0957388
NA	NA	Okaramine R	8.70165	0.0325593	0.0957388
HMDB0041929	NA	Methoxyacetic Acid	0.449001	0.0325593	0.0957388
NA	NA	Macrosphelide D	0.538364	0.0325593	0.0957388
HMDB0000181	C00355	Levodopa	0.293788	0.0325593	0.0957388
HMDB0000190	C00186	Lactic Acid	1.85713	0.0325593	0.0957388
NA	NA	Herbasterol	6.45746	0.0325593	0.0957388
HMDB0254590	NA	Gallic Acid Methyl Ester	2.00588	0.0325593	0.0957388
HMDB0000145	C00468	Estrone	6.72823	0.0325593	0.0957388
HMDB0302261	NA	Di-N-Propylamine	3.36551	0.0325593	0.0957388
HMDB0033244	C14214	Dibutyl Phthalate	2.22869	0.0325593	0.0957388
HMDB0001870	C00180	Benzoic Acid	1.63201	0.0325593	0.0957388
HMDB0001263	C04076	Allysine	0.619751	0.0325593	0.0957388
NA	C06691	Actinorhodin	0.068867	0.0325593	0.0957388
HMDB0302281	C08314	9,10-Dihydroxystearic Acid	0.693952	0.0325593	0.0957388
HMDB0039664	NA	7-Ethyl-2,3,6,7-Tetrahydrocyclopent[BAzepin-8(1H)-One	2.22914	0.0325593	0.0957388
HMDB0030030	C07288	6-Methyl-5-Hepten-2-Ol	2.75048	0.0325593	0.0957388
NA	NA	4-Methylphthalic Anhydride	2.77927	0.0325593	0.0957388
HMDB0000500	C00156	4-Hydroxybenzoic Acid	2.18763	0.0325593	0.0957388
HMDB0061655	NA	3-Hydroxytridecanoic Acid	0.165936	0.0325593	0.0957388
HMDB0061918	C12312	2-Oxindole	2.44209	0.0325593	0.0957388
NA	NA	2-[(2E)-3,7-Dimethylocta-2,6-Dienyl-3-Methoxy-5-(2-Phenylethyl)Phenol	5.49879	0.0325593	0.0957388
HMDB0030346	C09910	(S)-Actinidine	2.84434	0.0325593	0.0957388
NA	NA	(7S,9E,11S,12R,13S,14S,15S,16R,17S,18S,19E,21Z)-13-(Acetyloxy)-15,17-Dihydroxy-11-Methoxy-3,7,12,14,16,18,22-Heptamethyl-6,23,27,29-Tetraoxo-8,30-Dioxa-24-Azatetracyclo[23.3.1.1^{4,7}.0^{5,28}Triaconta-1,3,5(28),9,19,21,25-Heptaen-2-Yl 4-Chlorobenzoa...	12.9268	0.0325593	0.0957388
NA	NA	(S)-Methyl 2-(3-(6,7-Dimethoxy-4-Oxoquinazolin-3(4H)-Yl)Propanamido)-3-Methylbutanoate	NA	0.0325809	0.0957388
HMDB0003459	C00993	D-Alanyl-D-Alanine	Inf	0.0330532	0.0966862
NA	NA	Cyclo(Glycyltryptophylprolylglycylvalylglycyl-Beta-Hydroxytyrosyl)	0.011115	0.0330532	0.0966862
HMDB0252436	C18604	Forchlorfenuron	0	0.0338672	0.0988433
HMDB0003581	C01909	Desthiobiotin	7.04522	0.0351718	0.102188
HMDB0041277	NA	3-[3-Carboxy-2,3-Dihydro-2-(4-Hydroxy-3-Methoxyphenyl)-7-Methoxy-5-Benzofuranyl-2-Propenoic Acid	5.26615	0.0351718	0.102188
NA	NA	13-O-P-Coumaroylplumieride	0.104448	0.0353788	0.102559
HMDB0060026	NA	Vanilloylglycine	0.100824	0.0389552	0.111646
HMDB0000286	C00029	UDP-Glucose	Inf	0.0389552	0.111646
HMDB0001491	C00018	Pyridoxal Phosphate	0.0642751	0.0389552	0.111646
NA	NA	14-(Hydroxyethyl)-2,15-Dimethyltetracyclo[8.7.0.0<2,7.0<11,15Heptadec-7-En- 5-Yl Acetate	4.92188	0.0391373	0.111646
HMDB0259191	NA	Triethyl Phosphate	3.5037	0.0407637	0.111646
HMDB0001565	C00588	Phosphocholine	2.67537	0.0407637	0.111646
HMDB0240253	C19478	N-Acetyltaurine	0.635759	0.0407637	0.111646
HMDB0000766	NA	N-Acetylalanine	1.21496	0.0407637	0.111646
NA	NA	N-(2-Ethylphenyl)-2-(9-Methyl-6-Oxohydropurin-8-Ylthio)Acetamide	1.72578	0.0407637	0.111646
NA	NA	Methyl 3-Oxo-2-[(3,4,5-Trimethoxyphenyl)MethyleneBenzo[BFuran-5-Carboxylate	2.61937	0.0407637	0.111646
HMDB0041922	C08737	Melamine	0.626102	0.0407637	0.111646
HMDB0014372	C07074	Lovastatin	1.95371	0.0407637	0.111646
NA	C08432	Isoguanosine	5.49234	0.0407637	0.111646
HMDB0000738	C00463	Indole	1.53151	0.0407637	0.111646
HMDB0015082	D01161	Fulvestrant	6.06379	0.0407637	0.111646
HMDB0251388	C11233	Dimethyl Phthalate	2.37609	0.0407637	0.111646
NA	NA	Dimethyl Myristamine	4.15571	0.0407637	0.111646
HMDB0038457	C16952	Dihydrocapsaicin	3.83374	0.0407637	0.111646
NA	NA	Diethyl Azelate	2.29348	0.0407637	0.111646
HMDB0034159	NA	Acetyltributyl Citrate	2.09196	0.0407637	0.111646
HMDB0011718	C00633	4-Hydroxybenzaldehyde	1.32466	0.0407637	0.111646
HMDB0030770	C10702	4-Hydroxy-3-(3-Methyl-2-Butenyl)Acetophenone	0.0479331	0.0407637	0.111646
HMDB0029083	NA	2-[2-Amino-3-(1H-Indol-3-Yl)PropanamidoAcetic Acid	3.64646	0.0407637	0.111646
NA	NA	2-(Carbamimidoylsulfanyl)Ethanesulfonic Acid	1.20216	0.0407637	0.111646
NA	NA	[1,3,12-Triacetyloxy-17-(Furan-3-Yl)-4,4,8,10,13-Pentamethyl-2,3,5,6,7,9,11,12,16,17-Decahydro-1H-Cyclopenta[APhenanthren-7-Yl 2-Hydroxy-3-Methylpentanoate	0.255489	0.0407637	0.111646
NA	NA	(+)-Aspermytin A	2.20276	0.0407637	0.111646
HMDB0061643	NA	3-Carboxy-4-Methyl-5-Pentyl-2-Furanpropanoic Acid	0.0110468	0.041741	0.11408
HMDB0011171	NA	Gamma-Glutamylleucine	0.398876	0.0425229	0.115483
NA	NA	1-(2-Hydroxyethyl)-2,2,6,6-Tetramethyl-4-Hydroxypiperidine	0.111326	0.0425229	0.115483
NA	NA	(3Beta,5Xi,9Xi,13Xi,16Beta,17Xi,22R,23R,24R)-3-{[Alpha-L-Arabinofuranosyl-(1-2)-[Beta-D-Glucopyranosyl-(1-3)-Alpha-L-ArabinopyranosylOxy}-20-Hydroxy-24-Methyl-16,23:16,30-Diepoxydammar-25-En-22-Yl Acetate	0.083984	0.0425229	0.115483
HMDB0042004	C00296	Quinaldine	0.291628	0.0429937	0.116516
NA	NA	(3Beta,5Alpha,9Xi)-3-{[Beta-D-Glucopyranosyl-(1-6)-Beta-D-Glucopyranosyl-(1-4)-6-Deoxy-3-O-Methyl-Beta-L-IdopyranosylOxy}-14-Hydroxy-19-Oxocard-20(22)-Enolide	3.75245	0.0432295	0.11691
NA	NA	Hexyl 2-[(4-Hydroxy-2-Oxo-3-Hydroquinolyl)CarbonylaminoBenzoate	Inf	0.0452293	0.121807
HMDB0004668	C14765	13-OxoODE	0	0.0452293	0.121807
NA	NA	8-[2-(3,4-Dihydroxy-2,5-Dimethoxyoxolan-3-Yl)Ethyl-4A,7,8-Trimethylspiro[2,3,5,6,7,8A-Hexahydro-1H-Naphthalene-4,2-Oxirane-2,3-Diol	Inf	0.0472605	0.127013
NA	NA	(4S,5Z,6S)-4-(2-Methoxy-2-Oxoethyl)-5-[2-[(E)-3-Phenylprop-2-EnoylOxyethylidene-6-[(2S,3R,4S,5S,6R)-3,4,5-Trihydroxy-6-(Hydroxymethyl)Oxan-2-YlOxy-4H-Pyran-3-Carboxylic Acid	0.0241526	0.0476599	0.127547
NA	NA	(3,4-Dimethoxyphenyl)-N-[4-(Cyanomethyl)PhenylCarboxamide	Inf	0.0476599	0.127547
HMDB0036818	NA	Vitispirane	2.42645	0.0506708	0.127547
NA	C09249	Usambarensine	3.53849	0.0506708	0.127547
HMDB0000158	C00082	Tyrosine	0.331732	0.0506708	0.127547
HMDB0029069	NA	Thr-Pro	5.1816	0.0506708	0.127547
HMDB0001257	C00315	Spermidine	0.524441	0.0506708	0.127547
NA	C06338	Quinolinol	0.390287	0.0506708	0.127547
NA	NA	Pyroglu-Val	4.54658	0.0506708	0.127547
NA	NA	Propylene Glycol Phenyl Ether	1.73935	0.0506708	0.127547
HMDB0011180	NA	Prolylproline	2.99375	0.0506708	0.127547
HMDB0000267	C01879	Pidolic Acid	0.49129	0.0506708	0.127547
NA	NA	PFAP-PAP	0.402146	0.0506708	0.127547
HMDB0032562	C11016	N,N-Diphenylamine	2.47992	0.0506708	0.127547
HMDB0014550	D01046	Methylrosanilinium Chloride	8.57532	0.0506708	0.127547
HMDB0032923	C14516	Kojic Acid	2.28489	0.0506708	0.127547
HMDB0028854	NA	Glycylvaline	4.02074	0.0506708	0.127547
HMDB0029156	NA	Glutamylphenylalanine	4.83491	0.0506708	0.127547
HMDB0013773	C01570	D-Leucine	0.284488	0.0506708	0.127547
HMDB0001314	C00942	Cyclic Gmp	2.01722	0.0506708	0.127547
HMDB0001252	C00576	Betaine Aldehyde	2.70085	0.0506708	0.127547
HMDB0248559	NA	Arachidoyl Ethanolamide	2.05021	0.0506708	0.127547
NA	NA	4-[3-Methyl-5-(5,6,7-Trihydroxy-1,2,4A,5-Tetramethyl-3,4,6,7,8,8A-Hexahydro-2H-Naphthalen-1-Yl)Pentoxy-4-Oxobutanoic Acid	2.14809	0.0506708	0.127547
NA	NA	4,5-Dihydroxy-4,5,6-Trimethyl-2,8-Dioxa-13-Azatricyclo[8.5.1.013,16Hexadec-10-Ene-3,7-Dione	1.81588	0.0506708	0.127547
HMDB0061189	NA	3-Hydroxyisovalerylcarnitine	0.545673	0.0506708	0.127547
HMDB0246116	NA	3(2H)-Pyridazinone	0.545266	0.0506708	0.127547
HMDB0000402	C02504	2-Isopropylmalic Acid	1.89016	0.0506708	0.127547
NA	NA	2,3-Dideoxyuridine	1.69091	0.0506708	0.127547
HMDB0245345	NA	2,2,6,6-Tetramethylpiperidin-1-Ol	2.53414	0.0506708	0.127547
HMDB0249243	C03690	14C -Dehp	1.55521	0.0506708	0.127547
HMDB0254327	C08236	1,3,4,5,6,7-Hexahydroxyheptan-2-One	0.134757	0.0506708	0.127547
NA	NA	[5-Acetyloxy-3-(Hydroxymethyl)-2-Oxo-6-Propan-2-Ylcyclohex-3-En-1-Yl 3-Methylbutanoate	3.13994	0.0506708	0.127547
HMDB0003553	C01613	Stachyose	0.148253	0.0508211	0.127547
HMDB0028940	NA	Leu-Trp	14.7033	0.0508211	0.127547
NA	NA	Methyl 7-Deshydroxypyrogallin-4-Carboxylate	0.19917	0.0517058	0.129264
HMDB0000645	C00446	Galactose 1-Phosphate	0.0995588	0.0517058	0.129264
HMDB0029134	NA	Val-Phe	9.26033	0.0522378	0.129752
HMDB0000953	NA	Suberylglycine	0.240939	0.0522378	0.129752
NA	NA	3-Hydroxy-N-(1-Hydroxy-4-Methylpentan-2-Yl)-5-Oxo-6-Phenylhexanamide	5.85058	0.0522378	0.129752
HMDB0029098	NA	Tyr-Ala	9.79963	0.0525042	0.129752
NA	NA	N-[3,5-Dimethyl-4-(2-Morpholin-4-Yl-2-Oxoethoxy)Phenyl(3,4,5-Trimethoxyphenyl )Carboxamide	12.0099	0.0525042	0.129752
HMDB0030604	C10289	Epsilon-Viniferin	0.212988	0.0525042	0.129752
NA	NA	2-Decyl-3-Hydroxypentanedioic Acid	0	0.0551995	0.136152
NA	NA	2-((4-Ethyl-8,8-Dimethyl-2-Oxo-2,8,9,10-Tetrahydropyrano[2,3-FChromen-5-Yl)Oxy)-N-Isopropylacetamide	5.82048	0.0568867	0.140046
NA	NA	Maloformin B4	7.9425	0.0577328	0.141838
HMDB0033585	NA	Acesulfame	0.0663499	0.0579447	0.141838
HMDB0000807	C00597	3-Phosphoglyceric Acid	0.0327178	0.0579447	0.141838
HMDB0245678	NA	P-Nitrophenyl-Alpha-Galactopyranoside	18.6057	0.0615003	0.145515
HMDB0001554	C00655	Xanthylic Acid	2.58655	0.0621775	0.145515
NA	NA	Tris-(2-Chloroisopropyl)Phosphate	2.44332	0.0621775	0.145515
HMDB0251530	C00725	Thioctic Acid	0.397789	0.0621775	0.145515
HMDB0006344	C04148	Phenylacetylglutamine	0.290136	0.0621775	0.145515
HMDB0001858	C01468	P-Cresol	1.86697	0.0621775	0.145515
HMDB0000208	C00026	Oxoglutaric Acid	0.435768	0.0621775	0.145515
HMDB0062183	NA	N-Lactoyl-Glycine	0.490328	0.0621775	0.145515
HMDB0001186	C02567	N-Acetylspermine	6.15979	0.0621775	0.145515
HMDB0254636	NA	Methylene-Imidazole	1.89562	0.0621775	0.145515
HMDB0253648	NA	Isoindoline	1.71348	0.0621775	0.145515
HMDB0000439	NA	Furoylglycine	1.30257	0.0621775	0.145515
HMDB0036213	NA	Cis-3-Hexenyl Lactate	0.515078	0.0621775	0.145515
HMDB0000062	C00487	Carnitine	0.707367	0.0621775	0.145515
NA	NA	Capric Dimethyl Amine Oxide	2.71641	0.0621775	0.145515
HMDB0002335	NA	Aspartyl-Proline	3.31183	0.0621775	0.145515
HMDB0000019	C00141	Alpha-Ketoisovalerate	0.63108	0.0621775	0.145515
NA	NA	4-Methyoxybenzoyl-N-Glycine	0.253485	0.0621775	0.145515
HMDB0059729	NA	3,4-Methylenesebacic Acid	0.459178	0.0621775	0.145515
NA	C06670	2,4-Dichlorobenzoic Acid	0.231502	0.0621775	0.145515
NA	NA	2,3-Dihydroxypropyl 9,12,15-Octadecatrienoate	1.52817	0.0621775	0.145515
NA	NA	2-(4,5-Dibromo-6-Hydroxy-3-Oxoxanthen-9-Yl)Benzoic Acid	0.515885	0.0621775	0.145515
HMDB0041287	NA	16-Hydroxy-10-Oxohexadecanoic Acid	0.745312	0.0621775	0.145515
HMDB0059696	NA	1,2,3,4,Tetrahydro-1,5,7-Trimethylnapthalene	2.51129	0.0621775	0.145515
HMDB0003357	C00437	N-Acetylornithine	0.15864	0.0624925	0.145515
HMDB0011756	C02710	N-Acetylleucine	0.0826497	0.0624925	0.145515
HMDB0244510	NA	13-Hydroxyoctadeca-9,12-Dienoic Acid	0.125402	0.0624925	0.145515
HMDB0245544	NA	2,3-Dideoxyadenosine	Inf	0.0630068	0.146278
NA	NA	6-Ethoxy-4-({4-[(4-Methoxyphenyl)MethylPiperazinyl}Methyl)Chromen-2-One	20.1968	0.0630887	0.146278
NA	NA	Subsessiline	0.389648	0.0633871	0.146278
HMDB0036103	C16461	Geranic Acid	0.629103	0.0633871	0.146278
HMDB0251665	C01341	3-[[1-[4-(Diaminomethylideneamino)Butylamino-4-Methyl-1-Oxopentan-2-YlCarbamoylOxirane-2-Carboxylic Acid	11.4586	0.0633871	0.146278
NA	NA	(S)-Curvularin	0.0620815	0.0659319	0.151879
NA	NA	Tert-Butyl 1-(2-Furylmethyl)-5-Hydroxy-2-Methylbenzo[GIndole-3-Carboxylate	0	0.0694758	0.159757
NA	NA	3-[(2R,3S)-5-Hydroxy-2,3,8,8-Tetramethyl-4-Oxo-2,3-Dihydropyrano[2,3-HChromen-6-YlHexanoic Acid	14.6094	0.0739738	0.168474
HMDB0303943	C01617	Taxifolin	2.12548	0.0750769	0.168474
HMDB0034367	NA	Gamma-Glutamylmethionine	NA	0.0751557	0.168474
HMDB0000872	C11002	Tetradecanedioic Acid	0.70203	0.0757482	0.168474
HMDB0041974	C02575	Pentachlorophenol	1.83965	0.0757482	0.168474
HMDB0028986	NA	Met-Val	10.1983	0.0757482	0.168474
HMDB0000687	C16439	Leucine	1.61878	0.0757482	0.168474
HMDB0028914	NA	Isoleucyl-Phenylalanine	2.71138	0.0757482	0.168474
HMDB0000133	C00387	Guanosine	2.62811	0.0757482	0.168474
HMDB0003337	C00127	Glutathione (Oxidized)	6.91585	0.0757482	0.168474
HMDB0004089	C05653	Formylanthranilic Acid	1.20172	0.0757482	0.168474
NA	NA	Cyclododecalactam	1.86285	0.0757482	0.168474
HMDB0059839	C06076	Camphene	1.5782	0.0757482	0.168474
HMDB0246511	C19262	4-Methylimidazole	2.24466	0.0757482	0.168474
NA	NA	3-Hydroxy-4-Methoxy-2,3-Dihydropyran-6-One	1.6177	0.0757482	0.168474
HMDB0245025	NA	2-Aminopurine	0.747471	0.0757482	0.168474
HMDB0303335	C10910	2-(Methylthio)Benzothiazole	2.29516	0.0757482	0.168474
HMDB0003431	C00860	1H-Imidazole-4-Propanol, Beta-Amino-, (S)-	1.7829	0.0757482	0.168474
NA	NA	(5E)-10-Heptyl-3,4,5,8,9,10-Hexahydro-5,8,9-Trihydroxy-2H-Oxecin-2-One	8.315	0.0757482	0.168474
NA	NA	9-Methoxy-4,4-Dimethyl-13-Phenyl-6,14-Dioxatetracyclo[8.4.0.02,7.03,5Tetradeca-1,7,9-Trien-11-One	5.98576	0.0760702	0.1689
NA	NA	N-{(1E)-2-[4-(Dimethylamino)Phenyl-1-Azavinyl}-2-[(3,5-Dioxo(2H,4H-1,2,4-Tria Zin-6-Yl))AminoAcetamide	Inf	0.0779814	0.172549
NA	NA	Apiopaeonoside	0	0.0779814	0.172549
HMDB0013122	C04230	(2-{[(2R)-2-Hydroxy-3-[(1Z)-Octadec-1-En-1-YloxyPropyl PhosphonatoOxy}Ethyl)Trimethylazanium	0	0.0806589	0.178168
NA	NA	2H-Pyrido[1,2-A[1,4,7,10Tetraazacyclododecine-1,4,7,10(3H,12H)-Tetrone, 3-(7,8-Dihydroxy-6-Oxooctyl)Octahydro-9-(1-Methylpropyl)-6-(Phenylmethyl)-	6.11633	0.0831486	0.183353
HMDB0000071	C05512	Deoxyinosine	0.0307124	0.0840649	0.185058
HMDB0061115	C09213	Hypaphorine	0.156179	0.0866191	0.190355
NA	NA	Methyl 2-{[4-(Acetylamino)PhenylCarbonylamino}Acetate	0.196293	0.0884428	0.193143
HMDB0028931	NA	Leu-His	8.71866	0.0884428	0.193143
NA	NA	(R)-N-Acetyl-4-Naphthylalanine	4.79136	0.090387	0.193143
NA	NA	Tetradecyldiethanolamine	1.70706	0.0913313	0.193143
NA	NA	Radiclonic Acid	2.32986	0.0913313	0.193143
HMDB0240365	NA	N,N,N-Trimethyl-L-Alanyl-L-Proline Betaine	2.61725	0.0913313	0.193143
NA	NA	Mundulone	2.0382	0.0913313	0.193143
HMDB0003905	C05130	Imidazole-4-Acetaldehyde	1.4621	0.0913313	0.193143
HMDB0006961	C05235	Hydroxyacetone	0.319645	0.0913313	0.193143
HMDB0033840	NA	Dihydro-5-Methyl-2(3H)-Furanone	1.53465	0.0913313	0.193143
NA	C18573	Cyazofamid	0.137232	0.0913313	0.193143
HMDB0000094	C00158	Citric Acid	0.306484	0.0913313	0.193143
HMDB0000043	C00719	Betaine	0.725199	0.0913313	0.193143
HMDB0040408	NA	7-Hydroxy-2-Methyl-4-Oxo-4H-1-Benzopyran-5-Acetic Acid	0.494501	0.0913313	0.193143
HMDB0038949	NA	3Beta,6Beta-Dihydroxynortropane	0.377643	0.0913313	0.193143
HMDB0034889	NA	3Alpha,4,7,7Alpha-Tetrahydro-4-Hydroxy-1H-Isoindole-1,3(2H)-Dione	1.54476	0.0913313	0.193143
HMDB0240328	NA	2-O-Methyluridine	0.343135	0.0913313	0.193143
HMDB0033001	NA	2-Methylbenzothiazole	2.10625	0.0913313	0.193143
HMDB0013751	C02502	2-Hydroxypyridine	2.35539	0.0913313	0.193143
HMDB0001987	NA	2-Hydroxy-2-Methylbutyric Acid	0.331977	0.0913313	0.193143
NA	NA	2-{[(4-Methylphenyl)SulfonylAmino}-4-Methylthiobutanoic Acid	0.609597	0.0913313	0.193143
NA	NA	{6-[(2S)-5-Acetyloxy-2-(4-Acetyloxyphenyl)-4-Oxochroman-7-Yloxy-3,4,5-Triacet Yloxy-2H-3,4,5,6-Tetrahydropyran-2-Yl}Methyl (2E)-3-(4-Acetyloxyphenyl)Prop-2- Enoate	0.357202	0.0913313	0.193143
NA	NA	(5R)-5-Hydroxy-1-(4-Hydroxy-3-Methoxyphenyl)Decan-3-One	1.96809	0.0913313	0.193143
NA	NA	7-Hydroxy-N-Geranyl-L-Glutamic Acid	6.66264	0.0989035	0.208814
HMDB0000946	C07880	Ursodiol	16.9925	0.103118	0.216296
HMDB0003252	C05963	Thromboxane B2	0.0507272	0.103118	0.216296
HMDB0004620	NA	N-Acetyl-L-Arginine	0.289562	0.103118	0.216296
NA	NA	Methyl 2-Ethyl-4-[(3R,4R,5S)-5-Hydroxy-4,5-Dimethyl-2-Oxooxolan-3-Yl-2-Methyl-3-Oxobutanoate	0.0686522	0.103118	0.216296
NA	NA	6-(N-{2-[2-Methyl-5-(Trifluoromethoxy)Indol-3-YlEthyl}Carbamoyl)Cyclohex-3-En Ecarboxylic Acid	3.18992	0.105111	0.219701
NA	NA	3,3,4,4,5,5,6,6,7,7,8,8,9,9,9-Pentadecafluorononan-1-Ol	0.158023	0.106438	0.219701
NA	NA	Isoleucyl-Isoleucyl-Lysine	6.58603	0.107233	0.219701
NA	NA	3-Hydroxy-6,6-Dimethyl-2-(3,4,5-Trimethoxyphenyl)-3,5,6,7-Tetrahydrobenzimidaz Ol-4-One	2.9017	0.107233	0.219701
NA	NA	2-((7-Acetamido-1,2,3-Trimethoxy-9-Oxo-5,6,7,9-Tetrahydrobenzo[AHeptalen-10-Yl)Amino)-N-(Furan-2-Ylmethyl)-3-Methylbutanamide	3.3784	0.107233	0.219701
NA	NA	Triptophenolide	0.340729	0.10934	0.219701
NA	D00154	Santonin	2.71905	0.10934	0.219701
HMDB0003411	C00763	Proline	1.50018	0.10934	0.219701
NA	NA	PC(17:1/18:2)	2.40652	0.10934	0.219701
HMDB0304442	NA	Octadecenedioic Acid	0.130621	0.10934	0.219701
HMDB0002927	C09789	Naringin	0.123998	0.10934	0.219701
NA	C08716	Malvidin	2.34079	0.10934	0.219701
HMDB0000641	C00064	L-Glutamine	0.634366	0.10934	0.219701
HMDB0031195	C14743	Isophorone	2.32313	0.10934	0.219701
HMDB0004363	C06195	Imidazolone	1.59019	0.10934	0.219701
HMDB0000148	C00025	Glutamic Acid	0.490214	0.10934	0.219701
NA	C18415	Benthiavalicarb Isopropyl	1.44837	0.10934	0.219701
HMDB0247095	NA	6-N-Propyluracil	1.65692	0.10934	0.219701
NA	NA	5-Hydroxymethylcytidine	0.515294	0.10934	0.219701
HMDB0032918	NA	3-(2-Furanyl)-2-Propenal	0.604349	0.10934	0.219701
HMDB0001172	C00349	2-Methyl-3-Oxopropanoic Acid	0.627874	0.10934	0.219701
HMDB0245084	NA	2-Cyanoacetamide	0.728979	0.10934	0.219701
NA	NA	20Beta-Hydroxyecdysone	2.22892	0.10934	0.219701
NA	NA	2-(Acetylamino)-N-Cyclopropyl-3-Indol-3-Ylpropanamide	2.35061	0.10934	0.219701
HMDB0240707	C11033	1-Aminomethylphosphonic Acid	1.97892	0.10934	0.219701
HMDB0002123	C16361	1,3,7-Trimethyluric Acid	1.47014	0.10934	0.219701
NA	NA	(2S,3S)-3-Decyl-2-Hydroxy-2-(3-Methoxy-3-Oxopropyl)Butanedioic Acid	1.86311	0.10934	0.219701
HMDB0248668	NA	Asperulosidic Acid	Inf	0.113517	0.22774
NA	NA	Spiculisporic Acid	Inf	0.123024	0.246047
HMDB0000905	C00360	2-Deoxy-5-Adenosine Monophosphate	Inf	0.123024	0.246047
HMDB0004207	C04700	Glutamyllysine	10.2508	0.124181	0.247595
NA	NA	2-[(2E,5E,7E,11E)-10-Hydroxy-3,7,9,11-Tetramethyl-2,5,7,11-Tridecatetraen-1-Yl-5,6-Dimethoxy-3-Methyl-4-Pyridinyl 6-Deoxy-Alpha-L-Mannopyranoside	14.3002	0.124181	0.247595
HMDB0259164	C14439	Tributyl Phosphate	1.94508	0.12967	0.250036
NA	C01410	Tert-Butoxycarbonylasparagine	0.508943	0.12967	0.250036
HMDB0000243	C00022	Pyruvate	0.670399	0.12967	0.250036
NA	NA	PFSA-Cl	0.892901	0.12967	0.250036
HMDB0000210	C00864	Pantothenic Acid	0.431439	0.12967	0.250036
HMDB0015086	C07054	Isoniazid	1.86183	0.12967	0.250036
NA	NA	Homopterocarpin	1.6373	0.12967	0.250036
HMDB0000609	C00355	DOPA	0.376473	0.12967	0.250036
HMDB0000623	C02678	Dodecanedioic acid	0.759117	0.12967	0.250036
HMDB0251427	C14227	Dioctyl Phthalate	1.6107	0.12967	0.250036
HMDB0251174	NA	Dibutylamine	26.6838	0.12967	0.250036
HMDB0001123	C00108	Anthranilic Acid	2.06852	0.12967	0.250036
HMDB0001310	C01401	Alanine	0.447553	0.12967	0.250036
HMDB0247450	NA	8-Methylquinoline	1.38451	0.12967	0.250036
HMDB0030994	NA	5-Heptyltetrahydro-2-Oxo-3-Furancarboxylic Acid	0.602803	0.12967	0.250036
HMDB0029170	NA	3-Hydroxy-4-Methoxymandelate	0.200793	0.12967	0.250036
HMDB0001873	C02632	2-Methylpropanoic Acid	2.53181	0.12967	0.250036
HMDB0245149	NA	2-Hydroxyacetamide	1.91536	0.12967	0.250036
HMDB0247150	NA	2-Amino-6-Nitrobenzothiazole	3.08391	0.12967	0.250036
NA	NA	2,3-Dihydro-1H-Carbazol-4(9H)-One	0.77419	0.12967	0.250036
NA	NA	1-(4-Acetamidobenzene-1-Sulfonyl)Proline	0.298599	0.12967	0.250036
NA	NA	(10R,13S)-17-((Z)-5,5-Diphenylpenta-2,4-Dien-2-Yl)-10,13-Dimethyl-2,3,4,7,8,9,10,11,12,13,14,15,16,17-Tetradecahydro-1H-Cyclopenta[APhenanthren-3-Ol	2.05283	0.12967	0.250036
HMDB0015465	D01366	Bezafibrate	0	0.133597	0.257225
HMDB0028989	NA	Phenylalanylarginine	Inf	0.136359	0.261761
HMDB0030746	NA	5,7-Dihydroxy-2-(3-Hydroxy-4-Methoxyphenyl)-3,4-Dihydro-2H-1-Benzopyran-4-One	Inf	0.136359	0.261761
NA	NA	Sarcinaxanthin Monoglucoside	0.672735	0.143536	0.274719
HMDB0028721	NA	Arginyltyrosine	7.10805	0.143536	0.274719
NA	NA	1,5-Dibutyl-3,6-Dihydro-2H-Pyridine	0.32838	0.145849	0.277692
HMDB0252200	C06996	Fenfluramine	Inf	0.145924	0.277692
HMDB0029109	NA	Tyrosylleucine	8.80941	0.147384	0.277692
HMDB0251975	C06522	Strychnine	19.1497	0.147384	0.277692
HMDB0003572	C01850	Rosmarinic Acid	2.70923	0.147384	0.277692
HMDB0256790	C10986	Procymidone	0.0601402	0.147441	0.277692
HMDB0004679	C14776	8(S)-Hete	0.165357	0.147441	0.277692
NA	NA	Inaequalisine_A	8.12394	0.148303	0.277692
HMDB0029365	C02717	Feruloyltyramine	0.486507	0.148303	0.277692
HMDB0003312	C10208	Daidzein	0.30572	0.148303	0.277692
HMDB0002322	C01672	Cadaverine	4.18121	0.148303	0.277692
NA	C10933	Amidosulfuron	2.08579	0.148303	0.277692
HMDB0240587	C06193	3-GMP	0.0597018	0.148303	0.277692
HMDB0015044	C06527	Quinidine	2.0886	0.152838	0.277692
HMDB0000767	C02067	Pseudouridine	0.353613	0.152838	0.277692
HMDB0006695	NA	Prolylhydroxyproline	0.409489	0.152838	0.277692
HMDB0256502	NA	Phthalimide	0.311929	0.152838	0.277692
HMDB0001429	C00009	Phosphoric Acid	0.527996	0.152838	0.277692
HMDB0060015	C00850	Phenylsulfate	0.18892	0.152838	0.277692
HMDB0002284	NA	Monoacetylcadaverine	2.08493	0.152838	0.277692
HMDB0000696	C00073	Methionine	1.4701	0.152838	0.277692
HMDB0243621	C10774	Matrine	3.32118	0.152838	0.277692
HMDB0033923	C16434	L-Isoleucinel-Isoleucine	1.4887	0.152838	0.277692
HMDB0000714	C01586	Hippuric Acid	0.25934	0.152838	0.277692
HMDB0003464	C01035	Gamma-Guanidinobutyric Acid	0.334593	0.152838	0.277692
HMDB0014405	C08057	Cycloserine	1.52938	0.152838	0.277692
HMDB0001046	NA	Cotinine	3.1445	0.152838	0.277692
NA	NA	8-Bromo-6-Chloro-3-(4-Hydroxyphenyl)-4-Methylchromen-2-One	0.655746	0.152838	0.277692
HMDB0246635	NA	4-Hydroxymethohexital	2.5269	0.152838	0.277692
NA	NA	4-(3-(((2R,4S,5S,6R)-4,5-Dihydroxy-6-Methyltetrahydro-2H-Pyran-2-Yl)Oxy)-10-((E)-((4-Fluorophenethyl)Imino)Methyl)-5,14-Dihydroxy-13-Methylhexadecahydro-1H-Cyclopenta[APhenanthren-17-Yl)Furan-2(5H)-One	2.79517	0.152838	0.277692
HMDB0256256	NA	3,6,9,12-Tetraoxatetradecane-1,14-Diol	0.695696	0.152838	0.277692
HMDB0059758	C02488	2-Hydroxy-2-Ethylsuccinic Acid	0.735567	0.152838	0.277692
HMDB0001906	C03665	2-Aminoisobutyric Acid	0.424172	0.152838	0.277692
NA	NA	2-[6-Hydroxy-2-(4-Hydroxy-3-Methoxyphenyl)-3-Azabicyclo[4.4.0Dec-3-Yl-N-(4-M Ethylphenyl)Acetamide	7.17268	0.152838	0.277692
HMDB0010737	NA	(R)-3-Hydroxy-Octadecanoic Acid	0.545269	0.152838	0.277692
NA	NA	(E)-3-(Acetyloxymethyl)-5-(2-Formyl-4-Hydroxy-5,5,8A-Trimethyl-1,4,4A,6,7,8-Hexahydronaphthalen-1-Yl)Pent-2-Enoic Acid	2.05221	0.152838	0.277692
HMDB0014382	C07827	Butabarbital	3.30306	0.159298	0.289021
HMDB0253690	C05334	Isosakuranetin	Inf	0.159718	0.289376
NA	NA	2-Furanacetic Acid, Tetrahydro-Alpha-Methyl-5-(2-Oxopropyl)-, 2,3-Dihydroxypropyl Ester	0	0.161697	0.292552
HMDB0014571	D08648	Triprolidine	25.6546	0.164382	0.296992
NA	NA	[(2R,3S,4S,5R,6R)-3,4,5-Trihydroxy-6-[(2R,3R,4S,5S,6R)-3,4,5-Trihydroxy-6-(Hydroxymethyl)Oxan-2-YlOxyoxan-2-YlMethyl 7-Methyloctanoate	13.7242	0.167844	0.302823
HMDB0028686	C20958	Alanylglutamic Acid	0.489744	0.171926	0.308815
HMDB0246588	NA	4-Thiouridine	0.328509	0.171926	0.308815
NA	NA	N-Cyclopentyl-2-{4-[(6-Ethoxy-2-Oxochromen-4-Yl)MethylPiperazinyl}Acetamide	7.35818	0.172899	0.308815
NA	NA	2-[5-[2-[2-[5-[2-[2-[5-[2-[2-[5-(2-Hydroxybutyl)Oxolan-2-YlPropanoyloxyPropylOxolan-2-YlPropanoyloxyPropylOxolan-2-YlPropanoyloxyPropylOxolan-2-YlPropanoic Acid	4.00654	0.172899	0.308815
HMDB0001965	C14811	Troxilin B3	0.38303	0.173384	0.308815
HMDB0062176	NA	N-Lactoylleucine	0.760723	0.173384	0.308815
HMDB0014118	NA	Trifluoroacetic Acid	0.89675	0.178586	0.308815
HMDB0000907	NA	Sulfolithocholic Acid	2.14134	0.178586	0.308815
HMDB0014888	C07531	Prilocaine	2.00006	0.178586	0.308815
HMDB0240784	NA	O-Propanoyl-D-Carnitine	0.499998	0.178586	0.308815
HMDB0013279	NA	N-Nonanoylglycine	1.39528	0.178586	0.308815
HMDB0301734	NA	Methoxyphenylacetic Acid	1.40305	0.178586	0.308815
HMDB0036790	C16983	Kobusone	2.19663	0.178586	0.308815
HMDB0000086	C00670	Glycerol-3-Phosphocholine	0.626477	0.178586	0.308815
HMDB0000112	C00334	GABA	0.765792	0.178586	0.308815
HMDB0002151	C11143	Dimethyl Sulfoxide	1.39912	0.178586	0.308815
HMDB0036491	C08370	Diallyl Sulfide	1.5034	0.178586	0.308815
HMDB0000930	C10438	Cinnamic Acid	0.677717	0.178586	0.308815
HMDB0015373	D03472	Chloroxine	2.31931	0.178586	0.308815
HMDB0038631	C21721	Camalexin	0.214164	0.178586	0.308815
HMDB0249891	NA	Antcin K	0.497657	0.178586	0.308815
HMDB0028690	NA	Ala-Ile	2.40732	0.178586	0.308815
HMDB0001161	C01181	4-Trimethylammoniobutanoate	0.710688	0.178586	0.308815
HMDB0000779	C01479	3-Phenyllactic Acid	0.566696	0.178586	0.308815
NA	NA	3-O-Acetylpadmatin	2.31786	0.178586	0.308815
HMDB0244908	NA	3,5-Dihydroxyphenylglycine	1.46181	0.178586	0.308815
NA	NA	3-(2,6-Dihydroxyphenyl)-4-Hydroxy-6-Methyl-3H-2-Benzofuran-1-One	0.396677	0.178586	0.308815
HMDB0029636	C07214	2-Methylbenzaldehyde	0.630615	0.178586	0.308815
HMDB0031158	NA	2-Methyl-4-Pentenoic Acid	1.50299	0.178586	0.308815
HMDB0014607	NA	1-Tetradecanol Hydrogen Sulfate	0.715324	0.178586	0.308815
NA	NA	(4Beta,6Alpha)-8-Daucene-4,6-Diol	1.78812	0.178586	0.308815
HMDB0002302	NA	3-(Indol-3-Yl)Propionic Acid	Inf	0.186205	0.321558
NA	NA	N-(4-Butylphenyl)(3,4,5-Trimethoxyphenyl)Carboxamide	Inf	0.186565	0.32175
HMDB0304413	C09581	Magnoflorine	NA	0.19138	0.328907
NA	NA	Beta-D-Glucopyranose, 6-O-Beta-D-Glucopyranosyl-1-O-[(2,6,6-Trimethyl-1-Cyclohexen-1-Yl)Carbonyl-	NA	0.19138	0.328907
HMDB0000098	C00181	Xyloside	0.150986	0.19148	0.328907
NA	NA	Peucenin	0.146704	0.19512	0.333827
HMDB0028830	NA	Glutamyltryptophan	0.313867	0.19512	0.333827
NA	NA	3-Indol-3-Yl-2-[(4-Methoxyphenyl)CarbonylaminoPropanoic Acid	0.208828	0.19512	0.333827
HMDB0014351	C06539	Reserpine	0.201163	0.197697	0.33734
HMDB0028934	NA	Leucyl-Lysine	10.4187	0.197697	0.33734
NA	NA	Rhodojaponin II	5.65904	0.200424	0.340193
NA	NA	N6-Benzyl-9H-Purine-2,6-Diamine	5.96478	0.200424	0.340193
HMDB0028901	NA	Isoleucylarginine	4.08953	0.200424	0.340193
HMDB0252730	NA	16Beta-Hydroxydigitoxigenin	2.52211	0.200424	0.340193
HMDB0246113	NA	3,5-Dideoxythymidine	1.86552	0.200933	0.340608
HMDB0000098	C01394	Xylose	0.264397	0.20743	0.34394
HMDB0003555	C02059	Vitamin K1	1.8026	0.20743	0.34394
HMDB0029032	NA	Serylalanine	1.57222	0.20743	0.34394
HMDB0014621	C07236	Rimantadine	1.62071	0.20743	0.34394
HMDB0060503	C07090	Protoanemonin	0.62119	0.20743	0.34394
HMDB0060997	NA	O-Desmethyl Tramadol	2.21138	0.20743	0.34394
HMDB0014426	C07073	Lidocaine	2.53821	0.20743	0.34394
HMDB0244507	NA	Erucamide	1.61801	0.20743	0.34394
HMDB0249276	C14350	Bisphenol AF	0.258017	0.20743	0.34394
HMDB0001138	C00624	Acetyl Glutamic Acid	0.344983	0.20743	0.34394
HMDB0247909	NA	Acetoacetaldehyde	1.32796	0.20743	0.34394
HMDB0252169	NA	3,7,11-Trimethyldodeca-2,6,10-Trienoic Acid	1.95345	0.20743	0.34394
HMDB0031057	NA	2-Hydroxyhexadecanoic Acid	0.476304	0.20743	0.34394
HMDB0002074	NA	2,2-Dimethylsuccinic Acid	1.2108	0.20743	0.34394
NA	NA	[(6Z,10Z)-6-(Acetyloxymethyl)-10-(Hydroperoxymethyl)-3-Methylidene-2-Oxo-3A,4,5,8,9,11A-Hexahydrocyclodeca[BFuran-4-Yl 2-Methylbutanoate	1.29497	0.20743	0.34394
NA	NA	(4E)-1,7-Bis(4-Hydroxyphenyl)Hept-4-En-3-One	1.83969	0.20743	0.34394
NA	NA	(2E,4E,14E)-13-Hydroperoxy-1-Piperidin-1-Ylicosa-2,4,14-Trien-1-One	1.36501	0.20743	0.34394
HMDB0010407	C04230	(2-{[(2R)-3-[(1Z)-Hexadec-1-En-1-Yloxy-2-Hydroxypropyl PhosphonatoOxy}Ethyl)Trimethylazanium	0	0.2099	0.347175
HMDB0302955	NA	Manghaslin	0.284948	0.20992	0.347175
HMDB0029082	NA	Trp-Glu	0.193776	0.22173	0.366237
NA	NA	Corynoxine	Inf	0.222913	0.367251
NA	NA	(2E)-3-(2H-Benzo[3,4-D1,3-Dioxolen-5-Yl)-2-(Acetylamino)-N-Benzylprop-2-Enami De	0	0.222913	0.367251
HMDB0000781	C16265	N-Acetylgalactosamine 4-Sulfate	0.320458	0.22819	0.374987
NA	NA	[4-(Phenylcarbonyl)Phenyl-N-[(3,4,5-Trimethoxyphenyl)MethylCarboxamide	0.340383	0.22819	0.374987
NA	NA	Tetrasaccharides	0.487638	0.231545	0.379533
NA	NA	2-O-Methylinosine	0.736002	0.231545	0.379533
HMDB0001296	C02052	Maltotetraose	0.310088	0.232874	0.379871
HMDB0000299	C01762	Xanthosine	0.66607	0.239112	0.379871
HMDB0000167	C00188	Threonine	0.550353	0.239112	0.379871
HMDB0255504	D08258	Nefopam	0.296961	0.239112	0.379871
HMDB0000803	C03878	N-Acetylglucosamine	0.519336	0.239112	0.379871
HMDB0000195	C00294	Inosine	0.451444	0.239112	0.379871
HMDB0059837	NA	Indane	1.00999	0.239112	0.379871
HMDB0251169	NA	Dibenzylamine	2.74663	0.239112	0.379871
HMDB0000067	C00187	Cholesterol	0.322829	0.239112	0.379871
HMDB0032929	C14512	Benzofuran	1.49228	0.239112	0.379871
HMDB0034171	C16074	Benzeneacetonitrile	1.58436	0.239112	0.379871
HMDB0248860	NA	Baohuoside I	0.488612	0.239112	0.379871
HMDB0247607	C19670	9-Octadecenamide	0.545687	0.239112	0.379871
HMDB0010221	NA	9,10-Dihode	0.58726	0.239112	0.379871
NA	NA	8-Hydroxy-13,14,15,16-Tetranor-12-Labdanoic Acid	1.75111	0.239112	0.379871
HMDB0249518	NA	4-Methylene-2-Octyl-5-Oxotetrahydrofuran-3-Carboxylic Acid	0.907622	0.239112	0.379871
HMDB0060768	NA	4-Hydroxymethylpyrazole	1.61954	0.239112	0.379871
HMDB0245199	NA	2-Methoxy-3,4-Dimethylphenyl Acetate	2.6659	0.239112	0.379871
HMDB0246998	NA	2,6-Diamino-9-(2-Hydroxyethoxymethyl)Purine	1.69296	0.239112	0.379871
NA	NA	2-(7-Hydroxy-6-Methyloctyl)-2H-Furan-5-One	1.80167	0.239112	0.379871
HMDB0007973	C00157	1-Palmitoyl-2-Linoleoyl-Sn-Glycero-3-Phosphocholine	15.7752	0.239112	0.379871
HMDB0240628	NA	1-Carboxyethylphenylalanine	0.605642	0.239112	0.379871
HMDB0030767	NA	11,12-Dimethoxydihydrokawain	1.71244	0.239112	0.379871
HMDB0012133	C02351	1,2-Benzoquinone	1.50197	0.239112	0.379871
HMDB0061889	NA	(3E,5Z)-1,3,5-Heptatriene	1.97924	0.239112	0.379871
HMDB0033705	NA	Salviaflaside	6.43619	0.24192	0.383387
NA	NA	(3E)-3-Benzylidene-4-Methyl-1H-1,4-Benzodiazepine-2,5-Dione	3.52439	0.24192	0.383387
HMDB0060101	NA	12 Hydroxy Arachidonic Acid	0.0292511	0.243061	0.384251
NA	NA	(2E,4E)-N-[2-(4-Hydroxyphenyl)EthylDodeca-2,4-Dienamide	46.1843	0.243061	0.384251
HMDB0257214	NA	6-(Gamma,Gamma-Dimethylallylamino)Purine Riboside	1.38823	0.246429	0.389099
NA	NA	3-[2-(2,3-Dihydroxy-5,6,8A-Trimethyloctahydro-2H-Spiro[Naphthalene-1,2-Oxiran-5-Yl)Ethyl-5-Hydroxyfuran-2(5H)-One	0	0.249987	0.394233
HMDB0013302	NA	Phenylalanylphenylalanine	11.9703	0.255258	0.402055
NA	NA	N-[3,5-Bis(Trifluoromethyl)Phenyl-2-(2-1,2,3,4-Tetrahydroisoquinolyl)Acetamid E	NA	0.259435	0.407638
HMDB0040930	NA	1,5-Bis(4-Hydroxy-3-Methoxyphenyl)-1,4-Pentadien-3-One	NA	0.259435	0.407638
NA	NA	LPI(19:0)	0.751561	0.261893	0.4105
HMDB0000462	C01551	Allantoin	0.413915	0.261893	0.4105
NA	NA	Glu-Val-Phe	0.15664	0.264791	0.412026
NA	NA	2(1H)-Azulenone, 6-(Beta-D-Glucopyranosyloxy)-4,5,6,7,8,8A-Hexahydro-5-Hydroxy-5-(1-Hydroxy-1-Methylethyl)-3,8-Dimethyl-	8.97316	0.264791	0.412026
NA	NA	7-Chloro-4,8-Dihydroxy-6-Methoxy-3-Methyl-3,4-Dihydroisochromen-1-One	NA	0.265729	0.412026
NA	NA	3,5-Dihydroxy-4-[3,4,5-Trihydroxy-6-[[4-(2-Hydroxypropan-2-Yl)Cyclohexene-1-CarbonylOxymethylOxan-2-YlOxybenzoic Acid	NA	0.265729	0.412026
HMDB0254881	NA	2-Hydroxy-3-Morpholinopropanesulfonic Acid	0.143106	0.267959	0.412026
NA	NA	2,4A,6-Trihydroxy-8-Isopropyl-1,1-Dimethyl-2,3,4,4A,5,10,11,11A-Octahydro-1H-Dibenzo[A,D[7Annulen-7-Yl Beta-D-Glucopyranoside	0.399171	0.267959	0.412026
NA	NA	6-(2,4-Dihydroxy-3,5-Dimethylhexyl)-4-Hydroxy-3-Methylpyran-2-One	Inf	0.270646	0.412026
HMDB0062590	C01456	Tropic Acid	1.08186	0.274045	0.412026
HMDB0000893	C08278	Suberic Acid	0.870426	0.274045	0.412026
HMDB0000271	C00213	Sarcosine	0.60614	0.274045	0.412026
HMDB0000159	C00079	Phenylalanine	1.54824	0.274045	0.412026
HMDB0000228	C00146	Phenol	1.16506	0.274045	0.412026
NA	NA	N-Fructosyl Pyroglutamate	0.464329	0.274045	0.412026
HMDB0032805	NA	N-Feruloyloctopamine	1.24136	0.274045	0.412026
NA	NA	N-(3-Cyanophenyl)-2-(4-Hydroxyquinazolin-2-Ylthio)Acetamide	0.588151	0.274045	0.412026
HMDB0000202	C02170	Methylmalonic Acid	1.18487	0.274045	0.412026
HMDB0011473	NA	LPE(16:0)	0.258721	0.274045	0.412026
HMDB0033675	C04020	L-Lysopine	2.52132	0.274045	0.412026
HMDB0000172	C00407	L-Isoleucine	1.3158	0.274045	0.412026
HMDB0028932	NA	Leucyl-Isoleucine	1.79416	0.274045	0.412026
HMDB0000510	C00956	L-Alpha-Aminoadipate	1.65066	0.274045	0.412026
HMDB0006355	C02670	Glucurolactone	0.762813	0.274045	0.412026
HMDB0004814	NA	Dipropyl Ketone	1.45109	0.274045	0.412026
HMDB0250535	NA	Cresyl Saligenin	1.33646	0.274045	0.412026
HMDB0003573	C01479	Atropine	1.43667	0.274045	0.412026
HMDB0000045	C00020	Amp	1.53655	0.274045	0.412026
HMDB0035918	NA	7(14)-Bisabolene-2,3,10,11-Tetrol	0.733549	0.274045	0.412026
HMDB0038692	NA	6-Methyl-2-Methylene-6-Octene-1,3,8-Triol	0.352201	0.274045	0.412026
NA	NA	6-Ethoxy-4-Hydroxy-3-Benzylhydroquinolin-2-One	1.82514	0.274045	0.412026
HMDB0246561	C01877	4-Oxo-L-Proline	1.41915	0.274045	0.412026
HMDB0112086	NA	3-Methyl-5-Pentyl-2-Furanpentanoic Acid	1.71664	0.274045	0.412026
HMDB0061112	NA	3-Carboxy-4-Methyl-5-Propyl-2-Furanpropionic Acid	0.0430202	0.274045	0.412026
HMDB0061888	C14447	2-Methylpyridine	2.07038	0.274045	0.412026
NA	NA	2-{1-[(4-Chlorophenyl)Carbonyl-5-Methoxy-2-Methylindol-3-Yl}-N-(5-Ethyl(1,3,4 -Thiadiazol-2-Yl))Acetamide	0.351559	0.274045	0.412026
HMDB0244733	NA	1H-Indene-1,2(3H)-Dione	1.50442	0.274045	0.412026
HMDB0254871	NA	Monopropionylcadaverine	2.93714	0.281804	0.423198
NA	NA	7-Hydroxy-3-Phenyl-8-(Piperidylmethyl)Chromen-4-One	1.60842	0.283439	0.425159
HMDB0047909	NA	TG(14:1(9Z)/16:1(9Z)/16:1(9Z))	0.349513	0.292159	0.437221
NA	NA	15,16-Dimethoxytricyclo[12.3.1.12,6Nonadeca-1(17),2,4,6(19),14(18),15-Hexaene-3,9,17-Triol	2.07296	0.292159	0.437221
NA	NA	2-[4-Hydroxy-2,5-Bis(Hydroxymethyl)-2-[3,4,5-Trihydroxy-6-(Hydroxymethyl)Oxan-2-YlOxyoxolan-3-YlOxy-6-(Hydroxymethyl)Oxane-3,4,5-Triol	1.98776	0.296105	0.442614
HMDB0001227	C00364	dTMP	1.88321	0.298887	0.444592
NA	NA	2-O-Methyl-5-Methyluridine	2.49018	0.298887	0.444592
HMDB0028997	NA	Phenylalanylhistidine	Inf	0.299152	0.444592
NA	NA	PFAP-diPAP	0	0.299152	0.444592
NA	NA	Methyl 4,10-Diacetyloxy-5,9-Dihydroxy-1,4A-Dimethyl-7-Propan-2-Yl-2,3,4,9,10,10A-Hexahydrophenanthrene-1-Carboxylate	Inf	0.299152	0.444592
HMDB0028917	NA	2-(2-Amino-3-Methylpentanamido)-3-Hydroxybutanoic Acid	7.75725	0.300725	0.445776
HMDB0243972	NA	1-Nonadecanoyl-Glycero-3-Phosphoserine	0.429419	0.300725	0.445776
NA	NA	Methyl 3-Phenyl-2-(Phenylformamido)Propanoate	1.51132	0.301821	0.445776
NA	NA	N-Ethyl-N-(4-Ethylphenyl)-2-[(4-Hydroxyquinazolin-2-Yl)ThioAcetamide	3.59198	0.302367	0.445776
HMDB0033854	C21402	Isoprenyl Alcohol	0.579687	0.302367	0.445776
HMDB0028888	NA	Histidylisoleucine	0.646007	0.302367	0.445776
NA	C16316	13(S)-hot	0.484837	0.302367	0.445776
NA	NA	[(2R,3S,4S,5R,6S)-6-(3,4-Dihydroxybenzoyl)Oxy-3,4,5-Trihydroxyoxan-2-YlMethyl 3,4-Dihydroxybenzoate	Inf	0.305825	0.44602
NA	NA	Dehydroxynocardamine	2.65289	0.306515	0.44602
NA	NA	Butyl 4-[(3,4-Dimethoxyphenyl)CarbonylaminoBenzoate	0.163677	0.306515	0.44602
NA	C10645	Atalaphylline	0.151999	0.306515	0.44602
NA	NA	N-[(1E)-2-(3,4,5-Trimethoxyphenyl)-1-Azavinyl-N-(3,4-Dimethylphenyl)Butane-1 ,4-Diamide	NA	0.309218	0.44602
NA	NA	Methyl 19-Hydroxy-14,18-Dimethyl-12-Azahexacyclo[10.6.1.1,.0,.0,.0,Icosa-3,7(20)-Diene-3-Carboxylate	NA	0.309218	0.44602
NA	NA	Hwesasxx	NA	0.309218	0.44602
HMDB0000289	C00366	Uric Acid	0.554211	0.311868	0.44602
HMDB0000300	C00106	Uracil	0.862421	0.311868	0.44602
HMDB0000929	C00078	Tryptophan	0.534505	0.311868	0.44602
HMDB0000925	C01104	Trimethyloxamine	0.469024	0.311868	0.44602
HMDB0257686	NA	Polyinosinic Acid	1.51132	0.311868	0.44602
HMDB0028995	NA	Phenylalanylglycine	0.526054	0.311868	0.44602
HMDB0000214	C00077	Ornithine	0.839153	0.311868	0.44602
HMDB0031031	NA	O-Dodecylbenzenesulfonic Acid	0.656937	0.311868	0.44602
HMDB0031581	C14452	Morpholine	1.19607	0.311868	0.44602
HMDB0003407	C00741	Diacetyl	1.37552	0.311868	0.44602
HMDB0001570	C00364	Cyclic 3,5-Dtmp	0.242521	0.311868	0.44602
NA	C10649	Bucharaine	1.59604	0.311868	0.44602
HMDB0034074	NA	5-Oxooctadecanoic Acid	0.709849	0.311868	0.44602
HMDB0032994	NA	3-Hydroxy-2H-Pyran-2-One	0.644786	0.311868	0.44602
NA	NA	3-(Dodecanoylamino)Propyl(Carboxymethyl)Dimethylammonium	1.31276	0.311868	0.44602
HMDB0002035	C00811	2-Propenoic Acid, 3-(4-Hydroxyphenyl)-, (2Z)-	1.16621	0.311868	0.44602
HMDB0000402	C02504	2-Isopropylmalic Acid, (S)-(+)-	1.22357	0.311868	0.44602
HMDB0031713	NA	2-Hydroxy-4-Imino-2,5-Cyclohexadienone	1.20833	0.311868	0.44602
HMDB0245092	NA	2-Cyclopenten-1-One	1.30852	0.311868	0.44602
NA	NA	12-Hydroxy-13-(Hydroxymethyl)-3,5,7-Trimethyl-2,4-Tetradecadienedioic Acid	1.42075	0.311868	0.44602
NA	NA	N-(3-Methylthiophenyl)-2-[2-Oxo-4-(Pyrrolidinylcarbonyl)HydroquinolylAcetamid E	0	0.320016	0.457165
NA	NA	(2E,6E)-3,7,11,15,19,23,27,31,35-Nonamethylhexatriaconta-2,6,34-Triene-1,10,11,15,19,23,27,31-Octol	0.372483	0.336433	0.480088
HMDB0028924	NA	Leucyl-Asparagine	1.25871	0.341051	0.486139
HMDB0003540	C01367	3-Adenylic Acid	7.32371	0.342146	0.486328
HMDB0061717	NA	Succinylcarnitine	0.259336	0.342691	0.486328
HMDB0034737	NA	Notoginsenoside Fe	2.7549	0.342691	0.486328
HMDB0060656	C16561	Monoethylglycinexylidide	0.367607	0.342691	0.486328
NA	NA	N-(Benzimidazol-2-Ylethyl)-2-(4-Hydroxyquinazolin-2-Ylthio)Acetamide	3.00747	0.34858	0.489707
HMDB0240261	NA	LPI(18:0)	4.55186	0.34858	0.489707
NA	NA	5-(4-Carboxy-3-Methylbutyl)-5,6,8A-Trimethyl-3-Oxo-4A,6,7,8-Tetrahydro-4H-Naphthalene-1-Carboxylic Acid	Inf	0.35189	0.489707
HMDB0000296	C00299	Uridine	0.228656	0.353044	0.489707
HMDB0000043	C00719	Trimethyl Glycine	1.26164	0.353044	0.489707
HMDB0000912	NA	N6-Succinyladenosine	0.71967	0.353044	0.489707
HMDB0001276	C00612	N1-Acetylspermidine	1.1806	0.353044	0.489707
HMDB0013248	C03343	Mono-(2-Ethylhexyl)Phthalate	0.994706	0.353044	0.489707
HMDB0011129	NA	LPE(18:0)	0.435981	0.353044	0.489707
HMDB0000734	C21283	Indole-3-Acrylic Acid	1.59063	0.353044	0.489707
HMDB0062295	NA	Hepes	1.29015	0.353044	0.489707
HMDB0029521	C10044	Galangin	1.50681	0.353044	0.489707
HMDB0004983	C11142	Dimethyl Sulfone	0.78124	0.353044	0.489707
HMDB0004701	C14825	Coronaric Acid	0.866477	0.353044	0.489707
HMDB0249836	C01564	Cetraxate	2.87308	0.353044	0.489707
HMDB0000957	C00090	Catechol	0.832443	0.353044	0.489707
HMDB0031345	NA	Calystegine A6	1.15717	0.353044	0.489707
HMDB0032988	NA	5-Hydroxymaltol	1.65743	0.353044	0.489707
NA	NA	2-O-Methylguanosine	0.679504	0.353044	0.489707
HMDB0244994	NA	2-Amino-5-(Amino-Dimethylamino-Methylidene)Amino-Pentanoic Acid	0.623355	0.353044	0.489707
HMDB0251502	NA	1,3,5-Hexatriene	1.40584	0.353044	0.489707
HMDB0015621	D01142	Sulfadimethoxine	NA	0.357889	0.495361
NA	NA	LPS(19:0)	NA	0.357889	0.495361
NA	NA	N-(4-Methylphenyl)-2-(1-Methyl-3-Phenylthioindol-2-Yl)Acetamide	NA	0.360098	0.497885
NA	NA	2-[3-[4-[1,3-Dihydroxy-1-(4-Hydroxy-3-Methoxyphenyl)Propan-2-YlOxy-3-MethoxyphenylPropoxy-6-(Hydroxymethyl)Oxane-3,4,5-Triol	1.92096	0.376235	0.51964
NA	NA	N-(9-Oxodecyl)Acetamide	0.323228	0.380133	0.524462
HMDB0011503	NA	(2-Aminoethoxy)[(2R)-3-(Hexadecanoyloxy)-2-HydroxypropoxyPhosphinic Acid	0.56741	0.382875	0.52768
NA	NA	9,12,13-Trihydroxyoctadeca-10,15-Dienoic Acid	0.207554	0.386298	0.531829
HMDB0245570	C16500	2,3,14-Trihydroxy-10,13-Dimethyl-17-(2,3,6,7-Tetrahydroxy-6-Methylheptan-2-Yl)-2,3,4,5,9,11,12,15,16,17-Decahydro-1H-Cyclopenta[APhenanthren-6-One	Inf	0.391065	0.532923
NA	NA	Trifluoromethanesulfonic Acid	0.783556	0.397007	0.532923
HMDB0002327	NA	Tridecanedioic Acid	1.35738	0.397007	0.532923
HMDB0000273	C00214	Thymidine	1.49219	0.397007	0.532923
HMDB0030124	C01390	Prenol	1.20116	0.397007	0.532923
HMDB0040733	C00548	Phenyl Acetate	0.94364	0.397007	0.532923
NA	NA	N-Epsilon-Formyl-L-Lysine	0.751898	0.397007	0.532923
HMDB0000512	C03519	N-Acetylphenylalanine	1.2382	0.397007	0.532923
HMDB0030386	C10160	Myosmine	0.911936	0.397007	0.532923
HMDB0031864	C10454	Methyleugenol	1.83978	0.397007	0.532923
NA	NA	Methyl 2-Amino-4-(2-Bromophenyl)-5-Oxo-4H-Pyrano[3,2-CChromene-3-Carboxylate	1.31647	0.397007	0.532923
HMDB0000761	C03990	Lithocholic Acid	1.36171	0.397007	0.532923
HMDB0000193	C00311	Isocitric Acid	0.649954	0.397007	0.532923
HMDB0000671	C02043	Indole-3-Lactic Acid	1.4155	0.397007	0.532923
HMDB0005807	C01424	Gallic Acid	0.189001	0.397007	0.532923
HMDB0249565	NA	Calycin	0.536995	0.397007	0.532923
HMDB0002013	C02862	Butyrylcarnitine	0.900995	0.397007	0.532923
HMDB0003355	C00431	5-Aminovaleric Acid	1.31863	0.397007	0.532923
HMDB0001044	C00362	2-Deoxyguanosine 5-Phosphate	1.09465	0.397007	0.532923
NA	NA	2,7-Octadienoic Acid, 6-Hydroxy-2,6-Dimethyl-, (1Ar,1Bs,2S,5As,6R,6As)-2-(Beta-D-Glucopyranosyloxy)-1A,1B,2,5A,6,6A-Hexahydro-5A-Hydroxy-1A-Methyloxireno[4,5Cyclopenta[1,2-CPyran-6-Yl Ester, (2E,6S)-	1.53704	0.397007	0.532923
HMDB0245496	NA	2,5-Dihydro-1H-Pyrrole-2-Carboxylic Acid	0.703443	0.397007	0.532923
NA	NA	1-Allyl-2-Hydroxy-7,8,9,10-Tetrahydroazepino[2,1-BQuinazolin-12(6H)-One	1.5439	0.397007	0.532923
HMDB0062585	C04281	(3R,5S)-1-Pyrroline-3-Hydroxy-5-Carboxylic Acid	0.73584	0.397007	0.532923
NA	NA	(2S,3S,4S,5R,6R)-6-[[(3S,6Ar,6Bs,8As,12As,14Br)-4,4,6A,6B,11,11,14B-Heptamethyl-8A-[(2S,3R,4S,5S,6R)-3,4,5-Trihydroxy-6-(Hydroxymethyl)Oxan-2-YlOxycarbonyl-1,2,3,4A,5,6,7,8,9,10,12,12A,14,14A-Tetradecahydropicen-3-YlOxy-3,5-Dihydroxy-4-[(2S,3R,4R,5R,6S)-3,4,5-Trihydroxy-6-Methyloxan-2-YlOxyoxane-2-Carboxylic Acid	1.35509	0.397007	0.532923
NA	NA	(1R,3As,3Br,6Ar,7As,9R,11R,11As,12Ar,13Ar,15Ar)-3A,11,11A-Trihydroxy-9,15A-Dimethyl-1-(5-Oxo-2,5-Dihydro-3-Furanyl)Icosahydro-7Ah,13Ah-Cyclopenta[7,8Phenanthro[2,3-BPyrano[3,2-E[1,4Dioxine-13A-Carbaldehyde	0.614615	0.403235	0.540721
NA	NA	Pyroglu-Tyr	0	0.418212	0.560221
NA	NA	Methyl 2-[(3-Formamido-2-Hydroxybenzoyl)Amino-3-Hydroxybutanoate	0.242256	0.427158	0.571019
HMDB0246885	NA	5-O-Methylthymidine	2.33029	0.427158	0.571019
NA	NA	{4,5-Dimethoxy-3-[(3,4,5-Trimethoxyphenyl)CarbonylaminoPhenyl}-N,N-Diethylcar Boxamide	3.3921	0.4277	0.571152
NA	NA	N-[4-(Methylethyl)Phenyl-2-(9-Methyl-6-Oxohydropurin-8-Ylthio)Butanamide	NA	0.428775	0.571404
HMDB0028829	NA	Glu-Thr	0	0.428775	0.571404
NA	NA	4H-Phenanthro[10,1-BcFuran-4-One, Tetradecahydro-1,2,6,9,10-Pentahydroxy-3,10A,10C-Trimethyl-7-Methylene-, (1S,2R,3R,5As,6R,9S,10S,10As,10Cr)-	1.93764	0.431569	0.574535
HMDB0030310	C06536	Harmaline	1.76817	0.432613	0.575331
NA	NA	Sayaendoside	0.51594	0.443128	0.580525
HMDB0000888	NA	Undecanedioic Acid	0.941859	0.444169	0.580525
HMDB0031193	C19806	Tricarballylic Acid	1.16039	0.444169	0.580525
HMDB0094708	NA	Tetraethylene Glycol	0.920287	0.444169	0.580525
HMDB0256329	NA	Perfluorooctanoic Acid	1.2209	0.444169	0.580525
HMDB0061684	NA	N-Acetylisoleucine	1.12523	0.444169	0.580525
HMDB0000206	C02727	N6-Acetyl-L-Lysine	1.43007	0.444169	0.580525
NA	NA	Lignocaine N-Oxide	1.26205	0.444169	0.580525
HMDB0000175	C00130	IMP	0.603092	0.444169	0.580525
NA	C09103	Grayanotoxin I	1.1068	0.444169	0.580525
HMDB0000212	C01074	Galnac	0.792875	0.444169	0.580525
NA	NA	Bis(2-Ethylhexyl) Sebacate	0.742626	0.444169	0.580525
HMDB0028757	NA	Aspartylleucine	2.01004	0.444169	0.580525
HMDB0004710	C14835	9,10,13-Trihome	0.428045	0.444169	0.580525
HMDB0040756	NA	3-Hydroxy-6,8-Dimethoxy-7(11)-Eremophilen-12,8-Olide	0.917304	0.444169	0.580525
NA	NA	3-[(4-Hydroxyphenyl)Methyl-2,3,6,7,8,8A-Hexahydropyrrolo[1,2-APyrazine-1,4-Dione	0.420961	0.444169	0.580525
NA	NA	3-(5,7-Dimethoxy-4-Oxochromen-2-Yl)Propanoic Acid	1.63738	0.444169	0.580525
NA	NA	Carpachromene	3.4899	0.456203	0.595649
HMDB0256511	C10746	Phyllanthin	3.934	0.4738	0.617375
HMDB0249370	C09920	Brazilin	0.534007	0.4738	0.617375
HMDB0015224	C01443	Ouabain	NA	0.476585	0.620379
NA	NA	8-Methoxycanthin-6-One	0.789735	0.47994	0.624115
NA	NA	Isofraxoside	NA	0.481067	0.624322
NA	NA	2-Phenylethyl 4-(3-Ethoxy-4-Hydroxyphenyl)-7-(4-Methoxyphenyl)-2-Methyl-5-Oxo- 1,4,6,7,8-Pentahydroquinoline-3-Carboxylate	NA	0.481067	0.624322
HMDB0011664	NA	3-Methylene-Indolenine	1.7074	0.482601	0.624443
HMDB0001943	C02765	Pseudoephedrine	1.23689	0.483096	0.624443
NA	NA	2-O-Methyl-5-Methylcytidine	1.83367	0.483096	0.624443
NA	NA	1,4-Ethanonaphthalene-5,10-Dicarboxylic Acid, 1,4,4A,5,6,8A-Hexahydro-5,10-Dihydroxy-6,9-Dioxo-, Bis[[2-(Beta-D-Glucopyranosyloxy)-3-HydroxyphenylMethyl Ester	1.88094	0.483096	0.624443
NA	NA	Phenyl Hexopyranoside	0.111067	0.493963	0.629035
HMDB0013286	NA	N-Undecanoylglycine	0.953926	0.493963	0.629035
HMDB0041943	C12271	N-Acetyldopamine	1.07938	0.493963	0.629035
NA	NA	N-(3-Hydroxypropyl)-N-(3-Hydroxypropyl)Ethane-1,2-Diamide	1.75594	0.493963	0.629035
HMDB0015163	C07469	Irbesartan	0.750742	0.493963	0.629035
HMDB0028801	NA	Glutaminylleucine	1.51534	0.493963	0.629035
HMDB0005030	C06999	Fexofenadine	0.221818	0.493963	0.629035
HMDB0005960	NA	D-Pipecolic acid	1.36778	0.493963	0.629035
NA	NA	Dodecyl sulfate	0.964593	0.493963	0.629035
NA	NA	Beta-D-Glucopyranoside, 4-Hydroxy-3-(3-Methyl-2-Buten-1-Yl)Phenyl 6-O-[(2R,3R,4R)-Tetrahydro-3,4-Dihydroxy-4-(Hydroxymethyl)-2-Furanyl-	0.59115	0.493963	0.629035
HMDB0001250	C07565	Acetanilide	0.686098	0.493963	0.629035
HMDB0000500	C00156	4-Hydroxybenzoate	1.07221	0.493963	0.629035
HMDB0060371	C02514	3-Fumarylpyruvate	0.827543	0.493963	0.629035
NA	NA	2,2,4,4,6,6-Hexamethoxy-1,1-Biphenyl	0.946842	0.493963	0.629035
NA	NA	10-Ethyl-14-Methyl-12-Oxa-4-Azatetracyclo[7.6.1.0,.0,Hexadecan-13-One	1.26679	0.493963	0.629035
HMDB0028828	NA	Glutamylserine	0	0.498329	0.633344
HMDB0005038	C07572	Citalopram	0	0.498329	0.633344
NA	NA	N-Cyclohexyl-2-[1-(4-Methoxyphenyl)(1,2,3,4-Tetrahydrobeta-Carbolin-2-Yl)Acet Amide	1.72583	0.507764	0.6447
NA	NA	PFSM-ammonio_N_CMAmP_FT_FOSA	1.05726	0.509204	0.645893
HMDB0029072	NA	Threonyltryptophan	NA	0.516407	0.654387
HMDB0000860	NA	2-(3-Phenylpropanamido)Acetic Acid	0	0.522757	0.661783
NA	NA	[(2R,3S,4S,5R,6S)-3,4,5-Trihydroxy-6-[(2S,3R,4S,5S,6R)-3,4,5-Trihydroxy-6-(Hydroxymethyl)Oxan-2-YlOxyoxan-2-YlMethyl 8-Methylnonanoate	3.4317	0.527362	0.666957
NA	NA	N-Phenyl[(9,11,13-Trimethyl-8,15-Dioxatetracyclo[10.2.2.0<2,7.0<9,14Hexadec A-2(7),3,5-Trien-12-Yl)MethoxyCarboxamide	2.08161	0.533092	0.670955
NA	NA	(Z)-9,12,13-Trihydroxyoctadec-15-Enoic Acid	0.709478	0.533092	0.670955
NA	NA	(E)-5-Hydroxy-N-[3-[5-[3-[[(E)-5-Hydroxy-3-Methylpent-2-EnoylAminoPropyl-3,6-Dioxopiperazin-2-YlPropyl-3-Methylpent-2-Enamide	3.47613	0.533092	0.670955
HMDB0258305	C09643	Sinomenine	2.55858	0.534647	0.670955
HMDB0000252	C00319	Sphingosine	0.493292	0.536033	0.670955
NA	NA	1-(2,3-Dibenzimidazol-2-Ylpropyl)-2-Methoxybenzene	0.146926	0.536033	0.670955
NA	NA	3-(2-Hydroxy-3-Methoxyphenyl)-1,5-Dimethyl-4,6-Dioxo-1,2,3,5,3A,6A-Hexahydro-2 ,5-Diazapentalenecarboxylic Acid	NA	0.54511	0.670955
NA	NA	PFCA-unsaturated	0.670165	0.546646	0.670955
HMDB0255025	C05324	Nicotianamine	0.843373	0.546646	0.670955
HMDB0000812	C01042	N-Acetylaspartic Acid	0.839984	0.546646	0.670955
HMDB0029750	NA	Methyl 2-Furoate	0.896058	0.546646	0.670955
HMDB0000168	C00152	L-Asparagine	1.26584	0.546646	0.670955
HMDB0000592	C04132	Glucosamine 6-O-Sulfate	0.880278	0.546646	0.670955
NA	NA	Dimethenamide Esa	1.20736	0.546646	0.670955
HMDB0039721	C02273	Digalacturonate	1.40188	0.546646	0.670955
HMDB0000634	C02226	Citraconic Acid	0.739609	0.546646	0.670955
HMDB0032930	NA	Benzothiazole	1.39592	0.546646	0.670955
NA	NA	Anabasamine	0.348651	0.546646	0.670955
HMDB0000034	C00147	Adenine	1.15444	0.546646	0.670955
HMDB0029559	NA	4-Hydroxybenzoylcholine	1.82753	0.546646	0.670955
HMDB0258301	C05610	2-Propenal, 3-(4-Hydroxy-3,5-Dimethoxyphenyl)-	1.90672	0.546646	0.670955
HMDB0000379	NA	2-Methylcitric Acid	1.3285	0.546646	0.670955
HMDB0003771	NA	2-Methylacetoacetic Acid	0.949853	0.546646	0.670955
HMDB0000694	C03196	2-Hydroxyglutaric Acid, (S)-	0.871313	0.546646	0.670955
NA	NA	2,6-Di-Tert-Butyl-4-Nitrophenol	1.04163	0.546646	0.670955
NA	NA	2,4-Dimethylbenzenesulfonic Acid	1.65594	0.546646	0.670955
NA	NA	2-(Methylethylidene)Butanedioic Acid	1.10702	0.546646	0.670955
NA	NA	2-((7-Acetamido-1,2,3-Trimethoxy-9-Oxo-5,6,7,9-Tetrahydrobenzo[AHeptalen-10-Yl)Amino)-N-(3-(3,4-Dimethoxyphenethyl)-1H-1,2,4-Triazol-5-Yl)-4-(Methylthio)Butanamide	0.971516	0.546646	0.670955
HMDB0034587	NA	1-Pyrrolidinecarboxaldehyde	1.36948	0.546646	0.670955
HMDB0003331	C02494	1-Methyladenosine	0.865431	0.546646	0.670955
HMDB0040611	NA	(9R,10S,12Z)-9,10-Dihydroxy-8-Oxo-12-Octadecenoic Acid	0.113166	0.546646	0.670955
HMDB0014798	C07934	Metaxalone	2.60521	0.55848	0.684828
NA	NA	Imazapic	1.3888	0.56223	0.687465
HMDB0247988	D02763	Actodigin	1.35983	0.56223	0.687465
NA	NA	[4-[(3,5-Dimethylphenyl)CarbamoylaminoPhenyl Sulfamate	1.12367	0.56223	0.687465
NA	NA	Auranticin A	0	0.574071	0.701279
HMDB0029007	NA	Phe-Tyr	6.75215	0.579656	0.707432
HMDB0014936	C11334	Gentamicin Sulfate	0.34604	0.583852	0.711208
NA	NA	2-[2-Oxo-4-(Piperidylcarbonyl)Hydroquinolyl-N-(2,4,6-Trimethylphenyl)Acetamid E	0.907222	0.583852	0.711208
HMDB0000446	C12989	N-Alpha-Acetyl-L-Lysine	1.66142	0.590482	0.711271
NA	NA	Ethyl 2-Amino-6-(Hydroxymethyl)-8-Oxo-4-(3-Pyridyl)-4H-Pyrano[3,2-BPyran-3-Ca Rboxylate	0.970585	0.590482	0.711271
HMDB0000331	C01921	3A,7B,12A-Trihydroxyoxocholanyl-Glycine	0.73693	0.590482	0.711271
NA	NA	5-[(E)-3-Hydroxybut-1-Enyl-4-[4-[(E)-3-Oxobut-1-EnylAnilinoOxolan-2-One	0.672445	0.591324	0.711271
HMDB0011152	NA	LPE(P-16:0)	0.21584	0.591743	0.711271
HMDB0253404	C18598	Imazamox	0.678361	0.591743	0.711271
HMDB0039229	NA	Pyroglutaminylglutamine	1.27613	0.601548	0.711271
NA	NA	Pyroglu-Pro	0.679747	0.601548	0.711271
HMDB0001645	C01933	Norleucine	1.21573	0.601548	0.711271
HMDB0000230	C00270	N-Acetylneuraminic Acid	0.746408	0.601548	0.711271
HMDB0243607	NA	N-(3-Hydroxybutanoyl)Homoserine Lactone	1.16392	0.601548	0.711271
HMDB0258416	NA	Mycotoxin F2;Toxin F2	1.24247	0.601548	0.711271
NA	NA	Methyl 4,5,6-Trihydroxy-3-(3-Methoxy-3-Oxoprop-1-En-2-Yl)Oxycyclohexene-1-Carboxylate	0.733069	0.601548	0.711271
HMDB0002005	C02989	Methionine Sulfoxide	1.1208	0.601548	0.711271
HMDB0030311	C06538	Harmine	1.49008	0.601548	0.711271
HMDB0003423	C00303	Glutamine	0.752359	0.601548	0.711271
HMDB0011170	NA	Gamma-Glutamylisoleucine	1.3256	0.601548	0.711271
HMDB0006548	C10858	Ecgonine	1.44408	0.601548	0.711271
HMDB0000904	C00327	Citrulline	0.869579	0.601548	0.711271
HMDB0000191	C00049	Aspartic Acid	0.913597	0.601548	0.711271
HMDB0001890	C06809	Acetylcysteine	1.43376	0.601548	0.711271
NA	NA	9,13-Epoxy-3,18-Dihydroxy-15,16-Labdanolide	0.517102	0.601548	0.711271
HMDB0246781	NA	5-Dihydroxyhept-6-Enoic Acid	0.860282	0.601548	0.711271
NA	NA	5,6-Dibenzoyloxy-7-Methyl-1-[3,4,5-Trihydroxy-6-(Hydroxymethyl)Oxan-2-YlOxy-1,4A,5,6,7,7A-Hexahydrocyclopenta[CPyran-4-Carboxylic Acid	2.47589	0.601548	0.711271
HMDB0029171	NA	3-Hydroxyadipic Acid 3,6-Lactone	1.30301	0.601548	0.711271
HMDB0000729	C21297	2-Hydroxyisobutyric Acid	0.287424	0.601548	0.711271
HMDB0001975	NA	2-Ethyl-2-Hydroxybutyric Acid	0.866166	0.601548	0.711271
NA	NA	2,7-Naphthalenedisulfonic Acid	0.663797	0.601548	0.711271
NA	NA	2,3,4-Tris[[(E)-3-(3,4-Dihydroxyphenyl)Prop-2-EnoylOxy-5-(2-Methylpropanoyloxy)Hexanedioic Acid	0.673238	0.601548	0.711271
NA	NA	2,3,4,6-Tetrahydroxy-5-Oxo-5H-Benzo[7Annulene-8-Carboxylic Acid	0.86945	0.601548	0.711271
NA	NA	2-((2H-Pyrazolo[3,4-DPyrimidin-4-Yl)Amino)Ethanol	1.18297	0.601548	0.711271
HMDB0037605	NA	(10Betah,11Xi)-11-Hydroxy-13-Nor-6-Eremophilen-8-One	0.89957	0.601548	0.711271
HMDB0002580	C03642	Taurolithocholate Sulfate	1.04419	0.619371	0.731005
HMDB0001409	C00365	Deoxyuridine Monophosphate	1.21969	0.619371	0.731005
HMDB0001850	C07188	Verapamil	2.57641	0.634363	0.748015
HMDB0250581	C08797	Cucurbitacin E	0	0.639303	0.753151
NA	NA	2-[1-[4,5-Dihydroxy-3-[(2S,3R,4S,5S,6R)-3,4,5-Trihydroxy-6-(Hydroxymethyl)Oxan-2-YlOxyoxan-2-YlIndol-3-YlAcetic Acid	0	0.641599	0.755166
NA	NA	N-(3-Chloro-4-Fluorophenyl)-2-{2-Oxo-4-[N-BenzylcarbamoylHydroquinolyl}Acetam Ide	1.34277	0.64301	0.756137
HMDB0246655	NA	2,3,3-Trimethylbenzoindolenine	3.54209	0.645716	0.757649
NA	NA	Epiequisetin	1.43718	0.648859	0.757649
NA	NA	(2R,3S,4S,5S,6S)-2-(((2R,3R,4S,5S,6R)-2-Hydroxy-5-(((2R,3R,4R,5S,6R)-5-Hydroxy-4-(((2R,3R,4R,5S,6R)-3,4,5-Trihydroxy-6-(Hydroxymethyl)Tetrahydro-2H-Pyran-2-Yl)Oxy)-3-(((2R,3R,4R,5S)-3,4,5-Trihydroxytetrahydro-2H-Pyran-2-Yl)Oxy)-6-((((2R,3R,4S,5S)-3,4,...	4.61637	0.648859	0.757649
HMDB0245534	NA	2-Deoxyadenosine 3-Monophosphate	1.15267	0.649601	0.757649
HMDB0062181	NA	N-Lactoylvaline	1.04509	0.649971	0.757649
NA	NA	Yohimbinic Acid Monohydrate	1.18581	0.658978	0.757649
NA	NA	Tschimganidin	1.11633	0.658978	0.757649
HMDB0013267	NA	N-Decanoylglycine	1.0582	0.658978	0.757649
HMDB0001932	C07202	Metoprolol	1.32323	0.658978	0.757649
HMDB0000182	C00047	Lysine	1.57296	0.658978	0.757649
HMDB0028928	NA	Leucyl-Glutamate	0.819785	0.658978	0.757649
NA	NA	Graveolide	1.25821	0.658978	0.757649
HMDB0094691	C17602	Furanone A	1.27812	0.658978	0.757649
HMDB0037559	NA	Cadabicilone	1.40993	0.658978	0.757649
HMDB0249241	NA	Bistris	0.234605	0.658978	0.757649
NA	NA	Benzothiazole-2-Sulfonic Acid	0.434624	0.658978	0.757649
HMDB0011747	C03557	Aminoethylphosphonic Acid	1.18734	0.658978	0.757649
HMDB0000448	C06104	Adipic Acid	1.02839	0.658978	0.757649
HMDB0000212	C01074	Acetylgalactosamine	1.05372	0.658978	0.757649
HMDB0004708	C14833	9,12,13-Trihome	0.376015	0.658978	0.757649
HMDB0240687	C01092	8-Amino-7-Oxononanoic Acid	0.752117	0.658978	0.757649
HMDB0013127	NA	3-Hydroxybutyrylcarnitine	0.833653	0.658978	0.757649
NA	NA	3-Hydroxy-4-(Succin-2-Yl)-Caryolane Delta-Lactone	1.21213	0.658978	0.757649
NA	NA	3,3,3-Trifluoro-1-Propanol	0.996944	0.658978	0.757649
NA	NA	(6-Bromo-2-Oxochromen-3-Yl)-N-[(2-Iodophenyl)CarbonylaminoCarboxamide	0.764826	0.658978	0.757649
NA	NA	2-[6-Hydroxy-2-(3,4,5-Trimethoxyphenyl)-3-Azabicyclo[4.4.0Dec-3-Yl-N-(4-Meth Oxyphenyl)Acetamide	0	0.663197	0.761821
HMDB0011600	C00913	3-Methyladenine	0.615234	0.675999	0.775835
NA	NA	N-(2,6-Dimethylphenyl)-2-[2-Oxo-4-(N-Propylcarbamoyl)HydroquinolylAcetamide	Inf	0.684542	0.784244
HMDB0000021	C02515	3-Iodotyrosine	0	0.684542	0.784244
HMDB0062551	NA	4-Ethylphenylsulfate	Inf	0.691687	0.791727
NA	C10954	Naproanilide	1.75139	0.697185	0.797313
NA	NA	2-(2,4-Difluorophenoxy)-N-{2-[2-Methyl-5-(Phenylmethoxy)Indol-3-YlEthyl}Aceta Mide	NA	0.704396	0.800603
NA	NA	L-Pyroglutamyl-L-Phenylalanine	2.56721	0.704522	0.800603
HMDB0006555	C06196	Deoxyinosine Monophosphate	1.64779	0.704522	0.800603
NA	NA	1-Isopropyl-1,2,3,4,-Tetrahydro-Beta-Carboline-3-Carboxylic Acid	9.74721	0.704522	0.800603
NA	NA	3-[4-({2-[(2E)-2-Buten-2-Yl-6,8-Dimethyl-1,2,4A,5,6,7,8,8A-Octahydro-1-Naphthalenyl}Carbonyl)-3-Hydroxy-5-Oxo-2,5-Dihydro-1H-Pyrrol-2-Yl-2-Hydroxy-2-Methylpropanoic Acid	3.4844	0.706816	0.800603
HMDB0028847	NA	Glycylmethionine	1.15421	0.708422	0.800603
HMDB0000574	C00097	Cysteine	1.18832	0.708422	0.800603
HMDB0029009	NA	Phenylalanyl-Gamma-Glutamate	0.877401	0.709478	0.800603
NA	C15742	Cyanopeptolin A	0.9492	0.709478	0.800603
NA	NA	(2R)-2-((2S,3R)-3-Methyl-2-((7S)-5-Oxo-7,8,13,13B-Tetrahydro-5H-Benzo[1,2Indolizino[8,7-BIndole-7-Carboxamido)Pentanamido)Propanoic Acid	2.2932	0.709478	0.800603
NA	NA	[(3As,6Z,10Z,11Ar)-6-(Hydroxymethyl)-3-Methylidene-2-Oxo-3A,4,5,8,9,11A-Hexahydrocyclodeca[BFuran-10-YlMethyl Acetate	0	0.709616	0.800603
HMDB0029103	NA	Tyrosylglutamine	0.625618	0.710419	0.800603
HMDB0015418	C12662	Josamycin	1.05268	0.710419	0.800603
HMDB0000291	C05584	Vanilmandelic Acid	0.823299	0.71806	0.800603
HMDB0000224	C00346	Phosphorylethanolamine	1.22372	0.71806	0.800603
NA	NA	PFSM-perfluoroalkyl_sulfonamide	1.96355	0.71806	0.800603
HMDB0000482	C06423	Octanoic Acid	1.19218	0.71806	0.800603
HMDB0031232	NA	Monoethyl Carbonate	0.800193	0.71806	0.800603
HMDB0094660	C14175	Diethyl Phthalate	0.941393	0.71806	0.800603
HMDB0037115	NA	Desmeninol	0.965339	0.71806	0.800603
NA	NA	Delta9-Eremophilansaeure	1.01544	0.71806	0.800603
HMDB0000784	C08261	Azelaic Acid	1.26674	0.71806	0.800603
NA	NA	4-Hydroxybenzotriazole	1.03184	0.71806	0.800603
HMDB0246093	NA	3-Deoxyinosine	1.26678	0.71806	0.800603
HMDB0245820	NA	3-Aminopicolinaldehyde	0.876527	0.71806	0.800603
HMDB0001866	C05580	3,4-Dihydroxymandelic Acid	1.00441	0.71806	0.800603
HMDB0059594	C19970	2-Hydroxy-Damp	1.10185	0.71806	0.800603
HMDB0031507	NA	1-Hydroxy-2-Butanone	0.8999	0.71806	0.800603
NA	NA	1-(Aminocarbonyl)-L-Proline	0.930366	0.71806	0.800603
NA	NA	4-[(E)-3-[(2R,3R,4S,5S,6R)-3-[(2S,3R,4R)-3,4-Dihydroxy-4-(Hydroxymethyl)Oxolan-2-YlOxy-4,5-Dihydroxy-6-(Hydroxymethyl)Oxan-2-YlOxybut-1-Enyl-3,5,5-Trimethylcyclohex-2-En-1-One	1.38926	0.72446	0.807041
NA	NA	Isoleucyl-Glycyl-Isoleucine	0	0.75201	0.837008
HMDB0036438	NA	Fasciculic Acid B	1.13582	0.768031	0.8431
HMDB0014363	C07663	Moxifloxacin	0.620247	0.769866	0.8431
NA	NA	Alpha-D-Glucopyranoside, Alpha-D-Glucopyranosyl, 3-(2-Methylbutanoate)	0.854007	0.769866	0.8431
NA	NA	(2S)-2-[(Tert-Butoxy)Carbonylamino-3-[BenzyloxycarbonylPropanoic Acid	0.985525	0.769866	0.8431
NA	NA	1,2-Dihexanoyl-Sn-Glycerol	1.56106	0.77115	0.8431
NA	NA	(5-Nitro(2-Pyridyl))[(3,4,5-Trimethoxyphenyl)MethylAmine	0.853414	0.771995	0.8431
NA	NA	(2R,3R,4S,5S,6R)-2-Octoxy-6-[[(2S,3R,4S,5R)-3,4,5-Trihydroxyoxan-2-YlOxymethylOxane-3,4,5-Triol	1.34515	0.771995	0.8431
HMDB0000706	NA	Aspartyl-Phenylalanine	0.977126	0.772497	0.8431
NA	NA	{4-[(4-Hydroxy-6-Propylpyrimidin-2-Ylthio)MethylPhenyl}-N-(3-Methylphenyl)Car Boxamide	0.533647	0.772497	0.8431
NA	NA	N-{4-[N-BenzylcarbamoylPhenyl}(3,4,5-Trimethoxyphenyl)Carboxamide	0.916841	0.772747	0.8431
NA	NA	2-[2-[(Z)-Pent-2-Enyl-3-[3,4,5-Trihydroxy-6-(Hydroxymethyl)Oxan-2-YlOxycyclopentylAcetic Acid	1.31526	0.772747	0.8431
NA	NA	(1S,4S,8R,14S)-11-Ethyl-12-Oxo-7,9,13-Trioxatetracyclo[6.5.1.0(1),(1).0,(1)Tetradeca-2,5-Diene-5-Carboxylic Acid	1.82626	0.772747	0.8431
HMDB0000245	C00931	Porphobilinogen	1.06618	0.779051	0.8431
HMDB0000857	C02656	Pimelic Acid	0.982586	0.779051	0.8431
HMDB0002329	C00209	Oxalic Acid	0.959838	0.779051	0.8431
HMDB0240777	NA	O-(17-Carboxyheptadecanoyl)Carnitine	1.26706	0.779051	0.8431
HMDB0255165	NA	N-Lauroylsarcosine	1.00395	0.779051	0.8431
HMDB0000355	C03761	Meglutol	0.915273	0.779051	0.8431
HMDB0028900	NA	Isoleucyl-Alanine	1.06191	0.779051	0.8431
HMDB0005810	C05631	Eriodictyol	0.994795	0.779051	0.8431
HMDB0000426	C02612	Citramalic Acid	0.88559	0.779051	0.8431
NA	NA	Benzoylcholine	1.89413	0.779051	0.8431
HMDB0060412	C16614	6-Methylthiopurine	0.775442	0.779051	0.8431
HMDB0246643	NA	5,6-Dimethyl-2,3-Pyrazinedicarbonitrile	1.02532	0.779051	0.8431
HMDB0029646	C10680	4-O-Methylphloroacetophenone	1.01573	0.779051	0.8431
NA	NA	4-(Decan-4-Yl)Benzenesulfonic Acid	0.144769	0.779051	0.8431
HMDB0034259	C05669	3-Nitropropionic Acid	0.959132	0.779051	0.8431
HMDB0246030	NA	3,4-Dihydropyridine	0.993998	0.779051	0.8431
HMDB0255446	C16202	2-Naphthalenesulfonic Acid	1.13279	0.779051	0.8431
NA	NA	1-Methyl-3,4-Dihydro-2H-Pyrido[3,4-BIndole	0.546729	0.779051	0.8431
NA	NA	1-[4-(3,4-Dichlorophenyl)-6-(Trifluoromethyl)Pyrimidin-2-YlPyrrolidine-2-Carb Oxylic Acid	1.20724	0.779051	0.8431
HMDB0242328	NA	(1R,3R)-1-Aminocyclopentane-1,3-Dicarboxylic Acid	1.22074	0.779051	0.8431
NA	NA	(11S)-14-Ethyl-12-Ethylidene-8,14-Diazapentacyclo[9.5.2.0<1,9.0<2,7.0<14,17 Octadeca-2,4,6,9-Tetraene-10-Carbaldehyde, Iodide	0.778579	0.779051	0.8431
HMDB0242414	C05464	Deoxycholylglycine	0.18393	0.798229	0.862408
NA	NA	2H-Furo[3,2-BNaphtho[2,3-G[1,5Dioxonin-5,12-Dione, 2-[[6-O-[(2E)-3-[4-[(6-Deoxyhexopyranosyl)OxyPhenyl-1-Oxo-2-Propen-1-YlHexopyranosylOxy-3,3A,5A,6,14,14A-Hexahydro-3,8-Dihydroxy-2-(Hydroxymethyl)-6-(4-Hydroxyphenyl)-7,9-Dimethoxy-	0.660117	0.798229	0.862408
HMDB0000619	C00695	Cholic Acid	0	0.821429	0.886731
NA	NA	Quinovin	0	0.825626	0.890516
HMDB0001261	C05770	Coproporphyrin III	1.16672	0.831301	0.893046
NA	NA	(+)-12-Hydroxyamorphigenin	2.27204	0.835413	0.893046
NA	NA	Abamectin Component B1A	1.72701	0.836029	0.893046
HMDB0013317	NA	Tridecanoylglycine	1.05894	0.841125	0.893046
HMDB0029068	NA	Threonylphenylalanine	1.28262	0.841125	0.893046
HMDB0000251	C00245	Taurine	0.867348	0.841125	0.893046
HMDB0032523	C19524	Succinic Anhydride	1.08901	0.841125	0.893046
HMDB0000254	C00042	Succinic Acid	0.932182	0.841125	0.893046
HMDB0029010	NA	Prolylalanine	1.10907	0.841125	0.893046
HMDB0013716	C01826	Norvaline	0.866956	0.841125	0.893046
HMDB0011757	NA	N-Acetylvaline	0.935496	0.841125	0.893046
HMDB0000333	NA	Isohomovanillic Acid	0.670362	0.841125	0.893046
HMDB0059622	C03081	Hymecromone	0.98292	0.841125	0.893046
HMDB0250930	C10935	Diethyltoluamide	1.74288	0.841125	0.893046
HMDB0031340	C02824	Cyclamic Acid	0.905067	0.841125	0.893046
NA	NA	Cotoin	0.881177	0.841125	0.893046
HMDB0245805	NA	3-Amino-2,2-Dimethylpropanoic Acid	0.974039	0.841125	0.893046
HMDB0000252	C00319	2-Amino-4-Octadecene-1,3-Diol	1.03217	0.841125	0.893046
HMDB0036057	NA	1H-Pyrrole-2-Carboxaldehyde	0.9018	0.841125	0.893046
HMDB0259989	NA	Zardaverine	0	0.852299	0.904166
NA	NA	Deacetylgedunin	1.3418	0.864674	0.916541
NA	NA	Hypothallin	2.50758	0.867235	0.9185
HMDB0256221	C11019	Pendimethalin	NA	0.878769	0.928429
HMDB0303758	NA	Icariside D1	NA	0.878769	0.928429
NA	NA	[(1R,2S,4R,5S,6S,11R,12R,14S,16R)-5,6,11-Trihydroxy-4-(Hydroxymethyl)-8,12,15,15-Tetramethyl-7-Oxo-3-Oxapentacyclo[9.5.0.02,4.06,10.014,16Hexadec-8-En-14-Yl Dodecanoate	NA	0.878769	0.928429
NA	C02886	Hexylglutathione	0	0.894835	0.939338
NA	NA	1-Naphthalenecarboxylic Acid, 3-(Acetyloxy)-5-[2-(3-Furanyl)Ethyl-3,4,4A,5,6,7,8,8A-Octahydro-8A-(Hydroxymethyl)-5,6-Dimethyl-	1.2891	0.898291	0.939338
HMDB0034362	C08858	Convallatoxin	1.2021	0.899409	0.939338
NA	NA	(3E)-7-Hydroxy-3,7-Dimethyl-3-Octen-1-Yl 6-O-(6-Deoxy-Alpha-L-Mannopyranosyl)-Beta-D-Glucopyranoside	1.52463	0.900794	0.939338
NA	NA	6-Chloro-3-[4-(2-Hydroxyethyl)Piperazinyl-4-Phenylhydroquinolin-2-One	1.22832	0.901168	0.939338
NA	NA	3-(6,7-Dimethoxy-1,2,3,4-Tetrahydroisoquinolin-1-Yl)Propan-1-Ol	1.04549	0.901168	0.939338
HMDB0000875	C01004	Trigonelline	0.982422	0.904386	0.939338
HMDB0244121	NA	Tetrahydropyridine	1.14409	0.904386	0.939338
HMDB0001271	C01168	Pseudouridine 5-Phosphate	0.975825	0.904386	0.939338
HMDB0002141	NA	N-Methyl-A-Aminoisobutyric Acid	0.881776	0.904386	0.939338
HMDB0000177	C00135	Histidine	0.74305	0.904386	0.939338
HMDB0000125	C00051	Glutathione (Reduced)	1.62713	0.904386	0.939338
HMDB0035749	C08944	Ginsenoside Re	0.802072	0.904386	0.939338
HMDB0000044	C00072	Ascorbic Acid	0.616064	0.904386	0.939338
NA	NA	6-Chloro-2-(Trichloromethyl)Chromen-4-One	1.02632	0.904386	0.939338
HMDB0246248	NA	5,6-Dihydroxy-2-Methylaminotetralin	1.84757	0.904386	0.939338
HMDB0247125	NA	2-Pyrazinoylguanidine	1.1614	0.904386	0.939338
HMDB0002287	NA	2(3H)-Thiophenone, 3-Aminodihydro-, (S)-	1.00372	0.904386	0.939338
HMDB0244228	C16538	1,5-Anhydrosorbitol	0.762598	0.904386	0.939338
HMDB0036998	NA	(S)-Oleuropeic Acid	0.844755	0.904386	0.939338
HMDB0033560	NA	(E)-5-(3,4,5,6-Tetrahydro-3-Pyridylidenemethyl)-2-Furanmethanol	1.0751	0.904386	0.939338
NA	NA	2-[3-Oxo-2-[5-[3,4,5-Trihydroxy-6-(Hydroxymethyl)Oxan-2-YlOxypent-2-EnylCyclopentylAcetic Acid	0	0.92583	0.960837
HMDB0041947	NA	N1,N8-Diacetylspermidine	0.299969	0.933386	0.967778
HMDB0029723	C12283	Saccharin	0.452245	0.934018	0.967778
HMDB0030005	NA	Austalide A	NA	0.961406	0.985528
NA	NA	Veratroylzygadenine	0	0.964854	0.985528
NA	NA	PG 16:0_20:5;O	0.414807	0.966855	0.985528
HMDB0011741	NA	Gamma-Glutamyltyrosine	1.16208	0.966855	0.985528
NA	NA	2,4-Dihydroxy-5-Methoxy-2A,5A,7-Trimethyldodecahydrodispiro[Furan-3,2-Furan-5,6-Naphtho[1,8-BcFuran-2(2AH)-One	1.47931	0.966855	0.985528
NA	NA	Isoprenylhydroquinone Glucoside	1.08152	0.967056	0.985528
HMDB0251214	C14686	Dicyclohexylamine	1.05789	0.967093	0.985528
HMDB0245528	NA	2-Desoxyuridine	0.999111	0.967093	0.985528
HMDB0258632	C12043	Surfactin	1.15904	0.967957	0.985528
NA	NA	Pyroglutamylisoleucine	1.02452	0.967957	0.985528
HMDB0001431	C00534	Pyridoxamine Dihydrochloride	0.784789	0.967957	0.985528
HMDB0013139	C14519	Pyrenol	1.20493	0.967957	0.985528
NA	NA	PFCA-H	0.708105	0.967957	0.985528
HMDB0005765	C21016	Ophthalmic Acid	0.751182	0.967957	0.985528
HMDB0001539	C03626	N,N-Dimethylarginine	1.12982	0.967957	0.985528
HMDB0040646	NA	Myrsinone	1.05405	0.967957	0.985528
HMDB0000157	C00262	Hypoxanthine	1.01094	0.967957	0.985528
NA	NA	Hydroxysuberic Acid	1.00518	0.967957	0.985528
HMDB0001397	C00144	GMP	1.08252	0.967957	0.985528
HMDB0028831	NA	Glutamyltyrosine	0.897191	0.967957	0.985528
HMDB0000068	C00788	Epinephrine	1.0655	0.967957	0.985528
HMDB0000076	C00429	Dihydrouracil	0.977096	0.967957	0.985528
NA	NA	Ziyuglycoside I	1.22458	1	1
NA	NA	Trichophycin B	7.18526	1	1
NA	NA	N-[2-(3,4-Dimethoxyphenyl)Ethyl-2-(4-Methylphenoxy)Acetamide	1.06796	1	1
HMDB0033752	C01198	Melilotic Acid	1.06253	1	1
HMDB0253801	NA	Kinetin Riboside	0.99514	1	1
HMDB0038017	NA	Ethyl 2-Phenyl-3-Furancarboxylate	0.904207	1	1
HMDB0003045	C05570	Ergothioneine	2.08305	1	1
HMDB0251144	D03771	Diaveridine	1.0686	1	1
NA	NA	Cypridinid Etioluciferin	0.326572	1	1
NA	C10034	Cupressuflavone	NA	1	1
NA	NA	Apiopaenoside	0	1	1
NA	NA	7-Hydroxy-1-({2-O-[(2E,6E)-8-Hydroxy-2,6-Dimethyl-2,6-Octadienoyl-Beta-D-Glucopyranosyl}Oxy)-7-Methyl-1,4A,5,6,7,7A-Hexahydrocyclopenta[CPyran-4-Carboxylic Acid	NA	1	1
NA	NA	6-Amino-4-(4-Hydroxy-5-Methoxy-3-Nitrophenyl)-3-Methyl-1-Phenyl-4H-Pyrano[3,2- DPyrazole-5-Carbonitrile	0.998069	1	1
NA	NA	4-Methyl-11-(4-Sulfophenyl)Tridecanoic Acid	0.857834	1	1
NA	NA	3-Hydroxy-6-[[(E)-3-Hydroxy-2,4-Dimethylhept-4-EnoylAmino-2,4-Dimethyl-5-Oxohexanoic Acid	0.851913	1	1
HMDB0062676	NA	2-Hydroxyacrylic Acid	0.99993	1	1
NA	NA	2-[Bisbenzylamino-1-(4-Hydroxy-3-Methoxyphenyl)Ethan-1-One, Chloride	0.553793	1	1
HMDB0011130	C21484	1-Octadecanoyl-Sn-Glycero-3-Phosphoethanolamine	0.633409	1	1
NA	NA	1,4-Cyclohexanedicarboxylic Acid	1.50351	1	1
NA	NA	[4-(2-1,2,3,4-Tetrahydroisoquinolylmethyl)Phenyl-N-(2-{[4-(2-1,2,3,4-Tetrahyd Roisoquinolylmethyl)PhenylCarbonylamino}Ethyl)Carboxamide	0	1	1
NA	NA	[(2R,3R,4S,5S,6R)-3-Acetyloxy-2-(Acetyloxymethyl)-5-Hexanoyloxy-6-[(2S,3R)-2,3,4-TrihydroxybutoxyOxan-4-Yl 14-Hydroxytetradecanoate	NA	1	1
NA	NA	[(10Z)-6,10-Bis(Hydroxymethyl)-3-Methylidene-2-Oxo-3A,4,5,6,7,8,9,11A-Octahydrocyclodeca[BFuran-4-Yl 2-Methylprop-2-Enoate	1.31392	1	1
HMDB0011506	NA	(2-Aminoethoxy)[(2R)-2-Hydroxy-3-[(9Z)-Octadec-9-EnoyloxyPropoxyPhosphinic Acid	1.00617	1	1
